# Supplementary material for: Multiscale characterization of ageing and cancer progression by a novel network entropy measure
Source: Royal Society of Chemistry journal article supplement (doi:10.1039/c5mb00143a), 2015-04-20
Supplement: c5mb00143a10.xlsx [file c5mb00143a10.xlsx]

## Sheet: Foglio1
KEGG GROUPS	METAPATHWAY	PATHWAYS
Metabolism	Carbohydrate metabolism	Glycolysis / Gluconeogenesis	Citrate cycle (TCA cycle)	Pentose phosphate pathway	Pentose and glucuronate interconversions	Fructose and mannose metabolism	Galactose metabolism	Ascorbate and aldarate metabolism	Starch and sucrose metabolism	Amino sugar and nucleotide sugar metabolism	Pyruvate metabolism	Glyoxylate and dicarboxylate metabolism	Propanoate metabolism	Butanoate metabolism	C5-Branched dibasic acid metabolism	Inositol phosphate metabolism
	Energy metabolism	Oxidative phosphorylation	Photosynthesis	Photosynthesis - antenna proteins	Carbon fixation in photosynthetic organisms	Carbon fixation pathways in prokaryotes	Methane metabolism	Nitrogen metabolism	Sulfur metabolism
	Lipid metabolism	Fatty acid biosynthesis	Fatty acid elongation	Fatty acid metabolism	Synthesis and degradation of ketone bodies	Cutin, suberine and wax biosynthesis	Steroid biosynthesis	Primary bile acid biosynthesis	Secondary bile acid biosynthesis	Steroid hormone biosynthesis	Glycerolipid metabolism	Glycerophospholipid metabolism	Ether lipid metabolism	Sphingolipid metabolism	Arachidonic acid metabolism	Linoleic acid metabolism	alpha-Linolenic acid metabolism	Biosynthesis of unsaturated fatty acids
	Nucleotide metabolism	Purine metabolism	Pyrimidine metabolism
	Amino acid metabolism	Alanine, aspartate and glutamate metabolism	Glycine, serine and threonine metabolism	Cysteine and methionine metabolism	Valine, leucine and isoleucine degradation	Valine, leucine and isoleucine biosynthesis	Lysine biosynthesis	Lysine degradation	Arginine and proline metabolism	Histidine metabolism	Tyrosine metabolism	Phenylalanine metabolism	Tryptophan metabolism	Phenylalanine, tyrosine and tryptophan biosynthesis
	Metabolism of other amino acids	beta-Alanine metabolism	Taurine and hypotaurine metabolism	Phosphonate and phosphinate metabolism	Selenocompound metabolism	Cyanoamino acid metabolism	D-Glutamine and D-glutamate metabolism	D-Arginine and D-ornithine metabolism	D-Alanine metabolism	Glutathione metabolism
	Glycan biosynthesis and metabolism	N-Glycan biosynthesis	Various types of N-glycan biosynthesis	Mucin type O-Glycan biosynthesis	Other types of O-glycan biosynthesis	Glycosaminoglycan biosynthesis - chondroitin sulfate / dermatan sulfate	Glycosaminoglycan biosynthesis - heparan sulfate / heparin	Glycosaminoglycan biosynthesis - keratan sulfate	Glycosaminoglycan degradation	Glycosylphosphatidylinositol(GPI)-anchor biosynthesis	Glycosphingolipid biosynthesis - lacto and neolacto series	Glycosphingolipid biosynthesis - globo series	Glycosphingolipid biosynthesis - ganglio series	Lipopolysaccharide biosynthesis	Peptidoglycan biosynthesis	Other glycan degradation
	Metabolism of cofactors and vitamins	Thiamine metabolism	Riboflavin metabolism	Vitamin B6 metabolism	Nicotinate and nicotinamide metabolism	Pantothenate and CoA biosynthesis	Biotin metabolism	Lipoic acid metabolism	Folate biosynthesis	One carbon pool by folate	Retinol metabolism	Porphyrin and chlorophyll metabolism	Ubiquinone and other terpenoid-quinone biosynthesis
	Metabolism of terpenoids and polyketides	Terpenoid backbone biosynthesis	Monoterpenoid biosynthesis	Sesquiterpenoid and triterpenoid biosynthesis	Diterpenoid biosynthesis	Carotenoid biosynthesis	Brassinosteroid biosynthesis	Insect hormone biosynthesis	Zeatin biosynthesis	Limonene and pinene degradation	Geraniol degradation	Type I polyketide structures	Biosynthesis of 12-, 14- and 16-membered macrolides	Biosynthesis of ansamycins	Biosynthesis of type II polyketide backbone	Biosynthesis of type II polyketide products	Tetracycline biosynthesis	Polyketide sugar unit biosynthesis	Nonribosomal peptide structures	Biosynthesis of siderophore group nonribosomal peptides	Biosynthesis of vancomycin group antibiotics
	Biosynthesis of other secondary metabolites	Phenylpropanoid biosynthesis	Stilbenoid, diarylheptanoid and gingerol biosynthesis	Flavonoid biosynthesis	Flavone and flavonol biosynthesis	Anthocyanin biosynthesis	Isoflavonoid biosynthesis	Indole alkaloid biosynthesis	Isoquinoline alkaloid biosynthesis	Tropane, piperidine and pyridine alkaloid biosynthesis	Acridone alkaloid biosynthesis	Caffeine metabolism	Betalain biosynthesis	Glucosinolate biosynthesis	Benzoxazinoid biosynthesis	Penicillin and cephalosporin biosynthesis	beta-Lactam resistance	Streptomycin biosynthesis	Butirosin and neomycin biosynthesis	Clavulanic acid biosynthesis	Puromycin biosynthesis	Novobiocin biosynthesis
	Xenobiotics biodegradation and metabolism	Benzoate degradation	Aminobenzoate degradation	Fluorobenzoate degradation	Chloroalkane and chloroalkene degradation	Chlorocyclohexane and chlorobenzene degradation	Toluene degradation	Xylene degradation	Nitrotoluene degradation	Ethylbenzene degradation	Styrene degradation	Atrazine degradation	Caprolactam degradation	DDT degradation	Bisphenol degradation	Dioxin degradation	Naphthalene degradation	Polycyclic aromatic hydrocarbon degradation	Steroid degradation	Metabolism of xenobiotics by cytochrome P450	Drug metabolism - cytochrome P450	Drug metabolism - other enzymes
	Reaction module maps	2-Oxocarboxylic acid metabolism	Degradation of aromatic compounds
	Chemical structure transformation maps	Overview of biosynthetic pathways	Biosynthesis of plant secondary metabolites	Biosynthesis of phenylpropanoids	Biosynthesis of terpenoids and steroids	Biosynthesis of alkaloids derived from shikimate pathway	Biosynthesis of alkaloids derived from ornithine, lysine and nicotinic acid	Biosynthesis of alkaloids derived from histidine and purine	Biosynthesis of alkaloids derived from terpenoid and polyketide	Biosynthesis of plant hormones
Genetic Information Processing	Transcription	RNA polymerase	Basal transcription factors	Spliceosome
	Translation	Ribosome	Aminoacyl-tRNA biosynthesis	RNA transport	mRNA surveillance pathway	Ribosome biogenesis in eukaryotes
	Folding, sorting and degradation	Protein export	Protein processing in endoplasmic reticulum	SNARE interactions in vesicular transport	Ubiquitin mediated proteolysis	Sulfur relay system	Proteasome	RNA degradation
	Replication and repair	DNA replication	Base excision repair	Nucleotide excision repair	Mismatch repair	Homologous recombination	Non-homologous end-joining	Fanconi anemia pathway
Environmental Information Processing	Membrane transport	ABC transporters	Phosphotransferase system (PTS)	Bacterial secretion system
	Signal transduction	Two-component system	MAPK signaling pathway	MAPK signaling pathway - fly	MAPK signaling pathway - yeast	ErbB signaling pathway	Wnt signaling pathway	Notch signaling pathway	Hedgehog signaling pathway	TGF-beta signaling pathway	Hippo signaling pathway - fly	VEGF signaling pathway	Jak-STAT signaling pathway	NF-kappa B signaling pathway	HIF-1 signaling pathway	Calcium signaling pathway	Phosphatidylinositol signaling system	PI3K-Akt signaling pathway	mTOR signaling pathway	Plant hormone signal transduction
	Signaling molecules and interaction	Neuroactive ligand-receptor interaction	Cytokine-cytokine receptor interaction	ECM-receptor interaction	Cell adhesion molecules (CAMs)
Cellular Processes	Transport and catabolism	Endocytosis	Phagosome	Lysosome	Peroxisome	Regulation of autophagy
	Cell motility	Bacterial chemotaxis	Flagellar assembly	Regulation of actin cytoskeleton
	Cell growth and death	Cell cycle	Cell cycle - yeast	Cell cycle - Caulobacter	Meiosis - yeast	Oocyte meiosis	Apoptosis	p53 signaling pathway
	Cell communication	Focal adhesion	Adherens junction	Tight junction	Gap junction
Organismal Systems	Immune system	Hematopoietic cell lineage	Complement and coagulation cascades	Toll-like receptor signaling pathway	NOD-like receptor signaling pathway	RIG-I-like receptor signaling pathway	Cytosolic DNA-sensing pathway	Natural killer cell mediated cytotoxicity	Antigen processing and presentation	T cell receptor signaling pathway	B cell receptor signaling pathway	Fc epsilon RI signaling pathway	Fc gamma R-mediated phagocytosis	Leukocyte transendothelial migration	Intestinal immune network for IgA production	Chemokine signaling pathway
	Endocrine system	Insulin signaling pathway	Adipocytokine signaling pathway	PPAR signaling pathway	GnRH signaling pathway	Progesterone-mediated oocyte maturation	Melanogenesis	Renin-angiotensin system
	Circulatory system	Cardiac muscle contraction	Vascular smooth muscle contraction
	Digestive system	Salivary secretion	Gastric acid secretion	Pancreatic secretion	Bile secretion	Carbohydrate digestion and absorption	Protein digestion and absorption	Fat digestion and absorption	Vitamin digestion and absorption	Mineral absorption
	Excretory system	Vasopressin-regulated water reabsorption	Aldosterone-regulated sodium reabsorption	Endocrine and other factor-regulated calcium reabsorption	Proximal tubule bicarbonate reclamation	Collecting duct acid secretion
	Nervous system	Glutamatergic synapse	GABAergic synapse	Cholinergic synapse	Dopaminergic synapse	Serotonergic synapse	Long-term potentiation	Long-term depression	Retrograde endocannabinoid signaling	Synaptic vesicle cycle	Neurotrophin signaling pathway
	Sensory system	Phototransduction	Phototransduction - fly	Olfactory transduction	Taste transduction
	Development	Dorso-ventral axis formation	Axon guidance	Osteoclast differentiation
	Environmental adaptation	Circadian rhythm	Circadian entrainment	Circadian rhythm - fly	Circadian rhythm - plant	Plant-pathogen interaction
Human Diseases	Cancers	Pathways in cancer	Transcriptional misregulation in cancer	Chemical carcinogenesis	Viral carcinogenesis	Colorectal cancer	Pancreatic cancer	Glioma	Thyroid cancer	Acute myeloid leukemia	Chronic myeloid leukemia	Basal cell carcinoma	Melanoma	Renal cell carcinoma	Bladder cancer	Prostate cancer	Endometrial cancer	Small cell lung cancer	Non-small cell lung cancer
	Immune diseases	Asthma	Systemic lupus erythematosus	Rheumatoid arthritis	Autoimmune thyroid disease	Allograft rejection	Graft-versus-host disease	Primary immunodeficiency
	Neurodegenerative diseases	Alzheimer's disease	Parkinson's disease	Amyotrophic lateral sclerosis (ALS)	Huntington's disease	Prion diseases
	Substance dependence	Cocaine addiction	Amphetamine addiction	Morphine addiction	Nicotine addiction	Alcoholism
	Cardiovascular diseases	Hypertrophic cardiomyopathy (HCM)	Arrhythmogenic right ventricular cardiomyopathy (ARVC)	Dilated cardiomyopathy	Viral myocarditis
	Endocrine and metabolic diseases	Type I diabetes mellitus	Type II diabetes mellitus	Maturity onset diabetes of the young
	Infectious diseases: Bacterial	Vibrio cholerae infection	Vibrio cholerae pathogenic cycle	Epithelial cell signaling in Helicobacter pylori infection	Pathogenic Escherichia coli infection	Salmonella infection	Shigellosis	Pertussis	Legionellosis	Staphylococcus aureus infection	Tuberculosis	Bacterial invasion of epithelial cells
	Infectious diseases: Viral	HTLV-I infection	Measles	Influenza A	Hepatitis B	Hepatitis C	Herpes simplex infection	Epstein-Barr virus infection
	Infectious diseases: Parasitic	Amoebiasis	Malaria	Toxoplasmosis	Leishmaniasis	Chagas disease (American trypanosomiasis)	African trypanosomiasis
