# Supplementary material for: Multiscale characterization of ageing and cancer progression by a novel network entropy measure
Source: Royal Society of Chemistry journal article supplement (doi:10.1039/c5mb00143a), 2015-04-20
Supplement: c5mb00143a11.xlsx [file c5mb00143a11.xlsx]

## Sheet: Colon genes
Gene	Path	pval ranksum	median SN normal	median SN CRC	DeltaSN CRC-normal
'A2M'	'04610: Complement and coagulation cascades, 05010: Alzheimer''s disease'	0.0107811	6.99478	7.0079	0.0131252
'AANAT'	'00380: Tryptophan metabolism'	0.258636	7.04453	7.0382	-0.00633527
'AARS'	'00252: Alanine and aspartate metabolism, 00970: Aminoacyl-tRNA biosynthesis'	0.0305861	6.95926	6.94843	-0.0108267
'AASDHPPT'	'00300: Lysine biosynthesis, 00310: Lysine degradation'	0.0658171	6.98319	6.97259	-0.0106004
'AASS'	'00300: Lysine biosynthesis, 00310: Lysine degradation'	0.871799	7.08824	7.08781	-0.000429669
'ABAT'	'00251: Glutamate metabolism, 00252: Alanine and aspartate metabolism, 00280: Valine, leucine and isoleucine degradation, 00410: beta-Alanine metabolism, 00640: Propanoate metabolism, 00650: Butanoate metabolism'	0.0420206	6.97936	7.0028	0.0234414
'ABCA1'	'02010: ABC transporters - General'	0.383524	7.05915	7.0587	-0.000452276
'ABCA4'	'02010: ABC transporters - General'	1	7.04132	7.04229	0.000973099
'ABCA6'	'02010: ABC transporters - General'	0.539729	7.05107	7.05101	-6.30482e-05
'ABCA7'	'02010: ABC transporters - General'	0.674797	7.00438	7.0043	-7.89991e-05
'ABCA9'	'02010: ABC transporters - General'	0.457892	7.11509	7.11982	0.00472327
'ABCB1'	'02010: ABC transporters - General'	0.00738835	7.02834	7.0542	0.0258589
'ABCB7'	'02010: ABC transporters - General'	0.146399	7.01968	7.02601	0.00632944
'ABCB8'	'02010: ABC transporters - General'	0.0107811	7.03269	7.02457	-0.00812539
'ABCC2'	'02010: ABC transporters - General'	0.056882	7.04481	7.0383	-0.00650964
'ABCC3'	'02010: ABC transporters - General'	0.00139729	6.96212	6.99047	0.0283485
'ABCC4'	'02010: ABC transporters - General'	0.457892	7.02813	7.02112	-0.00700741
'ABCC8'	'02010: ABC transporters - General, 04930: Type II diabetes mellitus'	0.0758785	7.04735	7.04423	-0.00311878
'ABCC9'	'02010: ABC transporters - General'	0.922866	7.04201	7.04084	-0.00117727
'ABCD1'	'02010: ABC transporters - General'	0.821261	7.03183	7.03271	0.000881973
'ABCD2'	'02010: ABC transporters - General'	0.871799	7.03901	7.03831	-0.000702771
'ABCD3'	'02010: ABC transporters - General'	0.146399	6.92924	6.93713	0.00789283
'ABCG2'	'02010: ABC transporters - General'	0.000886374	6.90958	6.99239	0.0828157
'ABCG5'	'02010: ABC transporters - General'	0.497916	7.03357	7.0395	0.00592913
'ABCG8'	'02010: ABC transporters - General'	0.317059	7.03523	7.04065	0.00541916
'ABI2'	'04810: Regulation of actin cytoskeleton'	0.0758785	7.00918	7.00073	-0.00845485
'ABL1'	'04110: Cell cycle, 04360: Axon guidance, 05130: Pathogenic Escherichia coli infection - EHEC, 05131: Pathogenic Escherichia coli infection - EPEC, 05220: Chronic myeloid leukemia'	0.457892	7.0445	7.04804	0.00354137
'ABLIM1'	'04360: Axon guidance'	0.317059	6.94224	6.95017	0.00793047
'ABLIM3'	'04360: Axon guidance'	0.457892	7.01222	7.01488	0.00266207
'ABP1'	'00220: Urea cycle and metabolism of amino groups, 00260: Glycine, serine and threonine metabolism, 00340: Histidine metabolism, 00350: Tyrosine metabolism, 00360: Phenylalanine metabolism, 00380: Tryptophan metabolism, 00410: beta-Alanine metabolism, 00960: Alkaloid biosynthesis II'	0.871799	7.02581	7.02954	0.00372831
'ACAA2'	'00062: Fatty acid elongation in mitochondria, 00071: Fatty acid metabolism, 00120: Bile acid biosynthesis, 00280: Valine, leucine and isoleucine degradation, 00362: Benzoate degradation via hydroxylation'	0.00139729	6.94745	6.97288	0.0254271
'ACACA'	'00061: Fatty acid biosynthesis, 00620: Pyruvate metabolism, 00640: Propanoate metabolism, 04910: Insulin signaling pathway'	0.317059	7.06263	7.06032	-0.00230686
'ACACB'	'00061: Fatty acid biosynthesis, 00620: Pyruvate metabolism, 00640: Propanoate metabolism, 04910: Insulin signaling pathway, 04920: Adipocytokine signaling pathway'	0.00407286	7.07586	7.09038	0.0145242
'ACAD8'	'00120: Bile acid biosynthesis, 00624: 1- and 2-Methylnaphthalene degradation'	0.674797	7.03103	7.03236	0.00132521
'ACAD9'	'00120: Bile acid biosynthesis, 00624: 1- and 2-Methylnaphthalene degradation'	0.628299	7.09061	7.09055	-5.88327e-05
'ACADM'	'00071: Fatty acid metabolism, 00280: Valine, leucine and isoleucine degradation, 00410: beta-Alanine metabolism, 00640: Propanoate metabolism, 03320: PPAR signaling pathway'	0.00268598	6.86657	6.89862	0.0320554
'ACADVL'	'00071: Fatty acid metabolism'	0.00216862	7.03706	7.05796	0.0208952
'ACAT2'	'00071: Fatty acid metabolism, 00072: Synthesis and degradation of ketone bodies, 00280: Valine, leucine and isoleucine degradation, 00310: Lysine degradation, 00380: Tryptophan metabolism, 00620: Pyruvate metabolism, 00632: Benzoate degradation via CoA ligation, 00640: Propanoate metabolism, 00650: Butanoate metabolism'	0.628299	6.95488	6.95657	0.00169561
'ACHE'	'00564: Glycerophospholipid metabolism'	0.722572	7.03352	7.0254	-0.00811911
'ACLY'	'00020: Citrate cycle (TCA cycle), 00720: Reductive carboxylate cycle (CO2 fixation)'	0.0259496	6.96662	6.95027	-0.0163526
'ACO2'	'00020: Citrate cycle (TCA cycle), 00630: Glyoxylate and dicarboxylate metabolism, 00720: Reductive carboxylate cycle (CO2 fixation)'	0.0184697	6.85964	6.8815	0.0218628
'ACOT9'	'00632: Benzoate degradation via CoA ligation, 00903: Limonene and pinene degradation'	0.419741	7.02648	7.02372	-0.00276566
'ACOX1'	'00071: Fatty acid metabolism, 03320: PPAR signaling pathway'	0.035917	6.99701	7.01331	0.0162991
'ACOX3'	'00071: Fatty acid metabolism, 03320: PPAR signaling pathway'	0.165192	7.01129	7.01579	0.00450007
'ACP1'	'00361: gamma-Hexachlorocyclohexane degradation, 00740: Riboflavin metabolism, 04520: Adherens junction'	0.165192	7.03164	7.021	-0.0106449
'ACP2'	'00361: gamma-Hexachlorocyclohexane degradation, 00740: Riboflavin metabolism'	0.0658171	6.94355	6.95877	0.0152159
'ACP5'	'00361: gamma-Hexachlorocyclohexane degradation, 00740: Riboflavin metabolism'	0.383524	6.94812	6.95715	0.00903204
'ACP6'	'00361: gamma-Hexachlorocyclohexane degradation, 00740: Riboflavin metabolism'	0.008942	6.97515	6.95983	-0.015317
'ACPP'	'00361: gamma-Hexachlorocyclohexane degradation, 00740: Riboflavin metabolism'	0.0997601	7.04817	7.04195	-0.006227
'ACSL3'	'00071: Fatty acid metabolism, 03320: PPAR signaling pathway, 04920: Adipocytokine signaling pathway'	0.628299	7.02352	7.01641	-0.00710687
'ACSL4'	'00071: Fatty acid metabolism, 03320: PPAR signaling pathway, 04920: Adipocytokine signaling pathway'	0.129287	7.0426	7.03521	-0.00738641
'ACSL5'	'00071: Fatty acid metabolism, 03320: PPAR signaling pathway, 04920: Adipocytokine signaling pathway'	0.0154943	6.95903	6.97434	0.015308
'ACSS2'	'00010: Glycolysis / Gluconeogenesis, 00620: Pyruvate metabolism, 00640: Propanoate metabolism, 00720: Reductive carboxylate cycle (CO2 fixation)'	0.00407286	6.91437	6.94867	0.0343086
'ACTB'	'01430: Cell Communication, 04510: Focal adhesion, 04520: Adherens junction, 04530: Tight junction, 04670: Leukocyte transendothelial migration, 04810: Regulation of actin cytoskeleton, 05130: Pathogenic Escherichia coli infection - EHEC, 05131: Pathogenic Escherichia coli infection - EPEC'	0.0305861	7.22069	7.22929	0.00859734
'ACTC1'	'01430: Cell Communication, 04510: Focal adhesion, 04520: Adherens junction, 04530: Tight junction, 04670: Leukocyte transendothelial migration, 04810: Regulation of actin cytoskeleton, 05130: Pathogenic Escherichia coli infection - EHEC, 05131: Pathogenic Escherichia coli infection - EPEC'	0.286844	7.09588	7.10487	0.00899458
'ACTG1'	'01430: Cell Communication, 04510: Focal adhesion, 04520: Adherens junction, 04530: Tight junction, 04670: Leukocyte transendothelial migration, 04810: Regulation of actin cytoskeleton, 05110: Cholera - Infection, 05130: Pathogenic Escherichia coli infection - EHEC, 05131: Pathogenic Escherichia coli infection - EPEC'	0.0489799	6.98142	6.9994	0.0179785
'ACTG2'	'05110: Cholera - Infection'	0.497916	7.04561	7.03595	-0.00966234
'ACTN1'	'04510: Focal adhesion, 04520: Adherens junction, 04530: Tight junction, 04670: Leukocyte transendothelial migration, 04810: Regulation of actin cytoskeleton'	0.0997601	7.02438	7.00204	-0.0223329
'ACTN2'	'04510: Focal adhesion, 04520: Adherens junction, 04530: Tight junction, 04670: Leukocyte transendothelial migration, 04810: Regulation of actin cytoskeleton'	0.674797	7.08547	7.0862	0.000729619
'ACTN3'	'04510: Focal adhesion, 04520: Adherens junction, 04530: Tight junction, 04670: Leukocyte transendothelial migration, 04810: Regulation of actin cytoskeleton'	0.722572	7.06172	7.06807	0.00634731
'ACTN4'	'04510: Focal adhesion, 04520: Adherens junction, 04530: Tight junction, 04670: Leukocyte transendothelial migration, 04810: Regulation of actin cytoskeleton'	0.0420206	7.062	7.07057	0.00857536
'ACVR1'	'04060: Cytokine-cytokine receptor interaction, 04350: TGF-beta signaling pathway'	0.628299	7.05564	7.05205	-0.00359058
'ACVR1B'	'04010: MAPK signaling pathway, 04060: Cytokine-cytokine receptor interaction, 04350: TGF-beta signaling pathway, 04520: Adherens junction, 05210: Colorectal cancer, 05212: Pancreatic cancer, 05220: Chronic myeloid leukemia'	0.628299	7.02805	7.03072	0.00267654
'ACVR1C'	'04010: MAPK signaling pathway, 04350: TGF-beta signaling pathway, 04520: Adherens junction, 05210: Colorectal cancer, 05212: Pancreatic cancer, 05220: Chronic myeloid leukemia'	0.00139729	6.96339	7.00965	0.0462628
'ACVR2A'	'04060: Cytokine-cytokine receptor interaction, 04350: TGF-beta signaling pathway'	0.00498637	6.98823	7.00359	0.0153567
'ACVR2B'	'04060: Cytokine-cytokine receptor interaction, 04350: TGF-beta signaling pathway'	0.0420206	7.01262	7.01909	0.00647135
'ACVRL1'	'04350: TGF-beta signaling pathway'	0.0259496	6.95665	6.97896	0.0223136
'ADA'	'00230: Purine metabolism'	0.0154943	7.03413	7.02487	-0.00926105
'ADAM10'	'05120: Epithelial cell signaling in Helicobacter pylori infection'	0.113771	7.02545	7.03119	0.00573548
'ADAM17'	'04330: Notch signaling pathway, 05120: Epithelial cell signaling in Helicobacter pylori infection'	0.00608134	7.04063	7.03094	-0.00969081
'ADAR'	'00791: Atrazine degradation'	0.419741	6.88791	6.88952	0.00160873
'ADCY1'	'00230: Purine metabolism, 04020: Calcium signaling pathway, 04540: Gap junction, 04720: Long-term potentiation, 04912: GnRH signaling pathway, 04916: Melanogenesis'	0.419741	7.03878	7.03885	7.48817e-05
'ADCY2'	'00230: Purine metabolism, 04020: Calcium signaling pathway, 04540: Gap junction, 04912: GnRH signaling pathway, 04916: Melanogenesis'	0.258636	7.03946	7.04292	0.00345317
'ADCY3'	'00230: Purine metabolism, 04020: Calcium signaling pathway, 04540: Gap junction, 04740: Olfactory transduction, 04912: GnRH signaling pathway, 04916: Melanogenesis, 05110: Cholera - Infection'	0.113771	7.00049	6.99743	-0.00306153
'ADCY5'	'00230: Purine metabolism, 04540: Gap junction, 04912: GnRH signaling pathway, 04916: Melanogenesis'	1	7.04678	7.04342	-0.00335791
'ADCY6'	'00230: Purine metabolism, 04540: Gap junction, 04742: Taste transduction, 04912: GnRH signaling pathway, 04916: Melanogenesis'	0.00268598	6.9916	7.01133	0.0197337
'ADCY7'	'00230: Purine metabolism, 04020: Calcium signaling pathway, 04540: Gap junction, 04912: GnRH signaling pathway, 04916: Melanogenesis'	0.457892	7.0306	7.03254	0.00194679
'ADCYAP1'	'04080: Neuroactive ligand-receptor interaction'	0.674797	7.03474	7.03665	0.00191717
'ADCYAP1R1'	'04080: Neuroactive ligand-receptor interaction'	0.035917	7.02127	7.03174	0.0104709
'ADH5'	'00010: Glycolysis / Gluconeogenesis, 00071: Fatty acid metabolism, 00120: Bile acid biosynthesis, 00350: Tyrosine metabolism, 00561: Glycerolipid metabolism, 00624: 1- and 2-Methylnaphthalene degradation, 00680: Methane metabolism, 00980: Metabolism of xenobiotics by cytochrome P450'	0.0997601	6.90853	6.91898	0.0104526
'ADIPOQ'	'03320: PPAR signaling pathway, 04920: Adipocytokine signaling pathway, 04930: Type II diabetes mellitus'	0.208132	7.04506	7.04305	-0.00200665
'ADIPOR1'	'04920: Adipocytokine signaling pathway'	0.722572	6.942	6.94244	0.000438404
'ADIPOR2'	'04920: Adipocytokine signaling pathway'	0.0658171	6.89755	6.91591	0.0183594
'ADORA1'	'04080: Neuroactive ligand-receptor interaction'	0.821261	7.02675	7.02905	0.00230873
'ADORA2A'	'04020: Calcium signaling pathway, 04080: Neuroactive ligand-receptor interaction'	0.871799	7.0173	7.01638	-0.000925273
'ADORA2B'	'04020: Calcium signaling pathway, 04080: Neuroactive ligand-receptor interaction'	0.349288	7.02361	7.02572	0.00210409
'ADRA1A'	'04020: Calcium signaling pathway, 04080: Neuroactive ligand-receptor interaction'	0.232412	7.04736	7.04497	-0.00238741
'ADRA1B'	'04020: Calcium signaling pathway, 04080: Neuroactive ligand-receptor interaction'	0.722572	7.08783	7.0869	-0.000931162
'ADRA1D'	'04020: Calcium signaling pathway'	0.628299	7.04383	7.04449	0.000663363
'ADRA2A'	'04080: Neuroactive ligand-receptor interaction'	0.129287	6.97719	6.99602	0.0188288
'ADRA2B'	'04080: Neuroactive ligand-receptor interaction'	0.922866	7.02741	7.02615	-0.00126838
'ADRA2C'	'04080: Neuroactive ligand-receptor interaction'	0.129287	7.02172	7.01505	-0.00666969
'ADRB1'	'04020: Calcium signaling pathway, 04080: Neuroactive ligand-receptor interaction, 04540: Gap junction'	0.0420206	7.04862	7.04159	-0.00703669
'ADRB2'	'04020: Calcium signaling pathway, 04080: Neuroactive ligand-receptor interaction'	0.0305861	7.02954	7.04115	0.0116091
'ADRB3'	'04020: Calcium signaling pathway, 04080: Neuroactive ligand-receptor interaction'	0.58323	7.04575	7.04501	-0.000732191
'ADRBK2'	'04740: Olfactory transduction'	0.771454	7.02579	7.02573	-6.30463e-05
'ADSSL1'	'00230: Purine metabolism, 00252: Alanine and aspartate metabolism'	0.165192	7.01585	7.01774	0.00188827
'AGA'	'00511: N-Glycan degradation, 01032: Glycan structures - degradation'	0.58323	7.02736	7.0273	-6.15488e-05
'AGL'	'00500: Starch and sucrose metabolism'	0.0184697	6.93588	6.95038	0.0145039
'AGPAT1'	'00561: Glycerolipid metabolism, 00564: Glycerophospholipid metabolism, 00565: Ether lipid metabolism'	0.674797	7.01398	7.01387	-0.00011258
'AGPAT4'	'00561: Glycerolipid metabolism, 00564: Glycerophospholipid metabolism, 00565: Ether lipid metabolism'	0.056882	7.03672	7.02491	-0.0118127
'AGPS'	'00565: Ether lipid metabolism'	0.146399	7.04551	7.0389	-0.00661414
'AGRN'	'04512: ECM-receptor interaction'	0.00216862	7.00952	7.00018	-0.00933699
'AGRP'	'04080: Neuroactive ligand-receptor interaction, 04920: Adipocytokine signaling pathway'	0.146399	7.04826	7.04043	-0.00783268
'AGTR1'	'04020: Calcium signaling pathway, 04080: Neuroactive ligand-receptor interaction'	0.974253	7.04891	7.04783	-0.00107917
'AGTR2'	'04080: Neuroactive ligand-receptor interaction'	0.457892	7.04561	7.0417	-0.00390285
'AGXT'	'00252: Alanine and aspartate metabolism, 00260: Glycine, serine and threonine metabolism'	0.208132	7.03347	7.03729	0.00381836
'AHCY'	'00271: Methionine metabolism, 00450: Selenoamino acid metabolism'	0.539729	6.91582	6.90201	-0.0138168
'AHCYL1'	'00271: Methionine metabolism, 00450: Selenoamino acid metabolism'	0.628299	6.91841	6.91688	-0.00152655
'AICDA'	'00240: Pyrimidine metabolism'	0.383524	7.04446	7.04067	-0.00379571
'AIFM1'	'04210: Apoptosis'	0.349288	7.06496	7.06977	0.0048163
'AK5'	'00230: Purine metabolism'	0.674797	7.04122	7.03803	-0.00319498
'AKR1B1'	'00040: Pentose and glucuronate interconversions, 00051: Fructose and mannose metabolism, 00052: Galactose metabolism, 00561: Glycerolipid metabolism, 00620: Pyruvate metabolism'	0.821261	6.92801	6.9294	0.00138974
'AKR1B10'	'00051: Fructose and mannose metabolism, 00052: Galactose metabolism, 00053: Ascorbate and aldarate metabolism, 00120: Bile acid biosynthesis, 00260: Glycine, serine and threonine metabolism, 00310: Lysine degradation, 00363: Bisphenol A degradation, 00520: Nucleotide sugars metabolism, 00591: Linoleic acid metabolism, 00625: Tetrachloroethene degradation, 00650: Butanoate metabolism'	0.000205946	6.85454	6.92471	0.0701683
'AKT1'	'04010: MAPK signaling pathway, 04150: mTOR signaling pathway, 04210: Apoptosis, 04370: VEGF signaling pathway, 04510: Focal adhesion, 04530: Tight junction, 04620: Toll-like receptor signaling pathway, 04630: Jak-STAT signaling pathway, 04660: T cell receptor signaling pathway, 04662: B cell receptor signaling pathway, 04664: Fc epsilon RI signaling pathway, 04910: Insulin signaling pathway, 049…	0.185746	7.1617	7.16527	0.00357733
'AKT2'	'04010: MAPK signaling pathway, 04150: mTOR signaling pathway, 04210: Apoptosis, 04370: VEGF signaling pathway, 04510: Focal adhesion, 04530: Tight junction, 04620: Toll-like receptor signaling pathway, 04630: Jak-STAT signaling pathway, 04660: T cell receptor signaling pathway, 04662: B cell receptor signaling pathway, 04664: Fc epsilon RI signaling pathway, 04910: Insulin signaling pathway, 049…	0.58323	7.04055	7.03962	-0.000929087
'AKT3'	'04010: MAPK signaling pathway, 04150: mTOR signaling pathway, 04210: Apoptosis, 04370: VEGF signaling pathway, 04510: Focal adhesion, 04530: Tight junction, 04620: Toll-like receptor signaling pathway, 04630: Jak-STAT signaling pathway, 04660: T cell receptor signaling pathway, 04662: B cell receptor signaling pathway, 04664: Fc epsilon RI signaling pathway, 04910: Insulin signaling pathway, 049…	0.922866	7.02993	7.03063	0.00069627
'ALAS1'	'00260: Glycine, serine and threonine metabolism, 00860: Porphyrin and chlorophyll metabolism'	0.922866	6.92168	6.92222	0.000547774
'ALAS2'	'00260: Glycine, serine and threonine metabolism, 00860: Porphyrin and chlorophyll metabolism'	0.232412	7.04521	7.04122	-0.00399002
'ALCAM'	'04514: Cell adhesion molecules (CAMs)'	0.113771	7.03787	7.03084	-0.00703423
'ALDH18A1'	'00220: Urea cycle and metabolism of amino groups'	0.00738835	6.96588	6.97953	0.0136561
'ALDH1A1'	'00830: Retinol metabolism'	0.419741	6.92339	6.9292	0.00580499
'ALDH1B1'	'00010: Glycolysis / Gluconeogenesis, 00053: Ascorbate and aldarate metabolism, 00071: Fatty acid metabolism, 00120: Bile acid biosynthesis, 00220: Urea cycle and metabolism of amino groups, 00280: Valine, leucine and isoleucine degradation, 00310: Lysine degradation, 00340: Histidine metabolism, 00380: Tryptophan metabolism, 00410: beta-Alanine metabolism, 00561: Glycerolipid metabolism, 00620: …	0.129287	7.11487	7.11092	-0.00395746
'ALDH2'	'00010: Glycolysis / Gluconeogenesis, 00053: Ascorbate and aldarate metabolism, 00071: Fatty acid metabolism, 00120: Bile acid biosynthesis, 00220: Urea cycle and metabolism of amino groups, 00280: Valine, leucine and isoleucine degradation, 00310: Lysine degradation, 00340: Histidine metabolism, 00380: Tryptophan metabolism, 00410: beta-Alanine metabolism, 00561: Glycerolipid metabolism, 00620: …	0.056882	6.93206	6.94312	0.0110539
'ALDH5A1'	'00251: Glutamate metabolism, 00650: Butanoate metabolism'	0.286844	7.01234	7.02181	0.00946758
'ALDH9A1'	'00010: Glycolysis / Gluconeogenesis, 00053: Ascorbate and aldarate metabolism, 00071: Fatty acid metabolism, 00120: Bile acid biosynthesis, 00220: Urea cycle and metabolism of amino groups, 00280: Valine, leucine and isoleucine degradation, 00310: Lysine degradation, 00340: Histidine metabolism, 00380: Tryptophan metabolism, 00410: beta-Alanine metabolism, 00561: Glycerolipid metabolism, 00620: …	0.0658171	6.89316	6.90316	0.00999763
'ALDOA'	'00010: Glycolysis / Gluconeogenesis, 00030: Pentose phosphate pathway, 00051: Fructose and mannose metabolism, 00710: Carbon fixation'	0.129287	6.97984	6.99298	0.0131428
'ALDOB'	'00010: Glycolysis / Gluconeogenesis, 00030: Pentose phosphate pathway, 00051: Fructose and mannose metabolism, 00710: Carbon fixation'	0.0184697	7.03765	7.01725	-0.0203943
'ALDOC'	'00010: Glycolysis / Gluconeogenesis, 00030: Pentose phosphate pathway, 00051: Fructose and mannose metabolism, 00710: Carbon fixation'	0.922866	6.97476	6.98363	0.00886822
'ALG13'	'00510: N-Glycan biosynthesis, 01030: Glycan structures - biosynthesis 1'	0.674797	6.96637	6.96358	-0.00278402
'ALOX12'	'00590: Arachidonic acid metabolism'	0.821261	7.03564	7.03791	0.00226754
'ALOX12B'	'00590: Arachidonic acid metabolism'	0.349288	7.05257	7.04943	-0.0031431
'ALOX15'	'00590: Arachidonic acid metabolism, 00591: Linoleic acid metabolism'	0.208132	7.0463	7.03531	-0.0109888
'ALOX5'	'00590: Arachidonic acid metabolism, 00591: Linoleic acid metabolism'	0.497916	7.02963	7.03203	0.00240756
'ALPL'	'00361: gamma-Hexachlorocyclohexane degradation, 00790: Folate biosynthesis'	0.00738835	7.03611	7.02574	-0.0103728
'ALPP'	'00361: gamma-Hexachlorocyclohexane degradation, 00790: Folate biosynthesis'	0.628299	7.06859	7.06486	-0.00373001
'ALPPL2'	'00361: gamma-Hexachlorocyclohexane degradation, 00790: Folate biosynthesis'	0.383524	7.01758	7.0164	-0.00118473
'ALS2'	'01510: Neurodegenerative Disorders, 05030: Amyotrophic lateral sclerosis (ALS)'	0.497916	7.03932	7.0364	-0.00292376
'AMFR'	'00380: Tryptophan metabolism'	0.539729	6.98935	6.99456	0.00521137
'AMH'	'04060: Cytokine-cytokine receptor interaction, 04350: TGF-beta signaling pathway'	0.821261	7.04158	7.03893	-0.00264944
'AMHR2'	'04060: Cytokine-cytokine receptor interaction, 04350: TGF-beta signaling pathway'	0.185746	7.04697	7.04184	-0.00512815
'AMOTL1'	'04530: Tight junction'	0.871799	7.04703	7.04793	0.000896767
'AMPD3'	'00230: Purine metabolism'	0.722572	7.06835	7.06777	-0.000574267
'ANAPC1'	'04110: Cell cycle, 04120: Ubiquitin mediated proteolysis'	0.208132	7.16553	7.16395	-0.0015733
'ANAPC10'	'04110: Cell cycle, 04120: Ubiquitin mediated proteolysis'	0.0305861	7.08933	7.08416	-0.00517852
'ANAPC11'	'04110: Cell cycle, 04120: Ubiquitin mediated proteolysis'	0.349288	7.0568	7.05031	-0.00649279
'ANAPC2'	'04110: Cell cycle, 04120: Ubiquitin mediated proteolysis'	0.258636	7.12168	7.12793	0.00624392
'ANAPC4'	'04110: Cell cycle, 04120: Ubiquitin mediated proteolysis'	0.286844	7.02412	7.02827	0.00414184
'ANAPC5'	'04110: Cell cycle, 04120: Ubiquitin mediated proteolysis'	0.232412	7.0227	7.02471	0.00200957
'ANAPC7'	'04110: Cell cycle, 04120: Ubiquitin mediated proteolysis'	0.922866	7.13423	7.13513	0.000897726
'ANGPTL4'	'03320: PPAR signaling pathway'	0.0259496	7.0415	7.02626	-0.0152398
'ANPEP'	'00480: Glutathione metabolism, 04640: Hematopoietic cell lineage'	0.497916	7.04491	7.04324	-0.00166926
'AOC3'	'00220: Urea cycle and metabolism of amino groups, 00260: Glycine, serine and threonine metabolism, 00340: Histidine metabolism, 00350: Tyrosine metabolism, 00360: Phenylalanine metabolism, 00380: Tryptophan metabolism, 00410: beta-Alanine metabolism, 00960: Alkaloid biosynthesis II'	0.0658171	6.96885	6.98298	0.0141288
'AOX1'	'00280: Valine, leucine and isoleucine degradation, 00350: Tyrosine metabolism, 00380: Tryptophan metabolism, 00750: Vitamin B6 metabolism, 00760: Nicotinate and nicotinamide metabolism'	0.821261	7.02936	7.02671	-0.00264453
'APAF1'	'04210: Apoptosis'	0.232412	7.052	7.04011	-0.0118931
'APBA1'	'01510: Neurodegenerative Disorders'	1	7.04226	7.03883	-0.00343526
'APBB1'	'05010: Alzheimer''s disease'	0.0154943	7.0752	7.05966	-0.0155422
'APC'	'04310: Wnt signaling pathway, 04810: Regulation of actin cytoskeleton, 05210: Colorectal cancer, 05217: Basal cell carcinoma'	0.113771	7.07245	7.08173	0.0092712
'APC2'	'04310: Wnt signaling pathway, 04810: Regulation of actin cytoskeleton, 05210: Colorectal cancer, 05217: Basal cell carcinoma'	1	7.05032	7.04988	-0.000441957
'APH1A'	'04330: Notch signaling pathway, 05010: Alzheimer''s disease'	0.0997601	6.96731	6.97224	0.00493141
'APLP1'	'01510: Neurodegenerative Disorders, 05060: Prion disease'	0.087161	7.05469	7.05015	-0.0045381
'APOA1'	'03320: PPAR signaling pathway'	0.722572	7.10146	7.10347	0.00200885
'APOA2'	'03320: PPAR signaling pathway'	0.0658171	7.08367	7.07185	-0.0118246
'APOA5'	'03320: PPAR signaling pathway'	0.58323	7.0399	7.03784	-0.00206473
'APOBEC1'	'00791: Atrazine degradation'	0.383524	7.00948	6.99841	-0.0110653
'APOBEC2'	'00791: Atrazine degradation'	0.146399	7.02371	7.02677	0.003057
'APOBEC3G'	'00791: Atrazine degradation'	0.58323	7.02702	7.02937	0.00235231
'APOC3'	'03320: PPAR signaling pathway'	0.771454	7.09007	7.09322	0.00315319
'APOE'	'01510: Neurodegenerative Disorders, 05010: Alzheimer''s disease'	0.0997601	7.0004	7.01653	0.0161296
'APP'	'01510: Neurodegenerative Disorders, 05010: Alzheimer''s disease'	0.628299	6.99431	6.99225	-0.00205926
'APPL1'	'05210: Colorectal cancer'	0.0305861	6.9692	6.98559	0.016389
'APRT'	'00230: Purine metabolism'	0.539729	6.93823	6.93448	-0.00374164
'ARAF'	'04650: Natural killer cell mediated cytotoxicity, 04720: Long-term potentiation, 04730: Long-term depression, 04810: Regulation of actin cytoskeleton, 04910: Insulin signaling pathway, 05210: Colorectal cancer, 05212: Pancreatic cancer, 05214: Glioma, 05218: Melanoma, 05220: Chronic myeloid leukemia'	0.035917	7.03118	7.01672	-0.0144643
'ARF3'	'05110: Cholera - Infection'	0.056882	6.97598	6.98337	0.0073922
'ARF4'	'05110: Cholera - Infection'	0.232412	7.08332	7.08962	0.00629781
'ARG1'	'00220: Urea cycle and metabolism of amino groups, 00330: Arginine and proline metabolism'	0.383524	7.12598	7.12322	-0.00276005
'ARG2'	'00220: Urea cycle and metabolism of amino groups, 00330: Arginine and proline metabolism'	0.035917	7.02736	7.01329	-0.0140655
'ARHGAP5'	'04510: Focal adhesion, 04670: Leukocyte transendothelial migration'	0.232412	6.99347	7.0064	0.0129208
'ARHGEF1'	'04810: Regulation of actin cytoskeleton'	0.0420206	7.14925	7.15936	0.0101129
'ARHGEF12'	'04360: Axon guidance, 04810: Regulation of actin cytoskeleton'	0.722572	7.04882	7.04693	-0.00188794
'ARHGEF2'	'05130: Pathogenic Escherichia coli infection - EHEC, 05131: Pathogenic Escherichia coli infection - EPEC'	0.056882	7.15647	7.16254	0.00606348
'ARHGEF4'	'04810: Regulation of actin cytoskeleton'	0.087161	7.07059	7.06543	-0.00516126
'ARHGEF6'	'04810: Regulation of actin cytoskeleton, 05212: Pancreatic cancer'	0.0997601	6.99936	7.00596	0.00659957
'ARHGEF7'	'04810: Regulation of actin cytoskeleton'	0.113771	7.04866	7.05481	0.0061511
'ARL4D'	'05110: Cholera - Infection'	0.674797	7.03483	7.03843	0.00359983
'ARNTL'	'04710: Circadian rhythm'	0.821261	7.02424	7.0237	-0.000548787
'ARPC1B'	'04810: Regulation of actin cytoskeleton'	0.722572	7.02475	7.02865	0.00389841
'ARPC2'	'04810: Regulation of actin cytoskeleton'	0.0420206	6.85524	6.87653	0.0212912
'ARPC3'	'04810: Regulation of actin cytoskeleton'	0.974253	7.02368	7.02153	-0.00215081
'ARPC5'	'04810: Regulation of actin cytoskeleton, 05130: Pathogenic Escherichia coli infection - EHEC, 05131: Pathogenic Escherichia coli infection - EPEC'	0.0219336	6.97332	6.98579	0.0124672
'ARRB1'	'04010: MAPK signaling pathway'	0.0219336	7.04606	7.05327	0.00721795
'ARRB2'	'04010: MAPK signaling pathway, 04740: Olfactory transduction'	0.0489799	7.02087	7.03086	0.00998564
'ARSA'	'00600: Sphingolipid metabolism'	0.722572	6.99201	6.98808	-0.00392556
'ARSB'	'00531: Glycosaminoglycan degradation, 01032: Glycan structures - degradation'	0.722572	7.04216	7.04106	-0.00110728
'ARSE'	'00150: Androgen and estrogen metabolism, 00600: Sphingolipid metabolism'	0.539729	6.95493	6.9588	0.00387068
'ASAH1'	'00600: Sphingolipid metabolism'	0.674797	6.93745	6.941	0.00355527
'ASCC3'	'00500: Starch and sucrose metabolism, 00790: Folate biosynthesis'	0.008942	7.00972	6.99875	-0.0109694
'ASH1L'	'04530: Tight junction'	0.539729	6.98756	6.98928	0.0017231
'ASIP'	'04916: Melanogenesis'	0.208132	7.04778	7.04574	-0.00203918
'ASL'	'00220: Urea cycle and metabolism of amino groups, 00252: Alanine and aspartate metabolism, 00330: Arginine and proline metabolism'	0.165192	6.90066	6.90389	0.00322849
'ASNS'	'00252: Alanine and aspartate metabolism, 00910: Nitrogen metabolism'	0.922866	7.03919	7.03649	-0.00270393
'ASS1'	'00220: Urea cycle and metabolism of amino groups, 00252: Alanine and aspartate metabolism, 00330: Arginine and proline metabolism'	0.035917	6.95403	6.94217	-0.0118622
'ATF2'	'04010: MAPK signaling pathway'	0.208132	7.05274	7.04472	-0.00801167
'ATF4'	'04010: MAPK signaling pathway, 04720: Long-term potentiation, 04912: GnRH signaling pathway'	0.922866	6.88633	6.88728	0.000953358
'ATG12'	'04140: Regulation of autophagy'	0.722572	7.01935	7.01314	-0.00621368
'ATG3'	'04140: Regulation of autophagy'	0.0489799	6.97176	6.98085	0.00909246
'ATG5'	'04140: Regulation of autophagy'	0.208132	6.984	6.98724	0.00324518
'ATG7'	'04140: Regulation of autophagy'	0.821261	7.03001	7.03045	0.000437679
'ATIC'	'00230: Purine metabolism, 00670: One carbon pool by folate'	0.185746	6.93053	6.91709	-0.0134499
'ATM'	'04110: Cell cycle, 04210: Apoptosis'	0.821261	7.24698	7.24673	-0.000246524
'ATN1'	'01510: Neurodegenerative Disorders, 05050: Dentatorubropallidoluysian atrophy (DRPLA)'	0.208132	7.03009	7.03262	0.00253697
'ATP2A1'	'04020: Calcium signaling pathway'	0.232412	7.04207	7.03811	-0.003959
'ATP2A2'	'04020: Calcium signaling pathway'	0.419741	6.96809	6.97089	0.00279797
'ATP2A3'	'04020: Calcium signaling pathway'	0.165192	6.96831	6.99205	0.0237358
'ATP2B1'	'04020: Calcium signaling pathway'	0.00498637	6.92912	6.94671	0.0175897
'ATP2B2'	'04020: Calcium signaling pathway'	0.383524	7.04563	7.04349	-0.00214503
'ATP2B3'	'04020: Calcium signaling pathway'	0.317059	7.0445	7.0421	-0.00239209
'ATP2B4'	'04020: Calcium signaling pathway'	0.232412	6.97053	6.96316	-0.00737
'ATP4B'	'00190: Oxidative phosphorylation'	0.113771	7.04643	7.04132	-0.0051081
'ATP5A1'	'00190: Oxidative phosphorylation'	0.165192	7.15546	7.16908	0.0136256
'ATP5B'	'00190: Oxidative phosphorylation'	0.056882	7.00333	7.01785	0.0145227
'ATP5C1'	'00190: Oxidative phosphorylation'	0.0658171	6.97763	6.98948	0.0118556
'ATP5D'	'00190: Oxidative phosphorylation'	0.258636	6.94078	6.95343	0.0126524
'ATP5E'	'00190: Oxidative phosphorylation'	0.922866	6.91349	6.92042	0.00692815
'ATP5F1'	'00190: Oxidative phosphorylation'	0.0154943	7.02874	7.04178	0.0130401
'ATP5G1'	'00190: Oxidative phosphorylation'	0.0219336	6.91269	6.92714	0.0144439
'ATP5H'	'00190: Oxidative phosphorylation'	0.0154943	6.99657	7.00615	0.00958352
'ATP5I'	'00190: Oxidative phosphorylation'	0.0420206	6.88478	6.90278	0.0179987
'ATP5J'	'00190: Oxidative phosphorylation'	0.0489799	6.95115	6.96433	0.01318
'ATP5J2'	'00190: Oxidative phosphorylation'	0.974253	7.03284	7.03532	0.00247604
'ATP5L'	'00190: Oxidative phosphorylation'	0.0259496	6.94256	6.95319	0.0106306
'ATP5O'	'00190: Oxidative phosphorylation'	0.0107811	7.02846	7.04403	0.0155623
'ATP6V0A1'	'00190: Oxidative phosphorylation, 05110: Cholera - Infection, 05120: Epithelial cell signaling in Helicobacter pylori infection'	0.497916	7.02565	7.02255	-0.00309199
'ATP6V0A2'	'00190: Oxidative phosphorylation, 05110: Cholera - Infection, 05120: Epithelial cell signaling in Helicobacter pylori infection'	0.419741	7.03766	7.03515	-0.0025049
'ATP6V0A4'	'00190: Oxidative phosphorylation, 05110: Cholera - Infection, 05120: Epithelial cell signaling in Helicobacter pylori infection'	0.821261	7.03522	7.03801	0.00278768
'ATP6V0B'	'00190: Oxidative phosphorylation, 05110: Cholera - Infection, 05120: Epithelial cell signaling in Helicobacter pylori infection'	0.349288	6.89181	6.90314	0.0113313
'ATP6V0C'	'00190: Oxidative phosphorylation, 05110: Cholera - Infection, 05120: Epithelial cell signaling in Helicobacter pylori infection'	0.628299	6.91856	6.92258	0.00401606
'ATP6V0D1'	'00190: Oxidative phosphorylation, 05110: Cholera - Infection, 05120: Epithelial cell signaling in Helicobacter pylori infection'	0.00407286	6.96907	6.98715	0.0180792
'ATP6V0E1'	'00190: Oxidative phosphorylation, 05110: Cholera - Infection, 05120: Epithelial cell signaling in Helicobacter pylori infection'	0.771454	6.99913	6.99868	-0.000448581
'ATP6V1A'	'00190: Oxidative phosphorylation, 05110: Cholera - Infection, 05120: Epithelial cell signaling in Helicobacter pylori infection'	0.383524	6.9766	6.97445	-0.00215166
'ATP6V1B1'	'00190: Oxidative phosphorylation, 05120: Epithelial cell signaling in Helicobacter pylori infection'	0.871799	7.0363	7.03733	0.00103123
'ATP6V1B2'	'00190: Oxidative phosphorylation, 05120: Epithelial cell signaling in Helicobacter pylori infection'	0.539729	6.96665	6.96478	-0.00186974
'ATP6V1C1'	'00190: Oxidative phosphorylation, 05110: Cholera - Infection, 05120: Epithelial cell signaling in Helicobacter pylori infection'	0.087161	6.99182	6.98936	-0.00246245
'ATP6V1D'	'00190: Oxidative phosphorylation, 05110: Cholera - Infection, 05120: Epithelial cell signaling in Helicobacter pylori infection'	0.0184697	7.06515	7.07602	0.0108734
'ATP6V1E1'	'00190: Oxidative phosphorylation, 05110: Cholera - Infection, 05120: Epithelial cell signaling in Helicobacter pylori infection'	0.129287	6.95559	6.96053	0.00494008
'ATP6V1F'	'00190: Oxidative phosphorylation, 05110: Cholera - Infection, 05120: Epithelial cell signaling in Helicobacter pylori infection'	0.922866	6.97123	6.975	0.00376686
'ATP6V1G1'	'00190: Oxidative phosphorylation, 05110: Cholera - Infection, 05120: Epithelial cell signaling in Helicobacter pylori infection'	0.628299	6.96091	6.96238	0.00146134
'ATP6V1G2'	'00190: Oxidative phosphorylation, 05110: Cholera - Infection, 05120: Epithelial cell signaling in Helicobacter pylori infection'	0.58323	7.09239	7.0937	0.00130998
'ATP6V1H'	'00190: Oxidative phosphorylation, 05110: Cholera - Infection, 05120: Epithelial cell signaling in Helicobacter pylori infection'	0.0259496	7.01923	7.0294	0.0101707
'ATR'	'04110: Cell cycle'	0.00498637	7.15648	7.14393	-0.0125511
'AVP'	'04080: Neuroactive ligand-receptor interaction'	0.0305861	7.05223	7.04578	-0.00644889
'AVPR1A'	'04020: Calcium signaling pathway, 04080: Neuroactive ligand-receptor interaction'	0.317059	7.04248	7.04211	-0.000368088
'AVPR1B'	'04020: Calcium signaling pathway, 04080: Neuroactive ligand-receptor interaction'	0.58323	7.0405	7.03854	-0.00196211
'AVPR2'	'04080: Neuroactive ligand-receptor interaction'	0.383524	7.05102	7.0503	-0.000724228
'AXIN1'	'04310: Wnt signaling pathway, 05210: Colorectal cancer, 05217: Basal cell carcinoma'	0.208132	7.05156	7.05816	0.00660028
'AXIN2'	'04310: Wnt signaling pathway, 05210: Colorectal cancer, 05217: Basal cell carcinoma'	0.056882	7.03298	7.02396	-0.00901401
'B2M'	'04612: Antigen processing and presentation'	0.0489799	6.89105	6.91124	0.0201935
'B3GAT3'	'00532: Chondroitin sulfate biosynthesis, 01030: Glycan structures - biosynthesis 1'	0.419741	7.07327	7.07489	0.00161672
'B4GALT1'	'00052: Galactose metabolism, 00510: N-Glycan biosynthesis, 00533: Keratan sulfate biosynthesis, 00602: Glycosphingolipid biosynthesis - neo-lactoseries, 01030: Glycan structures - biosynthesis 1, 01031: Glycan structures - biosynthesis 2'	0.0420206	7.01747	7.02137	0.00390911
'B4GALT3'	'00510: N-Glycan biosynthesis, 00533: Keratan sulfate biosynthesis, 00602: Glycosphingolipid biosynthesis - neo-lactoseries, 01030: Glycan structures - biosynthesis 1, 01031: Glycan structures - biosynthesis 2'	0.232412	6.95724	6.95242	-0.00482157
'BACE1'	'05010: Alzheimer''s disease'	0.419741	7.01123	7.00549	-0.00573549
'BAD'	'01510: Neurodegenerative Disorders, 04210: Apoptosis, 04370: VEGF signaling pathway, 04510: Focal adhesion, 04910: Insulin signaling pathway, 05030: Amyotrophic lateral sclerosis (ALS), 05210: Colorectal cancer, 05212: Pancreatic cancer, 05218: Melanoma, 05220: Chronic myeloid leukemia'	0.00608134	7.00971	7.02334	0.0136325
'BAIAP2'	'04520: Adherens junction, 04810: Regulation of actin cytoskeleton, 05050: Dentatorubropallidoluysian atrophy (DRPLA)'	0.317059	7.05108	7.04789	-0.00318642
'BAX'	'01510: Neurodegenerative Disorders, 04210: Apoptosis, 05030: Amyotrophic lateral sclerosis (ALS), 05040: Huntington''s disease, 05210: Colorectal cancer'	0.58323	7.00658	7.00666	8.60668e-05
'BCAR1'	'04510: Focal adhesion, 04670: Leukocyte transendothelial migration, 04810: Regulation of actin cytoskeleton'	0.232412	7.08098	7.0831	0.00212801
'BCAT1'	'00280: Valine, leucine and isoleucine degradation, 00290: Valine, leucine and isoleucine biosynthesis, 00770: Pantothenate and CoA biosynthesis'	0.00174413	7.03432	7.0222	-0.0121256
'BCKDHA'	'00280: Valine, leucine and isoleucine degradation'	0.871799	7.03553	7.03599	0.000461462
'BCKDHB'	'00280: Valine, leucine and isoleucine degradation'	0.286844	6.99632	7.0054	0.00907818
'BCL10'	'04660: T cell receptor signaling pathway, 04662: B cell receptor signaling pathway'	0.185746	7.03863	7.04045	0.00182548
'BCL2'	'01510: Neurodegenerative Disorders, 04210: Apoptosis, 04510: Focal adhesion, 05030: Amyotrophic lateral sclerosis (ALS), 05060: Prion disease, 05210: Colorectal cancer'	0.113771	7.07517	7.08133	0.00615528
'BCL2L1'	'01510: Neurodegenerative Disorders, 04210: Apoptosis, 04630: Jak-STAT signaling pathway, 05030: Amyotrophic lateral sclerosis (ALS), 05212: Pancreatic cancer, 05220: Chronic myeloid leukemia'	0.317059	7.03384	7.03085	-0.00298638
'BCMO1'	'00830: Retinol metabolism'	0.258636	7.09344	7.09501	0.00157238
'BDH1'	'00072: Synthesis and degradation of ketone bodies, 00650: Butanoate metabolism'	0.087161	7.0261	7.03437	0.00826863
'BDKRB1'	'04020: Calcium signaling pathway, 04080: Neuroactive ligand-receptor interaction, 04610: Complement and coagulation cascades, 04810: Regulation of actin cytoskeleton'	0.113771	7.00798	7.01428	0.00629337
'BDKRB2'	'04020: Calcium signaling pathway, 04080: Neuroactive ligand-receptor interaction, 04610: Complement and coagulation cascades, 04810: Regulation of actin cytoskeleton'	0.165192	6.96477	6.97875	0.0139794
'BDNF'	'04010: MAPK signaling pathway, 05040: Huntington''s disease'	0.349288	7.06005	7.05696	-0.00308787
'BECN1'	'04140: Regulation of autophagy'	0.185746	6.93199	6.93951	0.00751964
'BET1'	'04130: SNARE interactions in vesicular transport'	0.129287	6.99296	6.99867	0.00570725
'BET1L'	'04130: SNARE interactions in vesicular transport'	0.146399	6.99613	6.99308	-0.00304331
'BID'	'04210: Apoptosis, 04650: Natural killer cell mediated cytotoxicity'	0.349288	7.11926	7.11701	-0.00225224
'BIRC2'	'04210: Apoptosis, 04510: Focal adhesion'	0.00738835	6.93087	6.95072	0.0198478
'BIRC3'	'04210: Apoptosis, 04510: Focal adhesion'	0.419741	7.01934	7.01989	0.000555408
'BIRC5'	'05210: Colorectal cancer'	0.129287	7.02904	7.02309	-0.00595713
'BLNK'	'04662: B cell receptor signaling pathway'	0.056882	7.00276	7.01759	0.0148287
'BLVRA'	'00860: Porphyrin and chlorophyll metabolism'	0.0997601	7.03696	7.02776	-0.00919744
'BLVRB'	'00860: Porphyrin and chlorophyll metabolism'	0.0997601	6.93311	6.94599	0.0128837
'BMP2'	'04060: Cytokine-cytokine receptor interaction, 04340: Hedgehog signaling pathway, 04350: TGF-beta signaling pathway, 05217: Basal cell carcinoma'	0.00111506	6.95536	6.97713	0.0217679
'BMP4'	'04340: Hedgehog signaling pathway, 04350: TGF-beta signaling pathway, 05217: Basal cell carcinoma'	0.722572	7.00827	7.01338	0.00510917
'BMP5'	'04340: Hedgehog signaling pathway, 04350: TGF-beta signaling pathway'	0.000886374	6.99537	7.02182	0.0264525
'BMP6'	'04340: Hedgehog signaling pathway, 04350: TGF-beta signaling pathway'	1	7.04745	7.04256	-0.00488814
'BMP7'	'04060: Cytokine-cytokine receptor interaction, 04340: Hedgehog signaling pathway, 04350: TGF-beta signaling pathway'	0.000553547	7.03683	7.02804	-0.00878602
'BMP8B'	'04340: Hedgehog signaling pathway, 04350: TGF-beta signaling pathway'	0.208132	7.04301	7.03779	-0.00522462
'BMPR1A'	'04060: Cytokine-cytokine receptor interaction, 04350: TGF-beta signaling pathway'	0.628299	6.98544	6.98369	-0.00175508
'BMPR1B'	'04060: Cytokine-cytokine receptor interaction, 04350: TGF-beta signaling pathway'	0.457892	7.06902	7.06727	-0.00174589
'BMPR2'	'04060: Cytokine-cytokine receptor interaction, 04350: TGF-beta signaling pathway'	0.457892	7.04657	7.04496	-0.00161127
'BNIP1'	'04130: SNARE interactions in vesicular transport'	0.771454	7.01128	7.01186	0.000582364
'BPGM'	'00010: Glycolysis / Gluconeogenesis'	0.539729	7.02106	7.01969	-0.00137317
'BPNT1'	'00920: Sulfur metabolism'	0.087161	7.10052	7.10886	0.00834848
'BRAP'	'00380: Tryptophan metabolism'	0.113771	7.01	7.01624	0.00624161
'BRCA2'	'05212: Pancreatic cancer'	0.0107811	7.0479	7.03758	-0.010321
'BST1'	'00760: Nicotinate and nicotinamide metabolism, 04020: Calcium signaling pathway'	0.0489799	7.01865	7.02618	0.00753314
'BTK'	'04662: B cell receptor signaling pathway, 04664: Fc epsilon RI signaling pathway'	0.628299	7.07984	7.08004	0.000203842
'BTRC'	'04120: Ubiquitin mediated proteolysis, 04310: Wnt signaling pathway, 04340: Hedgehog signaling pathway'	0.497916	7.07666	7.07586	-0.000793687
'BUB1'	'04110: Cell cycle'	0.0305861	7.24195	7.23865	-0.00330134
'BUB1B'	'04110: Cell cycle'	0.258636	7.14116	7.12674	-0.014422
'BUB3'	'04110: Cell cycle'	0.58323	7.10224	7.09522	-0.00702528
'Bcr'	'05220: Chronic myeloid leukemia'	0.674797	6.99819	6.99643	-0.00175264
'C1QA'	'04610: Complement and coagulation cascades, 05010: Alzheimer''s disease'	0.00174413	6.91453	6.94977	0.0352397
'C1QB'	'04610: Complement and coagulation cascades, 05010: Alzheimer''s disease'	0.0107811	6.91377	6.93914	0.0253683
'C1QC'	'04610: Complement and coagulation cascades, 05010: Alzheimer''s disease'	0.000205946	6.89047	6.91133	0.0208618
'C1R'	'04610: Complement and coagulation cascades'	0.0305861	6.94309	6.93025	-0.0128389
'C1S'	'04610: Complement and coagulation cascades'	0.165192	6.97061	6.95087	-0.0197436
'C2'	'04610: Complement and coagulation cascades'	0.056882	7.02053	7.01405	-0.00647797
'C3'	'04610: Complement and coagulation cascades'	0.208132	6.99506	6.98243	-0.0126234
'C3AR1'	'04080: Neuroactive ligand-receptor interaction, 04610: Complement and coagulation cascades'	0.258636	6.98792	6.99151	0.00359021
'C4A'	'04610: Complement and coagulation cascades'	0.0305861	7.06875	7.05249	-0.0162521
'C4BPA'	'04610: Complement and coagulation cascades'	0.00738835	7.02548	6.99363	-0.0318419
'C4BPB'	'04610: Complement and coagulation cascades'	0.146399	7.04183	7.03667	-0.00515424
'C5'	'04610: Complement and coagulation cascades'	0.165192	7.03174	7.03735	0.00560905
'C5AR1'	'04080: Neuroactive ligand-receptor interaction, 04610: Complement and coagulation cascades'	0.000886374	7.0167	7.00336	-0.0133473
'C6'	'04610: Complement and coagulation cascades'	0.208132	7.04258	7.03936	-0.0032191
'C7'	'04610: Complement and coagulation cascades'	0.871799	7.03824	7.04041	0.0021709
'C8A'	'04610: Complement and coagulation cascades'	0.722572	7.04904	7.04738	-0.00165999
'C8B'	'04610: Complement and coagulation cascades'	0.317059	7.04178	7.03776	-0.00401623
'C8G'	'04610: Complement and coagulation cascades'	0.419741	7.05131	7.04397	-0.00733902
'C9'	'04610: Complement and coagulation cascades'	0.146399	7.02943	7.04334	0.0139044
'CA11'	'00910: Nitrogen metabolism'	0.383524	7.00553	7.01139	0.00586504
'CA12'	'00910: Nitrogen metabolism'	0.00407286	6.86896	6.90294	0.0339786
'CA2'	'00910: Nitrogen metabolism'	0.00216862	6.80827	6.86109	0.0528149
'CA8'	'00910: Nitrogen metabolism'	0.722572	7.03471	7.03313	-0.00157752
'CA9'	'00910: Nitrogen metabolism'	0.349288	7.01471	7.00931	-0.00540016
'CAB39'	'04150: mTOR signaling pathway'	0.0758785	7.01095	7.01988	0.00892455
'CACNA1A'	'04010: MAPK signaling pathway, 04020: Calcium signaling pathway, 04730: Long-term depression, 04742: Taste transduction, 04930: Type II diabetes mellitus'	0.771454	7.04349	7.04167	-0.00181894
'CACNA1B'	'04010: MAPK signaling pathway, 04020: Calcium signaling pathway, 04742: Taste transduction, 04930: Type II diabetes mellitus'	0.871799	7.05211	7.05262	0.000509887
'CACNA1C'	'04010: MAPK signaling pathway, 04020: Calcium signaling pathway, 04720: Long-term potentiation, 04912: GnRH signaling pathway, 04930: Type II diabetes mellitus'	0.286844	7.04479	7.04309	-0.00169739
'CACNA1D'	'04010: MAPK signaling pathway, 04020: Calcium signaling pathway, 04912: GnRH signaling pathway, 04930: Type II diabetes mellitus'	0.922866	7.02215	7.02118	-0.000971382
'CACNA1F'	'04010: MAPK signaling pathway, 04020: Calcium signaling pathway, 04912: GnRH signaling pathway'	0.628299	7.04062	7.04028	-0.000340778
'CACNA1G'	'04010: MAPK signaling pathway, 04020: Calcium signaling pathway, 04930: Type II diabetes mellitus'	0.628299	7.04111	7.04101	-9.63123e-05
'CACNA1I'	'04010: MAPK signaling pathway, 04020: Calcium signaling pathway'	0.457892	7.06325	7.0595	-0.00375093
'CACNA1S'	'04010: MAPK signaling pathway, 04020: Calcium signaling pathway, 04912: GnRH signaling pathway'	0.539729	7.04407	7.0454	0.00132214
'CACNA2D4'	'04010: MAPK signaling pathway'	0.258636	7.02004	7.02436	0.00431251
'CACNB1'	'04010: MAPK signaling pathway'	0.056882	7.01931	7.02841	0.00909913
'CACNB3'	'04010: MAPK signaling pathway'	0.0129492	6.98655	6.99923	0.0126762
'CACNB4'	'04010: MAPK signaling pathway'	0.457892	7.04242	7.04054	-0.00187928
'CACNG2'	'04010: MAPK signaling pathway'	0.0997601	7.04771	7.0418	-0.00590565
'CACNG7'	'04010: MAPK signaling pathway'	0.129287	7.02092	7.02904	0.00811953
'CACYBP'	'04310: Wnt signaling pathway'	0.258636	6.96228	6.94723	-0.0150423
'CAD'	'00240: Pyrimidine metabolism, 00251: Glutamate metabolism, 00252: Alanine and aspartate metabolism'	0.771454	7.06251	7.06374	0.00123382
'CADM1'	'04514: Cell adhesion molecules (CAMs)'	0.628299	7.03402	7.03879	0.00476731
'CADM3'	'04514: Cell adhesion molecules (CAMs)'	0.317059	7.03409	7.03623	0.00214099
'CALCR'	'04080: Neuroactive ligand-receptor interaction'	0.129287	7.05262	7.04774	-0.00488939
'CALCRL'	'04080: Neuroactive ligand-receptor interaction'	0.000340309	7.03313	7.01072	-0.0224078
'CALM1'	'04020: Calcium signaling pathway, 04070: Phosphatidylinositol signaling system, 04720: Long-term potentiation, 04740: Olfactory transduction, 04910: Insulin signaling pathway, 04912: GnRH signaling pathway, 04916: Melanogenesis, 05040: Huntington''s disease, 05214: Glioma'	0.00216862	7.14063	7.15244	0.0118073
'CALR'	'04612: Antigen processing and presentation'	0.539729	6.93759	6.94697	0.00937825
'CAMK2A'	'04020: Calcium signaling pathway, 04310: Wnt signaling pathway, 04720: Long-term potentiation, 04740: Olfactory transduction, 04912: GnRH signaling pathway, 04916: Melanogenesis, 05214: Glioma'	0.628299	7.07579	7.07657	0.000789277
'CAMK2B'	'04020: Calcium signaling pathway, 04310: Wnt signaling pathway, 04720: Long-term potentiation, 04740: Olfactory transduction, 04912: GnRH signaling pathway, 04916: Melanogenesis, 05214: Glioma'	0.871799	7.05212	7.05111	-0.00100429
'CAMK2D'	'04020: Calcium signaling pathway, 04310: Wnt signaling pathway, 04720: Long-term potentiation, 04740: Olfactory transduction, 04912: GnRH signaling pathway, 04916: Melanogenesis, 05214: Glioma'	0.0305861	7.00678	7.02843	0.0216435
'CAMK2G'	'04020: Calcium signaling pathway, 04310: Wnt signaling pathway, 04720: Long-term potentiation, 04740: Olfactory transduction, 04912: GnRH signaling pathway, 04916: Melanogenesis, 05214: Glioma'	0.0107811	7.04597	7.05689	0.0109187
'CAMK4'	'04020: Calcium signaling pathway, 04720: Long-term potentiation'	0.457892	7.04108	7.04137	0.000283523
'CAMKK1'	'04920: Adipocytokine signaling pathway'	0.146399	7.03377	7.03781	0.00403608
'CAMKK2'	'04920: Adipocytokine signaling pathway'	0.00331391	6.99376	7.002	0.0082446
'CANX'	'04612: Antigen processing and presentation'	0.232412	6.96404	6.95591	-0.00812701
'CAPN1'	'04210: Apoptosis'	0.113771	6.95096	6.96737	0.0164123
'CAPN2'	'04210: Apoptosis, 04510: Focal adhesion'	0.00139729	6.92271	6.94285	0.0201368
'CARD11'	'04660: T cell receptor signaling pathway, 04662: B cell receptor signaling pathway'	0.0997601	7.04331	7.04796	0.00464633
'CASK'	'04530: Tight junction'	0.185746	7.00849	7.0038	-0.00468365
'CASP1'	'01510: Neurodegenerative Disorders, 05040: Huntington''s disease, 05050: Dentatorubropallidoluysian atrophy (DRPLA)'	0.258636	6.95052	6.94467	-0.00584886
'CASP10'	'04210: Apoptosis'	0.821261	7.03645	7.03655	9.2385e-05
'CASP3'	'01510: Neurodegenerative Disorders, 04010: MAPK signaling pathway, 04210: Apoptosis, 04650: Natural killer cell mediated cytotoxicity, 05010: Alzheimer''s disease, 05040: Huntington''s disease, 05050: Dentatorubropallidoluysian atrophy (DRPLA), 05120: Epithelial cell signaling in Helicobacter pylori infection, 05210: Colorectal cancer'	0.258636	7.10288	7.10728	0.00439564
'CASP6'	'01510: Neurodegenerative Disorders, 04210: Apoptosis, 05040: Huntington''s disease'	0.0305861	6.95329	6.97878	0.0254997
'CASP7'	'01510: Neurodegenerative Disorders, 04210: Apoptosis, 05010: Alzheimer''s disease, 05050: Dentatorubropallidoluysian atrophy (DRPLA)'	0.00268598	6.92421	6.95382	0.0296035
'CASP8'	'01510: Neurodegenerative Disorders, 04210: Apoptosis, 04620: Toll-like receptor signaling pathway, 05040: Huntington''s disease, 05050: Dentatorubropallidoluysian atrophy (DRPLA)'	0.821261	7.0818	7.08364	0.00184052
'CASP9'	'04210: Apoptosis, 04370: VEGF signaling pathway, 05210: Colorectal cancer, 05212: Pancreatic cancer'	0.0489799	7.01049	7.01583	0.00533389
'CAT'	'00380: Tryptophan metabolism, 00680: Methane metabolism, 05030: Amyotrophic lateral sclerosis (ALS)'	0.00216862	6.96874	6.99128	0.0225466
'CAV1'	'04510: Focal adhesion'	0.00012268	7.05975	7.03704	-0.0227103
'CAV2'	'04510: Focal adhesion'	0.00111506	7.01115	6.98404	-0.0271091
'CAV3'	'04510: Focal adhesion'	0.922866	7.04015	7.04147	0.00131857
'CBL'	'04630: Jak-STAT signaling pathway, 04660: T cell receptor signaling pathway, 04910: Insulin signaling pathway, 05220: Chronic myeloid leukemia'	0.58323	7.16185	7.16367	0.00182255
'CBLB'	'04630: Jak-STAT signaling pathway, 04660: T cell receptor signaling pathway, 04910: Insulin signaling pathway, 05220: Chronic myeloid leukemia'	0.922866	7.10757	7.10584	-0.00173065
'CBLC'	'04630: Jak-STAT signaling pathway, 04660: T cell receptor signaling pathway, 04910: Insulin signaling pathway, 05220: Chronic myeloid leukemia'	0.419741	7.03433	7.0375	0.0031657
'CBR1'	'00590: Arachidonic acid metabolism'	0.58323	6.96752	6.97135	0.00383373
'CCDC6'	'05216: Thyroid cancer'	0.0997601	6.94813	6.9425	-0.00562586
'CCK'	'04080: Neuroactive ligand-receptor interaction'	0.497916	7.04619	7.04363	-0.00255572
'CCKAR'	'04020: Calcium signaling pathway, 04080: Neuroactive ligand-receptor interaction'	0.383524	7.03782	7.03706	-0.000758968
'CCKBR'	'04020: Calcium signaling pathway, 04080: Neuroactive ligand-receptor interaction'	0.317059	7.03255	7.03892	0.00637349
'CCL1'	'04060: Cytokine-cytokine receptor interaction'	0.349288	7.03913	7.03457	-0.00456725
'CCL11'	'04060: Cytokine-cytokine receptor interaction'	0.383524	6.97278	6.96092	-0.0118579
'CCL13'	'04060: Cytokine-cytokine receptor interaction'	0.349288	7.02365	7.03406	0.0104092
'CCL14'	'04060: Cytokine-cytokine receptor interaction'	0.0305861	6.96925	6.99217	0.0229117
'CCL15'	'04060: Cytokine-cytokine receptor interaction'	0.0129492	6.89904	6.92948	0.0304355
'CCL16'	'04060: Cytokine-cytokine receptor interaction'	0.146399	7.03364	7.03789	0.00424949
'CCL17'	'04060: Cytokine-cytokine receptor interaction'	0.286844	7.03854	7.03727	-0.00127144
'CCL18'	'04060: Cytokine-cytokine receptor interaction'	0.258636	6.98628	6.97282	-0.0134558
'CCL19'	'04060: Cytokine-cytokine receptor interaction'	0.349288	6.96835	7.01121	0.0428643
'CCL2'	'04060: Cytokine-cytokine receptor interaction'	0.0489799	7.00615	6.97536	-0.0307892
'CCL20'	'04060: Cytokine-cytokine receptor interaction'	0.00608134	6.96437	6.91779	-0.0465817
'CCL21'	'04060: Cytokine-cytokine receptor interaction'	0.419741	7.00865	7.01244	0.00379111
'CCL22'	'04060: Cytokine-cytokine receptor interaction'	0.232412	7.04434	7.03755	-0.00679123
'CCL23'	'04060: Cytokine-cytokine receptor interaction'	0.0420206	7.01175	7.03622	0.0244647
'CCL25'	'04060: Cytokine-cytokine receptor interaction'	0.771454	7.02928	7.03469	0.00540421
'CCL26'	'04060: Cytokine-cytokine receptor interaction'	0.0489799	7.04561	7.03594	-0.00967388
'CCL3'	'04060: Cytokine-cytokine receptor interaction, 04620: Toll-like receptor signaling pathway'	0.035917	7.01695	6.99167	-0.0252739
'CCL4'	'04060: Cytokine-cytokine receptor interaction, 04620: Toll-like receptor signaling pathway'	0.771454	7.05001	7.05195	0.00194149
'CCL5'	'04060: Cytokine-cytokine receptor interaction, 04620: Toll-like receptor signaling pathway, 05120: Epithelial cell signaling in Helicobacter pylori infection'	0.00407286	6.95533	6.9918	0.0364707
'CCL7'	'04060: Cytokine-cytokine receptor interaction'	0.922866	7.04209	7.04077	-0.0013188
'CCL8'	'04060: Cytokine-cytokine receptor interaction'	0.0658171	6.94984	7.00224	0.0524
'CCNA1'	'04110: Cell cycle'	0.457892	7.05021	7.04675	-0.00345267
'CCNA2'	'04110: Cell cycle'	0.232412	7.01034	6.99321	-0.0171334
'CCNB1'	'04110: Cell cycle'	0.165192	7.16045	7.14593	-0.0145282
'CCNB1IP1'	'00380: Tryptophan metabolism'	0.286844	6.95044	6.96085	0.0104062
'CCNB2'	'04110: Cell cycle'	0.58323	7.04436	7.0438	-0.000562985
'CCNB3'	'04110: Cell cycle'	0.58323	7.03418	7.03129	-0.00288603
'CCND1'	'04110: Cell cycle, 04310: Wnt signaling pathway, 04510: Focal adhesion, 04630: Jak-STAT signaling pathway, 05210: Colorectal cancer, 05212: Pancreatic cancer, 05214: Glioma, 05216: Thyroid cancer, 05218: Melanoma, 05220: Chronic myeloid leukemia'	0.00216862	7.03183	7.01205	-0.0197777
'CCND2'	'04110: Cell cycle, 04310: Wnt signaling pathway, 04510: Focal adhesion, 04630: Jak-STAT signaling pathway, 05216: Thyroid cancer'	0.821261	7.0172	7.01495	-0.00225268
'CCND3'	'04110: Cell cycle, 04310: Wnt signaling pathway, 04510: Focal adhesion, 04630: Jak-STAT signaling pathway, 05216: Thyroid cancer'	0.674797	7.03603	7.03264	-0.00338725
'CCNE1'	'04110: Cell cycle'	0.457892	7.05163	7.0476	-0.00402613
'CCNE2'	'04110: Cell cycle'	0.539729	7.01329	7.00924	-0.00405213
'CCNH'	'04110: Cell cycle'	0.497916	7.02647	7.02928	0.00280729
'CCR1'	'04060: Cytokine-cytokine receptor interaction'	0.165192	7.01488	7.00803	-0.00684805
'CCR2'	'04060: Cytokine-cytokine receptor interaction'	0.457892	7.02176	7.02663	0.00487088
'CCR3'	'04060: Cytokine-cytokine receptor interaction'	0.628299	7.03986	7.03589	-0.00396189
'CCR4'	'04060: Cytokine-cytokine receptor interaction'	0.165192	7.04386	7.03656	-0.00729291
'CCR5'	'04060: Cytokine-cytokine receptor interaction'	0.871799	7.03071	7.02736	-0.00334676
'CCR6'	'04060: Cytokine-cytokine receptor interaction'	0.497916	7.03091	7.02938	-0.00152863
'CCR7'	'04060: Cytokine-cytokine receptor interaction'	0.871799	7.02073	7.02562	0.00489069
'CCR8'	'04060: Cytokine-cytokine receptor interaction'	0.383524	7.0477	7.04362	-0.00407912
'CCR9'	'04060: Cytokine-cytokine receptor interaction'	0.628299	7.02663	7.03029	0.00366339
'CCS'	'05030: Amyotrophic lateral sclerosis (ALS)'	0.165192	6.98003	6.98311	0.00307957
'CD14'	'04010: MAPK signaling pathway, 04620: Toll-like receptor signaling pathway, 04640: Hematopoietic cell lineage, 04810: Regulation of actin cytoskeleton, 05130: Pathogenic Escherichia coli infection - EHEC, 05131: Pathogenic Escherichia coli infection - EPEC'	0.497916	6.94376	6.94949	0.00573088
'CD19'	'04640: Hematopoietic cell lineage, 04662: B cell receptor signaling pathway'	0.871799	7.03474	7.03366	-0.00107308
'CD1A'	'04640: Hematopoietic cell lineage'	0.349288	7.02128	7.01961	-0.00167385
'CD1B'	'04640: Hematopoietic cell lineage'	0.674797	7.04541	7.04635	0.000942539
'CD1C'	'04640: Hematopoietic cell lineage'	0.317059	7.0407	7.02825	-0.0124483
'CD1D'	'04640: Hematopoietic cell lineage'	0.185746	7.00612	7.01066	0.00454191
'CD1E'	'04640: Hematopoietic cell lineage'	0.539729	7.03913	7.03323	-0.00589456
'CD2'	'04514: Cell adhesion molecules (CAMs), 04640: Hematopoietic cell lineage'	0.129287	6.97031	6.97814	0.00783535
'CD22'	'04514: Cell adhesion molecules (CAMs), 04640: Hematopoietic cell lineage, 04662: B cell receptor signaling pathway'	0.722572	7.04824	7.04159	-0.00664747
'CD226'	'04514: Cell adhesion molecules (CAMs)'	0.821261	7.0401	7.04379	0.00368395
'CD24'	'04640: Hematopoietic cell lineage'	0.00738835	6.81677	6.85178	0.0350155
'CD244'	'04650: Natural killer cell mediated cytotoxicity'	0.821261	7.0486	7.04982	0.00122166
'CD247'	'04650: Natural killer cell mediated cytotoxicity, 04660: T cell receptor signaling pathway'	0.165192	7.05345	7.05847	0.00501508
'CD27'	'04060: Cytokine-cytokine receptor interaction'	0.087161	6.96368	6.97656	0.012877
'CD274'	'04514: Cell adhesion molecules (CAMs)'	0.286844	7.02017	7.0221	0.00192811
'CD28'	'04514: Cell adhesion molecules (CAMs), 04660: T cell receptor signaling pathway, 04940: Type I diabetes mellitus'	0.722572	7.06026	7.06315	0.00288607
'CD33'	'04640: Hematopoietic cell lineage'	0.383524	7.04264	7.04406	0.00141182
'CD34'	'04514: Cell adhesion molecules (CAMs), 04640: Hematopoietic cell lineage'	0.000340309	7.01107	6.99336	-0.0177063
'CD36'	'03320: PPAR signaling pathway, 04512: ECM-receptor interaction, 04640: Hematopoietic cell lineage, 04920: Adipocytokine signaling pathway'	0.056882	7.01625	7.02799	0.0117381
'CD38'	'00760: Nicotinate and nicotinamide metabolism, 04020: Calcium signaling pathway, 04640: Hematopoietic cell lineage'	0.771454	7.02945	7.02698	-0.00246802
'CD3D'	'04640: Hematopoietic cell lineage, 04660: T cell receptor signaling pathway'	0.0489799	6.99831	7.00236	0.00404326
'CD3E'	'04640: Hematopoietic cell lineage, 04660: T cell receptor signaling pathway'	0.232412	7.04004	7.04412	0.004082
'CD3G'	'04640: Hematopoietic cell lineage, 04660: T cell receptor signaling pathway'	0.0107811	7.04143	7.05529	0.0138529
'CD4'	'04514: Cell adhesion molecules (CAMs), 04612: Antigen processing and presentation, 04640: Hematopoietic cell lineage, 04660: T cell receptor signaling pathway'	0.722572	7.09409	7.09638	0.00229135
'CD40'	'04060: Cytokine-cytokine receptor interaction, 04514: Cell adhesion molecules (CAMs), 04620: Toll-like receptor signaling pathway'	0.0154943	7.0572	7.04722	-0.00998274
'CD40LG'	'04060: Cytokine-cytokine receptor interaction, 04514: Cell adhesion molecules (CAMs), 04660: T cell receptor signaling pathway'	0.539729	7.05866	7.05918	0.000516614
'CD44'	'04512: ECM-receptor interaction, 04640: Hematopoietic cell lineage'	0.0420206	7.06828	7.05642	-0.0118607
'CD46'	'04610: Complement and coagulation cascades'	0.771454	6.93616	6.92557	-0.0105876
'CD47'	'04512: ECM-receptor interaction'	0.457892	7.01553	7.0163	0.000772083
'CD48'	'04650: Natural killer cell mediated cytotoxicity'	0.0997601	7.00766	7.02052	0.0128593
'CD5'	'04640: Hematopoietic cell lineage'	0.821261	7.04387	7.04146	-0.00240803
'CD55'	'04610: Complement and coagulation cascades, 04640: Hematopoietic cell lineage'	0.0107811	7.00591	6.978	-0.0279126
'CD58'	'04514: Cell adhesion molecules (CAMs)'	0.113771	6.96305	6.96954	0.00649465
'CD59'	'04610: Complement and coagulation cascades, 04640: Hematopoietic cell lineage'	0.185746	6.92959	6.91796	-0.0116329
'CD6'	'04514: Cell adhesion molecules (CAMs)'	0.317059	7.03988	7.03379	-0.00609812
'CD7'	'04640: Hematopoietic cell lineage'	0.258636	7.01251	7.02052	0.00800827
'CD72'	'04662: B cell receptor signaling pathway'	0.208132	7.04568	7.03412	-0.0115599
'CD74'	'04612: Antigen processing and presentation'	0.0420206	6.98925	7.00348	0.0142281
'CD79A'	'04662: B cell receptor signaling pathway'	0.821261	7.00547	7.00235	-0.00312107
'CD79B'	'04662: B cell receptor signaling pathway'	0.419741	7.04754	7.05043	0.002892
'CD80'	'04514: Cell adhesion molecules (CAMs), 04620: Toll-like receptor signaling pathway, 04940: Type I diabetes mellitus'	0.771454	7.01959	7.01868	-0.000913771
'CD81'	'04662: B cell receptor signaling pathway'	0.821261	6.88246	6.88058	-0.00188175
'CD86'	'04514: Cell adhesion molecules (CAMs), 04620: Toll-like receptor signaling pathway, 04940: Type I diabetes mellitus'	0.722572	7.01539	7.01323	-0.00216709
'CD8A'	'04514: Cell adhesion molecules (CAMs), 04612: Antigen processing and presentation, 04640: Hematopoietic cell lineage, 04660: T cell receptor signaling pathway'	0.286844	7.02231	7.028	0.00568996
'CD8B'	'04514: Cell adhesion molecules (CAMs), 04612: Antigen processing and presentation, 04640: Hematopoietic cell lineage, 04660: T cell receptor signaling pathway'	0.146399	7.05357	7.05927	0.00569638
'CD9'	'04640: Hematopoietic cell lineage'	0.258636	7.12521	7.12963	0.00442609
'CD99'	'04514: Cell adhesion molecules (CAMs), 04670: Leukocyte transendothelial migration'	0.0997601	6.88852	6.90328	0.0147605
'CDC14A'	'04110: Cell cycle'	0.146399	7.03341	7.03724	0.00382804
'CDC14B'	'04110: Cell cycle'	0.113771	7.0215	7.02418	0.00268527
'CDC16'	'04110: Cell cycle, 04120: Ubiquitin mediated proteolysis'	0.457892	7.14504	7.14231	-0.002731
'CDC20'	'04110: Cell cycle, 04120: Ubiquitin mediated proteolysis'	0.208132	7.11574	7.104	-0.0117421
'CDC23'	'04110: Cell cycle, 04120: Ubiquitin mediated proteolysis'	0.497916	7.17192	7.1712	-0.000717531
'CDC25A'	'04110: Cell cycle'	0.087161	7.05208	7.04474	-0.00733886
'CDC25B'	'04010: MAPK signaling pathway, 04110: Cell cycle'	0.0184697	6.98662	6.95091	-0.0357097
'CDC25C'	'04110: Cell cycle'	0.674797	7.05793	7.05435	-0.00358419
'CDC27'	'04110: Cell cycle, 04120: Ubiquitin mediated proteolysis'	0.0184697	7.193	7.18394	-0.00905876
'CDC34'	'04120: Ubiquitin mediated proteolysis'	0.771454	7.01766	7.01786	0.000208501
'CDC42'	'04010: MAPK signaling pathway, 04360: Axon guidance, 04370: VEGF signaling pathway, 04510: Focal adhesion, 04520: Adherens junction, 04530: Tight junction, 04660: T cell receptor signaling pathway, 04670: Leukocyte transendothelial migration, 04810: Regulation of actin cytoskeleton, 04912: GnRH signaling pathway, 05120: Epithelial cell signaling in Helicobacter pylori infection, 05130: Pathogeni…	0.0154943	7.11831	7.12233	0.00402256
'CDC6'	'04110: Cell cycle'	0.0184697	7.04766	7.02328	-0.024382
'CDC7'	'04110: Cell cycle'	0.232412	7.01544	7.0117	-0.0037417
'CDH1'	'04514: Cell adhesion molecules (CAMs), 04520: Adherens junction, 05130: Pathogenic Escherichia coli infection - EHEC, 05131: Pathogenic Escherichia coli infection - EPEC, 05216: Thyroid cancer, 05218: Melanoma'	0.146399	7.06844	7.07344	0.00500435
'CDH15'	'04514: Cell adhesion molecules (CAMs)'	0.674797	7.0408	7.03762	-0.00317131
'CDH2'	'04514: Cell adhesion molecules (CAMs)'	0.0219336	7.07006	7.06127	-0.00879427
'CDH3'	'04514: Cell adhesion molecules (CAMs)'	0.000886374	7.05302	6.96669	-0.0863298
'CDH4'	'04514: Cell adhesion molecules (CAMs)'	0.628299	7.03361	7.03181	-0.00179952
'CDH5'	'04514: Cell adhesion molecules (CAMs), 04670: Leukocyte transendothelial migration'	0.000553547	7.0259	6.9979	-0.0279931
'CDIPT'	'00564: Glycerophospholipid metabolism, 04070: Phosphatidylinositol signaling system'	0.349288	6.98606	6.99165	0.00559419
'CDK2'	'04110: Cell cycle'	0.232412	7.10528	7.09693	-0.00834201
'CDK4'	'04110: Cell cycle, 04530: Tight junction, 04660: T cell receptor signaling pathway, 05212: Pancreatic cancer, 05214: Glioma, 05218: Melanoma, 05220: Chronic myeloid leukemia'	0.457892	6.97752	6.95878	-0.0187461
'CDK5'	'04360: Axon guidance'	0.0305861	7.02155	7.00297	-0.018586
'CDK6'	'04110: Cell cycle, 05212: Pancreatic cancer, 05214: Glioma, 05218: Melanoma, 05220: Chronic myeloid leukemia'	1	7.03606	7.03643	0.000367428
'CDK7'	'04110: Cell cycle'	0.146399	7.01451	7.00989	-0.00461677
'CDKN1A'	'04110: Cell cycle, 05214: Glioma, 05218: Melanoma, 05220: Chronic myeloid leukemia'	0.00407286	7.0662	7.07867	0.0124641
'CDKN1B'	'04110: Cell cycle, 05220: Chronic myeloid leukemia'	0.539729	6.96192	6.96209	0.000168434
'CDKN1C'	'04110: Cell cycle'	0.497916	7.03794	7.03565	-0.00228905
'CDKN2A'	'04110: Cell cycle, 05212: Pancreatic cancer, 05214: Glioma, 05218: Melanoma, 05220: Chronic myeloid leukemia'	0.035917	7.06027	7.05275	-0.00751789
'CDKN2B'	'04110: Cell cycle, 04350: TGF-beta signaling pathway'	0.00738835	6.9649	7.01142	0.0465176
'CDKN2C'	'04110: Cell cycle'	0.258636	7.00498	7.00966	0.00467635
'CDKN2D'	'04110: Cell cycle'	0.628299	7.03979	7.0409	0.00110982
'CDO1'	'00272: Cysteine metabolism, 00430: Taurine and hypotaurine metabolism'	0.539729	7.03236	7.03275	0.00038954
'CEL'	'00120: Bile acid biosynthesis, 00561: Glycerolipid metabolism'	0.00738835	7.04627	7.03006	-0.01621
'CER1'	'04310: Wnt signaling pathway'	0.0658171	7.00952	7.01308	0.00355551
'CERK'	'00600: Sphingolipid metabolism'	0.0259496	6.94692	6.95573	0.00881265
'CES1'	'00960: Alkaloid biosynthesis II'	0.871799	7.01154	7.01314	0.00159661
'CFB'	'04610: Complement and coagulation cascades'	0.0129492	7.07118	7.06369	-0.0074831
'CFD'	'04610: Complement and coagulation cascades'	0.000265259	6.97423	7.02482	0.0505893
'CFH'	'04610: Complement and coagulation cascades'	0.383524	7.0706	7.07295	0.00235459
'CFI'	'04610: Complement and coagulation cascades'	0.000886374	7.02861	6.9995	-0.0291052
'CFL1'	'04360: Axon guidance, 04810: Regulation of actin cytoskeleton'	0.0658171	7.04972	7.06031	0.0105952
'CFL2'	'04360: Axon guidance, 04810: Regulation of actin cytoskeleton'	0.821261	6.99508	6.99747	0.00239005
'CFLAR'	'04210: Apoptosis'	0.00608134	6.98801	7.00251	0.0145043
'CFTR'	'02010: ABC transporters - General'	0.146399	7.03717	7.04186	0.00468983
'CGA'	'04080: Neuroactive ligand-receptor interaction, 04912: GnRH signaling pathway'	0.317059	7.05149	7.05004	-0.00145418
'CGN'	'04530: Tight junction'	0.00174413	6.93508	6.96319	0.0281114
'CHAD'	'01430: Cell Communication, 04510: Focal adhesion, 04512: ECM-receptor interaction'	0.0489799	7.01747	7.04238	0.0249087
'CHAT'	'00564: Glycerophospholipid metabolism'	0.974253	7.04721	7.04883	0.00161474
'CHD8'	'04310: Wnt signaling pathway'	0.165192	7.18672	7.17961	-0.00711083
'CHEK1'	'04110: Cell cycle'	0.0997601	7.17308	7.1657	-0.00737944
'CHEK2'	'04110: Cell cycle'	0.457892	7.02118	7.02142	0.000235795
'CHFR'	'00380: Tryptophan metabolism'	0.113771	7.01011	7.01758	0.00746919
'CHKB'	'00260: Glycine, serine and threonine metabolism, 00564: Glycerophospholipid metabolism'	0.000340309	6.98124	7.00596	0.0247155
'CHP'	'04010: MAPK signaling pathway, 04020: Calcium signaling pathway, 04210: Apoptosis, 04310: Wnt signaling pathway, 04360: Axon guidance, 04370: VEGF signaling pathway, 04650: Natural killer cell mediated cytotoxicity, 04660: T cell receptor signaling pathway, 04662: B cell receptor signaling pathway, 04720: Long-term potentiation'	0.0154943	6.91251	6.93013	0.0176206
'CHPF'	'00532: Chondroitin sulfate biosynthesis, 01030: Glycan structures - biosynthesis 1'	0.00268598	6.9834	6.97123	-0.0121627
'CHRD'	'04350: TGF-beta signaling pathway'	0.871799	7.03842	7.0404	0.00198135
'CHRM1'	'04020: Calcium signaling pathway, 04080: Neuroactive ligand-receptor interaction, 04810: Regulation of actin cytoskeleton'	0.974253	7.03812	7.0363	-0.00182756
'CHRM2'	'04020: Calcium signaling pathway, 04080: Neuroactive ligand-receptor interaction, 04810: Regulation of actin cytoskeleton'	0.974253	7.04206	7.04201	-4.54209e-05
'CHRM3'	'04020: Calcium signaling pathway, 04080: Neuroactive ligand-receptor interaction, 04810: Regulation of actin cytoskeleton'	0.185746	7.04086	7.03729	-0.00356834
'CHRM4'	'04080: Neuroactive ligand-receptor interaction, 04810: Regulation of actin cytoskeleton'	0.674797	7.04283	7.04306	0.000235905
'CHRNA7'	'04020: Calcium signaling pathway'	0.129287	7.01886	7.02805	0.00919025
'CHST1'	'00533: Keratan sulfate biosynthesis, 01030: Glycan structures - biosynthesis 1'	0.628299	7.01291	7.00988	-0.00303112
'CHST4'	'00533: Keratan sulfate biosynthesis, 01030: Glycan structures - biosynthesis 1'	0.674797	7.01636	7.01402	-0.00233854
'CHST9'	'00272: Cysteine metabolism'	0.087161	7.04441	7.03621	-0.00820856
'CHUK'	'04010: MAPK signaling pathway, 04210: Apoptosis, 04620: Toll-like receptor signaling pathway, 04660: T cell receptor signaling pathway, 04662: B cell receptor signaling pathway, 04920: Adipocytokine signaling pathway, 05120: Epithelial cell signaling in Helicobacter pylori infection, 05212: Pancreatic cancer, 05220: Chronic myeloid leukemia'	0.457892	7.05482	7.0636	0.00878042
'CIITA'	'04612: Antigen processing and presentation'	0.497916	7.0289	7.03205	0.00315367
'CISH'	'04630: Jak-STAT signaling pathway'	0.232412	6.99631	6.99835	0.00204723
'CKB'	'00330: Arginine and proline metabolism'	0.00174413	6.97977	7.01193	0.0321534
'CKM'	'00330: Arginine and proline metabolism'	0.258636	7.11787	7.11427	-0.00359448
'CKMT2'	'00330: Arginine and proline metabolism'	0.674797	7.02839	7.0301	0.00171314
'CLCA1'	'04740: Olfactory transduction'	0.00331391	6.80656	6.85662	0.0500628
'CLCA2'	'04740: Olfactory transduction'	0.974253	7.07923	7.07759	-0.00163847
'CLCF1'	'04060: Cytokine-cytokine receptor interaction, 04630: Jak-STAT signaling pathway'	0.497916	7.00226	7.00906	0.00679757
'CLDN1'	'04514: Cell adhesion molecules (CAMs), 04530: Tight junction, 04670: Leukocyte transendothelial migration, 05130: Pathogenic Escherichia coli infection - EHEC, 05131: Pathogenic Escherichia coli infection - EPEC'	0.0489799	7.03876	7.02731	-0.0114479
'CLDN11'	'04514: Cell adhesion molecules (CAMs), 04530: Tight junction, 04670: Leukocyte transendothelial migration'	0.232412	7.03588	7.02991	-0.00597534
'CLDN2'	'04514: Cell adhesion molecules (CAMs), 04530: Tight junction, 04670: Leukocyte transendothelial migration'	0.00498637	7.02706	7.00264	-0.0244232
'CLDN3'	'04514: Cell adhesion molecules (CAMs), 04530: Tight junction, 04670: Leukocyte transendothelial migration'	0.0184697	6.84587	6.87454	0.0286676
'CLDN4'	'04514: Cell adhesion molecules (CAMs), 04530: Tight junction, 04670: Leukocyte transendothelial migration'	0.317059	7.01194	7.0127	0.000759249
'CLDN5'	'04514: Cell adhesion molecules (CAMs), 04530: Tight junction, 04670: Leukocyte transendothelial migration'	0.208132	6.99428	7.00529	0.0110088
'CLDN6'	'04514: Cell adhesion molecules (CAMs), 04530: Tight junction, 04670: Leukocyte transendothelial migration'	0.628299	7.04178	7.04021	-0.00157205
'CLDN7'	'04514: Cell adhesion molecules (CAMs), 04530: Tight junction, 04670: Leukocyte transendothelial migration'	0.00268598	6.83127	6.86357	0.0322995
'CLDN8'	'04514: Cell adhesion molecules (CAMs), 04530: Tight junction, 04670: Leukocyte transendothelial migration'	0.008942	6.89318	6.9478	0.0546147
'CLOCK'	'04710: Circadian rhythm'	0.722572	7.02873	7.02851	-0.000223759
'CLTA'	'05040: Huntington''s disease'	0.457892	7.05475	7.05239	-0.00235718
'CLTB'	'05040: Huntington''s disease'	0.008942	6.9195	6.94068	0.0211853
'CLTC'	'05040: Huntington''s disease'	0.58323	7.15381	7.15592	0.00211038
'CLTCL1'	'05040: Huntington''s disease'	0.349288	7.03845	7.03588	-0.00257203
'CLYBL'	'00020: Citrate cycle (TCA cycle)'	0.00608134	7.01927	7.02767	0.00839454
'CMBL'	'00361: gamma-Hexachlorocyclohexane degradation, 00627: 1-4-Dichlorobenzene degradation'	0.00139729	6.87277	6.91272	0.0399525
'CNGA3'	'04740: Olfactory transduction'	0.419741	7.02363	7.02974	0.00611649
'CNGB1'	'04740: Olfactory transduction'	0.821261	7.04296	7.04294	-1.92007e-05
'CNOT4'	'00380: Tryptophan metabolism'	0.087161	7.10374	7.10802	0.00428446
'CNR1'	'04080: Neuroactive ligand-receptor interaction'	0.821261	7.04734	7.04588	-0.0014617
'CNR2'	'04080: Neuroactive ligand-receptor interaction'	0.232412	7.00269	7.00939	0.00669846
'CNTF'	'04060: Cytokine-cytokine receptor interaction, 04630: Jak-STAT signaling pathway'	0.497916	7.04936	7.04613	-0.00322503
'CNTFR'	'04060: Cytokine-cytokine receptor interaction, 04630: Jak-STAT signaling pathway'	0.349288	7.02675	7.03282	0.00606817
'CNTN1'	'04514: Cell adhesion molecules (CAMs)'	0.922866	7.05453	7.05212	-0.00240305
'CNTN2'	'04514: Cell adhesion molecules (CAMs)'	0.258636	7.05839	7.0541	-0.00428112
'CNTNAP1'	'04514: Cell adhesion molecules (CAMs)'	1	7.02584	7.02813	0.00228932
'CNTNAP2'	'04514: Cell adhesion molecules (CAMs)'	0.165192	7.10709	7.10232	-0.00476878
'COASY'	'00770: Pantothenate and CoA biosynthesis'	0.871799	6.93822	6.93859	0.000368984
'COL11A1'	'01430: Cell Communication, 04510: Focal adhesion, 04512: ECM-receptor interaction'	0.00608134	7.04098	7.02899	-0.011997
'COL11A2'	'01430: Cell Communication, 04510: Focal adhesion, 04512: ECM-receptor interaction'	0.539729	7.02297	7.02205	-0.000920172
'COL17A1'	'01430: Cell Communication'	0.457892	6.99995	6.99854	-0.00141376
'COL1A1'	'01430: Cell Communication, 04510: Focal adhesion, 04512: ECM-receptor interaction'	0.00111506	7.00796	6.96316	-0.0447975
'COL1A2'	'01430: Cell Communication, 04510: Focal adhesion, 04512: ECM-receptor interaction'	0.000553547	6.96699	6.90249	-0.0644943
'COL2A1'	'01430: Cell Communication, 04510: Focal adhesion, 04512: ECM-receptor interaction'	1	7.05847	7.05546	-0.00300419
'COL3A1'	'01430: Cell Communication, 04510: Focal adhesion, 04512: ECM-receptor interaction'	0.232412	6.87018	6.86259	-0.0075933
'COL4A1'	'01430: Cell Communication, 04510: Focal adhesion, 04512: ECM-receptor interaction'	0.000159265	7.00467	6.91411	-0.0905629
'COL4A2'	'01430: Cell Communication, 04510: Focal adhesion, 04512: ECM-receptor interaction'	0.000159265	6.97187	6.9253	-0.0465776
'COL4A4'	'01430: Cell Communication, 04510: Focal adhesion, 04512: ECM-receptor interaction'	0.232412	7.03764	7.03302	-0.00461475
'COL4A6'	'01430: Cell Communication, 04510: Focal adhesion, 04512: ECM-receptor interaction'	0.208132	7.02676	7.03131	0.0045448
'COL5A1'	'01430: Cell Communication, 04510: Focal adhesion, 04512: ECM-receptor interaction'	0.0129492	6.9753	6.95054	-0.0247653
'COL5A2'	'01430: Cell Communication, 04510: Focal adhesion, 04512: ECM-receptor interaction'	0.00174413	6.97289	6.92256	-0.0503209
'COL5A3'	'01430: Cell Communication, 04510: Focal adhesion, 04512: ECM-receptor interaction'	0.000159265	7.03958	7.00834	-0.0312339
'COL6A1'	'01430: Cell Communication, 04510: Focal adhesion, 04512: ECM-receptor interaction'	0.185746	7.03814	7.02681	-0.0113297
'COL6A2'	'01430: Cell Communication, 04510: Focal adhesion, 04512: ECM-receptor interaction'	0.722572	6.94936	6.94973	0.00036812
'COL6A3'	'01430: Cell Communication, 04510: Focal adhesion, 04512: ECM-receptor interaction'	0.000434878	6.93106	6.87846	-0.0526046
'COMP'	'01430: Cell Communication, 04350: TGF-beta signaling pathway, 04510: Focal adhesion'	0.419741	7.0354	7.03261	-0.00279704
'COPA'	'04080: Neuroactive ligand-receptor interaction'	0.056882	7.23461	7.22951	-0.00509501
'COPS5'	'00310: Lysine degradation, 00780: Biotin metabolism'	0.58323	7.11836	7.11604	-0.00231712
'COQ6'	'00130: Ubiquinone biosynthesis'	0.165192	7.00534	7.00927	0.00393313
'CORT'	'04080: Neuroactive ligand-receptor interaction'	0.539729	7.02424	7.02683	0.00258974
'COX17'	'00190: Oxidative phosphorylation'	0.008942	6.98004	6.99072	0.0106787
'COX4I1'	'00190: Oxidative phosphorylation'	0.0658171	6.93181	6.94663	0.0148196
'COX4I2'	'00190: Oxidative phosphorylation'	0.286844	7.0108	7.00881	-0.00199625
'COX5A'	'00190: Oxidative phosphorylation'	0.0184697	7.02217	7.03279	0.0106181
'COX5B'	'00190: Oxidative phosphorylation'	0.0420206	6.85178	6.8795	0.0277245
'COX6A1'	'00190: Oxidative phosphorylation'	0.232412	7.05438	7.05081	-0.0035658
'COX6B1'	'00190: Oxidative phosphorylation'	0.0420206	6.86244	6.87742	0.0149759
'COX6C'	'00190: Oxidative phosphorylation'	0.0489799	6.83128	6.85285	0.0215684
'COX7A2L'	'00190: Oxidative phosphorylation'	0.146399	6.89615	6.90748	0.0113239
'COX7B'	'00190: Oxidative phosphorylation'	0.0305861	6.94089	6.95396	0.0130702
'COX7C'	'00190: Oxidative phosphorylation'	0.0489799	6.83652	6.855	0.0184735
'COX8A'	'00190: Oxidative phosphorylation'	0.00738835	6.84207	6.86213	0.0200537
'CP'	'00860: Porphyrin and chlorophyll metabolism'	0.0758785	7.03198	7.0441	0.0121175
'CPB2'	'04610: Complement and coagulation cascades'	0.146399	7.04928	7.04024	-0.00904208
'CPE'	'04940: Type I diabetes mellitus'	0.087161	6.99447	6.96453	-0.0299426
'CPS1'	'00220: Urea cycle and metabolism of amino groups, 00251: Glutamate metabolism, 00330: Arginine and proline metabolism, 00910: Nitrogen metabolism'	0.349288	7.05295	7.05087	-0.00208262
'CPT1A'	'00071: Fatty acid metabolism, 03320: PPAR signaling pathway, 04920: Adipocytokine signaling pathway'	0.035917	7.06903	7.07569	0.00666005
'CPT2'	'00071: Fatty acid metabolism, 03320: PPAR signaling pathway, 04920: Adipocytokine signaling pathway'	0.0129492	7.0195	7.03557	0.0160693
'CR1'	'04610: Complement and coagulation cascades, 04640: Hematopoietic cell lineage'	0.113771	7.04386	7.03788	-0.00598149
'CR2'	'04610: Complement and coagulation cascades, 04640: Hematopoietic cell lineage, 04662: B cell receptor signaling pathway'	0.539729	7.03971	7.04545	0.00573982
'CRB3'	'04530: Tight junction'	0.00268598	6.98739	6.99631	0.00892134
'CREB1'	'04612: Antigen processing and presentation, 04916: Melanogenesis'	0.722572	7.04342	7.04426	0.000832878
'CREB3'	'04916: Melanogenesis'	0.286844	6.96842	6.96336	-0.00505343
'CREB3L1'	'04916: Melanogenesis'	0.383524	6.94895	6.95061	0.00165754
'CREB3L3'	'04916: Melanogenesis'	0.383524	7.04267	7.03732	-0.00534705
'CREBBP'	'01510: Neurodegenerative Disorders, 04110: Cell cycle, 04310: Wnt signaling pathway, 04330: Notch signaling pathway, 04350: TGF-beta signaling pathway, 04520: Adherens junction, 04630: Jak-STAT signaling pathway, 04720: Long-term potentiation, 04916: Melanogenesis, 05040: Huntington''s disease'	0.208132	7.13987	7.13221	-0.00765825
'CRH'	'04080: Neuroactive ligand-receptor interaction, 04730: Long-term depression'	0.232412	7.04389	7.03866	-0.00523327
'CRHR1'	'04080: Neuroactive ligand-receptor interaction, 04730: Long-term depression'	0.58323	7.04231	7.04042	-0.00189003
'CRHR2'	'04080: Neuroactive ligand-receptor interaction'	0.722572	7.04194	7.04123	-0.000707847
'CRK'	'04010: MAPK signaling pathway, 04510: Focal adhesion, 04810: Regulation of actin cytoskeleton, 04910: Insulin signaling pathway, 05220: Chronic myeloid leukemia'	0.165192	7.04437	7.04784	0.00347633
'CRKL'	'04010: MAPK signaling pathway, 04510: Focal adhesion, 04810: Regulation of actin cytoskeleton, 04910: Insulin signaling pathway, 05220: Chronic myeloid leukemia'	0.383524	7.02462	7.02194	-0.00267066
'CRLF2'	'04060: Cytokine-cytokine receptor interaction, 04630: Jak-STAT signaling pathway'	0.419741	7.03749	7.03935	0.00186167
'CRLS1'	'00564: Glycerophospholipid metabolism'	0.258636	7.01724	7.02031	0.0030634
'CRY1'	'04710: Circadian rhythm'	0.419741	7.03064	7.02788	-0.00276343
'CS'	'00020: Citrate cycle (TCA cycle), 00630: Glyoxylate and dicarboxylate metabolism'	0.146399	6.85736	6.87226	0.0148995
'CSDA'	'04530: Tight junction'	0.539729	7.12169	7.12048	-0.00121391
'CSF1'	'04060: Cytokine-cytokine receptor interaction, 04640: Hematopoietic cell lineage'	0.539729	7.11236	7.11343	0.00107495
'CSF1R'	'04060: Cytokine-cytokine receptor interaction, 04640: Hematopoietic cell lineage'	0.0305861	6.95491	6.97299	0.0180744
'CSF2'	'04060: Cytokine-cytokine receptor interaction, 04630: Jak-STAT signaling pathway, 04640: Hematopoietic cell lineage, 04650: Natural killer cell mediated cytotoxicity, 04660: T cell receptor signaling pathway, 04664: Fc epsilon RI signaling pathway'	0.165192	7.0625	7.05856	-0.00393965
'CSF2RA'	'04060: Cytokine-cytokine receptor interaction, 04630: Jak-STAT signaling pathway, 04640: Hematopoietic cell lineage'	0.871799	7.05378	7.052	-0.0017795
'CSF2RB'	'04060: Cytokine-cytokine receptor interaction, 04210: Apoptosis, 04630: Jak-STAT signaling pathway'	0.0997601	7.00262	6.98606	-0.0165582
'CSF3'	'04060: Cytokine-cytokine receptor interaction, 04630: Jak-STAT signaling pathway, 04640: Hematopoietic cell lineage'	0.00268598	7.04402	7.01945	-0.024574
'CSF3R'	'04060: Cytokine-cytokine receptor interaction, 04630: Jak-STAT signaling pathway, 04640: Hematopoietic cell lineage'	0.00331391	7.04064	7.01509	-0.0255521
'CSK'	'04810: Regulation of actin cytoskeleton, 05120: Epithelial cell signaling in Helicobacter pylori infection'	0.419741	7.14286	7.14106	-0.00180299
'CSNK1A1'	'04310: Wnt signaling pathway, 04340: Hedgehog signaling pathway'	0.0107811	7.00335	7.02197	0.0186153
'CSNK1D'	'04340: Hedgehog signaling pathway, 04540: Gap junction, 04710: Circadian rhythm'	0.419741	6.96544	6.96921	0.00376897
'CSNK1E'	'04310: Wnt signaling pathway, 04340: Hedgehog signaling pathway, 04710: Circadian rhythm'	0.497916	7.03067	7.02788	-0.00278178
'CSNK1G1'	'04340: Hedgehog signaling pathway'	0.317059	7.02174	7.02383	0.00208678
'CSNK1G2'	'04340: Hedgehog signaling pathway'	0.871799	6.97849	6.97953	0.00104421
'CSNK2A1'	'04310: Wnt signaling pathway, 04520: Adherens junction, 04530: Tight junction'	0.419741	7.09175	7.09184	9.44138e-05
'CSNK2A2'	'04310: Wnt signaling pathway, 04520: Adherens junction, 04530: Tight junction'	0.974253	7.0314	7.03431	0.0029015
'CSNK2B'	'04310: Wnt signaling pathway, 04520: Adherens junction, 04530: Tight junction'	0.419741	6.93833	6.94446	0.00613157
'CTBP1'	'04310: Wnt signaling pathway, 04330: Notch signaling pathway, 05220: Chronic myeloid leukemia'	0.922866	7.06338	7.07024	0.00686725
'CTBP2'	'04310: Wnt signaling pathway, 04330: Notch signaling pathway, 05220: Chronic myeloid leukemia'	0.0658171	6.95129	6.95659	0.00529681
'CTF1'	'04060: Cytokine-cytokine receptor interaction, 04630: Jak-STAT signaling pathway'	0.539729	7.03601	7.03932	0.00331116
'CTH'	'00260: Glycine, serine and threonine metabolism, 00271: Methionine metabolism, 00272: Cysteine metabolism, 00450: Selenoamino acid metabolism, 00910: Nitrogen metabolism'	0.0489799	6.99492	7.00591	0.0109813
'CTLA4'	'04514: Cell adhesion molecules (CAMs), 04660: T cell receptor signaling pathway'	0.035917	7.04592	7.03757	-0.00834562
'CTNNA1'	'04520: Adherens junction, 04530: Tight junction, 04670: Leukocyte transendothelial migration'	0.0997601	7.07148	7.06193	-0.0095554
'CTNNA2'	'04520: Adherens junction, 04530: Tight junction, 04670: Leukocyte transendothelial migration'	0.0305861	7.05284	7.04742	-0.00541756
'CTNNA3'	'04520: Adherens junction, 04530: Tight junction, 04670: Leukocyte transendothelial migration'	0.165192	7.04427	7.03797	-0.00630577
'CTNNB1'	'04310: Wnt signaling pathway, 04510: Focal adhesion, 04520: Adherens junction, 04530: Tight junction, 04670: Leukocyte transendothelial migration, 04916: Melanogenesis, 05130: Pathogenic Escherichia coli infection - EHEC, 05131: Pathogenic Escherichia coli infection - EPEC, 05210: Colorectal cancer, 05216: Thyroid cancer, 05217: Basal cell carcinoma'	0.286844	7.21358	7.20902	-0.00455925
'CTNNBIP1'	'04310: Wnt signaling pathway'	0.0658171	7.0236	7.02717	0.00356665
'CTNND1'	'04520: Adherens junction, 04670: Leukocyte transendothelial migration'	0.349288	7.1682	7.1705	0.00230028
'CTPS'	'00240: Pyrimidine metabolism'	0.00608134	7.03232	7.01275	-0.0195698
'CTSB'	'04612: Antigen processing and presentation'	0.113771	6.91801	6.92565	0.00764005
'CTSG'	'04080: Neuroactive ligand-receptor interaction'	0.0107811	7.04376	7.06135	0.0175923
'CTSL1'	'04612: Antigen processing and presentation'	0.146399	7.00211	6.99807	-0.00403511
'CTTN'	'04530: Tight junction, 05130: Pathogenic Escherichia coli infection - EHEC, 05131: Pathogenic Escherichia coli infection - EPEC'	0.0758785	7.17208	7.1681	-0.0039768
'CUL1'	'04110: Cell cycle, 04120: Ubiquitin mediated proteolysis, 04310: Wnt signaling pathway, 04350: TGF-beta signaling pathway'	0.871799	7.20991	7.20808	-0.0018279
'CUL2'	'04120: Ubiquitin mediated proteolysis'	0.58323	7.0418	7.03879	-0.00301023
'CUL3'	'04120: Ubiquitin mediated proteolysis'	0.628299	7.13284	7.13368	0.000833067
'CX3CL1'	'04060: Cytokine-cytokine receptor interaction'	0.113771	7.0341	7.03065	-0.00344473
'CX3CR1'	'04060: Cytokine-cytokine receptor interaction'	0.383524	7.03974	7.03646	-0.00328367
'CXCL1'	'04060: Cytokine-cytokine receptor interaction, 05120: Epithelial cell signaling in Helicobacter pylori infection'	0.000701837	7.00929	6.88726	-0.122033
'CXCL10'	'04060: Cytokine-cytokine receptor interaction, 04620: Toll-like receptor signaling pathway'	0.349288	6.99419	6.99106	-0.00312461
'CXCL11'	'04060: Cytokine-cytokine receptor interaction, 04620: Toll-like receptor signaling pathway'	0.00174413	7.04168	7.02598	-0.0157042
'CXCL12'	'04060: Cytokine-cytokine receptor interaction, 04360: Axon guidance, 04670: Leukocyte transendothelial migration'	0.00216862	6.96631	7.01023	0.0439202
'CXCL13'	'04060: Cytokine-cytokine receptor interaction, 04670: Leukocyte transendothelial migration'	0.722572	7.0026	7.01263	0.010026
'CXCL2'	'04060: Cytokine-cytokine receptor interaction'	0.383524	7.0317	7.03044	-0.00125953
'CXCL5'	'04060: Cytokine-cytokine receptor interaction'	0.00608134	7.03806	6.963	-0.0750579
'CXCL6'	'04060: Cytokine-cytokine receptor interaction'	0.000701837	7.03104	6.93923	-0.0918149
'CXCL9'	'04060: Cytokine-cytokine receptor interaction, 04620: Toll-like receptor signaling pathway'	0.497916	7.00537	6.99551	-0.0098577
'CXCR3'	'04060: Cytokine-cytokine receptor interaction'	0.185746	7.02586	7.03415	0.00829472
'CXCR4'	'04060: Cytokine-cytokine receptor interaction, 04360: Axon guidance, 04670: Leukocyte transendothelial migration'	0.165192	7.00395	6.99236	-0.011591
'CXXC4'	'04310: Wnt signaling pathway'	0.165192	7.02773	7.02293	-0.00479972
'CYB5R1'	'00530: Aminosugars metabolism'	0.0658171	7.00011	7.01081	0.0106965
'CYB5R3'	'00530: Aminosugars metabolism'	0.457892	6.89455	6.89997	0.00541248
'CYBA'	'04670: Leukocyte transendothelial migration'	0.0997601	7.04931	7.05462	0.00531126
'CYBB'	'04670: Leukocyte transendothelial migration'	0.871799	7.03008	7.02876	-0.00131832
'CYC1'	'00190: Oxidative phosphorylation'	0.232412	6.91749	6.92707	0.00957571
'CYCS'	'04210: Apoptosis, 05210: Colorectal cancer'	0.000340309	6.99491	7.02607	0.0311629
'CYFIP1'	'04810: Regulation of actin cytoskeleton'	0.0758785	7.02378	7.0293	0.00552104
'CYFIP2'	'04810: Regulation of actin cytoskeleton'	0.349288	7.01721	7.02689	0.0096821
'CYP11A1'	'00140: C21-Steroid hormone metabolism'	0.0658171	7.07356	7.06568	-0.00788131
'CYP11B1'	'00140: C21-Steroid hormone metabolism, 00150: Androgen and estrogen metabolism'	0.871799	7.04164	7.04175	0.000103313
'CYP11B2'	'00140: C21-Steroid hormone metabolism, 00150: Androgen and estrogen metabolism'	0.539729	7.04426	7.0435	-0.000765578
'CYP17A1'	'00140: C21-Steroid hormone metabolism'	0.457892	7.04097	7.03842	-0.00255214
'CYP2U1'	'00590: Arachidonic acid metabolism'	0.457892	7.09244	7.09406	0.00161527
'CYP3A4'	'00361: gamma-Hexachlorocyclohexane degradation, 00591: Linoleic acid metabolism, 00980: Metabolism of xenobiotics by cytochrome P450'	1	7.03213	7.03156	-0.000571532
'CYP4F2'	'00590: Arachidonic acid metabolism'	0.087161	6.99614	7.01568	0.0195353
'CYSLTR1'	'04020: Calcium signaling pathway, 04080: Neuroactive ligand-receptor interaction'	0.58323	7.0231	7.02185	-0.00124736
'CYSLTR2'	'04020: Calcium signaling pathway, 04080: Neuroactive ligand-receptor interaction'	0.0420206	7.0362	7.02878	-0.00741508
'Cox7a2'	'00190: Oxidative phosphorylation'	0.0420206	6.82739	6.84979	0.0223963
'DAAM1'	'04310: Wnt signaling pathway'	0.419741	6.99869	6.99935	0.000654145
'DAG1'	'04512: ECM-receptor interaction'	0.722572	6.95952	6.95966	0.000141976
'DAO'	'00260: Glycine, serine and threonine metabolism, 00330: Arginine and proline metabolism, 00472: D-Arginine and D-ornithine metabolism'	0.00407286	7.00319	7.01218	0.00898637
'DARS'	'00252: Alanine and aspartate metabolism, 00970: Aminoacyl-tRNA biosynthesis'	0.258636	6.9517	6.942	-0.0096982
'DARS2'	'00252: Alanine and aspartate metabolism, 00970: Aminoacyl-tRNA biosynthesis'	0.674797	6.99195	6.99201	5.72619e-05
'DAXX'	'04010: MAPK signaling pathway'	0.974253	7.01608	7.01628	0.000201597
'DBF4'	'04110: Cell cycle'	0.0489799	7.00027	6.97579	-0.02448
'DBI'	'03320: PPAR signaling pathway'	0.165192	6.83961	6.85364	0.0140288
'DCC'	'04360: Axon guidance, 05210: Colorectal cancer'	0.821261	7.05458	7.05718	0.0025947
'DCN'	'04350: TGF-beta signaling pathway'	0.539729	6.94659	6.94902	0.00243089
'DCT'	'00350: Tyrosine metabolism, 04916: Melanogenesis'	0.286844	7.03374	7.03848	0.00473395
'DCTD'	'00240: Pyrimidine metabolism'	0.035917	6.95104	6.93954	-0.011502
'DCTN1'	'05040: Huntington''s disease'	0.821261	7.09399	7.09336	-0.000628802
'DDIT3'	'04010: MAPK signaling pathway'	0.871799	6.99198	6.99455	0.00257146
'DDIT4'	'04150: mTOR signaling pathway'	0.000265259	6.95913	6.90654	-0.0525866
'DDOST'	'00510: N-Glycan biosynthesis, 01030: Glycan structures - biosynthesis 1'	0.58323	6.99766	7.00105	0.00338934
'DDX18'	'00500: Starch and sucrose metabolism, 00790: Folate biosynthesis'	0.129287	6.98026	6.96532	-0.0149389
'DDX23'	'00500: Starch and sucrose metabolism, 00790: Folate biosynthesis'	0.146399	7.09835	7.09455	-0.00380325
'DDX4'	'00500: Starch and sucrose metabolism, 00790: Folate biosynthesis'	0.383524	7.03838	7.03302	-0.00536011
'DDX41'	'00500: Starch and sucrose metabolism, 00790: Folate biosynthesis'	0.821261	7.10702	7.10575	-0.00126912
'DDX47'	'00500: Starch and sucrose metabolism, 00790: Folate biosynthesis'	0.349288	7.14578	7.14122	-0.00456406
'DDX50'	'00500: Starch and sucrose metabolism, 00790: Folate biosynthesis'	0.821261	7.05102	7.05143	0.000409387
'DDX54'	'00500: Starch and sucrose metabolism, 00790: Folate biosynthesis'	1	7.01169	7.01187	0.000176682
'DDX56'	'00500: Starch and sucrose metabolism, 00790: Folate biosynthesis'	0.922866	6.96207	6.96612	0.00404366
'DEGS1'	'00600: Sphingolipid metabolism'	0.0219336	6.97531	6.95756	-0.0177448
'DES'	'01430: Cell Communication'	0.871799	7.04346	7.04849	0.00503736
'DFFA'	'04210: Apoptosis'	0.674797	6.98985	6.98892	-0.000934327
'DFFB'	'04210: Apoptosis'	0.771454	7.01399	7.01445	0.000453051
'DGKA'	'00561: Glycerolipid metabolism, 00564: Glycerophospholipid metabolism, 04070: Phosphatidylinositol signaling system'	0.008942	6.9792	6.99075	0.0115508
'DGKB'	'00561: Glycerolipid metabolism, 00564: Glycerophospholipid metabolism, 04070: Phosphatidylinositol signaling system'	1	7.04145	7.04108	-0.000369014
'DGKD'	'00561: Glycerolipid metabolism, 00564: Glycerophospholipid metabolism, 04070: Phosphatidylinositol signaling system'	0.0997601	6.95141	6.96042	0.00900983
'DGKE'	'00561: Glycerolipid metabolism, 00564: Glycerophospholipid metabolism, 04070: Phosphatidylinositol signaling system'	0.457892	7.03874	7.03758	-0.00115885
'DGKG'	'00561: Glycerolipid metabolism, 00564: Glycerophospholipid metabolism, 04070: Phosphatidylinositol signaling system'	0.457892	7.08198	7.08101	-0.000974674
'DGKH'	'00561: Glycerolipid metabolism, 00564: Glycerophospholipid metabolism, 04070: Phosphatidylinositol signaling system'	0.087161	7.01058	7.01873	0.00815516
'DGKQ'	'00561: Glycerolipid metabolism, 00564: Glycerophospholipid metabolism, 04070: Phosphatidylinositol signaling system'	0.258636	7.03917	7.03376	-0.0054043
'DGKZ'	'00561: Glycerolipid metabolism, 00564: Glycerophospholipid metabolism, 04070: Phosphatidylinositol signaling system'	0.419741	7.01511	7.0101	-0.00501704
'DGUOK'	'00230: Purine metabolism'	0.871799	6.98629	6.98642	0.000128128
'DHCR7'	'00100: Biosynthesis of steroids'	0.0489799	7.00763	6.9958	-0.0118343
'DHFR'	'00670: One carbon pool by folate, 00790: Folate biosynthesis'	0.457892	6.97402	6.98334	0.00931375
'DHH'	'04340: Hedgehog signaling pathway'	0.58323	7.03862	7.03947	0.000850561
'DIAPH1'	'04510: Focal adhesion, 04810: Regulation of actin cytoskeleton'	1	7.21662	7.21679	0.000172014
'DIAPH2'	'04810: Regulation of actin cytoskeleton'	0.539729	7.0115	7.01527	0.00376907
'DIAPH3'	'04810: Regulation of actin cytoskeleton'	0.0997601	7.16338	7.15853	-0.00485842
'DKK1'	'04310: Wnt signaling pathway'	0.0305861	7.03488	7.02866	-0.00621395
'DKK2'	'04310: Wnt signaling pathway'	0.232412	7.04321	7.03825	-0.00496288
'DKK4'	'04310: Wnt signaling pathway'	0.258636	7.04353	7.03774	-0.00578403
'DLAT'	'00010: Glycolysis / Gluconeogenesis, 00252: Alanine and aspartate metabolism, 00620: Pyruvate metabolism'	0.0489799	6.94689	6.95859	0.0117044
'DLD'	'00010: Glycolysis / Gluconeogenesis, 00020: Citrate cycle (TCA cycle), 00252: Alanine and aspartate metabolism, 00260: Glycine, serine and threonine metabolism, 00620: Pyruvate metabolism'	0.146399	7.00428	7.00614	0.00185853
'DLL1'	'04330: Notch signaling pathway'	0.871799	7.02836	7.03235	0.00399104
'DLL3'	'04330: Notch signaling pathway'	0.383524	7.0417	7.03968	-0.00201709
'DLL4'	'04330: Notch signaling pathway'	0.000340309	7.0429	7.02753	-0.01537
'DLST'	'00020: Citrate cycle (TCA cycle), 00310: Lysine degradation'	0.457892	7.04873	7.04963	0.000906556
'DNMT1'	'00271: Methionine metabolism'	0.0129492	7.04288	7.03051	-0.0123667
'DNMT3A'	'00271: Methionine metabolism'	0.497916	7.02254	7.02671	0.00417091
'DNMT3B'	'00271: Methionine metabolism'	0.628299	7.02141	7.02131	-9.83191e-05
'DNTT'	'04640: Hematopoietic cell lineage'	0.317059	7.06412	7.0621	-0.00201639
'DOCK1'	'04510: Focal adhesion, 04810: Regulation of actin cytoskeleton'	0.349288	7.1568	7.16294	0.0061397
'DOT1L'	'00310: Lysine degradation'	0.821261	7.04065	7.03931	-0.00133903
'DPM1'	'00510: N-Glycan biosynthesis'	0.419741	7.06129	7.06048	-0.000807102
'DPYS'	'00240: Pyrimidine metabolism, 00410: beta-Alanine metabolism, 00770: Pantothenate and CoA biosynthesis'	0.771454	7.03778	7.0355	-0.00228094
'DPYSL2'	'04360: Axon guidance'	0.00738835	7.06374	7.05669	-0.0070491
'DPYSL5'	'04360: Axon guidance'	0.674797	7.03509	7.03775	0.00265765
'DRD1'	'04020: Calcium signaling pathway, 04080: Neuroactive ligand-receptor interaction, 04540: Gap junction'	0.056882	7.05475	7.04573	-0.00901129
'DRD2'	'04080: Neuroactive ligand-receptor interaction, 04540: Gap junction'	0.674797	7.03634	7.03304	-0.00329118
'DRD3'	'04080: Neuroactive ligand-receptor interaction'	0.419741	7.04616	7.03785	-0.00831117
'DRD4'	'04080: Neuroactive ligand-receptor interaction'	0.974253	7.03307	7.03704	0.00396836
'DRD5'	'04080: Neuroactive ligand-receptor interaction'	0.208132	7.01325	7.01787	0.00461978
'DSC1'	'01430: Cell Communication'	0.185746	7.04586	7.04118	-0.00468596
'DSC2'	'01430: Cell Communication'	0.00608134	6.90408	6.9301	0.0260216
'DSC3'	'01430: Cell Communication'	0.232412	7.03824	7.03331	-0.00492952
'DSG1'	'01430: Cell Communication'	0.286844	7.11315	7.11179	-0.00136501
'DSG2'	'01430: Cell Communication'	0.00331391	6.86425	6.88027	0.0160187
'DSG3'	'01430: Cell Communication'	0.0997601	7.04104	7.03454	-0.00649523
'DTX1'	'04330: Notch signaling pathway'	0.539729	7.0441	7.04461	0.000517346
'DTX2'	'04330: Notch signaling pathway'	0.349288	6.99758	6.99488	-0.0027011
'DTX3'	'04330: Notch signaling pathway'	0.457892	7.03729	7.03466	-0.00263485
'DTX3L'	'04330: Notch signaling pathway'	0.317059	6.93027	6.92897	-0.00129446
'DTYMK'	'00240: Pyrimidine metabolism'	0.722572	7.19697	7.19408	-0.00288684
'DUSP1'	'04010: MAPK signaling pathway'	0.146399	7.00995	7.01815	0.00820514
'DUSP10'	'04010: MAPK signaling pathway'	0.00174413	7.01586	7.00357	-0.0122881
'DUSP14'	'04010: MAPK signaling pathway'	0.00174413	7.02104	6.99192	-0.0291184
'DUSP16'	'04010: MAPK signaling pathway'	0.771454	7.0222	7.0235	0.00130958
'DUSP2'	'04010: MAPK signaling pathway'	0.00608134	7.04475	7.02465	-0.020092
'DUSP3'	'04010: MAPK signaling pathway'	0.722572	6.98843	6.988	-0.000431324
'DUSP4'	'04010: MAPK signaling pathway'	0.00139729	7.04589	7.02504	-0.0208503
'DUSP5'	'04010: MAPK signaling pathway'	0.628299	6.95956	6.97308	0.0135276
'DUSP6'	'04010: MAPK signaling pathway'	0.113771	6.93799	6.92884	-0.00914979
'DUSP7'	'04010: MAPK signaling pathway'	0.146399	7.0448	7.03857	-0.00622912
'DUSP8'	'04010: MAPK signaling pathway'	0.674797	6.99774	6.99777	3.56077e-05
'DUT'	'00240: Pyrimidine metabolism'	0.113771	6.90124	6.91738	0.0161379
'DVL1'	'04310: Wnt signaling pathway, 04330: Notch signaling pathway, 04916: Melanogenesis, 05210: Colorectal cancer, 05217: Basal cell carcinoma'	0.674797	6.99711	6.99615	-0.000964467
'DVL2'	'04310: Wnt signaling pathway, 04330: Notch signaling pathway, 04916: Melanogenesis, 05210: Colorectal cancer, 05217: Basal cell carcinoma'	0.232412	7.03919	7.04259	0.00340861
'DVL3'	'04310: Wnt signaling pathway, 04330: Notch signaling pathway, 04916: Melanogenesis, 05210: Colorectal cancer, 05217: Basal cell carcinoma'	0.146399	6.99614	7.00084	0.00469701
'DZIP3'	'00380: Tryptophan metabolism'	0.383524	7.03656	7.03946	0.00290033
'E2F1'	'04110: Cell cycle, 05212: Pancreatic cancer, 05214: Glioma, 05218: Melanoma, 05220: Chronic myeloid leukemia'	0.58323	7.06459	7.06224	-0.00234951
'E2F3'	'04110: Cell cycle, 05212: Pancreatic cancer, 05214: Glioma, 05218: Melanoma, 05220: Chronic myeloid leukemia'	0.0305861	7.00667	6.99826	-0.00841281
'E2F4'	'04110: Cell cycle, 04350: TGF-beta signaling pathway'	0.165192	6.98503	6.98749	0.00246333
'E2F5'	'04110: Cell cycle, 04350: TGF-beta signaling pathway'	0.771454	7.05068	7.0495	-0.0011822
'ECH1'	'00350: Tyrosine metabolism, 00362: Benzoate degradation via hydroxylation, 00628: Fluorene degradation'	0.00139729	7.04287	7.06148	0.0186059
'ECHS1'	'00062: Fatty acid elongation in mitochondria, 00071: Fatty acid metabolism, 00280: Valine, leucine and isoleucine degradation, 00310: Lysine degradation, 00380: Tryptophan metabolism, 00410: beta-Alanine metabolism, 00632: Benzoate degradation via CoA ligation, 00640: Propanoate metabolism, 00650: Butanoate metabolism, 00903: Limonene and pinene degradation, 00930: Caprolactam degradation'	0.008942	6.8657	6.87975	0.0140476
'ECSIT'	'04010: MAPK signaling pathway'	0.00738835	6.99721	7.01317	0.0159617
'EDA'	'04060: Cytokine-cytokine receptor interaction'	0.722572	7.03794	7.03831	0.000361449
'EDA2R'	'04060: Cytokine-cytokine receptor interaction'	0.821261	7.04312	7.0408	-0.0023243
'EDAR'	'04060: Cytokine-cytokine receptor interaction'	0.208132	7.0006	7.006	0.00539279
'EDEM1'	'00520: Nucleotide sugars metabolism, 00530: Aminosugars metabolism'	0.722572	7.00193	6.9978	-0.00413592
'EDN1'	'04080: Neuroactive ligand-receptor interaction, 04916: Melanogenesis'	0.0184697	6.96805	6.99294	0.0248918
'EDN2'	'04080: Neuroactive ligand-receptor interaction'	0.771454	7.03951	7.0379	-0.00161197
'EDN3'	'04080: Neuroactive ligand-receptor interaction'	0.008942	6.97672	6.99739	0.0206734
'EDNRA'	'04020: Calcium signaling pathway, 04080: Neuroactive ligand-receptor interaction'	0.00216862	7.04999	7.02154	-0.0284489
'EDNRB'	'04020: Calcium signaling pathway, 04080: Neuroactive ligand-receptor interaction, 04916: Melanogenesis'	0.185746	6.99212	6.99755	0.00543971
'EFNA1'	'04360: Axon guidance'	0.539729	6.95229	6.95716	0.00486674
'EFNA2'	'04360: Axon guidance'	0.0658171	7.05015	7.04723	-0.00292682
'EFNA3'	'04360: Axon guidance'	0.771454	7.00117	6.99898	-0.00218301
'EFNA4'	'04360: Axon guidance'	0.497916	6.99049	6.9966	0.00611078
'EFNA5'	'04360: Axon guidance'	0.871799	7.05326	7.05078	-0.00247495
'EFNB1'	'04360: Axon guidance'	0.383524	7.00668	7.01031	0.00363361
'EFNB2'	'04360: Axon guidance'	0.056882	6.90999	6.92087	0.0108797
'EFNB3'	'04360: Axon guidance'	0.974253	7.02489	7.02778	0.00289792
'EGF'	'04010: MAPK signaling pathway, 04060: Cytokine-cytokine receptor interaction, 04510: Focal adhesion, 04540: Gap junction, 04810: Regulation of actin cytoskeleton, 05212: Pancreatic cancer, 05214: Glioma, 05218: Melanoma'	0.922866	7.08421	7.08646	0.00225351
'EGFR'	'04010: MAPK signaling pathway, 04020: Calcium signaling pathway, 04060: Cytokine-cytokine receptor interaction, 04320: Dorso-ventral axis formation, 04510: Focal adhesion, 04520: Adherens junction, 04540: Gap junction, 04810: Regulation of actin cytoskeleton, 04912: GnRH signaling pathway, 05120: Epithelial cell signaling in Helicobacter pylori infection, 05210: Colorectal cancer, 05212: Pancrea…	0.58323	7.19679	7.20249	0.00570531
'EGLN1'	'00904: Diterpenoid biosynthesis'	0.497916	6.99163	6.99562	0.00399652
'EGLN3'	'00904: Diterpenoid biosynthesis'	0.056882	6.94222	6.96589	0.0236674
'EHHADH'	'00071: Fatty acid metabolism, 00280: Valine, leucine and isoleucine degradation, 00310: Lysine degradation, 00380: Tryptophan metabolism, 00410: beta-Alanine metabolism, 00632: Benzoate degradation via CoA ligation, 00640: Propanoate metabolism, 00650: Butanoate metabolism, 00903: Limonene and pinene degradation, 00930: Caprolactam degradation, 03320: PPAR signaling pathway'	0.0420206	7.05851	7.0677	0.00919106
'EHMT1'	'00310: Lysine degradation'	0.722572	7.13824	7.13739	-0.000850055
'EHMT2'	'00310: Lysine degradation'	0.0758785	7.04277	7.04839	0.00562549
'EIF4B'	'04150: mTOR signaling pathway'	0.146399	7.00777	7.01164	0.00386996
'EIF4E'	'04150: mTOR signaling pathway, 04910: Insulin signaling pathway'	0.722572	6.9722	6.97645	0.00424749
'EIF4E2'	'04150: mTOR signaling pathway, 04910: Insulin signaling pathway'	0.000701837	6.96635	6.98468	0.0183262
'EIF4EBP1'	'04150: mTOR signaling pathway, 04910: Insulin signaling pathway'	0.113771	6.98289	6.96387	-0.0190184
'ELK1'	'04010: MAPK signaling pathway, 04510: Focal adhesion, 04910: Insulin signaling pathway, 04912: GnRH signaling pathway'	0.0259496	7.01263	7.00686	-0.00576752
'ELK4'	'04010: MAPK signaling pathway'	0.0658171	7.04225	7.03902	-0.0032296
'ENDOG'	'04210: Apoptosis'	0.056882	6.9802	6.98739	0.00718221
'ENO1'	'00010: Glycolysis / Gluconeogenesis, 00400: Phenylalanine, tyrosine and tryptophan biosynthesis'	0.457892	6.96014	6.95117	-0.00897129
'ENO2'	'00010: Glycolysis / Gluconeogenesis, 00400: Phenylalanine, tyrosine and tryptophan biosynthesis'	0.497916	7.02216	7.01722	-0.00494281
'ENO3'	'00010: Glycolysis / Gluconeogenesis, 00400: Phenylalanine, tyrosine and tryptophan biosynthesis'	0.974253	7.09715	7.09724	9.87387e-05
'ENPP1'	'00230: Purine metabolism, 00500: Starch and sucrose metabolism, 00740: Riboflavin metabolism, 00760: Nicotinate and nicotinamide metabolism, 00770: Pantothenate and CoA biosynthesis'	0.871799	7.02807	7.03186	0.00378714
'ENTPD2'	'00230: Purine metabolism'	0.258636	7.04209	7.04095	-0.00114994
'ENTPD5'	'00230: Purine metabolism, 00240: Pyrimidine metabolism'	0.00331391	6.95744	6.99334	0.0358988
'EP300'	'01510: Neurodegenerative Disorders, 04110: Cell cycle, 04310: Wnt signaling pathway, 04330: Notch signaling pathway, 04350: TGF-beta signaling pathway, 04520: Adherens junction, 04630: Jak-STAT signaling pathway, 04720: Long-term potentiation, 04916: Melanogenesis, 05040: Huntington''s disease'	0.821261	7.10044	7.10033	-0.00010792
'EP400'	'00500: Starch and sucrose metabolism, 00790: Folate biosynthesis'	0.974253	7.12531	7.12468	-0.000622854
'EPB41'	'04530: Tight junction'	0.317059	7.04162	7.03605	-0.00557697
'EPB41L1'	'04530: Tight junction'	0.974253	7.06889	7.06904	0.000149984
'EPB41L2'	'04530: Tight junction'	0.58323	7.05074	7.05034	-0.000404047
'EPB41L3'	'04530: Tight junction'	0.087161	7.08334	7.10252	0.0191817
'EPHA1'	'04360: Axon guidance'	0.58323	7.04173	7.04029	-0.0014491
'EPHA2'	'04360: Axon guidance'	0.00608134	7.02377	6.99826	-0.0255128
'EPHA3'	'04360: Axon guidance'	0.58323	7.04599	7.05365	0.00766009
'EPHA4'	'04360: Axon guidance'	0.922866	7.03628	7.03572	-0.000555165
'EPHA5'	'04360: Axon guidance'	1	7.04605	7.0452	-0.000851347
'EPHA6'	'04360: Axon guidance'	0.821261	7.03822	7.039	0.000775616
'EPHA7'	'04360: Axon guidance'	0.974253	7.04322	7.04343	0.000201338
'EPHA8'	'04360: Axon guidance'	0.628299	7.03751	7.04088	0.00337568
'EPHB1'	'04360: Axon guidance'	0.056882	7.05242	7.04356	-0.00885567
'EPHB2'	'04360: Axon guidance'	0.722572	7.00874	7.00322	-0.00551735
'EPHB3'	'04360: Axon guidance'	0.539729	6.96891	6.97391	0.00500049
'EPHB4'	'04360: Axon guidance'	0.539729	6.99227	6.99037	-0.00189748
'EPHB6'	'04360: Axon guidance'	0.0997601	7.0189	7.0239	0.0050036
'EPO'	'04060: Cytokine-cytokine receptor interaction, 04630: Jak-STAT signaling pathway, 04640: Hematopoietic cell lineage'	0.674797	7.05908	7.05852	-0.000557608
'EPOR'	'04060: Cytokine-cytokine receptor interaction, 04630: Jak-STAT signaling pathway, 04640: Hematopoietic cell lineage'	0.628299	7.06647	7.06511	-0.00136095
'EPRS'	'00251: Glutamate metabolism, 00330: Arginine and proline metabolism, 00860: Porphyrin and chlorophyll metabolism, 00970: Aminoacyl-tRNA biosynthesis'	0.056882	7.01095	7.00603	-0.00491531
'EPX'	'00360: Phenylalanine metabolism, 00680: Methane metabolism, 00940: Stilbene, coumarine and lignin biosynthesis'	0.317059	7.02643	7.03067	0.00423749
'ERBB2'	'04020: Calcium signaling pathway, 04320: Dorso-ventral axis formation, 04510: Focal adhesion, 04520: Adherens junction, 05212: Pancreatic cancer'	0.497916	7.091	7.09795	0.00694669
'ERBB3'	'04020: Calcium signaling pathway'	0.539729	7.02456	7.02481	0.000248028
'ERBB4'	'04020: Calcium signaling pathway, 04320: Dorso-ventral axis formation'	0.539729	7.06601	7.06955	0.00353394
'ERCC2'	'00500: Starch and sucrose metabolism, 00790: Folate biosynthesis'	0.146399	7.05795	7.0542	-0.00374648
'ERCC3'	'00500: Starch and sucrose metabolism, 00790: Folate biosynthesis'	0.0219336	7.02881	7.02311	-0.00570288
'ERO1L'	'05110: Cholera - Infection'	0.00111506	6.978	6.95145	-0.0265522
'ESCO1'	'00280: Valine, leucine and isoleucine degradation, 00350: Tyrosine metabolism, 00360: Phenylalanine metabolism, 00564: Glycerophospholipid metabolism, 00624: 1- and 2-Methylnaphthalene degradation, 00632: Benzoate degradation via CoA ligation, 00642: Ethylbenzene degradation, 00903: Limonene and pinene degradation, 00960: Alkaloid biosynthesis II'	0.146399	7.01718	7.02149	0.00430949
'ESCO2'	'00280: Valine, leucine and isoleucine degradation, 00350: Tyrosine metabolism, 00360: Phenylalanine metabolism, 00564: Glycerophospholipid metabolism, 00624: 1- and 2-Methylnaphthalene degradation, 00632: Benzoate degradation via CoA ligation, 00642: Ethylbenzene degradation, 00903: Limonene and pinene degradation, 00960: Alkaloid biosynthesis II'	0.821261	7.04542	7.04587	0.000454309
'ETS1'	'04320: Dorso-ventral axis formation'	0.539729	7.03755	7.03031	-0.00723919
'ETS2'	'04320: Dorso-ventral axis formation'	1	6.9692	6.96188	-0.00731984
'ETV6'	'04320: Dorso-ventral axis formation'	0.58323	7.20695	7.20971	0.00276726
'EXOC3'	'04530: Tight junction'	0.349288	7.11287	7.11624	0.00336808
'EXOC4'	'04530: Tight junction'	0.674797	7.2243	7.2271	0.00279773
'EXOC7'	'04910: Insulin signaling pathway'	0.922866	7.15139	7.15347	0.0020797
'EXT1'	'00534: Heparan sulfate biosynthesis, 01030: Glycan structures - biosynthesis 1'	0.0305861	7.011	7.02321	0.0122154
'EXT2'	'00534: Heparan sulfate biosynthesis, 01030: Glycan structures - biosynthesis 1'	0.0758785	6.97261	6.96651	-0.00609875
'EXTL3'	'00534: Heparan sulfate biosynthesis, 01030: Glycan structures - biosynthesis 1'	0.0658171	7.02766	7.02113	-0.00653523
'F10'	'04610: Complement and coagulation cascades'	0.457892	7.04533	7.04443	-0.000899977
'F11'	'04610: Complement and coagulation cascades'	0.497916	7.04454	7.04116	-0.00337377
'F11R'	'04514: Cell adhesion molecules (CAMs), 04530: Tight junction, 04670: Leukocyte transendothelial migration, 05120: Epithelial cell signaling in Helicobacter pylori infection'	0.0219336	6.9254	6.94686	0.0214642
'F12'	'04610: Complement and coagulation cascades'	0.0658171	7.00868	6.99748	-0.0112063
'F13A1'	'04610: Complement and coagulation cascades'	0.00407286	6.94514	6.99549	0.050347
'F13B'	'04610: Complement and coagulation cascades'	0.258636	7.01984	7.00602	-0.0138276
'F2'	'04080: Neuroactive ligand-receptor interaction, 04610: Complement and coagulation cascades, 04810: Regulation of actin cytoskeleton'	0.58323	7.0934	7.09178	-0.00162441
'F2R'	'04020: Calcium signaling pathway, 04080: Neuroactive ligand-receptor interaction, 04610: Complement and coagulation cascades, 04810: Regulation of actin cytoskeleton'	0.722572	7.01374	7.01589	0.00215438
'F2RL1'	'04080: Neuroactive ligand-receptor interaction'	0.00174413	6.89635	6.92481	0.0284595
'F2RL2'	'04080: Neuroactive ligand-receptor interaction'	0.0305861	7.06341	7.05468	-0.00873189
'F2RL3'	'04080: Neuroactive ligand-receptor interaction'	0.419741	7.03685	7.03564	-0.0012158
'F3'	'04610: Complement and coagulation cascades'	0.771454	6.92823	6.93406	0.00583827
'F5'	'04610: Complement and coagulation cascades'	0.185746	7.03765	7.02954	-0.00811064
'F7'	'04610: Complement and coagulation cascades'	0.317059	7.0629	7.06746	0.00455803
'F8'	'04610: Complement and coagulation cascades'	0.497916	7.01352	7.00992	-0.0036025
'F9'	'04610: Complement and coagulation cascades'	0.286844	7.04374	7.04753	0.0037902
'FABP1'	'03320: PPAR signaling pathway'	0.0259496	6.99403	7.01809	0.0240576
'FABP3'	'03320: PPAR signaling pathway'	0.821261	7.03512	7.03804	0.00292556
'FABP4'	'03320: PPAR signaling pathway'	0.419741	7.03973	7.04156	0.00182337
'FABP5'	'03320: PPAR signaling pathway'	0.113771	6.88005	6.89136	0.0113068
'FABP6'	'03320: PPAR signaling pathway'	0.113771	7.04535	7.04034	-0.00501593
'FADD'	'04210: Apoptosis, 04620: Toll-like receptor signaling pathway'	0.383524	7.00842	7.01247	0.00404617
'FADS1'	'00591: Linoleic acid metabolism'	0.0219336	7.03747	7.01703	-0.0204401
'FAH'	'00350: Tyrosine metabolism, 00643: Styrene degradation'	0.771454	7.03044	7.02873	-0.00171294
'FANCL'	'00380: Tryptophan metabolism'	0.58323	6.99803	6.99702	-0.00100746
'FARP2'	'04510: Focal adhesion, 04520: Adherens junction'	0.0184697	7.01417	7.02348	0.00930579
'FARS2'	'00400: Phenylalanine, tyrosine and tryptophan biosynthesis, 00970: Aminoacyl-tRNA biosynthesis'	0.871799	7.08902	7.08878	-0.000246605
'FARSA'	'00400: Phenylalanine, tyrosine and tryptophan biosynthesis, 00970: Aminoacyl-tRNA biosynthesis'	0.349288	6.9638	6.96155	-0.00225477
'FARSB'	'00400: Phenylalanine, tyrosine and tryptophan biosynthesis, 00970: Aminoacyl-tRNA biosynthesis'	0.0758785	7.00833	7.01671	0.00838445
'FAS'	'04010: MAPK signaling pathway, 04060: Cytokine-cytokine receptor interaction, 04210: Apoptosis, 04650: Natural killer cell mediated cytotoxicity, 04940: Type I diabetes mellitus'	0.129287	6.99439	7.00381	0.00942152
'FASLG'	'04010: MAPK signaling pathway, 04060: Cytokine-cytokine receptor interaction, 04210: Apoptosis, 04650: Natural killer cell mediated cytotoxicity, 04940: Type I diabetes mellitus'	0.208132	7.07093	7.07336	0.00242453
'FASN'	'00061: Fatty acid biosynthesis, 04910: Insulin signaling pathway'	0.146399	7.18557	7.17717	-0.00840182
'FAU'	'03010: Ribosome'	0.0758785	6.81884	6.83188	0.0130353
'FBP1'	'00010: Glycolysis / Gluconeogenesis, 00030: Pentose phosphate pathway, 00051: Fructose and mannose metabolism, 00710: Carbon fixation, 04910: Insulin signaling pathway'	0.0305861	6.94465	6.95181	0.00716334
'FBXO18'	'00500: Starch and sucrose metabolism, 00790: Folate biosynthesis'	0.922866	7.02928	7.02802	-0.00125746
'FBXW11'	'04120: Ubiquitin mediated proteolysis, 04310: Wnt signaling pathway, 04340: Hedgehog signaling pathway'	0.232412	7.02499	7.01997	-0.00502559
'FBXW7'	'01510: Neurodegenerative Disorders, 04120: Ubiquitin mediated proteolysis'	0.286844	7.01902	7.01346	-0.00555789
'FCER1A'	'04664: Fc epsilon RI signaling pathway'	0.00331391	7.04221	7.05918	0.0169722
'FCER1G'	'04650: Natural killer cell mediated cytotoxicity, 04664: Fc epsilon RI signaling pathway'	0.871799	6.9751	6.97781	0.0027106
'FCER2'	'04640: Hematopoietic cell lineage'	0.0658171	7.05242	7.04417	-0.00824638
'FCGR1A'	'04640: Hematopoietic cell lineage'	0.113771	7.04409	7.03826	-0.00582749
'FCGR2B'	'04662: B cell receptor signaling pathway'	0.871799	7.02537	7.02716	0.0017819
'FDFT1'	'00100: Biosynthesis of steroids, 00900: Terpenoid biosynthesis'	0.0305861	7.06488	7.07501	0.0101253
'FDPS'	'00100: Biosynthesis of steroids, 00900: Terpenoid biosynthesis'	0.0489799	6.9858	6.99591	0.0101067
'FECH'	'00860: Porphyrin and chlorophyll metabolism'	0.0758785	7.0002	7.0048	0.00459769
'FER'	'04520: Adherens junction'	0.146399	7.06662	7.05918	-0.0074374
'FES'	'04360: Axon guidance'	0.0997601	7.06246	7.05512	-0.00733269
'FGA'	'04610: Complement and coagulation cascades'	0.419741	7.0921	7.08559	-0.00651342
'FGB'	'04610: Complement and coagulation cascades'	0.383524	7.05752	7.054	-0.00351833
'FGD1'	'04810: Regulation of actin cytoskeleton'	0.871799	7.00613	7.00624	0.000107223
'FGF1'	'04010: MAPK signaling pathway, 04810: Regulation of actin cytoskeleton, 05218: Melanoma'	0.771454	7.04348	7.04555	0.00207344
'FGF10'	'04010: MAPK signaling pathway, 04810: Regulation of actin cytoskeleton, 05218: Melanoma'	0.497916	7.04469	7.04026	-0.00443383
'FGF13'	'04010: MAPK signaling pathway, 04810: Regulation of actin cytoskeleton, 05218: Melanoma'	0.628299	7.01694	7.01355	-0.0033835
'FGF17'	'04010: MAPK signaling pathway, 04810: Regulation of actin cytoskeleton, 05218: Melanoma'	0.539729	7.04135	7.04027	-0.00108099
'FGF18'	'04010: MAPK signaling pathway, 04810: Regulation of actin cytoskeleton, 05218: Melanoma'	0.722572	7.04381	7.04208	-0.00172695
'FGF19'	'04010: MAPK signaling pathway, 04810: Regulation of actin cytoskeleton, 05218: Melanoma'	0.165192	7.04405	7.038	-0.00605184
'FGF2'	'04010: MAPK signaling pathway, 04810: Regulation of actin cytoskeleton, 05218: Melanoma'	0.0184697	7.05701	7.04692	-0.0100968
'FGF23'	'04010: MAPK signaling pathway, 04810: Regulation of actin cytoskeleton, 05218: Melanoma'	0.722572	7.0429	7.03849	-0.00441215
'FGF3'	'04010: MAPK signaling pathway, 04810: Regulation of actin cytoskeleton, 05218: Melanoma'	0.0658171	7.04737	7.0398	-0.00756981
'FGF4'	'04010: MAPK signaling pathway, 04810: Regulation of actin cytoskeleton, 05218: Melanoma'	0.974253	7.03381	7.03054	-0.00327275
'FGF5'	'04010: MAPK signaling pathway, 04810: Regulation of actin cytoskeleton, 05218: Melanoma'	0.539729	7.04439	7.04114	-0.0032505
'FGF6'	'04010: MAPK signaling pathway, 04810: Regulation of actin cytoskeleton, 05218: Melanoma'	0.0997601	7.01978	7.02939	0.0096034
'FGF7'	'04010: MAPK signaling pathway, 04810: Regulation of actin cytoskeleton, 05218: Melanoma'	0.457892	7.05207	7.04673	-0.00533584
'FGF8'	'04010: MAPK signaling pathway, 04810: Regulation of actin cytoskeleton, 05218: Melanoma'	0.087161	7.04676	7.0416	-0.00515889
'FGF9'	'04010: MAPK signaling pathway, 04810: Regulation of actin cytoskeleton, 05218: Melanoma'	0.035917	6.98899	7.00206	0.0130748
'FGFR1'	'04010: MAPK signaling pathway, 04520: Adherens junction, 04810: Regulation of actin cytoskeleton, 05218: Melanoma'	0.208132	7.0397	7.04157	0.00187134
'FGFR2'	'04010: MAPK signaling pathway, 04810: Regulation of actin cytoskeleton'	0.457892	7.06509	7.06274	-0.00234681
'FGFR3'	'04010: MAPK signaling pathway, 04810: Regulation of actin cytoskeleton'	0.000340309	6.99872	7.0203	0.0215803
'FGFR4'	'04010: MAPK signaling pathway, 04810: Regulation of actin cytoskeleton'	0.208132	7.03783	7.03045	-0.00737248
'FGG'	'04610: Complement and coagulation cascades'	0.129287	7.04077	7.03193	-0.00884547
'FH'	'00020: Citrate cycle (TCA cycle), 00720: Reductive carboxylate cycle (CO2 fixation)'	0.539729	6.98444	6.98818	0.00373581
'FHIT'	'00230: Purine metabolism'	0.722572	7.02652	7.02965	0.00313235
'FIGF'	'04150: mTOR signaling pathway, 04510: Focal adhesion, 05212: Pancreatic cancer'	0.286844	7.04127	7.04629	0.00502301
'FLAD1'	'00740: Riboflavin metabolism'	0.674797	7.04012	7.04083	0.000716047
'FLNA'	'04010: MAPK signaling pathway, 04510: Focal adhesion'	0.0107811	7.17471	7.16561	-0.00910704
'FLNB'	'04010: MAPK signaling pathway, 04510: Focal adhesion'	0.00407286	7.03697	7.06588	0.0289111
'FLNC'	'04010: MAPK signaling pathway, 04510: Focal adhesion'	0.286844	7.12132	7.11793	-0.0033886
'FLOT1'	'04910: Insulin signaling pathway'	0.922866	6.9966	6.99151	-0.00508278
'FLOT2'	'04910: Insulin signaling pathway'	0.771454	6.97755	6.97469	-0.00286587
'FLT1'	'04060: Cytokine-cytokine receptor interaction, 04510: Focal adhesion'	0.00111506	7.03786	7.01645	-0.0214126
'FLT3'	'04060: Cytokine-cytokine receptor interaction, 04640: Hematopoietic cell lineage'	0.457892	7.0477	7.04303	-0.00467222
'FLT3LG'	'04060: Cytokine-cytokine receptor interaction, 04640: Hematopoietic cell lineage'	0.628299	7.04195	7.04048	-0.00146804
'FLT4'	'04060: Cytokine-cytokine receptor interaction'	0.00738835	7.05637	7.04584	-0.0105261
'FN1'	'01430: Cell Communication, 04510: Focal adhesion, 04512: ECM-receptor interaction, 04810: Regulation of actin cytoskeleton'	0.0658171	7.12477	7.11762	-0.00715336
'FNDC5'	'04512: ECM-receptor interaction'	0.00608134	7.04822	7.04206	-0.00616414
'FOS'	'04010: MAPK signaling pathway, 04620: Toll-like receptor signaling pathway, 04660: T cell receptor signaling pathway, 04662: B cell receptor signaling pathway, 05210: Colorectal cancer'	0.129287	7.04824	7.02306	-0.0251853
'FOSL1'	'04310: Wnt signaling pathway'	0.0305861	7.08255	7.06386	-0.0186831
'FOXA2'	'04950: Maturity onset diabetes of the young'	1	7.00914	7.01032	0.00118209
'FOXA3'	'04950: Maturity onset diabetes of the young'	0.58323	6.93414	6.93228	-0.00185995
'FPR1'	'04080: Neuroactive ligand-receptor interaction'	0.0219336	7.03401	7.01782	-0.016188
'FRAT1'	'04310: Wnt signaling pathway'	0.056882	6.99761	7.01173	0.0141118
'FRAT2'	'04310: Wnt signaling pathway'	0.008942	6.93211	6.94524	0.0131283
'FSHB'	'04080: Neuroactive ligand-receptor interaction, 04912: GnRH signaling pathway'	0.497916	7.03629	7.03479	-0.00150609
'FSHR'	'04080: Neuroactive ligand-receptor interaction'	1	7.04808	7.04871	0.000621435
'FST'	'04350: TGF-beta signaling pathway'	0.113771	7.03367	7.02179	-0.0118754
'FTH1'	'00860: Porphyrin and chlorophyll metabolism'	0.00268598	6.85102	6.88529	0.034273
'FUT1'	'00601: Glycosphingolipid biosynthesis - lactoseries, 00602: Glycosphingolipid biosynthesis - neo-lactoseries, 00603: Glycosphingolipid biosynthesis - globoseries, 01031: Glycan structures - biosynthesis 2'	0.771454	7.00783	7.00867	0.00083729
'FUT4'	'00602: Glycosphingolipid biosynthesis - neo-lactoseries, 01031: Glycan structures - biosynthesis 2'	0.232412	6.99507	6.99902	0.00395321
'FYN'	'04360: Axon guidance, 04510: Focal adhesion, 04520: Adherens junction, 04650: Natural killer cell mediated cytotoxicity, 04660: T cell receptor signaling pathway, 04664: Fc epsilon RI signaling pathway, 05130: Pathogenic Escherichia coli infection - EHEC, 05131: Pathogenic Escherichia coli infection - EPEC'	0.497916	7.21153	7.20848	-0.00305553
'FZD1'	'04310: Wnt signaling pathway, 04916: Melanogenesis, 05210: Colorectal cancer, 05217: Basal cell carcinoma'	0.00268598	6.99541	7.00793	0.0125131
'FZD10'	'04310: Wnt signaling pathway, 04916: Melanogenesis, 05210: Colorectal cancer, 05217: Basal cell carcinoma'	0.771454	7.0291	7.02668	-0.00241861
'FZD2'	'04310: Wnt signaling pathway, 04916: Melanogenesis, 05210: Colorectal cancer, 05217: Basal cell carcinoma'	0.0154943	7.04309	7.03293	-0.0101534
'FZD4'	'04310: Wnt signaling pathway, 04916: Melanogenesis, 05210: Colorectal cancer, 05217: Basal cell carcinoma'	0.922866	7.0296	7.03091	0.00131207
'FZD5'	'04310: Wnt signaling pathway, 04916: Melanogenesis, 05210: Colorectal cancer, 05217: Basal cell carcinoma'	0.000265259	6.95035	6.98684	0.036496
'FZD6'	'04310: Wnt signaling pathway, 04916: Melanogenesis, 05210: Colorectal cancer, 05217: Basal cell carcinoma'	0.0420206	6.98768	6.97503	-0.0126457
'FZD7'	'04310: Wnt signaling pathway, 04916: Melanogenesis, 05210: Colorectal cancer, 05217: Basal cell carcinoma'	0.146399	6.99574	6.99989	0.00414876
'FZD8'	'04310: Wnt signaling pathway, 04916: Melanogenesis, 05210: Colorectal cancer, 05217: Basal cell carcinoma'	0.457892	7.02269	7.02432	0.00162932
'FZD9'	'04310: Wnt signaling pathway, 04916: Melanogenesis, 05210: Colorectal cancer, 05217: Basal cell carcinoma'	0.286844	7.04501	7.04348	-0.00153359
'FZR1'	'04110: Cell cycle, 04120: Ubiquitin mediated proteolysis'	0.771454	7.13811	7.13753	-0.000582622
'G6PC'	'00010: Glycolysis / Gluconeogenesis, 00052: Galactose metabolism, 00500: Starch and sucrose metabolism, 04910: Insulin signaling pathway, 04920: Adipocytokine signaling pathway'	0.58323	7.03902	7.04269	0.0036671
'G6PD'	'00030: Pentose phosphate pathway, 00480: Glutathione metabolism'	0.00268598	7.06973	7.04704	-0.0226934
'GAA'	'00052: Galactose metabolism, 00500: Starch and sucrose metabolism'	0.383524	6.95271	6.95492	0.00220842
'GAB2'	'04664: Fc epsilon RI signaling pathway, 05220: Chronic myeloid leukemia'	0.722572	7.12182	7.12224	0.000418852
'GABARAP'	'04140: Regulation of autophagy'	0.00498637	6.84897	6.86586	0.0168884
'GABARAPL1'	'04140: Regulation of autophagy'	0.58323	7.00861	7.01439	0.00577818
'GABBR1'	'04080: Neuroactive ligand-receptor interaction'	0.0219336	7.04978	7.05651	0.00672722
'GABBR2'	'04080: Neuroactive ligand-receptor interaction'	0.722572	7.03738	7.03747	9.52823e-05
'GABRA1'	'04080: Neuroactive ligand-receptor interaction'	0.771454	7.06383	7.06153	-0.00230238
'GABRA3'	'04080: Neuroactive ligand-receptor interaction'	0.539729	7.04569	7.04614	0.000447725
'GABRA4'	'04080: Neuroactive ligand-receptor interaction'	0.0658171	7.04132	7.03203	-0.00929357
'GABRA6'	'04080: Neuroactive ligand-receptor interaction'	0.129287	7.04657	7.04196	-0.00461329
'GABRB1'	'04080: Neuroactive ligand-receptor interaction'	0.258636	7.0428	7.04234	-0.000456533
'GABRB2'	'04080: Neuroactive ligand-receptor interaction'	0.539729	7.04405	7.03877	-0.00527333
'GABRB3'	'04080: Neuroactive ligand-receptor interaction'	0.628299	7.04702	7.04343	-0.00358565
'GABRG1'	'04080: Neuroactive ligand-receptor interaction'	0.974253	7.04588	7.04753	0.0016473
'GABRG2'	'04080: Neuroactive ligand-receptor interaction'	0.722572	7.04959	7.05395	0.00435238
'GABRG3'	'04080: Neuroactive ligand-receptor interaction'	1	7.04858	7.05041	0.00182946
'GABRQ'	'04080: Neuroactive ligand-receptor interaction'	0.674797	7.03517	7.03741	0.00224325
'GABRR1'	'04080: Neuroactive ligand-receptor interaction'	0.286844	7.11075	7.11225	0.00149486
'GABRR2'	'04080: Neuroactive ligand-receptor interaction'	0.0489799	7.03725	7.02948	-0.00776259
'GAD1'	'00251: Glutamate metabolism, 00252: Alanine and aspartate metabolism, 00410: beta-Alanine metabolism, 00430: Taurine and hypotaurine metabolism, 00650: Butanoate metabolism, 04940: Type I diabetes mellitus'	0.0184697	7.05191	7.03738	-0.0145218
'GAD2'	'00251: Glutamate metabolism, 00252: Alanine and aspartate metabolism, 00410: beta-Alanine metabolism, 00430: Taurine and hypotaurine metabolism, 00650: Butanoate metabolism, 04940: Type I diabetes mellitus'	0.317059	7.04423	7.04264	-0.00158767
'GADD45A'	'04010: MAPK signaling pathway, 04110: Cell cycle'	0.0420206	6.96833	6.97667	0.0083404
'GADD45B'	'04010: MAPK signaling pathway, 04110: Cell cycle'	0.771454	7.02366	7.02573	0.00206441
'GADD45G'	'04010: MAPK signaling pathway, 04110: Cell cycle'	0.771454	7.03697	7.03439	-0.00257964
'GAL'	'04080: Neuroactive ligand-receptor interaction'	0.000340309	7.03593	7.01623	-0.0197008
'GAL3ST1'	'00600: Sphingolipid metabolism'	0.0489799	7.0142	7.02637	0.0121695
'GALNS'	'00531: Glycosaminoglycan degradation, 01032: Glycan structures - degradation'	0.497916	7.02666	7.02985	0.0031925
'GALNT1'	'00512: O-Glycan biosynthesis, 01030: Glycan structures - biosynthesis 1'	0.00216862	6.91357	6.93245	0.0188725
'GALNT4'	'00512: O-Glycan biosynthesis, 01030: Glycan structures - biosynthesis 1'	0.674797	6.97646	6.98644	0.00998756
'GALNT5'	'00512: O-Glycan biosynthesis, 01030: Glycan structures - biosynthesis 1'	0.771454	6.98257	6.98442	0.0018441
'GALR1'	'04080: Neuroactive ligand-receptor interaction'	0.974253	7.03777	7.03951	0.00173944
'GALR2'	'04080: Neuroactive ligand-receptor interaction'	0.922866	7.04269	7.04307	0.000382144
'GANAB'	'00510: N-Glycan biosynthesis, 01030: Glycan structures - biosynthesis 1'	0.349288	6.93883	6.94606	0.00722646
'GAPDH'	'00010: Glycolysis / Gluconeogenesis, 01510: Neurodegenerative Disorders, 05010: Alzheimer''s disease, 05040: Huntington''s disease, 05050: Dentatorubropallidoluysian atrophy (DRPLA)'	0.113771	7.1754	7.18137	0.00596438
'GARS'	'00260: Glycine, serine and threonine metabolism, 00970: Aminoacyl-tRNA biosynthesis'	0.208132	6.91771	6.89946	-0.0182499
'GART'	'00230: Purine metabolism, 00670: One carbon pool by folate'	0.087161	7.01379	7.00885	-0.00493989
'GAS1'	'04340: Hedgehog signaling pathway'	0.0107811	7.04148	7.03683	-0.00464955
'GBA'	'00460: Cyanoamino acid metabolism, 00500: Starch and sucrose metabolism, 00600: Sphingolipid metabolism, 00940: Stilbene, coumarine and lignin biosynthesis, 01032: Glycan structures - degradation'	0.0420206	7.01156	7.02256	0.0110029
'GBE1'	'00500: Starch and sucrose metabolism'	0.497916	6.94152	6.94501	0.00349017
'GCG'	'04080: Neuroactive ligand-receptor interaction'	0.0219336	6.91644	6.95984	0.0433962
'GCGR'	'04080: Neuroactive ligand-receptor interaction'	0.258636	7.03035	7.03387	0.00352218
'GCK'	'00010: Glycolysis / Gluconeogenesis, 00052: Galactose metabolism, 00500: Starch and sucrose metabolism, 00521: Streptomycin biosynthesis, 04910: Insulin signaling pathway, 04930: Type II diabetes mellitus, 04950: Maturity onset diabetes of the young'	0.58323	7.05158	7.05055	-0.00102785
'GDF5'	'04060: Cytokine-cytokine receptor interaction, 04350: TGF-beta signaling pathway'	0.871799	7.03129	7.03494	0.00364959
'GFAP'	'01510: Neurodegenerative Disorders, 05060: Prion disease'	0.286844	7.10345	7.09948	-0.00396619
'GFPT1'	'00251: Glutamate metabolism, 00530: Aminosugars metabolism'	0.497916	7.01175	7.0111	-0.000645784
'GGH'	'00790: Folate biosynthesis'	0.974253	6.91866	6.91816	-0.000499928
'GH1'	'04060: Cytokine-cytokine receptor interaction, 04080: Neuroactive ligand-receptor interaction, 04630: Jak-STAT signaling pathway'	0.922866	7.04603	7.04678	0.000749441
'GHR'	'04060: Cytokine-cytokine receptor interaction, 04080: Neuroactive ligand-receptor interaction, 04630: Jak-STAT signaling pathway'	0.0658171	7.02353	7.03614	0.0126104
'GHRH'	'04080: Neuroactive ligand-receptor interaction'	1	7.02523	7.02698	0.00175527
'GHRHR'	'04080: Neuroactive ligand-receptor interaction'	0.0758785	7.04559	7.03997	-0.00562168
'GHRL'	'04080: Neuroactive ligand-receptor interaction'	0.129287	7.0318	7.03864	0.00684144
'GHSR'	'04080: Neuroactive ligand-receptor interaction'	0.0154943	7.04701	7.03803	-0.00898296
'GIP'	'04080: Neuroactive ligand-receptor interaction'	0.974253	7.03552	7.03552	-2.22126e-07
'GIPR'	'04080: Neuroactive ligand-receptor interaction'	0.722572	7.0365	7.03736	0.000858012
'GIT1'	'04810: Regulation of actin cytoskeleton, 05120: Epithelial cell signaling in Helicobacter pylori infection'	0.232412	7.0544	7.06205	0.00765444
'GJA1'	'01430: Cell Communication, 04540: Gap junction'	0.0129492	6.95486	6.93847	-0.016384
'GJA3'	'01430: Cell Communication'	0.771454	7.04415	7.04504	0.000888427
'GJA5'	'01430: Cell Communication'	0.0758785	7.04255	7.03201	-0.0105322
'GJA8'	'01430: Cell Communication'	0.628299	7.03936	7.04332	0.0039602
'GJB1'	'01430: Cell Communication'	0.0305861	6.9593	6.97155	0.012252
'GJB2'	'01430: Cell Communication'	0.0259496	6.92998	6.94198	0.012005
'GJB6'	'01430: Cell Communication'	0.258636	7.01771	7.01461	-0.0031007
'GJC1'	'01430: Cell Communication'	0.0305861	7.01192	7.02205	0.0101254
'GK'	'00561: Glycerolipid metabolism, 03320: PPAR signaling pathway'	0.056882	7.00579	6.99247	-0.0133205
'GLB1'	'00052: Galactose metabolism, 00511: N-Glycan degradation, 00531: Glycosaminoglycan degradation, 00561: Glycerolipid metabolism, 00600: Sphingolipid metabolism, 00604: Glycosphingolipid biosynthesis - ganglioseries, 01032: Glycan structures - degradation'	0.974253	6.98002	6.9806	0.000576627
'GLDC'	'00260: Glycine, serine and threonine metabolism'	0.317059	7.06919	7.07317	0.00397695
'GLG1'	'04514: Cell adhesion molecules (CAMs)'	0.771454	6.93488	6.93331	-0.00156645
'GLI1'	'04340: Hedgehog signaling pathway, 05217: Basal cell carcinoma'	0.008942	7.0146	7.03068	0.0160789
'GLI2'	'04340: Hedgehog signaling pathway, 05217: Basal cell carcinoma'	0.922866	7.04768	7.04904	0.00135395
'GLI3'	'04340: Hedgehog signaling pathway, 05217: Basal cell carcinoma'	0.286844	7.02879	7.03745	0.00866094
'GLP1R'	'04080: Neuroactive ligand-receptor interaction'	0.497916	7.03601	7.0387	0.00269307
'GLRA1'	'04080: Neuroactive ligand-receptor interaction'	0.871799	7.0408	7.03917	-0.0016283
'GLS'	'00251: Glutamate metabolism, 00471: D-Glutamine and D-glutamate metabolism, 00910: Nitrogen metabolism'	0.383524	7.00306	7.00034	-0.00272203
'GLS2'	'00251: Glutamate metabolism, 00471: D-Glutamine and D-glutamate metabolism, 00910: Nitrogen metabolism'	0.087161	7.02575	7.03529	0.00954105
'GLUD1'	'00251: Glutamate metabolism, 00330: Arginine and proline metabolism, 00471: D-Glutamine and D-glutamate metabolism, 00910: Nitrogen metabolism'	0.056882	7.04184	7.05127	0.00942831
'GLUL'	'00251: Glutamate metabolism, 00550: Peptidoglycan biosynthesis, 00910: Nitrogen metabolism'	0.00216862	6.94094	6.92348	-0.0174681
'GMPS'	'00230: Purine metabolism, 00251: Glutamate metabolism'	0.0154943	7.08842	7.07325	-0.0151709
'GNA11'	'04020: Calcium signaling pathway, 04540: Gap junction, 04730: Long-term depression, 04912: GnRH signaling pathway'	0.00608134	6.93107	6.95521	0.0241369
'GNA12'	'04010: MAPK signaling pathway, 04730: Long-term depression, 04810: Regulation of actin cytoskeleton'	0.232412	7.03914	7.04106	0.00191538
'GNA13'	'04730: Long-term depression, 04810: Regulation of actin cytoskeleton'	0.258636	7.02389	7.03032	0.00643043
'GNA14'	'04020: Calcium signaling pathway'	0.317059	7.14664	7.15268	0.00603685
'GNA15'	'04020: Calcium signaling pathway'	0.165192	7.02642	7.01959	-0.00682982
'GNAI1'	'04360: Axon guidance, 04530: Tight junction, 04540: Gap junction, 04670: Leukocyte transendothelial migration, 04730: Long-term depression, 04916: Melanogenesis'	0.129287	7.0789	7.08663	0.00773041
'GNAI2'	'04360: Axon guidance, 04530: Tight junction, 04540: Gap junction, 04670: Leukocyte transendothelial migration, 04730: Long-term depression, 04916: Melanogenesis'	0.497916	7.09409	7.09341	-0.000679141
'GNAI3'	'04360: Axon guidance, 04530: Tight junction, 04540: Gap junction, 04670: Leukocyte transendothelial migration, 04730: Long-term depression, 04916: Melanogenesis'	0.185746	7.0028	6.99877	-0.00402998
'GNAO1'	'04730: Long-term depression, 04916: Melanogenesis'	0.497916	7.06351	7.06766	0.00415264
'GNAQ'	'04020: Calcium signaling pathway, 04540: Gap junction, 04720: Long-term potentiation, 04730: Long-term depression, 04912: GnRH signaling pathway, 04916: Melanogenesis'	0.0489799	6.98684	6.99998	0.0131423
'GNAS'	'04020: Calcium signaling pathway, 04540: Gap junction, 04730: Long-term depression, 04742: Taste transduction, 04912: GnRH signaling pathway, 04916: Melanogenesis, 05110: Cholera - Infection'	0.258636	7.13254	7.13385	0.00130479
'GNAT3'	'04742: Taste transduction'	0.628299	7.0375	7.03842	0.000926197
'GNAZ'	'04730: Long-term depression'	0.628299	7.02361	7.02483	0.0012267
'GNB3'	'04742: Taste transduction'	1	7.14121	7.14029	-0.000921702
'GNG12'	'04010: MAPK signaling pathway, 04810: Regulation of actin cytoskeleton'	0.0259496	6.9554	6.97461	0.0192091
'GNG13'	'04742: Taste transduction'	0.00331391	7.01762	7.02805	0.0104293
'GNMT'	'00260: Glycine, serine and threonine metabolism'	0.821261	7.042	7.03957	-0.00243546
'GNPAT'	'00564: Glycerophospholipid metabolism'	0.087161	7.00295	7.01026	0.00730907
'GNRH1'	'04080: Neuroactive ligand-receptor interaction, 04912: GnRH signaling pathway'	0.165192	7.02782	7.03433	0.00651324
'GNRHR'	'04080: Neuroactive ligand-receptor interaction, 04912: GnRH signaling pathway'	0.722572	7.04011	7.0383	-0.00181051
'GNS'	'00531: Glycosaminoglycan degradation, 01032: Glycan structures - degradation'	0.0107811	6.94553	6.93213	-0.0133994
'GOSR1'	'04130: SNARE interactions in vesicular transport'	0.821261	6.97239	6.97449	0.0020911
'GOSR2'	'04130: SNARE interactions in vesicular transport'	0.349288	7.00187	7.0019	2.66782e-05
'GOT1'	'00251: Glutamate metabolism, 00252: Alanine and aspartate metabolism, 00272: Cysteine metabolism, 00330: Arginine and proline metabolism, 00350: Tyrosine metabolism, 00360: Phenylalanine metabolism, 00400: Phenylalanine, tyrosine and tryptophan biosynthesis, 00401: Novobiocin biosynthesis, 00710: Carbon fixation, 00950: Alkaloid biosynthesis I'	0.0259496	6.98494	7.00545	0.0205101
'GOT2'	'00251: Glutamate metabolism, 00252: Alanine and aspartate metabolism, 00272: Cysteine metabolism, 00330: Arginine and proline metabolism, 00350: Tyrosine metabolism, 00360: Phenylalanine metabolism, 00400: Phenylalanine, tyrosine and tryptophan biosynthesis, 00401: Novobiocin biosynthesis, 00710: Carbon fixation, 00950: Alkaloid biosynthesis I'	0.539729	6.91086	6.92203	0.0111685
'GP1BA'	'04512: ECM-receptor interaction, 04640: Hematopoietic cell lineage'	0.185746	7.01893	7.02502	0.00608615
'GP1BB'	'04512: ECM-receptor interaction, 04640: Hematopoietic cell lineage'	0.871799	7.05211	7.0557	0.0035906
'GP5'	'04512: ECM-receptor interaction, 04640: Hematopoietic cell lineage'	0.232412	7.0546	7.0505	-0.00409794
'GP6'	'04512: ECM-receptor interaction'	0.771454	7.03887	7.03844	-0.000430375
'GP9'	'04512: ECM-receptor interaction, 04640: Hematopoietic cell lineage'	0.974253	7.04788	7.04742	-0.000462814
'GPAA1'	'00563: Glycosylphosphatidylinositol(GPI)-anchor biosynthesis'	0.58323	6.94359	6.93974	-0.00385178
'GPAM'	'00561: Glycerolipid metabolism, 00564: Glycerophospholipid metabolism'	0.208132	7.01091	7.00362	-0.00729409
'GPD1'	'00564: Glycerophospholipid metabolism'	0.286844	7.04347	7.04273	-0.00074633
'GPD2'	'00564: Glycerophospholipid metabolism'	0.0420206	7.01416	7.01829	0.00413405
'GPI'	'00010: Glycolysis / Gluconeogenesis, 00030: Pentose phosphate pathway, 00500: Starch and sucrose metabolism'	0.165192	6.9736	6.9859	0.012305
'GPLD1'	'00563: Glycosylphosphatidylinositol(GPI)-anchor biosynthesis'	0.674797	7.04436	7.04384	-0.000524995
'GPR37'	'05020: Parkinson''s disease'	0.0305861	7.04431	7.0366	-0.00771376
'GPR50'	'04080: Neuroactive ligand-receptor interaction'	0.258636	7.0464	7.04323	-0.00317123
'GPR63'	'04080: Neuroactive ligand-receptor interaction'	0.0489799	7.02326	7.02961	0.00635027
'GPT'	'00251: Glutamate metabolism, 00252: Alanine and aspartate metabolism, 00710: Carbon fixation'	0.0184697	6.97796	6.9908	0.0128427
'GPX1'	'00480: Glutathione metabolism, 00590: Arachidonic acid metabolism, 05030: Amyotrophic lateral sclerosis (ALS)'	0.871799	6.87549	6.87643	0.000937512
'GRAP2'	'04660: T cell receptor signaling pathway'	0.821261	7.12089	7.12284	0.00195293
'GRIA1'	'04080: Neuroactive ligand-receptor interaction, 04720: Long-term potentiation, 04730: Long-term depression'	0.821261	7.05813	7.05756	-0.000574288
'GRIA2'	'04080: Neuroactive ligand-receptor interaction, 04720: Long-term potentiation, 04730: Long-term depression'	0.871799	7.04725	7.04586	-0.00139204
'GRIA3'	'04080: Neuroactive ligand-receptor interaction, 04730: Long-term depression'	0.539729	7.04427	7.04536	0.00108524
'GRIA4'	'04080: Neuroactive ligand-receptor interaction'	0.087161	7.05392	7.04971	-0.00421518
'GRID2'	'04080: Neuroactive ligand-receptor interaction, 04730: Long-term depression'	0.0997601	7.04745	7.03823	-0.00921864
'GRIK1'	'04080: Neuroactive ligand-receptor interaction'	0.539729	7.0419	7.03898	-0.00291975
'GRIK2'	'04080: Neuroactive ligand-receptor interaction'	0.185746	7.04853	7.04653	-0.0020061
'GRIK3'	'04080: Neuroactive ligand-receptor interaction'	0.771454	7.03409	7.03533	0.00123346
'GRIK5'	'04080: Neuroactive ligand-receptor interaction'	0.165192	7.04286	7.03969	-0.00317042
'GRIN1'	'04020: Calcium signaling pathway, 04080: Neuroactive ligand-receptor interaction, 04720: Long-term potentiation'	0.922866	7.07063	7.06865	-0.00198515
'GRIN2A'	'04020: Calcium signaling pathway, 04080: Neuroactive ligand-receptor interaction, 04720: Long-term potentiation'	0.0758785	7.03377	7.04845	0.0146811
'GRIN2B'	'04080: Neuroactive ligand-receptor interaction, 04720: Long-term potentiation'	0.497916	7.05384	7.05777	0.00392757
'GRIN2D'	'04020: Calcium signaling pathway, 04080: Neuroactive ligand-receptor interaction, 04720: Long-term potentiation'	0.0184697	7.04807	7.03722	-0.0108465
'GRIN3A'	'04080: Neuroactive ligand-receptor interaction'	0.497916	7.04316	7.04188	-0.00127605
'GRIN3B'	'04080: Neuroactive ligand-receptor interaction'	0.232412	7.04113	7.03766	-0.00346629
'GRM1'	'04020: Calcium signaling pathway, 04080: Neuroactive ligand-receptor interaction, 04540: Gap junction, 04720: Long-term potentiation, 04730: Long-term depression'	0.497916	7.04921	7.05038	0.00117286
'GRM2'	'04080: Neuroactive ligand-receptor interaction'	0.821261	7.04086	7.04128	0.000423592
'GRM3'	'04080: Neuroactive ligand-receptor interaction'	0.539729	7.0387	7.03787	-0.000834777
'GRM4'	'04080: Neuroactive ligand-receptor interaction, 04742: Taste transduction'	0.974253	7.02127	7.02098	-0.000294716
'GRM5'	'04020: Calcium signaling pathway, 04080: Neuroactive ligand-receptor interaction, 04540: Gap junction, 04720: Long-term potentiation, 04730: Long-term depression'	0.539729	7.0489	7.04857	-0.000332789
'GRM6'	'04080: Neuroactive ligand-receptor interaction'	1	7.02471	7.02362	-0.00108153
'GRM7'	'04080: Neuroactive ligand-receptor interaction'	0.419741	7.04371	7.04574	0.00203115
'GRM8'	'04080: Neuroactive ligand-receptor interaction'	0.771454	7.03605	7.03717	0.0011281
'GRP'	'04080: Neuroactive ligand-receptor interaction'	0.113771	7.04701	7.03826	-0.00874406
'GRPR'	'04020: Calcium signaling pathway, 04080: Neuroactive ligand-receptor interaction'	0.113771	7.00459	7.01106	0.00646838
'GSK3B'	'04110: Cell cycle, 04310: Wnt signaling pathway, 04340: Hedgehog signaling pathway, 04360: Axon guidance, 04510: Focal adhesion, 04662: B cell receptor signaling pathway, 04910: Insulin signaling pathway, 04916: Melanogenesis, 05010: Alzheimer''s disease, 05210: Colorectal cancer, 05217: Basal cell carcinoma'	0.922866	7.09814	7.09838	0.000248259
'GSN'	'04810: Regulation of actin cytoskeleton'	0.974253	7.04935	7.04772	-0.00163609
'GSR'	'00251: Glutamate metabolism, 00480: Glutathione metabolism'	0.317059	6.93906	6.9465	0.00744013
'GSS'	'00251: Glutamate metabolism, 00480: Glutathione metabolism'	0.457892	6.9212	6.92418	0.00298036
'GSTK1'	'00480: Glutathione metabolism, 00980: Metabolism of xenobiotics by cytochrome P450'	0.0997601	7.01249	7.01826	0.00576726
'GSTM1'	'00480: Glutathione metabolism, 00980: Metabolism of xenobiotics by cytochrome P450'	0.0259496	7.02621	7.04663	0.020423
'GSTM2'	'00480: Glutathione metabolism, 00980: Metabolism of xenobiotics by cytochrome P450'	0.0129492	6.9288	6.95248	0.0236805
'GSTM3'	'00480: Glutathione metabolism, 00980: Metabolism of xenobiotics by cytochrome P450'	0.58323	6.98828	6.98681	-0.0014632
'GSTM4'	'00480: Glutathione metabolism, 00980: Metabolism of xenobiotics by cytochrome P450'	0.00407286	6.97242	6.99137	0.0189431
'GSTO1'	'00480: Glutathione metabolism, 00980: Metabolism of xenobiotics by cytochrome P450'	0.821261	6.90087	6.88747	-0.0134002
'GSTP1'	'00480: Glutathione metabolism, 00980: Metabolism of xenobiotics by cytochrome P450'	0.722572	6.89151	6.8923	0.000791054
'GSTZ1'	'00350: Tyrosine metabolism, 00480: Glutathione metabolism, 00643: Styrene degradation, 00980: Metabolism of xenobiotics by cytochrome P450'	0.185746	6.99821	6.99911	0.00089673
'GTF2A1'	'03022: Basal transcription factors'	0.383524	7.04621	7.04265	-0.00355441
'GTF2A2'	'03022: Basal transcription factors'	0.00111506	6.98343	7.00383	0.0203948
'GTF2B'	'03022: Basal transcription factors'	0.974253	6.99832	6.9999	0.00158077
'GTF2E1'	'03022: Basal transcription factors'	0.922866	7.01891	7.0176	-0.00130098
'GTF2E2'	'03022: Basal transcription factors'	0.113771	7.00868	7.00607	-0.00261226
'GTF2F1'	'03022: Basal transcription factors'	0.871799	7.00966	7.01286	0.00319777
'GTF2F2'	'03022: Basal transcription factors'	0.0219336	7.03836	7.02498	-0.0133802
'GTF2H1'	'03022: Basal transcription factors'	0.871799	7.03484	7.03603	0.0011858
'GTF2H2'	'03022: Basal transcription factors'	0.129287	7.0244	7.0323	0.00790724
'GTF2H3'	'03022: Basal transcription factors'	0.146399	6.99647	7.00428	0.00781738
'GTF2H4'	'03022: Basal transcription factors'	0.286844	7.04533	7.04534	9.44979e-06
'GTF2I'	'03022: Basal transcription factors'	0.0658171	7.18984	7.19492	0.00507826
'GTF2IRD1'	'03022: Basal transcription factors'	0.00268598	7.03396	7.02791	-0.00605132
'GUCA1A'	'04740: Olfactory transduction'	0.539729	7.03992	7.0387	-0.00122082
'GUCA1B'	'04740: Olfactory transduction'	0.0420206	7.02079	7.0271	0.00630899
'GUCY1A2'	'00230: Purine metabolism, 04540: Gap junction, 04730: Long-term depression'	0.539729	7.04018	7.03649	-0.00369023
'GUCY1A3'	'00230: Purine metabolism, 04540: Gap junction, 04730: Long-term depression'	0.000886374	7.02216	7.0011	-0.0210633
'GUCY1B3'	'00230: Purine metabolism, 04540: Gap junction, 04730: Long-term depression'	0.000701837	7.0167	6.99655	-0.0201505
'GUCY2C'	'00230: Purine metabolism, 04540: Gap junction, 04730: Long-term depression'	0.208132	6.93039	6.94423	0.0138366
'GUCY2D'	'00230: Purine metabolism, 04540: Gap junction, 04730: Long-term depression'	0.349288	7.04609	7.0446	-0.00149167
'GUCY2F'	'00230: Purine metabolism, 04540: Gap junction, 04730: Long-term depression'	0.0758785	7.04624	7.04265	-0.00359515
'GUK1'	'00230: Purine metabolism'	0.871799	7.04936	7.04765	-0.00171279
'GUSB'	'00040: Pentose and glucuronate interconversions, 00500: Starch and sucrose metabolism, 00531: Glycosaminoglycan degradation, 00860: Porphyrin and chlorophyll metabolism, 01032: Glycan structures - degradation'	0.165192	7.00832	7.01786	0.00954055
'GYS1'	'00500: Starch and sucrose metabolism, 04910: Insulin signaling pathway'	0.497916	6.95893	6.96191	0.00298268
'GZMA'	'04080: Neuroactive ligand-receptor interaction'	0.165192	6.98813	6.99994	0.0118102
'GZMB'	'04650: Natural killer cell mediated cytotoxicity, 04940: Type I diabetes mellitus'	0.00174413	7.04567	7.01295	-0.0327198
'Gnb1'	'04742: Taste transduction'	0.0184697	7.0082	7.01575	0.00754221
'Grb2'	'01510: Neurodegenerative Disorders, 04010: MAPK signaling pathway, 04320: Dorso-ventral axis formation, 04510: Focal adhesion, 04540: Gap junction, 04630: Jak-STAT signaling pathway, 04650: Natural killer cell mediated cytotoxicity, 04660: T cell receptor signaling pathway, 04664: Fc epsilon RI signaling pathway, 04910: Insulin signaling pathway, 04912: GnRH signaling pathway, 05040: Huntington'…	0.821261	6.97788	6.97757	-0.000308442
'HAAO'	'00380: Tryptophan metabolism'	0.349288	7.00725	7.02002	0.0127658
'HADH'	'00062: Fatty acid elongation in mitochondria, 00071: Fatty acid metabolism, 00280: Valine, leucine and isoleucine degradation, 00310: Lysine degradation, 00380: Tryptophan metabolism, 00650: Butanoate metabolism, 00930: Caprolactam degradation'	0.0219336	6.91232	6.93138	0.0190638
'HADHA'	'00062: Fatty acid elongation in mitochondria, 00071: Fatty acid metabolism, 00280: Valine, leucine and isoleucine degradation, 00310: Lysine degradation, 00380: Tryptophan metabolism, 00410: beta-Alanine metabolism, 00632: Benzoate degradation via CoA ligation, 00640: Propanoate metabolism, 00650: Butanoate metabolism, 00903: Limonene and pinene degradation, 00930: Caprolactam degradation'	0.087161	7.18139	7.19018	0.00879324
'HADHB'	'00062: Fatty acid elongation in mitochondria, 00071: Fatty acid metabolism, 00120: Bile acid biosynthesis, 00280: Valine, leucine and isoleucine degradation, 00362: Benzoate degradation via hydroxylation'	0.00498637	7.1086	7.11761	0.00901364
'HAP1'	'05040: Huntington''s disease'	0.628299	7.05501	7.05171	-0.00330758
'HARS'	'00340: Histidine metabolism, 00970: Aminoacyl-tRNA biosynthesis'	0.58323	6.97116	6.97044	-0.00072298
'HARS2'	'00340: Histidine metabolism, 00970: Aminoacyl-tRNA biosynthesis'	0.0489799	7.01609	7.02246	0.00637045
'HBEGF'	'04912: GnRH signaling pathway, 05120: Epithelial cell signaling in Helicobacter pylori infection'	0.628299	7.03684	7.03422	-0.00262027
'HCLS1'	'04530: Tight junction, 05130: Pathogenic Escherichia coli infection - EHEC, 05131: Pathogenic Escherichia coli infection - EPEC'	0.383524	6.95783	6.9454	-0.0124301
'HCRT'	'04080: Neuroactive ligand-receptor interaction'	0.974253	7.03755	7.03841	0.000862722
'HCRTR1'	'04080: Neuroactive ligand-receptor interaction'	0.0129492	7.04617	7.03164	-0.0145274
'HCRTR2'	'04080: Neuroactive ligand-receptor interaction'	0.628299	7.03783	7.03655	-0.00127816
'HCST'	'04650: Natural killer cell mediated cytotoxicity'	0.0489799	6.99823	7.00973	0.0115082
'HDAC1'	'04110: Cell cycle, 04330: Notch signaling pathway, 05220: Chronic myeloid leukemia'	0.185746	7.14327	7.14793	0.00465407
'HDAC2'	'04110: Cell cycle, 04330: Notch signaling pathway, 05220: Chronic myeloid leukemia'	0.821261	7.17398	7.17455	0.000576458
'HERC1'	'04120: Ubiquitin mediated proteolysis'	0.349288	7.03702	7.04027	0.00325277
'HERC2'	'04120: Ubiquitin mediated proteolysis'	0.974253	7.03539	7.03108	-0.00431551
'HES1'	'04330: Notch signaling pathway, 04950: Maturity onset diabetes of the young'	0.208132	6.98053	6.99555	0.0150192
'HES5'	'04330: Notch signaling pathway'	0.0758785	7.02248	7.03018	0.00770473
'HEXA'	'00511: N-Glycan degradation, 00530: Aminosugars metabolism, 00531: Glycosaminoglycan degradation, 00603: Glycosphingolipid biosynthesis - globoseries, 00604: Glycosphingolipid biosynthesis - ganglioseries, 01032: Glycan structures - degradation'	0.722572	7.03548	7.03557	9.18889e-05
'HGD'	'00350: Tyrosine metabolism, 00643: Styrene degradation'	0.821261	6.99948	6.99575	-0.00372392
'HGF'	'04060: Cytokine-cytokine receptor interaction, 04510: Focal adhesion, 05218: Melanoma'	0.0997601	7.07036	7.0666	-0.00375568
'HHEX'	'04950: Maturity onset diabetes of the young'	0.113771	7.01831	7.00759	-0.0107123
'HHIP'	'04340: Hedgehog signaling pathway, 05217: Basal cell carcinoma'	0.974253	7.03838	7.03849	0.000105241
'HIF1A'	'04150: mTOR signaling pathway'	0.674797	7.03809	7.04031	0.00221788
'HIP1'	'05040: Huntington''s disease'	0.00174413	7.03913	7.0223	-0.0168327
'HK1'	'00010: Glycolysis / Gluconeogenesis, 00051: Fructose and mannose metabolism, 00052: Galactose metabolism, 00500: Starch and sucrose metabolism, 00521: Streptomycin biosynthesis, 00530: Aminosugars metabolism'	0.00407286	7.08347	7.07167	-0.0118054
'HK2'	'00010: Glycolysis / Gluconeogenesis, 00051: Fructose and mannose metabolism, 00052: Galactose metabolism, 00500: Starch and sucrose metabolism, 00521: Streptomycin biosynthesis, 00530: Aminosugars metabolism'	0.286844	6.99773	6.98655	-0.0111842
'HK3'	'00010: Glycolysis / Gluconeogenesis, 00051: Fructose and mannose metabolism, 00052: Galactose metabolism, 00500: Starch and sucrose metabolism, 00521: Streptomycin biosynthesis, 00530: Aminosugars metabolism'	0.146399	7.04606	7.04269	-0.00336927
'HLA-A'	'04514: Cell adhesion molecules (CAMs), 04612: Antigen processing and presentation, 04650: Natural killer cell mediated cytotoxicity, 04940: Type I diabetes mellitus'	0.0758785	7.0863	7.09347	0.00716903
'HLA-B'	'04514: Cell adhesion molecules (CAMs), 04612: Antigen processing and presentation, 04650: Natural killer cell mediated cytotoxicity, 04940: Type I diabetes mellitus'	0.113771	6.94733	6.96134	0.0140101
'HLA-C'	'04514: Cell adhesion molecules (CAMs), 04612: Antigen processing and presentation, 04650: Natural killer cell mediated cytotoxicity, 04940: Type I diabetes mellitus'	0.0154943	6.84526	6.86309	0.017826
'HLA-DMA'	'04514: Cell adhesion molecules (CAMs), 04612: Antigen processing and presentation, 04940: Type I diabetes mellitus'	0.539729	6.92475	6.92904	0.00429464
'HLA-DMB'	'04514: Cell adhesion molecules (CAMs), 04612: Antigen processing and presentation, 04940: Type I diabetes mellitus'	0.056882	6.92365	6.93912	0.0154671
'HLA-DOB'	'04514: Cell adhesion molecules (CAMs), 04612: Antigen processing and presentation, 04940: Type I diabetes mellitus'	0.871799	7.02445	7.02251	-0.00194142
'HLA-DPA1'	'04514: Cell adhesion molecules (CAMs), 04612: Antigen processing and presentation, 04940: Type I diabetes mellitus'	0.00738835	6.87728	6.89213	0.0148497
'HLA-DPB1'	'04514: Cell adhesion molecules (CAMs), 04612: Antigen processing and presentation, 04940: Type I diabetes mellitus'	0.771454	7.01694	7.01862	0.00168285
'HLA-DQA1'	'04514: Cell adhesion molecules (CAMs), 04612: Antigen processing and presentation, 04940: Type I diabetes mellitus'	0.129287	6.95111	6.98297	0.0318663
'HLA-DQB1'	'04514: Cell adhesion molecules (CAMs), 04612: Antigen processing and presentation, 04940: Type I diabetes mellitus'	0.00738835	6.92905	6.96263	0.0335723
'HLA-DRA'	'04514: Cell adhesion molecules (CAMs), 04612: Antigen processing and presentation, 04640: Hematopoietic cell lineage, 04940: Type I diabetes mellitus'	0.0997601	6.89438	6.90227	0.00789342
'HLA-DRB1'	'04514: Cell adhesion molecules (CAMs), 04612: Antigen processing and presentation, 04640: Hematopoietic cell lineage, 04940: Type I diabetes mellitus'	0.497916	6.95112	6.95695	0.00582028
'HLA-DRB5'	'04514: Cell adhesion molecules (CAMs), 04612: Antigen processing and presentation, 04640: Hematopoietic cell lineage, 04940: Type I diabetes mellitus'	0.00407286	6.84054	6.86124	0.0207
'HLA-E'	'04514: Cell adhesion molecules (CAMs), 04612: Antigen processing and presentation, 04650: Natural killer cell mediated cytotoxicity, 04940: Type I diabetes mellitus'	0.974253	7.02525	7.0247	-0.000547693
'HLA-F'	'04514: Cell adhesion molecules (CAMs), 04612: Antigen processing and presentation, 04940: Type I diabetes mellitus'	0.208132	6.85115	6.86172	0.0105676
'HLA-G'	'04514: Cell adhesion molecules (CAMs), 04612: Antigen processing and presentation, 04650: Natural killer cell mediated cytotoxicity, 04940: Type I diabetes mellitus'	0.457892	6.8501	6.85751	0.00740515
'HLCS'	'00780: Biotin metabolism'	0.0420206	7.0433	7.03589	-0.00741064
'HMGCR'	'00100: Biosynthesis of steroids'	0.208132	6.92033	6.93376	0.0134254
'HMGCS1'	'00072: Synthesis and degradation of ketone bodies, 00280: Valine, leucine and isoleucine degradation, 00650: Butanoate metabolism'	0.871799	6.98052	6.98085	0.00033475
'HMGCS2'	'00072: Synthesis and degradation of ketone bodies, 00280: Valine, leucine and isoleucine degradation, 00650: Butanoate metabolism, 03320: PPAR signaling pathway'	0.00268598	6.86905	6.93904	0.0699901
'HMMR'	'04512: ECM-receptor interaction'	0.0420206	7.03016	7.02172	-0.00844304
'HMOX1'	'00860: Porphyrin and chlorophyll metabolism'	0.0658171	6.9475	6.96624	0.0187407
'HMOX2'	'00860: Porphyrin and chlorophyll metabolism'	0.539729	6.97662	6.98129	0.00467034
'HNF4A'	'04950: Maturity onset diabetes of the young'	0.0259496	7.05754	7.05277	-0.00476775
'HNF4G'	'04950: Maturity onset diabetes of the young'	0.129287	6.98613	7.00085	0.01472
'HRAS'	'04010: MAPK signaling pathway, 04360: Axon guidance, 04370: VEGF signaling pathway, 04510: Focal adhesion, 04530: Tight junction, 04540: Gap junction, 04650: Natural killer cell mediated cytotoxicity, 04660: T cell receptor signaling pathway, 04662: B cell receptor signaling pathway, 04664: Fc epsilon RI signaling pathway, 04720: Long-term potentiation, 04730: Long-term depression, 04810: Regula…	0.628299	7.05137	7.05473	0.00336646
'HRH3'	'04080: Neuroactive ligand-receptor interaction'	0.457892	7.02782	7.03262	0.00480134
'HRH4'	'04080: Neuroactive ligand-receptor interaction'	0.497916	7.04235	7.0392	-0.00314841
'HSD11B1'	'00140: C21-Steroid hormone metabolism, 00150: Androgen and estrogen metabolism'	0.035917	7.03192	7.02584	-0.00608891
'HSD11B2'	'00140: C21-Steroid hormone metabolism, 00150: Androgen and estrogen metabolism'	0.00268598	6.84678	6.91254	0.0657553
'HSD17B10'	'00062: Fatty acid elongation in mitochondria, 00071: Fatty acid metabolism, 00280: Valine, leucine and isoleucine degradation, 00310: Lysine degradation, 00380: Tryptophan metabolism, 00650: Butanoate metabolism, 00930: Caprolactam degradation, 05010: Alzheimer''s disease'	0.383524	6.98905	6.97925	-0.00979677
'HSD17B4'	'00062: Fatty acid elongation in mitochondria, 00071: Fatty acid metabolism, 00280: Valine, leucine and isoleucine degradation, 00310: Lysine degradation, 00380: Tryptophan metabolism, 00650: Butanoate metabolism, 00930: Caprolactam degradation'	0.539729	7.15278	7.15601	0.00322981
'HSP90AA1'	'04612: Antigen processing and presentation'	0.258636	7.23218	7.23467	0.00249413
'HSP90AB1'	'04612: Antigen processing and presentation'	0.349288	7.15889	7.15143	-0.00746227
'HSPA5'	'01510: Neurodegenerative Disorders, 04612: Antigen processing and presentation, 05060: Prion disease'	0.771454	7.2096	7.20869	-0.000911769
'HSPD1'	'04940: Type I diabetes mellitus, 05060: Prion disease'	0.165192	7.22752	7.21526	-0.0122647
'HSPG2'	'04512: ECM-receptor interaction'	0.00216862	7.02169	6.99963	-0.022051
'HTR1A'	'04080: Neuroactive ligand-receptor interaction'	0.349288	7.03902	7.04319	0.00416197
'HTR1B'	'04080: Neuroactive ligand-receptor interaction'	0.821261	7.03189	7.03443	0.00254653
'HTR1D'	'04080: Neuroactive ligand-receptor interaction'	0.165192	7.04505	7.03688	-0.00817557
'HTR1E'	'04080: Neuroactive ligand-receptor interaction'	1	7.02833	7.0298	0.00147011
'HTR1F'	'04080: Neuroactive ligand-receptor interaction'	0.0658171	7.02234	7.02959	0.00725137
'HTR2A'	'04020: Calcium signaling pathway, 04080: Neuroactive ligand-receptor interaction, 04540: Gap junction'	0.628299	7.04672	7.04603	-0.000697458
'HTR2B'	'04020: Calcium signaling pathway, 04080: Neuroactive ligand-receptor interaction, 04540: Gap junction'	0.974253	7.03026	7.03181	0.00155324
'HTR2C'	'04020: Calcium signaling pathway, 04080: Neuroactive ligand-receptor interaction, 04540: Gap junction'	0.008942	7.04878	7.03677	-0.0120059
'HTR4'	'04020: Calcium signaling pathway, 04080: Neuroactive ligand-receptor interaction'	0.0420206	7.02268	7.03186	0.00917398
'HTR6'	'04020: Calcium signaling pathway, 04080: Neuroactive ligand-receptor interaction'	0.974253	7.03296	7.03168	-0.00127779
'IAPP'	'04950: Maturity onset diabetes of the young'	0.317059	7.03301	7.03574	0.00272835
'IARS'	'00290: Valine, leucine and isoleucine biosynthesis, 00970: Aminoacyl-tRNA biosynthesis'	0.539729	7.02928	7.03183	0.00255294
'IBSP'	'01430: Cell Communication, 04510: Focal adhesion, 04512: ECM-receptor interaction'	0.497916	7.03397	7.03794	0.00396834
'ICA1'	'04940: Type I diabetes mellitus'	0.922866	7.00205	7.00251	0.000461512
'ICAM1'	'04514: Cell adhesion molecules (CAMs), 04650: Natural killer cell mediated cytotoxicity, 04670: Leukocyte transendothelial migration'	0.00738835	7.01753	6.98508	-0.0324554
'ICAM2'	'04514: Cell adhesion molecules (CAMs), 04650: Natural killer cell mediated cytotoxicity'	0.165192	7.00487	6.99159	-0.0132795
'ICAM3'	'04514: Cell adhesion molecules (CAMs)'	0.497916	7.03047	7.03367	0.00319736
'ID1'	'04350: TGF-beta signaling pathway'	0.113771	6.87827	6.89111	0.0128424
'ID2'	'04350: TGF-beta signaling pathway'	0.0420206	6.99717	7.01264	0.0154621
'ID3'	'04350: TGF-beta signaling pathway'	0.0658171	6.9163	6.94383	0.0275354
'ID4'	'04350: TGF-beta signaling pathway'	0.208132	7.02023	7.02645	0.00622284
'IDE'	'05010: Alzheimer''s disease'	0.00738835	6.9759	6.96385	-0.0120478
'IDH2'	'00020: Citrate cycle (TCA cycle), 00480: Glutathione metabolism, 00720: Reductive carboxylate cycle (CO2 fixation)'	0.383524	6.94898	6.93475	-0.0142283
'IDH3A'	'00020: Citrate cycle (TCA cycle)'	0.0107811	7.00431	7.0194	0.0150955
'IDH3B'	'00020: Citrate cycle (TCA cycle)'	0.165192	6.91809	6.92766	0.00957312
'IDH3G'	'00020: Citrate cycle (TCA cycle)'	0.922866	6.95619	6.9592	0.00300879
'IFI30'	'04612: Antigen processing and presentation'	0.771454	6.89341	6.89225	-0.0011603
'IFITM1'	'04662: B cell receptor signaling pathway'	0.0758785	6.89414	6.87982	-0.0143245
'IFNA1'	'04060: Cytokine-cytokine receptor interaction, 04140: Regulation of autophagy, 04612: Antigen processing and presentation, 04620: Toll-like receptor signaling pathway, 04630: Jak-STAT signaling pathway, 04650: Natural killer cell mediated cytotoxicity'	0.419741	7.04607	7.04138	-0.0046856
'IFNA2'	'04060: Cytokine-cytokine receptor interaction, 04140: Regulation of autophagy, 04612: Antigen processing and presentation, 04620: Toll-like receptor signaling pathway, 04630: Jak-STAT signaling pathway, 04650: Natural killer cell mediated cytotoxicity'	0.208132	7.04121	7.02929	-0.0119177
'IFNAR1'	'04060: Cytokine-cytokine receptor interaction, 04620: Toll-like receptor signaling pathway, 04630: Jak-STAT signaling pathway, 04650: Natural killer cell mediated cytotoxicity'	0.771454	7.02422	7.02385	-0.000375069
'IFNAR2'	'04060: Cytokine-cytokine receptor interaction, 04620: Toll-like receptor signaling pathway, 04630: Jak-STAT signaling pathway, 04650: Natural killer cell mediated cytotoxicity'	0.821261	7.01266	7.01043	-0.00223525
'IFNB1'	'04060: Cytokine-cytokine receptor interaction, 04620: Toll-like receptor signaling pathway, 04630: Jak-STAT signaling pathway, 04650: Natural killer cell mediated cytotoxicity'	0.165192	7.04685	7.04551	-0.00133994
'IFNG'	'04060: Cytokine-cytokine receptor interaction, 04140: Regulation of autophagy, 04350: TGF-beta signaling pathway, 04630: Jak-STAT signaling pathway, 04650: Natural killer cell mediated cytotoxicity, 04660: T cell receptor signaling pathway, 04940: Type I diabetes mellitus'	0.317059	7.08054	7.0767	-0.00383479
'IFNGR1'	'04060: Cytokine-cytokine receptor interaction, 04630: Jak-STAT signaling pathway, 04650: Natural killer cell mediated cytotoxicity'	0.317059	6.91768	6.92471	0.00702799
'IFNGR2'	'04060: Cytokine-cytokine receptor interaction, 04630: Jak-STAT signaling pathway, 04650: Natural killer cell mediated cytotoxicity'	0.008942	6.87526	6.89463	0.0193645
'IFNW1'	'04060: Cytokine-cytokine receptor interaction, 04630: Jak-STAT signaling pathway'	0.165192	7.04642	7.04106	-0.00536277
'IFT57'	'05040: Huntington''s disease'	0.087161	6.9981	7.00249	0.00439102
'IGF1'	'04150: mTOR signaling pathway, 04510: Focal adhesion, 04730: Long-term depression, 05214: Glioma, 05218: Melanoma'	0.113771	7.0216	7.03276	0.0111621
'IGF1R'	'04510: Focal adhesion, 04520: Adherens junction, 04730: Long-term depression, 05210: Colorectal cancer, 05214: Glioma, 05218: Melanoma'	0.539729	7.08546	7.08601	0.000545208
'IHH'	'04340: Hedgehog signaling pathway'	0.00268598	6.95616	6.98507	0.0289104
'IKBKB'	'04010: MAPK signaling pathway, 04210: Apoptosis, 04620: Toll-like receptor signaling pathway, 04660: T cell receptor signaling pathway, 04662: B cell receptor signaling pathway, 04910: Insulin signaling pathway, 04920: Adipocytokine signaling pathway, 04930: Type II diabetes mellitus, 05120: Epithelial cell signaling in Helicobacter pylori infection, 05212: Pancreatic cancer, 05220: Chronic myel…	0.208132	7.099	7.09339	-0.00560089
'IKBKE'	'04620: Toll-like receptor signaling pathway'	0.58323	7.03535	7.03614	0.000791826
'IKBKG'	'04010: MAPK signaling pathway, 04210: Apoptosis, 04620: Toll-like receptor signaling pathway, 04660: T cell receptor signaling pathway, 04662: B cell receptor signaling pathway, 04920: Adipocytokine signaling pathway, 05120: Epithelial cell signaling in Helicobacter pylori infection, 05212: Pancreatic cancer, 05220: Chronic myeloid leukemia'	0.419741	7.09726	7.10166	0.00440085
'IL10'	'04060: Cytokine-cytokine receptor interaction, 04630: Jak-STAT signaling pathway, 04660: T cell receptor signaling pathway'	0.674797	7.04145	7.03954	-0.00190252
'IL10RA'	'04060: Cytokine-cytokine receptor interaction, 04630: Jak-STAT signaling pathway'	0.087161	6.97419	6.98114	0.00695072
'IL10RB'	'04060: Cytokine-cytokine receptor interaction, 04630: Jak-STAT signaling pathway'	0.821261	7.03027	7.02847	-0.00179873
'IL11RA'	'04060: Cytokine-cytokine receptor interaction, 04630: Jak-STAT signaling pathway, 04640: Hematopoietic cell lineage'	0.00407286	6.99852	7.01007	0.0115562
'IL12A'	'04060: Cytokine-cytokine receptor interaction, 04620: Toll-like receptor signaling pathway, 04630: Jak-STAT signaling pathway, 04940: Type I diabetes mellitus'	0.722572	7.06776	7.06754	-0.000218124
'IL12B'	'04060: Cytokine-cytokine receptor interaction, 04620: Toll-like receptor signaling pathway, 04630: Jak-STAT signaling pathway, 04940: Type I diabetes mellitus'	0.674797	7.0858	7.08609	0.000286771
'IL12RB1'	'04060: Cytokine-cytokine receptor interaction, 04630: Jak-STAT signaling pathway'	0.286844	7.0663	7.06975	0.00345236
'IL12RB2'	'04060: Cytokine-cytokine receptor interaction, 04630: Jak-STAT signaling pathway'	0.771454	7.06861	7.07315	0.00453857
'IL13'	'04060: Cytokine-cytokine receptor interaction, 04630: Jak-STAT signaling pathway, 04664: Fc epsilon RI signaling pathway'	0.146399	7.03064	7.03672	0.00607373
'IL13RA1'	'04060: Cytokine-cytokine receptor interaction, 04630: Jak-STAT signaling pathway'	0.286844	6.96116	6.95859	-0.00256952
'IL13RA2'	'04630: Jak-STAT signaling pathway'	0.00111506	7.05174	7.03027	-0.0214686
'IL15'	'04060: Cytokine-cytokine receptor interaction, 04630: Jak-STAT signaling pathway'	0.185746	7.01304	7.01847	0.00543429
'IL15RA'	'04060: Cytokine-cytokine receptor interaction, 04630: Jak-STAT signaling pathway'	0.0154943	6.98751	6.9788	-0.00871188
'IL17A'	'04060: Cytokine-cytokine receptor interaction'	0.0219336	7.05259	7.04295	-0.00964153
'IL17B'	'04060: Cytokine-cytokine receptor interaction'	0.628299	7.03529	7.03849	0.00319818
'IL17RA'	'04060: Cytokine-cytokine receptor interaction'	0.539729	7.01974	7.02023	0.00049393
'IL17RB'	'04060: Cytokine-cytokine receptor interaction'	0.258636	6.96868	6.97852	0.00983201
'IL18'	'04060: Cytokine-cytokine receptor interaction'	0.457892	6.97671	6.97732	0.000614914
'IL18R1'	'04060: Cytokine-cytokine receptor interaction'	0.0107811	7.04957	7.03854	-0.0110279
'IL18RAP'	'04060: Cytokine-cytokine receptor interaction'	0.974253	7.03248	7.03293	0.00044163
'IL19'	'04060: Cytokine-cytokine receptor interaction, 04630: Jak-STAT signaling pathway'	0.58323	7.04537	7.04369	-0.00168399
'IL1A'	'04010: MAPK signaling pathway, 04060: Cytokine-cytokine receptor interaction, 04210: Apoptosis, 04640: Hematopoietic cell lineage, 04940: Type I diabetes mellitus'	0.146399	7.04342	7.03706	-0.00636378
'IL1B'	'04010: MAPK signaling pathway, 04060: Cytokine-cytokine receptor interaction, 04210: Apoptosis, 04620: Toll-like receptor signaling pathway, 04640: Hematopoietic cell lineage, 04940: Type I diabetes mellitus, 05010: Alzheimer''s disease'	0.000553547	7.10401	7.04477	-0.0592479
'IL1R1'	'04010: MAPK signaling pathway, 04060: Cytokine-cytokine receptor interaction, 04210: Apoptosis, 04640: Hematopoietic cell lineage'	0.871799	7.01235	7.01496	0.00260716
'IL1R2'	'04010: MAPK signaling pathway, 04060: Cytokine-cytokine receptor interaction, 04640: Hematopoietic cell lineage'	0.00174413	6.89964	6.94857	0.048927
'IL1RAP'	'04060: Cytokine-cytokine receptor interaction, 04210: Apoptosis'	0.008942	7.04721	7.03938	-0.00782841
'IL2'	'04060: Cytokine-cytokine receptor interaction, 04630: Jak-STAT signaling pathway, 04660: T cell receptor signaling pathway, 04940: Type I diabetes mellitus'	0.457892	7.10225	7.10188	-0.000378825
'IL20'	'04060: Cytokine-cytokine receptor interaction, 04630: Jak-STAT signaling pathway'	1	7.02202	7.02351	0.00148909
'IL20RA'	'04060: Cytokine-cytokine receptor interaction, 04630: Jak-STAT signaling pathway'	0.113771	7.0387	7.03568	-0.00301868
'IL21'	'04060: Cytokine-cytokine receptor interaction, 04630: Jak-STAT signaling pathway'	0.871799	7.03487	7.03406	-0.000813442
'IL21R'	'04060: Cytokine-cytokine receptor interaction, 04630: Jak-STAT signaling pathway'	0.0259496	7.04723	7.0353	-0.011934
'IL22'	'04060: Cytokine-cytokine receptor interaction, 04630: Jak-STAT signaling pathway'	0.0658171	7.04255	7.03847	-0.00407887
'IL22RA1'	'04060: Cytokine-cytokine receptor interaction, 04630: Jak-STAT signaling pathway'	0.497916	6.95668	6.96129	0.00460724
'IL22RA2'	'04060: Cytokine-cytokine receptor interaction, 04630: Jak-STAT signaling pathway'	0.165192	7.03825	7.03532	-0.00292797
'IL23A'	'04060: Cytokine-cytokine receptor interaction, 04630: Jak-STAT signaling pathway'	0.0154943	7.06915	7.06042	-0.00873277
'IL23R'	'04060: Cytokine-cytokine receptor interaction, 04630: Jak-STAT signaling pathway'	0.722572	7.06754	7.06925	0.00171205
'IL24'	'04060: Cytokine-cytokine receptor interaction, 04630: Jak-STAT signaling pathway'	0.00331391	7.0309	7.0042	-0.0266947
'IL25'	'04060: Cytokine-cytokine receptor interaction'	0.208132	7.0449	7.03962	-0.00527413
'IL28A'	'04060: Cytokine-cytokine receptor interaction, 04630: Jak-STAT signaling pathway'	0.383524	7.01972	7.02703	0.00730221
'IL28B'	'04060: Cytokine-cytokine receptor interaction, 04630: Jak-STAT signaling pathway'	0.58323	7.03882	7.03761	-0.00120783
'IL28RA'	'04060: Cytokine-cytokine receptor interaction, 04630: Jak-STAT signaling pathway'	0.771454	7.01127	7.01062	-0.000650089
'IL29'	'04060: Cytokine-cytokine receptor interaction, 04630: Jak-STAT signaling pathway'	0.0184697	7.01453	7.02507	0.010542
'IL2RA'	'04060: Cytokine-cytokine receptor interaction, 04630: Jak-STAT signaling pathway, 04640: Hematopoietic cell lineage'	0.383524	7.06978	7.06806	-0.00171944
'IL2RB'	'04060: Cytokine-cytokine receptor interaction, 04630: Jak-STAT signaling pathway'	0.129287	7.02626	7.0287	0.00244157
'IL2RG'	'04060: Cytokine-cytokine receptor interaction, 04630: Jak-STAT signaling pathway'	0.258636	6.9857	6.99201	0.00631277
'IL3'	'04060: Cytokine-cytokine receptor interaction, 04210: Apoptosis, 04630: Jak-STAT signaling pathway, 04640: Hematopoietic cell lineage, 04664: Fc epsilon RI signaling pathway'	0.0420206	7.05689	7.04906	-0.00782296
'IL3RA'	'04060: Cytokine-cytokine receptor interaction, 04210: Apoptosis, 04630: Jak-STAT signaling pathway, 04640: Hematopoietic cell lineage'	0.317059	7.05882	7.04789	-0.0109345
'IL4'	'04060: Cytokine-cytokine receptor interaction, 04630: Jak-STAT signaling pathway, 04640: Hematopoietic cell lineage, 04660: T cell receptor signaling pathway, 04664: Fc epsilon RI signaling pathway'	0.185746	7.08086	7.07453	-0.00633437
'IL4R'	'04060: Cytokine-cytokine receptor interaction, 04630: Jak-STAT signaling pathway, 04640: Hematopoietic cell lineage'	0.00111506	7.0014	7.01389	0.0124858
'IL5'	'04060: Cytokine-cytokine receptor interaction, 04630: Jak-STAT signaling pathway, 04640: Hematopoietic cell lineage, 04660: T cell receptor signaling pathway, 04664: Fc epsilon RI signaling pathway'	0.419741	7.05486	7.05242	-0.00243351
'IL5RA'	'04060: Cytokine-cytokine receptor interaction, 04630: Jak-STAT signaling pathway, 04640: Hematopoietic cell lineage'	0.674797	7.04809	7.04567	-0.00242713
'IL6'	'04060: Cytokine-cytokine receptor interaction, 04620: Toll-like receptor signaling pathway, 04630: Jak-STAT signaling pathway, 04640: Hematopoietic cell lineage, 05060: Prion disease'	0.000701837	7.05592	7.00395	-0.0519643
'IL6R'	'04060: Cytokine-cytokine receptor interaction, 04630: Jak-STAT signaling pathway, 04640: Hematopoietic cell lineage'	0.008942	7.01337	7.0356	0.0222307
'IL6ST'	'04060: Cytokine-cytokine receptor interaction, 04630: Jak-STAT signaling pathway'	0.722572	7.0427	7.0458	0.00309542
'IL7'	'04060: Cytokine-cytokine receptor interaction, 04630: Jak-STAT signaling pathway, 04640: Hematopoietic cell lineage'	0.457892	6.99122	6.99388	0.00266125
'IL7R'	'04060: Cytokine-cytokine receptor interaction, 04630: Jak-STAT signaling pathway, 04640: Hematopoietic cell lineage'	0.457892	6.96246	6.97004	0.00757982
'IL8'	'04060: Cytokine-cytokine receptor interaction, 04620: Toll-like receptor signaling pathway, 04670: Leukocyte transendothelial migration, 05120: Epithelial cell signaling in Helicobacter pylori infection'	0.0129492	7.04381	6.98754	-0.056267
'IL9'	'04060: Cytokine-cytokine receptor interaction, 04630: Jak-STAT signaling pathway'	0.129287	7.04674	7.04008	-0.00665773
'IL9R'	'04060: Cytokine-cytokine receptor interaction, 04630: Jak-STAT signaling pathway, 04640: Hematopoietic cell lineage'	0.628299	7.03482	7.0286	-0.00622054
'ILK'	'03320: PPAR signaling pathway, 04510: Focal adhesion'	0.722572	7.15565	7.15531	-0.000333906
'IMPDH2'	'00230: Purine metabolism'	0.419741	6.87757	6.88303	0.00546078
'INA'	'01430: Cell Communication'	0.539729	7.03073	7.03248	0.00174526
'INADL'	'04530: Tight junction'	0.539729	7.04322	7.04269	-0.000535907
'INHBA'	'04060: Cytokine-cytokine receptor interaction, 04350: TGF-beta signaling pathway'	0.00216862	7.0539	7.03674	-0.0171601
'INHBB'	'04060: Cytokine-cytokine receptor interaction, 04350: TGF-beta signaling pathway'	0.00407286	7.04293	7.0184	-0.0245354
'INHBC'	'04060: Cytokine-cytokine receptor interaction, 04350: TGF-beta signaling pathway'	0.419741	7.0001	7.00458	0.00447426
'INHBE'	'04060: Cytokine-cytokine receptor interaction, 04350: TGF-beta signaling pathway'	0.0259496	7.04164	7.03379	-0.00784348
'INPP4A'	'00562: Inositol phosphate metabolism, 04070: Phosphatidylinositol signaling system'	0.922866	7.03441	7.0349	0.00049442
'INPP5A'	'00562: Inositol phosphate metabolism, 04070: Phosphatidylinositol signaling system'	0.165192	6.98938	6.99398	0.0046022
'INPP5B'	'00562: Inositol phosphate metabolism, 04070: Phosphatidylinositol signaling system'	0.58323	7.03682	7.03125	-0.00557186
'INPP5D'	'04070: Phosphatidylinositol signaling system, 04662: B cell receptor signaling pathway, 04664: Fc epsilon RI signaling pathway, 04910: Insulin signaling pathway'	0.00738835	7.08784	7.07597	-0.0118709
'INPP5E'	'00562: Inositol phosphate metabolism, 04070: Phosphatidylinositol signaling system'	0.00331391	6.97174	6.98218	0.0104388
'INPPL1'	'00562: Inositol phosphate metabolism, 04070: Phosphatidylinositol signaling system'	0.349288	7.01838	7.02019	0.00180903
'INS'	'04140: Regulation of autophagy, 04150: mTOR signaling pathway, 04810: Regulation of actin cytoskeleton, 04910: Insulin signaling pathway, 04930: Type II diabetes mellitus, 04940: Type I diabetes mellitus, 04950: Maturity onset diabetes of the young, 05050: Dentatorubropallidoluysian atrophy (DRPLA)'	0.232412	7.12642	7.12102	-0.00539862
'INSR'	'04520: Adherens junction, 04910: Insulin signaling pathway, 04930: Type II diabetes mellitus, 05050: Dentatorubropallidoluysian atrophy (DRPLA)'	0.349288	7.0468	7.05224	0.00543511
'IQGAP1'	'04520: Adherens junction, 04810: Regulation of actin cytoskeleton'	0.771454	7.17697	7.17634	-0.000634998
'IQGAP2'	'04810: Regulation of actin cytoskeleton'	0.974253	7.05145	7.05004	-0.00141346
'IQGAP3'	'04810: Regulation of actin cytoskeleton'	0.0997601	7.10497	7.09767	-0.00730194
'IRAK1'	'04210: Apoptosis, 04620: Toll-like receptor signaling pathway'	0.232412	6.98686	6.9799	-0.00696217
'IRAK2'	'04210: Apoptosis'	0.035917	7.05383	7.04999	-0.00383582
'IRAK3'	'04210: Apoptosis'	0.129287	7.0404	7.03589	-0.00451359
'IRAK4'	'04210: Apoptosis, 04620: Toll-like receptor signaling pathway'	0.628299	7.02165	7.02292	0.00127002
'IRF3'	'04620: Toll-like receptor signaling pathway'	0.129287	6.962	6.96669	0.00469241
'IRS1'	'04910: Insulin signaling pathway, 04920: Adipocytokine signaling pathway, 04930: Type II diabetes mellitus'	0.113771	7.10904	7.0979	-0.011133
'IRS2'	'04910: Insulin signaling pathway, 04920: Adipocytokine signaling pathway, 04930: Type II diabetes mellitus'	0.129287	7.04239	7.03511	-0.00728069
'IRS4'	'04910: Insulin signaling pathway, 04920: Adipocytokine signaling pathway, 04930: Type II diabetes mellitus'	0.821261	7.06905	7.07374	0.00469728
'ISYNA1'	'00521: Streptomycin biosynthesis, 00562: Inositol phosphate metabolism'	0.539729	7.03198	7.02794	-0.00403858
'ITCH'	'04120: Ubiquitin mediated proteolysis, 05050: Dentatorubropallidoluysian atrophy (DRPLA)'	0.922866	7.05638	7.05653	0.00015219
'ITGA1'	'04510: Focal adhesion, 04512: ECM-receptor interaction, 04640: Hematopoietic cell lineage, 04810: Regulation of actin cytoskeleton'	0.00139729	7.0521	7.0375	-0.0146047
'ITGA10'	'04510: Focal adhesion, 04512: ECM-receptor interaction, 04810: Regulation of actin cytoskeleton'	0.165192	7.01567	7.0196	0.00392279
'ITGA11'	'04510: Focal adhesion, 04512: ECM-receptor interaction, 04810: Regulation of actin cytoskeleton'	0.0489799	7.10433	7.09811	-0.00622643
'ITGA2'	'04510: Focal adhesion, 04512: ECM-receptor interaction, 04640: Hematopoietic cell lineage, 04810: Regulation of actin cytoskeleton'	0.00111506	7.09685	7.08184	-0.0150132
'ITGA2B'	'04510: Focal adhesion, 04512: ECM-receptor interaction, 04640: Hematopoietic cell lineage, 04810: Regulation of actin cytoskeleton'	0.129287	7.0777	7.07108	-0.00661234
'ITGA3'	'04510: Focal adhesion, 04512: ECM-receptor interaction, 04640: Hematopoietic cell lineage, 04810: Regulation of actin cytoskeleton'	0.087161	7.03798	7.04803	0.0100474
'ITGA4'	'04510: Focal adhesion, 04512: ECM-receptor interaction, 04514: Cell adhesion molecules (CAMs), 04640: Hematopoietic cell lineage, 04670: Leukocyte transendothelial migration, 04810: Regulation of actin cytoskeleton'	0.457892	7.04667	7.04213	-0.00453235
'ITGA5'	'04510: Focal adhesion, 04512: ECM-receptor interaction, 04640: Hematopoietic cell lineage, 04810: Regulation of actin cytoskeleton'	0.00012268	7.05344	7.01126	-0.0421878
'ITGA6'	'01430: Cell Communication, 04510: Focal adhesion, 04512: ECM-receptor interaction, 04514: Cell adhesion molecules (CAMs), 04640: Hematopoietic cell lineage, 04810: Regulation of actin cytoskeleton'	0.0420206	7.11227	7.1045	-0.00777653
'ITGA7'	'04510: Focal adhesion, 04512: ECM-receptor interaction, 04810: Regulation of actin cytoskeleton'	0.0154943	7.03993	7.02658	-0.0133444
'ITGA8'	'04510: Focal adhesion, 04512: ECM-receptor interaction, 04514: Cell adhesion molecules (CAMs), 04810: Regulation of actin cytoskeleton'	0.539729	7.03924	7.04618	0.00694139
'ITGA9'	'04510: Focal adhesion, 04512: ECM-receptor interaction, 04514: Cell adhesion molecules (CAMs), 04810: Regulation of actin cytoskeleton'	0.087161	7.03823	7.04586	0.00763049
'ITGAD'	'04810: Regulation of actin cytoskeleton'	0.674797	7.0351	7.03352	-0.0015793
'ITGAE'	'04810: Regulation of actin cytoskeleton'	0.00331391	6.9874	7.00224	0.0148405
'ITGAL'	'04514: Cell adhesion molecules (CAMs), 04650: Natural killer cell mediated cytotoxicity, 04670: Leukocyte transendothelial migration, 04810: Regulation of actin cytoskeleton'	0.0305861	6.99571	7.01277	0.0170526
'ITGAM'	'04514: Cell adhesion molecules (CAMs), 04640: Hematopoietic cell lineage, 04670: Leukocyte transendothelial migration, 04810: Regulation of actin cytoskeleton'	0.419741	7.04402	7.04639	0.00237183
'ITGAV'	'04510: Focal adhesion, 04512: ECM-receptor interaction, 04514: Cell adhesion molecules (CAMs), 04810: Regulation of actin cytoskeleton'	0.419741	7.10906	7.11602	0.00696188
'ITGAX'	'04810: Regulation of actin cytoskeleton'	0.317059	7.04763	7.04544	-0.00218946
'ITGB1'	'04360: Axon guidance, 04510: Focal adhesion, 04512: ECM-receptor interaction, 04514: Cell adhesion molecules (CAMs), 04670: Leukocyte transendothelial migration, 04810: Regulation of actin cytoskeleton, 05130: Pathogenic Escherichia coli infection - EHEC, 05131: Pathogenic Escherichia coli infection - EPEC'	0.0154943	7.20633	7.19977	-0.0065637
'ITGB1BP3'	'00562: Inositol phosphate metabolism, 00632: Benzoate degradation via CoA ligation, 00760: Nicotinate and nicotinamide metabolism, 04070: Phosphatidylinositol signaling system'	0.974253	7.03132	7.02932	-0.00199593
'ITGB2'	'04514: Cell adhesion molecules (CAMs), 04650: Natural killer cell mediated cytotoxicity, 04670: Leukocyte transendothelial migration, 04810: Regulation of actin cytoskeleton'	0.674797	7.07577	7.07923	0.00345864
'ITGB3'	'04510: Focal adhesion, 04512: ECM-receptor interaction, 04640: Hematopoietic cell lineage, 04810: Regulation of actin cytoskeleton'	0.722572	7.12073	7.11961	-0.00111535
'ITGB4'	'01430: Cell Communication, 04510: Focal adhesion, 04512: ECM-receptor interaction, 04810: Regulation of actin cytoskeleton'	0.674797	7.1282	7.12949	0.00129502
'ITGB5'	'04510: Focal adhesion, 04512: ECM-receptor interaction, 04810: Regulation of actin cytoskeleton'	0.0420206	7.08293	7.09468	0.0117474
'ITGB6'	'04510: Focal adhesion, 04512: ECM-receptor interaction, 04810: Regulation of actin cytoskeleton'	0.258636	7.0305	7.02659	-0.00391404
'ITGB7'	'04510: Focal adhesion, 04512: ECM-receptor interaction, 04514: Cell adhesion molecules (CAMs), 04810: Regulation of actin cytoskeleton'	0.129287	7.02086	7.03063	0.00976602
'ITGB8'	'04510: Focal adhesion, 04512: ECM-receptor interaction, 04514: Cell adhesion molecules (CAMs), 04810: Regulation of actin cytoskeleton'	0.349288	7.04142	7.04077	-0.0006564
'ITK'	'04660: T cell receptor signaling pathway, 04670: Leukocyte transendothelial migration'	0.497916	7.0406	7.04028	-0.000327096
'ITPK1'	'00562: Inositol phosphate metabolism, 04070: Phosphatidylinositol signaling system'	0.317059	7.12425	7.12729	0.00304811
'ITPKA'	'00562: Inositol phosphate metabolism, 04020: Calcium signaling pathway, 04070: Phosphatidylinositol signaling system'	0.000886374	6.98262	7.00707	0.0244551
'ITPKB'	'00562: Inositol phosphate metabolism, 04020: Calcium signaling pathway, 04070: Phosphatidylinositol signaling system'	0.317059	7.03904	7.03458	-0.00445922
'ITPR1'	'04020: Calcium signaling pathway, 04070: Phosphatidylinositol signaling system, 04540: Gap junction, 04720: Long-term potentiation, 04730: Long-term depression, 04912: GnRH signaling pathway'	0.58323	7.05901	7.06232	0.00330735
'ITPR2'	'04020: Calcium signaling pathway, 04070: Phosphatidylinositol signaling system, 04540: Gap junction, 04720: Long-term potentiation, 04730: Long-term depression, 04912: GnRH signaling pathway'	0.628299	7.02882	7.03034	0.00151705
'ITPR3'	'04020: Calcium signaling pathway, 04070: Phosphatidylinositol signaling system, 04540: Gap junction, 04720: Long-term potentiation, 04730: Long-term depression, 04742: Taste transduction, 04912: GnRH signaling pathway'	0.165192	7.03101	7.02543	-0.00558292
'JAG1'	'04330: Notch signaling pathway'	0.0107811	7.0062	7.01419	0.00799054
'JAG2'	'04330: Notch signaling pathway'	0.0154943	7.00941	6.99735	-0.01206
'JAK1'	'04630: Jak-STAT signaling pathway, 04920: Adipocytokine signaling pathway, 05212: Pancreatic cancer'	0.419741	7.12017	7.12328	0.00311079
'JAK2'	'04630: Jak-STAT signaling pathway, 04920: Adipocytokine signaling pathway'	0.383524	7.16787	7.17087	0.00300091
'JAK3'	'04630: Jak-STAT signaling pathway, 04920: Adipocytokine signaling pathway'	0.628299	7.09056	7.08999	-0.000570821
'JAM2'	'04514: Cell adhesion molecules (CAMs), 04530: Tight junction, 04670: Leukocyte transendothelial migration, 05120: Epithelial cell signaling in Helicobacter pylori infection'	0.771454	7.00486	7.00694	0.0020783
'JAM3'	'04514: Cell adhesion molecules (CAMs), 04530: Tight junction, 04670: Leukocyte transendothelial migration, 05120: Epithelial cell signaling in Helicobacter pylori infection'	0.497916	7.02351	7.02758	0.00406775
'JUN'	'04010: MAPK signaling pathway, 04310: Wnt signaling pathway, 04510: Focal adhesion, 04620: Toll-like receptor signaling pathway, 04660: T cell receptor signaling pathway, 04662: B cell receptor signaling pathway, 04912: GnRH signaling pathway, 05120: Epithelial cell signaling in Helicobacter pylori infection, 05210: Colorectal cancer'	0.922866	7.1597	7.16441	0.00470902
'JUND'	'04010: MAPK signaling pathway'	0.821261	7.00297	7.00878	0.00580583
'KARS'	'00300: Lysine biosynthesis, 00970: Aminoacyl-tRNA biosynthesis, 05030: Amyotrophic lateral sclerosis (ALS)'	0.974253	7.084	7.08269	-0.00131594
'KCNB1'	'04742: Taste transduction'	0.208132	7.02182	7.02788	0.00605764
'KCNJ11'	'04930: Type II diabetes mellitus'	0.383524	7.03973	7.03495	-0.00477891
'KDR'	'04060: Cytokine-cytokine receptor interaction, 04370: VEGF signaling pathway, 04510: Focal adhesion'	0.000205946	7.06446	7.03993	-0.0245265
'KHK'	'00051: Fructose and mannose metabolism'	0.208132	7.04071	7.03723	-0.00348593
'KIR2DL1'	'04612: Antigen processing and presentation, 04650: Natural killer cell mediated cytotoxicity'	0.58323	7.04514	7.04525	0.000109174
'KIR2DL2'	'04612: Antigen processing and presentation, 04650: Natural killer cell mediated cytotoxicity'	0.539729	7.04232	7.04286	0.000548008
'KIR2DL3'	'04612: Antigen processing and presentation, 04650: Natural killer cell mediated cytotoxicity'	0.0489799	7.02034	7.03583	0.0154834
'KIR2DL4'	'04612: Antigen processing and presentation, 04650: Natural killer cell mediated cytotoxicity'	0.922866	7.03263	7.03075	-0.0018827
'KIR2DL5A'	'04612: Antigen processing and presentation, 04650: Natural killer cell mediated cytotoxicity'	0.628299	7.02188	7.02271	0.000820607
'KIR2DS1'	'04612: Antigen processing and presentation, 04650: Natural killer cell mediated cytotoxicity'	0.087161	7.02492	7.03776	0.01284
'KIR2DS2'	'04612: Antigen processing and presentation, 04650: Natural killer cell mediated cytotoxicity'	1	7.04526	7.0476	0.00233478
'KIR2DS3'	'04612: Antigen processing and presentation'	0.922866	7.04043	7.04268	0.00224607
'KIR3DL1'	'04612: Antigen processing and presentation, 04650: Natural killer cell mediated cytotoxicity'	1	7.04229	7.04081	-0.00147848
'KIR3DL2'	'04612: Antigen processing and presentation, 04650: Natural killer cell mediated cytotoxicity'	0.087161	7.03037	7.03496	0.00459407
'KIT'	'04060: Cytokine-cytokine receptor interaction, 04640: Hematopoietic cell lineage, 04916: Melanogenesis'	0.165192	7.03249	7.04246	0.00996996
'KITLG'	'04060: Cytokine-cytokine receptor interaction, 04640: Hematopoietic cell lineage, 04916: Melanogenesis'	0.317059	7.05219	7.04996	-0.00222694
'KLKB1'	'04610: Complement and coagulation cascades'	0.674797	7.03963	7.04091	0.00127467
'KLRC2'	'04612: Antigen processing and presentation, 04650: Natural killer cell mediated cytotoxicity'	0.0489799	7.01498	7.02634	0.0113629
'KLRC3'	'04612: Antigen processing and presentation, 04650: Natural killer cell mediated cytotoxicity'	0.286844	7.03246	7.03981	0.00735185
'KLRC4'	'04612: Antigen processing and presentation'	0.258636	7.02721	7.03436	0.007149
'KLRD1'	'04612: Antigen processing and presentation, 04650: Natural killer cell mediated cytotoxicity'	0.035917	7.0119	7.02348	0.011586
'KLRK1'	'04650: Natural killer cell mediated cytotoxicity'	0.0758785	7.00284	7.01626	0.0134221
'KNG1'	'04610: Complement and coagulation cascades'	0.722572	7.04865	7.05388	0.00523222
'KRAS'	'04010: MAPK signaling pathway, 04320: Dorso-ventral axis formation, 04360: Axon guidance, 04370: VEGF signaling pathway, 04530: Tight junction, 04540: Gap junction, 04650: Natural killer cell mediated cytotoxicity, 04660: T cell receptor signaling pathway, 04662: B cell receptor signaling pathway, 04664: Fc epsilon RI signaling pathway, 04720: Long-term potentiation, 04730: Long-term depression,…	0.0420206	7.10349	7.11325	0.00975958
'KRT1'	'01430: Cell Communication'	0.286844	7.09668	7.09811	0.00142978
'KRT10'	'01430: Cell Communication'	0.286844	6.97839	6.98276	0.00436983
'KRT13'	'01430: Cell Communication'	0.771454	7.07697	7.07542	-0.0015529
'KRT14'	'01430: Cell Communication'	0.539729	7.08342	7.08154	-0.00188568
'KRT15'	'01430: Cell Communication'	0.0758785	7.04873	7.04084	-0.00788463
'KRT16'	'01430: Cell Communication'	0.419741	7.08355	7.08513	0.00158356
'KRT17'	'01430: Cell Communication'	0.00139729	7.08149	7.06932	-0.0121673
'KRT18'	'01430: Cell Communication, 05130: Pathogenic Escherichia coli infection - EHEC, 05131: Pathogenic Escherichia coli infection - EPEC'	0.232412	6.91268	6.92732	0.0146341
'KRT19'	'01430: Cell Communication'	0.00738835	6.83796	6.86031	0.0223544
'KRT31'	'01430: Cell Communication'	0.974253	7.0301	7.03269	0.00258282
'KRT32'	'01430: Cell Communication'	0.457892	7.04241	7.03968	-0.00272954
'KRT33A'	'01430: Cell Communication'	0.258636	7.04105	7.03757	-0.00347477
'KRT33B'	'01430: Cell Communication'	0.871799	7.04732	7.04568	-0.00164108
'KRT35'	'01430: Cell Communication'	0.497916	7.04454	7.04231	-0.00222106
'KRT4'	'01430: Cell Communication'	0.349288	7.0448	7.04319	-0.00160966
'KRT5'	'01430: Cell Communication'	0.113771	7.09784	7.09314	-0.00470292
'KRT6B'	'01430: Cell Communication'	0.035917	7.06947	7.05373	-0.0157435
'KRT7'	'01430: Cell Communication'	0.0305861	7.04341	7.03895	-0.0044609
'KRT8'	'01430: Cell Communication'	0.871799	7.08681	7.08478	-0.00202363
'KRT81'	'01430: Cell Communication'	0.165192	7.03193	7.03754	0.00560599
'KRT85'	'01430: Cell Communication'	0.539729	7.03846	7.03184	-0.0066205
'KRT9'	'01430: Cell Communication'	0.821261	7.08761	7.08867	0.00105422
'L1CAM'	'04360: Axon guidance, 04514: Cell adhesion molecules (CAMs)'	0.58323	7.0586	7.05804	-0.000560886
'LALBA'	'00052: Galactose metabolism'	0.165192	7.04507	7.04037	-0.00470589
'LAMA1'	'01430: Cell Communication, 04510: Focal adhesion, 04512: ECM-receptor interaction, 05060: Prion disease'	0.146399	7.0399	7.04971	0.0098149
'LAMA2'	'01430: Cell Communication, 04510: Focal adhesion, 04512: ECM-receptor interaction'	0.349288	7.03246	7.03497	0.00250967
'LAMA3'	'01430: Cell Communication, 04510: Focal adhesion, 04512: ECM-receptor interaction'	0.317059	7.03831	7.04364	0.00533211
'LAMA4'	'01430: Cell Communication, 04510: Focal adhesion, 04512: ECM-receptor interaction'	0.419741	7.04909	7.04839	-0.000703851
'LAMA5'	'01430: Cell Communication, 04510: Focal adhesion, 04512: ECM-receptor interaction'	0.0219336	7.03791	7.03052	-0.00738659
'LAMB1'	'01430: Cell Communication, 04510: Focal adhesion, 04512: ECM-receptor interaction, 05060: Prion disease'	0.821261	7.01591	7.01792	0.002003
'LAMB2'	'01430: Cell Communication, 04510: Focal adhesion, 04512: ECM-receptor interaction'	0.0259496	7.02176	7.00922	-0.0125458
'LAMB3'	'01430: Cell Communication, 04510: Focal adhesion, 04512: ECM-receptor interaction'	1	6.94721	6.94731	9.91951e-05
'LAMC1'	'01430: Cell Communication, 04510: Focal adhesion, 04512: ECM-receptor interaction, 05060: Prion disease'	0.000701837	7.00417	6.97751	-0.0266581
'LAMC2'	'01430: Cell Communication, 04510: Focal adhesion, 04512: ECM-receptor interaction'	0.349288	7.02046	7.0147	-0.00576125
'LAMC3'	'01430: Cell Communication, 04510: Focal adhesion, 04512: ECM-receptor interaction'	0.419741	7.02853	7.02959	0.00106095
'LARS'	'00290: Valine, leucine and isoleucine biosynthesis, 00970: Aminoacyl-tRNA biosynthesis'	0.0420206	6.94833	6.95553	0.00720115
'LAT'	'04650: Natural killer cell mediated cytotoxicity, 04660: T cell receptor signaling pathway, 04664: Fc epsilon RI signaling pathway'	0.056882	7.08113	7.0942	0.0130692
'LBP'	'04620: Toll-like receptor signaling pathway'	0.286844	7.04485	7.03967	-0.00517624
'LCAT'	'00564: Glycerophospholipid metabolism'	0.258636	7.04757	7.04601	-0.00156125
'LCK'	'04650: Natural killer cell mediated cytotoxicity, 04660: T cell receptor signaling pathway'	0.628299	7.10584	7.10455	-0.00129398
'LCMT1'	'00150: Androgen and estrogen metabolism, 00340: Histidine metabolism, 00350: Tyrosine metabolism, 00380: Tryptophan metabolism, 00440: Aminophosphonate metabolism, 00450: Selenoamino acid metabolism, 00626: Nitrobenzene degradation'	0.722572	7.03604	7.03491	-0.00112581
'LCP2'	'04650: Natural killer cell mediated cytotoxicity, 04660: T cell receptor signaling pathway, 04664: Fc epsilon RI signaling pathway'	0.457892	7.07062	7.06646	-0.00416151
'LCT'	'00052: Galactose metabolism, 00511: N-Glycan degradation, 00531: Glycosaminoglycan degradation, 00561: Glycerolipid metabolism, 00600: Sphingolipid metabolism, 00604: Glycosphingolipid biosynthesis - ganglioseries, 01032: Glycan structures - degradation'	0.087161	7.02719	7.03135	0.00416606
'LDHA'	'00010: Glycolysis / Gluconeogenesis, 00272: Cysteine metabolism, 00620: Pyruvate metabolism, 00640: Propanoate metabolism'	0.232412	6.93703	6.95113	0.0140975
'LDHAL6A'	'00010: Glycolysis / Gluconeogenesis, 00272: Cysteine metabolism, 00620: Pyruvate metabolism, 00640: Propanoate metabolism'	0.58323	7.10933	7.11124	0.00191129
'LDHB'	'00010: Glycolysis / Gluconeogenesis, 00272: Cysteine metabolism, 00620: Pyruvate metabolism, 00640: Propanoate metabolism'	0.821261	6.88481	6.87689	-0.00791739
'LEF1'	'04310: Wnt signaling pathway, 04520: Adherens junction, 04916: Melanogenesis, 05210: Colorectal cancer, 05216: Thyroid cancer, 05217: Basal cell carcinoma'	0.056882	7.06111	7.05171	-0.00939852
'LEP'	'04060: Cytokine-cytokine receptor interaction, 04080: Neuroactive ligand-receptor interaction, 04630: Jak-STAT signaling pathway, 04920: Adipocytokine signaling pathway'	0.539729	7.04651	7.04119	-0.00531644
'LEPR'	'04060: Cytokine-cytokine receptor interaction, 04080: Neuroactive ligand-receptor interaction, 04630: Jak-STAT signaling pathway, 04920: Adipocytokine signaling pathway'	0.922866	7.02593	7.02324	-0.00268627
'LFNG'	'04330: Notch signaling pathway'	0.056882	6.99516	7.01023	0.0150706
'LHB'	'04080: Neuroactive ligand-receptor interaction, 04912: GnRH signaling pathway'	0.286844	7.0289	7.03148	0.00258331
'LHCGR'	'04020: Calcium signaling pathway, 04080: Neuroactive ligand-receptor interaction'	0.0489799	7.04861	7.04472	-0.00388583
'LIF'	'04060: Cytokine-cytokine receptor interaction, 04630: Jak-STAT signaling pathway'	0.208132	7.00649	7.00179	-0.00469566
'LIFR'	'04060: Cytokine-cytokine receptor interaction, 04630: Jak-STAT signaling pathway'	0.457892	7.03708	7.03975	0.00267657
'LIMK1'	'04360: Axon guidance, 04810: Regulation of actin cytoskeleton'	0.00139729	7.07204	7.05843	-0.0136067
'LIMK2'	'04360: Axon guidance, 04810: Regulation of actin cytoskeleton'	0.497916	6.98274	6.98571	0.00296619
'LIPC'	'00561: Glycerolipid metabolism'	0.821261	7.04194	7.03968	-0.00225236
'LIPE'	'04910: Insulin signaling pathway'	0.0489799	7.03976	7.031	-0.00876235
'LLGL1'	'04530: Tight junction'	0.628299	7.0329	7.03076	-0.00213892
'LLGL2'	'04530: Tight junction'	0.0259496	7.01764	7.02946	0.0118285
'LMNA'	'01430: Cell Communication'	0.628299	7.16375	7.16787	0.00412051
'LMNB1'	'01430: Cell Communication'	0.922866	6.96352	6.9659	0.00237851
'LMNB2'	'01430: Cell Communication'	0.087161	6.98148	6.96505	-0.0164292
'LMO7'	'04520: Adherens junction'	0.349288	7.14592	7.14981	0.00389023
'LNX1'	'00380: Tryptophan metabolism'	0.113771	7.01321	7.0185	0.00529716
'LPL'	'00561: Glycerolipid metabolism, 03320: PPAR signaling pathway, 05010: Alzheimer''s disease'	0.000701837	7.04806	7.01844	-0.0296287
'LRP1'	'05010: Alzheimer''s disease'	0.722572	7.06792	7.06935	0.00142666
'LRP2'	'04340: Hedgehog signaling pathway'	0.922866	7.05127	7.04762	-0.0036489
'LRP5'	'04310: Wnt signaling pathway'	0.0758785	7.04239	7.03563	-0.00675472
'LRP6'	'04310: Wnt signaling pathway'	0.000553547	7.00189	7.02014	0.0182577
'LRRK2'	'01510: Neurodegenerative Disorders'	0.056882	7.02346	7.01568	-0.00778346
'LRSAM1'	'00380: Tryptophan metabolism'	0.00331391	7.03606	7.02726	-0.00879882
'LTA'	'04060: Cytokine-cytokine receptor interaction, 04612: Antigen processing and presentation, 04940: Type I diabetes mellitus'	0.0489799	7.05492	7.04936	-0.00555227
'LTA4H'	'00590: Arachidonic acid metabolism'	1	6.90298	6.90468	0.00170016
'LTB'	'04060: Cytokine-cytokine receptor interaction'	0.087161	6.9987	7.00712	0.00841353
'LTB4R'	'04080: Neuroactive ligand-receptor interaction'	0.457892	7.03326	7.03002	-0.00324159
'LTBP1'	'04350: TGF-beta signaling pathway'	0.821261	7.01798	7.0196	0.00161884
'LTBR'	'04060: Cytokine-cytokine receptor interaction'	0.497916	7.02572	7.02826	0.00254634
'LY96'	'04620: Toll-like receptor signaling pathway, 05130: Pathogenic Escherichia coli infection - EHEC, 05131: Pathogenic Escherichia coli infection - EPEC'	0.922866	6.99582	6.99096	-0.00485347
'LYN'	'04662: B cell receptor signaling pathway, 04664: Fc epsilon RI signaling pathway, 04730: Long-term depression, 05120: Epithelial cell signaling in Helicobacter pylori infection'	0.0129492	7.07586	7.05789	-0.0179662
'LYPLA1'	'00564: Glycerophospholipid metabolism'	0.58323	6.87901	6.88646	0.0074574
'MAD1L1'	'04110: Cell cycle'	0.771454	7.17311	7.17178	-0.00133762
'MAD2L1'	'04110: Cell cycle'	0.232412	7.00516	6.96587	-0.0392939
'MAD2L2'	'04110: Cell cycle'	0.056882	6.99898	6.98549	-0.0134921
'MADCAM1'	'04514: Cell adhesion molecules (CAMs)'	0.922866	6.99153	6.98686	-0.00467553
'MAG'	'04514: Cell adhesion molecules (CAMs)'	0.821261	7.10774	7.10955	0.00181036
'MAGI1'	'04530: Tight junction, 05050: Dentatorubropallidoluysian atrophy (DRPLA)'	0.286844	7.11407	7.11894	0.00486342
'MAGI2'	'04530: Tight junction, 05050: Dentatorubropallidoluysian atrophy (DRPLA)'	0.185746	7.05271	7.04674	-0.00597027
'MAGI3'	'04530: Tight junction'	0.0658171	7.01623	7.03004	0.0138062
'MALT1'	'04660: T cell receptor signaling pathway, 04662: B cell receptor signaling pathway'	0.58323	7.02131	7.0185	-0.00281351
'MAML1'	'04330: Notch signaling pathway'	0.208132	6.94052	6.94261	0.00209742
'MAML3'	'04330: Notch signaling pathway'	0.871799	7.04276	7.04217	-0.000594995
'MAN1A2'	'00510: N-Glycan biosynthesis, 01030: Glycan structures - biosynthesis 1'	0.539729	7.02267	7.01979	-0.00287902
'MAN1C1'	'00510: N-Glycan biosynthesis, 01030: Glycan structures - biosynthesis 1'	0.0658171	7.00455	7.01344	0.00888505
'MAN2A2'	'00510: N-Glycan biosynthesis, 01030: Glycan structures - biosynthesis 1'	0.974253	6.99147	6.99149	1.69255e-05
'MAN2B1'	'00511: N-Glycan degradation, 01032: Glycan structures - degradation'	0.0305861	6.93684	6.94974	0.0128949
'MAOA'	'00220: Urea cycle and metabolism of amino groups, 00260: Glycine, serine and threonine metabolism, 00340: Histidine metabolism, 00350: Tyrosine metabolism, 00360: Phenylalanine metabolism, 00380: Tryptophan metabolism'	0.0658171	6.93029	6.95706	0.0267745
'MAP2K1'	'04010: MAPK signaling pathway, 04320: Dorso-ventral axis formation, 04370: VEGF signaling pathway, 04510: Focal adhesion, 04540: Gap junction, 04650: Natural killer cell mediated cytotoxicity, 04664: Fc epsilon RI signaling pathway, 04720: Long-term potentiation, 04730: Long-term depression, 04810: Regulation of actin cytoskeleton, 04910: Insulin signaling pathway, 04912: GnRH signaling pathway,…	0.056882	6.98306	6.96661	-0.0164508
'MAP2K2'	'04010: MAPK signaling pathway, 04370: VEGF signaling pathway, 04540: Gap junction, 04650: Natural killer cell mediated cytotoxicity, 04664: Fc epsilon RI signaling pathway, 04720: Long-term potentiation, 04730: Long-term depression, 04810: Regulation of actin cytoskeleton, 04910: Insulin signaling pathway, 04912: GnRH signaling pathway, 04916: Melanogenesis, 05214: Glioma, 05216: Thyroid cancer,…	0.258636	7.13459	7.14039	0.00580441
'MAP2K3'	'04010: MAPK signaling pathway, 04620: Toll-like receptor signaling pathway, 04664: Fc epsilon RI signaling pathway, 04912: GnRH signaling pathway'	0.539729	7.11198	7.11162	-0.00036335
'MAP2K4'	'04010: MAPK signaling pathway, 04620: Toll-like receptor signaling pathway, 04664: Fc epsilon RI signaling pathway, 04912: GnRH signaling pathway, 05120: Epithelial cell signaling in Helicobacter pylori infection'	0.349288	7.13131	7.13204	0.000739395
'MAP2K5'	'04010: MAPK signaling pathway, 04540: Gap junction'	0.628299	7.04086	7.04119	0.000330203
'MAP2K6'	'04010: MAPK signaling pathway, 04620: Toll-like receptor signaling pathway, 04664: Fc epsilon RI signaling pathway, 04912: GnRH signaling pathway'	0.113771	7.00978	7.02263	0.0128504
'MAP2K7'	'04010: MAPK signaling pathway, 04664: Fc epsilon RI signaling pathway, 04912: GnRH signaling pathway'	0.146399	7.20111	7.19663	-0.00448027
'MAP3K1'	'04010: MAPK signaling pathway, 04912: GnRH signaling pathway'	1	7.18988	7.18944	-0.000440968
'MAP3K10'	'04010: MAPK signaling pathway'	0.58323	7.05231	7.05224	-7.4358e-05
'MAP3K12'	'04010: MAPK signaling pathway'	0.383524	7.03524	7.02994	-0.00529862
'MAP3K13'	'04010: MAPK signaling pathway'	0.035917	7.00283	7.01208	0.00924684
'MAP3K14'	'04010: MAPK signaling pathway, 04210: Apoptosis, 04660: T cell receptor signaling pathway, 05120: Epithelial cell signaling in Helicobacter pylori infection'	0.000553547	7.07457	7.08056	0.00598345
'MAP3K2'	'04010: MAPK signaling pathway, 04540: Gap junction, 04912: GnRH signaling pathway'	0.628299	7.02959	7.03068	0.00108929
'MAP3K3'	'04010: MAPK signaling pathway, 04912: GnRH signaling pathway'	1	7.10517	7.10257	-0.00260157
'MAP3K4'	'04010: MAPK signaling pathway, 04912: GnRH signaling pathway'	0.00608134	7.02846	7.03575	0.00729127
'MAP3K5'	'04010: MAPK signaling pathway'	0.628299	7.15693	7.15731	0.000375716
'MAP3K6'	'04010: MAPK signaling pathway'	0.286844	7.03103	7.0275	-0.00353513
'MAP3K7'	'04010: MAPK signaling pathway, 04310: Wnt signaling pathway, 04520: Adherens junction, 04620: Toll-like receptor signaling pathway'	0.539729	7.11179	7.11221	0.000419659
'MAP3K8'	'04010: MAPK signaling pathway, 04660: T cell receptor signaling pathway'	0.539729	7.04389	7.04365	-0.000240478
'MAP4K1'	'04010: MAPK signaling pathway'	0.539729	7.06099	7.05134	-0.00965015
'MAP4K2'	'04010: MAPK signaling pathway'	0.087161	7.04342	7.03589	-0.00753458
'MAP4K3'	'04010: MAPK signaling pathway'	0.974253	7.01028	7.01008	-0.000192572
'MAP4K4'	'04010: MAPK signaling pathway'	0.00498637	7.03125	7.0222	-0.00904168
'MAPK1'	'04010: MAPK signaling pathway, 04150: mTOR signaling pathway, 04320: Dorso-ventral axis formation, 04350: TGF-beta signaling pathway, 04360: Axon guidance, 04370: VEGF signaling pathway, 04510: Focal adhesion, 04520: Adherens junction, 04540: Gap junction, 04650: Natural killer cell mediated cytotoxicity, 04664: Fc epsilon RI signaling pathway, 04720: Long-term potentiation, 04730: Long-term dep…	0.146399	7.18619	7.18311	-0.0030821
'MAPK10'	'04010: MAPK signaling pathway, 04310: Wnt signaling pathway, 04510: Focal adhesion, 04620: Toll-like receptor signaling pathway, 04664: Fc epsilon RI signaling pathway, 04910: Insulin signaling pathway, 04912: GnRH signaling pathway, 04920: Adipocytokine signaling pathway, 04930: Type II diabetes mellitus, 05120: Epithelial cell signaling in Helicobacter pylori infection, 05210: Colorectal cance…	0.974253	7.05381	7.05058	-0.00322378
'MAPK11'	'04010: MAPK signaling pathway, 04370: VEGF signaling pathway, 04620: Toll-like receptor signaling pathway, 04664: Fc epsilon RI signaling pathway, 04670: Leukocyte transendothelial migration, 04912: GnRH signaling pathway, 05120: Epithelial cell signaling in Helicobacter pylori infection'	0.208132	7.05765	7.05314	-0.00450701
'MAPK12'	'04010: MAPK signaling pathway, 04370: VEGF signaling pathway, 04620: Toll-like receptor signaling pathway, 04664: Fc epsilon RI signaling pathway, 04670: Leukocyte transendothelial migration, 04912: GnRH signaling pathway, 05120: Epithelial cell signaling in Helicobacter pylori infection'	0.383524	7.04291	7.03683	-0.00607375
'MAPK13'	'04010: MAPK signaling pathway, 04370: VEGF signaling pathway, 04620: Toll-like receptor signaling pathway, 04664: Fc epsilon RI signaling pathway, 04670: Leukocyte transendothelial migration, 04912: GnRH signaling pathway, 05120: Epithelial cell signaling in Helicobacter pylori infection'	0.497916	6.92274	6.93015	0.0074119
'MAPK14'	'04010: MAPK signaling pathway, 04370: VEGF signaling pathway, 04620: Toll-like receptor signaling pathway, 04664: Fc epsilon RI signaling pathway, 04670: Leukocyte transendothelial migration, 04912: GnRH signaling pathway, 05120: Epithelial cell signaling in Helicobacter pylori infection'	0.00139729	7.09446	7.08553	-0.00893138
'MAPK3'	'04010: MAPK signaling pathway, 04150: mTOR signaling pathway, 04320: Dorso-ventral axis formation, 04350: TGF-beta signaling pathway, 04360: Axon guidance, 04370: VEGF signaling pathway, 04510: Focal adhesion, 04520: Adherens junction, 04540: Gap junction, 04650: Natural killer cell mediated cytotoxicity, 04664: Fc epsilon RI signaling pathway, 04720: Long-term potentiation, 04730: Long-term dep…	0.035917	7.01326	7.02647	0.0132119
'MAPK7'	'04010: MAPK signaling pathway, 04540: Gap junction, 04912: GnRH signaling pathway'	0.00738835	7.00037	7.00974	0.00937921
'MAPK8'	'04010: MAPK signaling pathway, 04310: Wnt signaling pathway, 04510: Focal adhesion, 04620: Toll-like receptor signaling pathway, 04664: Fc epsilon RI signaling pathway, 04910: Insulin signaling pathway, 04912: GnRH signaling pathway, 04920: Adipocytokine signaling pathway, 04930: Type II diabetes mellitus, 05120: Epithelial cell signaling in Helicobacter pylori infection, 05210: Colorectal cance…	0.185746	7.10252	7.10817	0.00565826
'MAPK8IP1'	'04010: MAPK signaling pathway'	0.208132	7.06467	7.06185	-0.00282332
'MAPK8IP2'	'04010: MAPK signaling pathway'	0.208132	7.03066	7.03313	0.00247257
'MAPK8IP3'	'04010: MAPK signaling pathway'	0.457892	7.05188	7.05012	-0.0017609
'MAPK9'	'04010: MAPK signaling pathway, 04310: Wnt signaling pathway, 04510: Focal adhesion, 04620: Toll-like receptor signaling pathway, 04664: Fc epsilon RI signaling pathway, 04910: Insulin signaling pathway, 04912: GnRH signaling pathway, 04920: Adipocytokine signaling pathway, 04930: Type II diabetes mellitus, 05120: Epithelial cell signaling in Helicobacter pylori infection, 05210: Colorectal cance…	0.008942	6.99795	7.00943	0.011481
'MAPKAPK2'	'04010: MAPK signaling pathway, 04370: VEGF signaling pathway'	0.0129492	7.00577	6.99099	-0.0147775
'MAPKAPK3'	'04010: MAPK signaling pathway, 04370: VEGF signaling pathway'	0.539729	6.96725	6.96641	-0.000846576
'MAPKAPK5'	'04010: MAPK signaling pathway'	0.871799	7.04606	7.04644	0.00038193
'MAPT'	'01510: Neurodegenerative Disorders, 04010: MAPK signaling pathway, 05010: Alzheimer''s disease'	0.628299	7.07421	7.07657	0.0023674
'MARS'	'00271: Methionine metabolism, 00450: Selenoamino acid metabolism, 00970: Aminoacyl-tRNA biosynthesis'	0.00738835	6.97327	6.95533	-0.0179454
'MASP1'	'04610: Complement and coagulation cascades'	0.771454	7.03975	7.0411	0.00135605
'MASP2'	'04610: Complement and coagulation cascades'	0.146399	7.04208	7.03789	-0.0041842
'MAT2A'	'00271: Methionine metabolism, 00450: Selenoamino acid metabolism'	0.821261	6.94328	6.94189	-0.00138432
'MAT2B'	'00271: Methionine metabolism, 00450: Selenoamino acid metabolism'	0.035917	6.96185	6.97656	0.0147087
'MAX'	'04010: MAPK signaling pathway'	0.165192	7.18755	7.19117	0.0036256
'MBL2'	'04610: Complement and coagulation cascades'	0.232412	7.04598	7.03646	-0.00951805
'MC1R'	'04080: Neuroactive ligand-receptor interaction, 04916: Melanogenesis'	0.113771	7.0154	7.02153	0.00613255
'MC2R'	'04080: Neuroactive ligand-receptor interaction'	0.871799	7.03746	7.03546	-0.0019966
'MC3R'	'04080: Neuroactive ligand-receptor interaction'	0.722572	7.03966	7.03756	-0.0020992
'MC4R'	'04080: Neuroactive ligand-receptor interaction'	0.419741	7.03898	7.03562	-0.00336083
'MC5R'	'04080: Neuroactive ligand-receptor interaction'	0.58323	7.04203	7.03879	-0.00324084
'MCAT'	'00061: Fatty acid biosynthesis'	0.821261	7.0396	7.03889	-0.000708068
'MCCC1'	'00280: Valine, leucine and isoleucine degradation'	0.974253	7.02361	7.02633	0.00272508
'MCCC2'	'00280: Valine, leucine and isoleucine degradation'	0.00331391	7.05853	7.06976	0.0112275
'MCHR1'	'04080: Neuroactive ligand-receptor interaction'	0.165192	7.04425	7.0396	-0.00465223
'MCHR2'	'04080: Neuroactive ligand-receptor interaction'	0.258636	7.04457	7.04152	-0.0030506
'MCM2'	'04110: Cell cycle'	0.286844	6.98388	6.95696	-0.026921
'MCM3'	'04110: Cell cycle'	0.674797	6.96024	6.94667	-0.013577
'MCM4'	'04110: Cell cycle'	0.317059	7.1118	7.10859	-0.00320881
'MCM5'	'04110: Cell cycle'	0.58323	7.03271	7.03379	0.00108128
'MCM6'	'04110: Cell cycle'	0.0997601	7.02993	7.01677	-0.0131585
'MCM7'	'04110: Cell cycle'	0.722572	6.97911	6.9688	-0.0103111
'MDH1'	'00020: Citrate cycle (TCA cycle), 00620: Pyruvate metabolism, 00630: Glyoxylate and dicarboxylate metabolism, 00710: Carbon fixation, 00720: Reductive carboxylate cycle (CO2 fixation)'	0.0129492	7.03632	7.04405	0.00772718
'MDH2'	'00020: Citrate cycle (TCA cycle), 00620: Pyruvate metabolism, 00630: Glyoxylate and dicarboxylate metabolism, 00710: Carbon fixation, 00720: Reductive carboxylate cycle (CO2 fixation)'	0.258636	6.917	6.92416	0.00716053
'MDM2'	'04110: Cell cycle, 05214: Glioma, 05218: Melanoma, 05220: Chronic myeloid leukemia'	0.539729	7.10816	7.1061	-0.00205998
'ME2'	'00620: Pyruvate metabolism'	0.056882	6.99645	7.00501	0.00856165
'MECR'	'00062: Fatty acid elongation in mitochondria'	0.821261	7.0014	7.00442	0.00301696
'MEF2C'	'04010: MAPK signaling pathway'	0.317059	7.04818	7.0519	0.00371356
'MET'	'04060: Cytokine-cytokine receptor interaction, 04360: Axon guidance, 04510: Focal adhesion, 04520: Adherens junction, 05120: Epithelial cell signaling in Helicobacter pylori infection, 05210: Colorectal cancer, 05218: Melanoma'	0.000886374	7.04545	7.02353	-0.0219167
'METTL2B'	'00150: Androgen and estrogen metabolism, 00340: Histidine metabolism, 00350: Tyrosine metabolism, 00380: Tryptophan metabolism, 00440: Aminophosphonate metabolism, 00450: Selenoamino acid metabolism, 00626: Nitrobenzene degradation'	0.286844	7.01106	7.01411	0.00305585
'MFNG'	'04330: Notch signaling pathway'	0.722572	7.0212	7.02391	0.00271313
'MGAT1'	'00510: N-Glycan biosynthesis, 01030: Glycan structures - biosynthesis 1'	0.208132	6.99107	6.99571	0.00464066
'MGAT3'	'00510: N-Glycan biosynthesis, 01030: Glycan structures - biosynthesis 1'	0.771454	7.04174	7.04027	-0.00146254
'MGAT4B'	'00510: N-Glycan biosynthesis, 01030: Glycan structures - biosynthesis 1'	0.035917	6.86276	6.89069	0.0279368
'MGST3'	'00480: Glutathione metabolism, 00980: Metabolism of xenobiotics by cytochrome P450'	0.539729	6.99938	7.00419	0.0048162
'MIB1'	'00380: Tryptophan metabolism'	0.419741	7.08952	7.0876	-0.00192387
'MICA'	'04650: Natural killer cell mediated cytotoxicity'	0.0129492	6.99274	7.00571	0.0129682
'MICB'	'04650: Natural killer cell mediated cytotoxicity'	0.165192	6.99897	6.99172	-0.00725226
'MIF'	'00350: Tyrosine metabolism, 00360: Phenylalanine metabolism'	0.871799	6.92051	6.92252	0.00200745
'MINPP1'	'00562: Inositol phosphate metabolism'	0.722572	6.94008	6.93975	-0.0003281
'MITF'	'04916: Melanogenesis, 05218: Melanoma'	0.722572	7.04261	7.04342	0.00080302
'MKNK1'	'04010: MAPK signaling pathway, 04910: Insulin signaling pathway'	0.0305861	7.01683	7.02809	0.0112532
'MKNK2'	'04010: MAPK signaling pathway, 04910: Insulin signaling pathway'	0.087161	6.89009	6.90405	0.0139596
'MLH1'	'05210: Colorectal cancer'	0.539729	7.08615	7.08807	0.00192304
'MLLT4'	'04520: Adherens junction, 04530: Tight junction, 04670: Leukocyte transendothelial migration'	0.58323	7.06206	7.06199	-7.1559e-05
'MLN'	'04080: Neuroactive ligand-receptor interaction'	0.539729	7.02509	7.02793	0.00283979
'MLNR'	'04080: Neuroactive ligand-receptor interaction'	0.922866	7.04157	7.04241	0.000832506
'MMAB'	'00860: Porphyrin and chlorophyll metabolism'	0.722572	7.09303	7.09382	0.000794652
'MME'	'04640: Hematopoietic cell lineage, 05010: Alzheimer''s disease'	0.00498637	7.05256	7.03587	-0.0166988
'MMP1'	'03320: PPAR signaling pathway'	0.008942	7.02463	6.88642	-0.138207
'MMP14'	'04912: GnRH signaling pathway'	0.00111506	7.04182	7.00354	-0.0382824
'MMP2'	'04670: Leukocyte transendothelial migration, 04912: GnRH signaling pathway'	0.286844	7.05091	7.05268	0.00177322
'MMP7'	'04310: Wnt signaling pathway'	0.00268598	7.03205	6.98577	-0.046281
'MMP9'	'04670: Leukocyte transendothelial migration'	0.00331391	7.00597	6.96018	-0.0457834
'MOS'	'04010: MAPK signaling pathway, 04810: Regulation of actin cytoskeleton'	0.974253	7.02739	7.02706	-0.000326163
'MPDZ'	'04530: Tight junction'	0.0184697	7.0397	7.0294	-0.0102938
'MPL'	'04060: Cytokine-cytokine receptor interaction, 04630: Jak-STAT signaling pathway'	0.922866	7.04847	7.04808	-0.000387336
'MPO'	'00360: Phenylalanine metabolism, 00680: Methane metabolism, 00940: Stilbene, coumarine and lignin biosynthesis'	0.674797	7.06958	7.06786	-0.001727
'MPP5'	'04530: Tight junction'	0.185746	7.00684	7.01711	0.0102717
'MPZL1'	'04514: Cell adhesion molecules (CAMs)'	0.165192	6.9832	6.97823	-0.00496961
'MRAS'	'04010: MAPK signaling pathway, 04530: Tight junction, 04810: Regulation of actin cytoskeleton'	0.628299	7.03192	7.02958	-0.00233429
'MRPL13'	'03010: Ribosome'	0.974253	6.98729	6.98438	-0.00290839
'MS4A1'	'04640: Hematopoietic cell lineage'	0.922866	7.01689	7.01326	-0.0036284
'MS4A2'	'04664: Fc epsilon RI signaling pathway'	0.165192	7.04898	7.0618	0.0128267
'MSH2'	'05210: Colorectal cancer'	0.539729	7.18158	7.17824	-0.00333893
'MSH3'	'05210: Colorectal cancer'	0.0489799	7.01646	7.02087	0.00440919
'MSH6'	'05210: Colorectal cancer'	0.58323	7.15742	7.15672	-0.000706798
'MSN'	'04670: Leukocyte transendothelial migration, 04810: Regulation of actin cytoskeleton'	0.871799	7.09112	7.09037	-0.000748507
'MTAP'	'00271: Methionine metabolism'	0.0259496	7.02577	7.02221	-0.00355718
'MTHFD1'	'00630: Glyoxylate and dicarboxylate metabolism, 00670: One carbon pool by folate'	0.0658171	7.03524	7.02903	-0.00621115
'MTHFD2'	'00630: Glyoxylate and dicarboxylate metabolism, 00670: One carbon pool by folate'	0.0154943	6.94756	6.89927	-0.0482844
'MTMR2'	'00051: Fructose and mannose metabolism, 00530: Aminosugars metabolism, 00730: Thiamine metabolism, 00740: Riboflavin metabolism, 00760: Nicotinate and nicotinamide metabolism'	0.771454	6.99686	6.99647	-0.000395311
'MTNR1A'	'04080: Neuroactive ligand-receptor interaction'	0.539729	7.056	7.0543	-0.00170394
'MTNR1B'	'04080: Neuroactive ligand-receptor interaction'	0.129287	7.0586	7.05407	-0.00453086
'MUT'	'00280: Valine, leucine and isoleucine degradation, 00640: Propanoate metabolism'	0.00407286	6.99695	7.01193	0.0149818
'MVD'	'00100: Biosynthesis of steroids'	0.185746	7.02355	7.01868	-0.00487096
'MYC'	'04010: MAPK signaling pathway, 04310: Wnt signaling pathway, 04350: TGF-beta signaling pathway, 04630: Jak-STAT signaling pathway, 05210: Colorectal cancer, 05216: Thyroid cancer, 05220: Chronic myeloid leukemia'	0.258636	7.26291	7.26095	-0.00195342
'MYD88'	'04210: Apoptosis, 04620: Toll-like receptor signaling pathway'	0.0154943	6.9211	6.93533	0.0142268
'MYH10'	'04530: Tight junction, 04810: Regulation of actin cytoskeleton'	0.0305861	7.05077	7.0457	-0.00507336
'MYH14'	'04530: Tight junction, 04810: Regulation of actin cytoskeleton'	0.232412	6.9919	6.99758	0.00568718
'MYH9'	'04530: Tight junction, 04810: Regulation of actin cytoskeleton'	0.00407286	7.27745	7.29056	0.0131114
'MYL3'	'04810: Regulation of actin cytoskeleton'	0.383524	7.07469	7.07134	-0.00334534
'MYL6'	'04510: Focal adhesion, 04530: Tight junction, 04670: Leukocyte transendothelial migration'	0.00268598	6.9702	6.98943	0.0192295
'MYLIP'	'00380: Tryptophan metabolism'	0.087161	6.95202	6.96779	0.0157725
'MYLK'	'04020: Calcium signaling pathway, 04510: Focal adhesion, 04810: Regulation of actin cytoskeleton'	0.419741	7.04659	7.04907	0.00247695
'MYLK2'	'04020: Calcium signaling pathway, 04510: Focal adhesion, 04810: Regulation of actin cytoskeleton'	0.628299	7.09915	7.09798	-0.00117136
'MYST3'	'00280: Valine, leucine and isoleucine degradation, 00350: Tyrosine metabolism, 00360: Phenylalanine metabolism, 00564: Glycerophospholipid metabolism, 00624: 1- and 2-Methylnaphthalene degradation, 00632: Benzoate degradation via CoA ligation, 00642: Ethylbenzene degradation, 00903: Limonene and pinene degradation, 00960: Alkaloid biosynthesis II'	0.113771	7.02263	7.02744	0.00480976
'MYST4'	'00280: Valine, leucine and isoleucine degradation, 00350: Tyrosine metabolism, 00360: Phenylalanine metabolism, 00564: Glycerophospholipid metabolism, 00624: 1- and 2-Methylnaphthalene degradation, 00632: Benzoate degradation via CoA ligation, 00642: Ethylbenzene degradation, 00903: Limonene and pinene degradation, 00960: Alkaloid biosynthesis II'	0.457892	6.99158	6.99685	0.00527046
'NADK'	'00760: Nicotinate and nicotinamide metabolism'	0.00608134	6.90665	6.92422	0.0175761
'NAGK'	'00251: Glutamate metabolism, 00530: Aminosugars metabolism'	0.628299	6.95992	6.9626	0.00267959
'NANS'	'00530: Aminosugars metabolism'	0.056882	7.04064	7.04935	0.00870853
'NCAM1'	'04514: Cell adhesion molecules (CAMs)'	0.821261	7.05074	7.04812	-0.00262041
'NCAM2'	'04514: Cell adhesion molecules (CAMs)'	0.232412	7.04084	7.03652	-0.00431621
'NCF2'	'04670: Leukocyte transendothelial migration'	0.0184697	7.02159	7.00978	-0.0118084
'NCF4'	'04670: Leukocyte transendothelial migration'	0.286844	6.99951	6.99848	-0.00102181
'NCK1'	'04360: Axon guidance, 04660: T cell receptor signaling pathway, 05130: Pathogenic Escherichia coli infection - EHEC, 05131: Pathogenic Escherichia coli infection - EPEC'	0.457892	7.08611	7.08751	0.00139945
'NCK2'	'04360: Axon guidance, 04660: T cell receptor signaling pathway, 05130: Pathogenic Escherichia coli infection - EHEC, 05131: Pathogenic Escherichia coli infection - EPEC'	0.674797	7.05051	7.05426	0.00375551
'NCKAP1'	'04810: Regulation of actin cytoskeleton'	0.771454	7.01981	7.0184	-0.00140311
'NCL'	'05130: Pathogenic Escherichia coli infection - EHEC, 05131: Pathogenic Escherichia coli infection - EPEC'	0.821261	7.08748	7.0884	0.000919993
'NCOA4'	'05216: Thyroid cancer'	0.00738835	6.8327	6.85951	0.0268052
'NCOR1'	'05040: Huntington''s disease'	0.008942	7.23112	7.24133	0.0102122
'NCOR2'	'04330: Notch signaling pathway'	0.674797	7.25031	7.25193	0.00161243
'NCR1'	'04650: Natural killer cell mediated cytotoxicity'	0.974253	7.03992	7.03969	-0.000229793
'NCR2'	'04650: Natural killer cell mediated cytotoxicity'	0.771454	7.028	7.03309	0.00509077
'NCR3'	'04650: Natural killer cell mediated cytotoxicity'	0.165192	7.04395	7.03745	-0.00649765
'NCSTN'	'04330: Notch signaling pathway, 05010: Alzheimer''s disease'	0.165192	7.03305	7.04421	0.011155
'NDUFA1'	'00190: Oxidative phosphorylation'	0.0758785	6.88026	6.90143	0.0211714
'NDUFA10'	'00190: Oxidative phosphorylation'	0.922866	7.06338	7.06506	0.001679
'NDUFA11'	'00190: Oxidative phosphorylation'	0.349288	6.95163	6.95875	0.0071159
'NDUFA12'	'00130: Ubiquinone biosynthesis, 00190: Oxidative phosphorylation'	0.165192	6.90941	6.92123	0.0118235
'NDUFA13'	'00130: Ubiquinone biosynthesis, 00190: Oxidative phosphorylation'	0.129287	6.92235	6.93369	0.0113417
'NDUFA2'	'00190: Oxidative phosphorylation'	0.974253	7.06227	7.06979	0.00751877
'NDUFA3'	'00190: Oxidative phosphorylation'	0.0758785	6.93888	6.95567	0.0167901
'NDUFA4'	'00190: Oxidative phosphorylation'	0.258636	6.92376	6.93347	0.0097141
'NDUFA4L2'	'00190: Oxidative phosphorylation'	0.00738835	7.03034	7.00882	-0.021518
'NDUFA5'	'00190: Oxidative phosphorylation'	0.00111506	7.01072	7.03171	0.0209862
'NDUFA6'	'00190: Oxidative phosphorylation'	0.0107811	6.95549	6.97206	0.0165722
'NDUFA7'	'00190: Oxidative phosphorylation'	0.628299	7.05443	7.05402	-0.000409984
'NDUFA8'	'00190: Oxidative phosphorylation'	0.58323	6.96931	6.97166	0.00235096
'NDUFA9'	'00190: Oxidative phosphorylation'	0.0305861	7.04749	7.06575	0.0182667
'NDUFAB1'	'00190: Oxidative phosphorylation'	0.146399	6.89796	6.91464	0.016679
'NDUFB1'	'00190: Oxidative phosphorylation'	0.000553547	6.96952	6.98693	0.0174063
'NDUFB10'	'00190: Oxidative phosphorylation'	0.317059	6.95144	6.95828	0.00683685
'NDUFB11'	'00130: Ubiquinone biosynthesis, 00190: Oxidative phosphorylation'	0.232412	6.94431	6.95189	0.00757574
'NDUFB2'	'00190: Oxidative phosphorylation'	0.232412	6.98473	6.98822	0.00348341
'NDUFB3'	'00190: Oxidative phosphorylation'	0.0658171	6.94515	6.95872	0.0135659
'NDUFB4'	'00190: Oxidative phosphorylation'	0.00331391	6.99201	7.00828	0.016267
'NDUFB5'	'00190: Oxidative phosphorylation'	0.0305861	6.9184	6.93229	0.0138945
'NDUFB6'	'00190: Oxidative phosphorylation'	0.674797	7.04143	7.0423	0.00086641
'NDUFB7'	'00190: Oxidative phosphorylation'	0.00331391	7.03099	7.04238	0.0113895
'NDUFB8'	'00190: Oxidative phosphorylation'	0.0305861	6.92701	6.94263	0.0156223
'NDUFB9'	'00190: Oxidative phosphorylation'	0.0758785	6.89656	6.91429	0.0177327
'NDUFC1'	'00190: Oxidative phosphorylation'	0.00139729	6.98997	7.00799	0.0180202
'NDUFC2'	'00190: Oxidative phosphorylation'	0.0489799	6.95687	6.96477	0.0079018
'NDUFS1'	'00190: Oxidative phosphorylation'	0.056882	7.06963	7.07833	0.00869964
'NDUFS2'	'00190: Oxidative phosphorylation'	0.0420206	7.02422	7.0361	0.0118793
'NDUFS3'	'00190: Oxidative phosphorylation'	0.286844	7.08923	7.08719	-0.00204779
'NDUFS4'	'00190: Oxidative phosphorylation'	0.00216862	7.0246	7.03388	0.0092753
'NDUFS5'	'00190: Oxidative phosphorylation'	0.286844	6.91471	6.92703	0.0123245
'NDUFS6'	'00190: Oxidative phosphorylation'	0.383524	6.96838	6.96992	0.00154279
'NDUFS7'	'00190: Oxidative phosphorylation'	0.0154943	7.03177	7.03898	0.00721456
'NDUFS8'	'00190: Oxidative phosphorylation'	0.0420206	7.05253	7.06514	0.0126101
'NDUFV1'	'00190: Oxidative phosphorylation'	0.056882	7.07462	7.08131	0.00668621
'NDUFV2'	'00190: Oxidative phosphorylation'	0.208132	7.0607	7.06594	0.00523671
'NDUFV3'	'00190: Oxidative phosphorylation'	0.00331391	7.01518	7.02491	0.00973597
'NEDD4'	'04120: Ubiquitin mediated proteolysis'	0.0305861	7.07896	7.07282	-0.0061452
'NEDD4L'	'04120: Ubiquitin mediated proteolysis'	0.0758785	7.01939	7.0345	0.0151142
'NEFH'	'01510: Neurodegenerative Disorders, 05030: Amyotrophic lateral sclerosis (ALS)'	0.922866	7.0421	7.0402	-0.00189807
'NEFL'	'05030: Amyotrophic lateral sclerosis (ALS)'	0.58323	7.06131	7.05812	-0.00318081
'NEFM'	'05030: Amyotrophic lateral sclerosis (ALS)'	0.58323	7.11641	7.11593	-0.000481749
'NEO1'	'04514: Cell adhesion molecules (CAMs)'	0.035917	6.91926	6.93227	0.0130112
'NES'	'01430: Cell Communication'	0.0259496	7.02295	7.01363	-0.00932876
'NEU1'	'00511: N-Glycan degradation, 00600: Sphingolipid metabolism, 01032: Glycan structures - degradation'	0.457892	6.96012	6.95459	-0.00552975
'NEUROD1'	'04950: Maturity onset diabetes of the young'	0.0259496	7.02319	7.03956	0.0163732
'NEUROG3'	'04950: Maturity onset diabetes of the young'	0.457892	7.03851	7.03572	-0.00278909
'NF1'	'04010: MAPK signaling pathway'	0.974253	7.13967	7.13698	-0.00269055
'NFATC1'	'04310: Wnt signaling pathway, 04360: Axon guidance, 04370: VEGF signaling pathway, 04650: Natural killer cell mediated cytotoxicity, 04660: T cell receptor signaling pathway, 04662: B cell receptor signaling pathway'	0.0489799	7.0407	7.04609	0.005382
'NFATC2'	'04010: MAPK signaling pathway, 04310: Wnt signaling pathway, 04360: Axon guidance, 04370: VEGF signaling pathway, 04650: Natural killer cell mediated cytotoxicity, 04660: T cell receptor signaling pathway, 04662: B cell receptor signaling pathway'	0.146399	7.06905	7.06486	-0.00418298
'NFATC3'	'04310: Wnt signaling pathway, 04360: Axon guidance, 04370: VEGF signaling pathway, 04650: Natural killer cell mediated cytotoxicity, 04660: T cell receptor signaling pathway, 04662: B cell receptor signaling pathway'	0.922866	7.00335	6.99997	-0.00337742
'NFATC4'	'04010: MAPK signaling pathway, 04310: Wnt signaling pathway, 04360: Axon guidance, 04370: VEGF signaling pathway, 04650: Natural killer cell mediated cytotoxicity, 04660: T cell receptor signaling pathway, 04662: B cell receptor signaling pathway'	0.674797	7.02721	7.02902	0.00180407
'NFE2L2'	'05060: Prion disease'	0.0658171	7.00478	7.0134	0.00862046
'NFKB1'	'04010: MAPK signaling pathway, 04210: Apoptosis, 04620: Toll-like receptor signaling pathway, 04660: T cell receptor signaling pathway, 04662: B cell receptor signaling pathway, 04920: Adipocytokine signaling pathway, 05120: Epithelial cell signaling in Helicobacter pylori infection, 05212: Pancreatic cancer, 05220: Chronic myeloid leukemia'	0.208132	7.10348	7.10833	0.0048532
'NFKB2'	'04010: MAPK signaling pathway, 04210: Apoptosis, 04620: Toll-like receptor signaling pathway, 04660: T cell receptor signaling pathway, 04662: B cell receptor signaling pathway, 04920: Adipocytokine signaling pathway, 05120: Epithelial cell signaling in Helicobacter pylori infection, 05212: Pancreatic cancer, 05220: Chronic myeloid leukemia'	0.056882	7.09176	7.08404	-0.00772168
'NFKBIA'	'04210: Apoptosis, 04620: Toll-like receptor signaling pathway, 04660: T cell receptor signaling pathway, 04662: B cell receptor signaling pathway, 04920: Adipocytokine signaling pathway, 05120: Epithelial cell signaling in Helicobacter pylori infection, 05220: Chronic myeloid leukemia'	0.821261	7.07833	7.07954	0.00120674
'NFKBIB'	'04660: T cell receptor signaling pathway, 04662: B cell receptor signaling pathway, 04920: Adipocytokine signaling pathway'	0.722572	7.03985	7.03766	-0.00218997
'NFKBIE'	'04660: T cell receptor signaling pathway, 04662: B cell receptor signaling pathway, 04920: Adipocytokine signaling pathway'	0.00407286	7.01069	6.99142	-0.019276
'NFX1'	'00380: Tryptophan metabolism'	0.821261	7.01094	7.00634	-0.00460188
'NFYA'	'04612: Antigen processing and presentation'	0.035917	7.017	7.01163	-0.00537462
'NFYB'	'04612: Antigen processing and presentation'	0.146399	7.01498	7.0103	-0.00467257
'NFYC'	'04612: Antigen processing and presentation'	0.0184697	7.01689	7.02127	0.00437735
'NGEF'	'04360: Axon guidance'	0.00738835	6.99382	7.01026	0.0164391
'NGFR'	'01510: Neurodegenerative Disorders, 04060: Cytokine-cytokine receptor interaction'	0.185746	7.08119	7.07603	-0.0051619
'NKD1'	'04310: Wnt signaling pathway'	0.0107811	7.03988	7.03336	-0.00652136
'NKD2'	'04310: Wnt signaling pathway'	0.0658171	7.0163	7.00856	-0.0077342
'NKX2-2'	'04950: Maturity onset diabetes of the young'	0.317059	7.07256	7.06647	-0.00608491
'NKX6-1'	'04950: Maturity onset diabetes of the young'	0.922866	7.04455	7.0436	-0.000947921
'NLGN1'	'04514: Cell adhesion molecules (CAMs)'	0.419741	7.04457	7.04168	-0.00289017
'NLGN2'	'04514: Cell adhesion molecules (CAMs)'	0.258636	6.99846	7.00313	0.00467348
'NLGN3'	'04514: Cell adhesion molecules (CAMs)'	0.974253	7.04025	7.0408	0.000552441
'NLK'	'04010: MAPK signaling pathway, 04310: Wnt signaling pathway, 04520: Adherens junction'	0.185746	7.01009	7.01468	0.00458444
'NMB'	'04080: Neuroactive ligand-receptor interaction'	0.00407286	7.01782	6.99652	-0.0212935
'NMBR'	'04080: Neuroactive ligand-receptor interaction'	0.628299	7.0405	7.0391	-0.00140529
'NME1'	'00230: Purine metabolism, 00240: Pyrimidine metabolism'	0.317059	7.02769	7.02787	0.000184149
'NME2'	'00230: Purine metabolism, 00240: Pyrimidine metabolism'	0.539729	6.87902	6.88452	0.00549578
'NME3'	'00230: Purine metabolism, 00240: Pyrimidine metabolism'	0.58323	6.97806	6.97934	0.00128194
'NME7'	'00230: Purine metabolism, 00240: Pyrimidine metabolism'	0.056882	7.00539	7.00109	-0.00430423
'NOD1'	'05120: Epithelial cell signaling in Helicobacter pylori infection'	0.821261	7.00552	7.00606	0.000536054
'NODAL'	'04350: TGF-beta signaling pathway'	0.871799	7.03406	7.03538	0.00132539
'NOG'	'04350: TGF-beta signaling pathway'	0.628299	7.04086	7.04068	-0.000171838
'NOS1'	'00330: Arginine and proline metabolism, 04020: Calcium signaling pathway, 04730: Long-term depression'	1	7.06143	7.06558	0.00415128
'NOS3'	'00330: Arginine and proline metabolism, 04020: Calcium signaling pathway, 04370: VEGF signaling pathway, 04730: Long-term depression'	0.00139729	7.063	7.04978	-0.0132154
'NOTCH1'	'04320: Dorso-ventral axis formation, 04330: Notch signaling pathway'	0.58323	7.06004	7.06024	0.000203303
'NOTCH2'	'04320: Dorso-ventral axis formation, 04330: Notch signaling pathway'	0.349288	6.97994	6.97695	-0.00298375
'NOTCH3'	'04320: Dorso-ventral axis formation, 04330: Notch signaling pathway'	0.821261	7.05637	7.05624	-0.000130749
'NOTCH4'	'04320: Dorso-ventral axis formation, 04330: Notch signaling pathway'	0.0184697	7.05243	7.04707	-0.00536946
'NOX1'	'04670: Leukocyte transendothelial migration'	1	6.93579	6.93527	-0.000523449
'NPAS2'	'04710: Circadian rhythm'	0.258636	7.02511	7.01872	-0.00639391
'NPFF'	'04080: Neuroactive ligand-receptor interaction'	0.457892	7.03261	7.03523	0.00262512
'NPFFR1'	'04080: Neuroactive ligand-receptor interaction'	0.035917	7.02034	7.03323	0.0128926
'NPFFR2'	'04080: Neuroactive ligand-receptor interaction'	0.974253	7.03909	7.03829	-0.000802273
'NPR1'	'00230: Purine metabolism, 04540: Gap junction, 04730: Long-term depression'	0.383524	7.11479	7.11141	-0.00337624
'NPY'	'04080: Neuroactive ligand-receptor interaction, 04920: Adipocytokine signaling pathway'	0.00498637	7.00271	7.02702	0.0243069
'NPY1R'	'04080: Neuroactive ligand-receptor interaction'	0.974253	7.01815	7.01806	-8.71162e-05
'NPY2R'	'04080: Neuroactive ligand-receptor interaction'	0.922866	7.04205	7.0443	0.00225435
'NPY5R'	'04080: Neuroactive ligand-receptor interaction'	0.821261	7.02645	7.02998	0.00353416
'NQO1'	'00100: Biosynthesis of steroids'	0.419741	6.90668	6.9148	0.00812488
'NR1D1'	'04710: Circadian rhythm'	0.185746	7.02618	7.01401	-0.0121666
'NR1H3'	'03320: PPAR signaling pathway'	0.00608134	6.96855	6.98468	0.0161305
'NR3C1'	'04080: Neuroactive ligand-receptor interaction'	0.035917	7.02804	7.03594	0.00789772
'NR4A1'	'04010: MAPK signaling pathway'	0.58323	7.03618	7.03526	-0.000927523
'NR4A2'	'01510: Neurodegenerative Disorders'	0.008942	7.02711	7.00911	-0.0180013
'NR5A2'	'04950: Maturity onset diabetes of the young'	0.0489799	6.99312	7.01384	0.0207212
'NRAS'	'04010: MAPK signaling pathway, 04360: Axon guidance, 04370: VEGF signaling pathway, 04530: Tight junction, 04540: Gap junction, 04650: Natural killer cell mediated cytotoxicity, 04660: T cell receptor signaling pathway, 04662: B cell receptor signaling pathway, 04664: Fc epsilon RI signaling pathway, 04720: Long-term potentiation, 04730: Long-term depression, 04810: Regulation of actin cytoskele…	1	6.97352	6.97393	0.000413341
'NRCAM'	'04514: Cell adhesion molecules (CAMs)'	0.457892	7.03954	7.03761	-0.00192946
'NRP1'	'04360: Axon guidance'	0.232412	7.04637	7.04314	-0.00323026
'NRXN1'	'04514: Cell adhesion molecules (CAMs)'	0.722572	7.04118	7.04056	-0.000624581
'NRXN2'	'04514: Cell adhesion molecules (CAMs)'	0.419741	7.04734	7.04335	-0.00399224
'NRXN3'	'04514: Cell adhesion molecules (CAMs)'	0.0997601	7.06005	7.0521	-0.0079477
'NSD1'	'00310: Lysine degradation'	0.628299	7.02747	7.02719	-0.000281381
'NT5C2'	'00230: Purine metabolism, 00240: Pyrimidine metabolism, 00760: Nicotinate and nicotinamide metabolism'	0.035917	7.01984	7.02689	0.00705215
'NT5E'	'00230: Purine metabolism, 00240: Pyrimidine metabolism, 00760: Nicotinate and nicotinamide metabolism'	1	7.00441	7.00527	0.00085663
'NTF3'	'04010: MAPK signaling pathway'	0.165192	7.02469	7.03007	0.00538798
'NTN1'	'04360: Axon guidance'	0.258636	7.04836	7.05128	0.00291243
'NTRK2'	'04010: MAPK signaling pathway'	0.628299	7.04811	7.04936	0.00124574
'NTS'	'04080: Neuroactive ligand-receptor interaction'	0.087161	7.04366	7.03571	-0.00795015
'NTSR1'	'04020: Calcium signaling pathway, 04080: Neuroactive ligand-receptor interaction'	0.317059	7.03315	7.03751	0.00435404
'NUMB'	'04330: Notch signaling pathway'	0.056882	7.03617	7.04031	0.00414425
'NUMBL'	'04330: Notch signaling pathway'	0.087161	7.01442	7.02138	0.00695702
'Ntrk1'	'04010: MAPK signaling pathway, 04210: Apoptosis, 05216: Thyroid cancer'	0.722572	7.03723	7.03938	0.00214975
'OAT'	'00330: Arginine and proline metabolism'	0.258636	6.95609	6.95989	0.003796
'OCLN'	'04514: Cell adhesion molecules (CAMs), 04530: Tight junction, 04670: Leukocyte transendothelial migration, 05130: Pathogenic Escherichia coli infection - EHEC, 05131: Pathogenic Escherichia coli infection - EPEC'	0.0107811	6.95068	6.95905	0.00836858
'OCRL'	'00562: Inositol phosphate metabolism, 04070: Phosphatidylinositol signaling system'	0.185746	6.97076	6.97423	0.00346776
'ODC1'	'00220: Urea cycle and metabolism of amino groups'	0.419741	6.89828	6.87485	-0.0234329
'OGDH'	'00020: Citrate cycle (TCA cycle), 00310: Lysine degradation, 00380: Tryptophan metabolism'	0.056882	7.01676	7.01185	-0.00490977
'OGT'	'00051: Fructose and mannose metabolism, 00561: Glycerolipid metabolism, 01031: Glycan structures - biosynthesis 2'	0.871799	6.97544	6.97127	-0.00417299
'ONECUT1'	'04950: Maturity onset diabetes of the young'	0.232412	7.05056	7.04867	-0.00189088
'OPRD1'	'04080: Neuroactive ligand-receptor interaction'	0.349288	7.06006	7.05548	-0.00457349
'OPRK1'	'04080: Neuroactive ligand-receptor interaction'	0.771454	7.0431	7.04447	0.00136855
'OPRL1'	'04080: Neuroactive ligand-receptor interaction'	0.497916	7.04137	7.03759	-0.00377704
'OPRM1'	'04080: Neuroactive ligand-receptor interaction'	0.0997601	7.05436	7.04965	-0.00471466
'OSM'	'04060: Cytokine-cytokine receptor interaction, 04630: Jak-STAT signaling pathway'	0.0420206	7.04799	7.03955	-0.00844167
'OSMR'	'04060: Cytokine-cytokine receptor interaction, 04630: Jak-STAT signaling pathway'	0.00608134	7.02632	7.01204	-0.0142777
'OTUB1'	'00310: Lysine degradation, 00780: Biotin metabolism'	0.0758785	6.93833	6.94762	0.00928638
'OTUB2'	'00310: Lysine degradation, 00780: Biotin metabolism'	0.0154943	7.03835	7.03281	-0.00553977
'OXA1L'	'03060: Protein export'	0.419741	6.91254	6.91413	0.00159221
'OXCT1'	'00072: Synthesis and degradation of ketone bodies, 00280: Valine, leucine and isoleucine degradation, 00650: Butanoate metabolism'	0.419741	7.08524	7.08025	-0.00499388
'OXT'	'04080: Neuroactive ligand-receptor interaction'	0.383524	7.04286	7.03775	-0.00510828
'OXTR'	'04020: Calcium signaling pathway, 04080: Neuroactive ligand-receptor interaction'	0.129287	7.02898	7.02498	-0.00400122
'P2RX1'	'04020: Calcium signaling pathway, 04080: Neuroactive ligand-receptor interaction'	0.165192	7.02673	7.03152	0.00479569
'P2RX2'	'04020: Calcium signaling pathway, 04080: Neuroactive ligand-receptor interaction'	0.974253	7.03922	7.04081	0.00159223
'P2RX3'	'04020: Calcium signaling pathway, 04080: Neuroactive ligand-receptor interaction'	0.419741	7.03426	7.0362	0.00193963
'P2RX4'	'04020: Calcium signaling pathway, 04080: Neuroactive ligand-receptor interaction'	0.00174413	6.90563	6.94354	0.0379096
'P2RX7'	'04020: Calcium signaling pathway, 04080: Neuroactive ligand-receptor interaction'	0.457892	7.0462	7.0452	-0.00100808
'P2RY1'	'04080: Neuroactive ligand-receptor interaction'	0.0154943	6.98719	7.01301	0.025817
'P2RY13'	'04080: Neuroactive ligand-receptor interaction'	0.821261	7.01575	7.01359	-0.00215875
'P2RY2'	'04080: Neuroactive ligand-receptor interaction'	0.497916	7.01959	7.02478	0.0051906
'PAFAH1B1'	'00565: Ether lipid metabolism'	0.771454	7.06496	7.06665	0.00169602
'PAFAH1B2'	'00565: Ether lipid metabolism'	1	7.014	7.01322	-0.000771817
'PAFAH1B3'	'00565: Ether lipid metabolism'	0.258636	6.99381	6.98915	-0.00466393
'PAH'	'00400: Phenylalanine, tyrosine and tryptophan biosynthesis'	0.317059	7.04347	7.03224	-0.0112231
'PAICS'	'00230: Purine metabolism'	0.258636	7.01744	7.01342	-0.00402441
'PAK1'	'04010: MAPK signaling pathway, 04360: Axon guidance, 04510: Focal adhesion, 04650: Natural killer cell mediated cytotoxicity, 04660: T cell receptor signaling pathway, 04810: Regulation of actin cytoskeleton, 05120: Epithelial cell signaling in Helicobacter pylori infection'	0.00139729	7.13373	7.14584	0.0121028
'PAK2'	'04010: MAPK signaling pathway, 04360: Axon guidance, 04510: Focal adhesion, 04660: T cell receptor signaling pathway, 04810: Regulation of actin cytoskeleton'	0.000265259	7.02715	7.01314	-0.0140187
'PAK3'	'04360: Axon guidance, 04510: Focal adhesion, 04660: T cell receptor signaling pathway, 04810: Regulation of actin cytoskeleton'	0.539729	7.04512	7.04135	-0.0037685
'PAK4'	'04360: Axon guidance, 04510: Focal adhesion, 04660: T cell receptor signaling pathway, 04810: Regulation of actin cytoskeleton'	0.0420206	7.12571	7.13515	0.00943751
'PAK6'	'04360: Axon guidance, 04510: Focal adhesion, 04660: T cell receptor signaling pathway, 04810: Regulation of actin cytoskeleton'	0.0259496	7.02988	7.02335	-0.00652686
'PAK7'	'04360: Axon guidance, 04510: Focal adhesion, 04660: T cell receptor signaling pathway, 04810: Regulation of actin cytoskeleton'	0.674797	7.04485	7.0419	-0.00295353
'PANK1'	'00770: Pantothenate and CoA biosynthesis'	0.087161	6.97918	6.99055	0.0113638
'PANK2'	'00770: Pantothenate and CoA biosynthesis'	0.232412	7.03865	7.03432	-0.00432956
'PAPSS2'	'00230: Purine metabolism, 00450: Selenoamino acid metabolism, 00920: Sulfur metabolism'	0.000701837	6.88252	6.91881	0.0362955
'PARD6A'	'04530: Tight junction'	0.457892	7.05775	7.0566	-0.00115118
'PARD6B'	'04530: Tight junction'	0.165192	7.04697	7.04392	-0.00304776
'PARD6G'	'04530: Tight junction'	0.146399	7.04411	7.0365	-0.00760398
'PARK2'	'01510: Neurodegenerative Disorders, 05020: Parkinson''s disease'	0.821261	7.07856	7.08118	0.00262336
'PARK7'	'01510: Neurodegenerative Disorders, 05020: Parkinson''s disease'	0.457892	6.84858	6.85489	0.00630868
'PARS2'	'00330: Arginine and proline metabolism, 00970: Aminoacyl-tRNA biosynthesis'	0.0658171	7.04477	7.05073	0.00596523
'PARVA'	'04510: Focal adhesion'	0.232412	7.15496	7.15986	0.00490038
'PARVB'	'04510: Focal adhesion'	0.0489799	7.15771	7.14813	-0.00957865
'PARVG'	'04510: Focal adhesion'	0.539729	7.03146	7.0341	0.00264446
'PAX6'	'04950: Maturity onset diabetes of the young'	0.722572	7.04733	7.04696	-0.000375204
'PC'	'00020: Citrate cycle (TCA cycle), 00252: Alanine and aspartate metabolism, 00620: Pyruvate metabolism'	0.165192	7.04995	7.04543	-0.00452156
'PCCA'	'00280: Valine, leucine and isoleucine degradation, 00640: Propanoate metabolism'	0.722572	7.03725	7.03874	0.0014892
'PCCB'	'00280: Valine, leucine and isoleucine degradation, 00640: Propanoate metabolism'	0.087161	7.07253	7.08568	0.0131482
'PCK1'	'00020: Citrate cycle (TCA cycle), 00620: Pyruvate metabolism, 03320: PPAR signaling pathway, 04910: Insulin signaling pathway, 04920: Adipocytokine signaling pathway'	0.00216862	6.86483	6.91931	0.0544848
'PCK2'	'00020: Citrate cycle (TCA cycle), 00620: Pyruvate metabolism, 03320: PPAR signaling pathway, 04910: Insulin signaling pathway, 04920: Adipocytokine signaling pathway'	0.000701837	6.97606	6.99332	0.0172564
'PCNA'	'04110: Cell cycle'	0.922866	7.0141	7.01201	-0.00209163
'PCYT1A'	'00440: Aminophosphonate metabolism, 00564: Glycerophospholipid metabolism'	0.871799	7.0079	7.01032	0.00242561
'PCYT1B'	'00440: Aminophosphonate metabolism, 00564: Glycerophospholipid metabolism'	0.722572	7.02219	7.02104	-0.00115827
'PDC'	'04740: Olfactory transduction'	0.974253	7.03968	7.03812	-0.00155322
'PDCD1'	'04514: Cell adhesion molecules (CAMs), 04660: T cell receptor signaling pathway'	0.165192	7.06293	7.05809	-0.00484268
'PDCD1LG2'	'04514: Cell adhesion molecules (CAMs)'	0.0107811	7.04656	7.04133	-0.00522842
'PDE10A'	'00230: Purine metabolism'	0.208132	7.03943	7.03353	-0.00590414
'PDE1A'	'00230: Purine metabolism, 04020: Calcium signaling pathway, 04742: Taste transduction'	0.871799	7.03379	7.03661	0.00282464
'PDE1B'	'00230: Purine metabolism, 04020: Calcium signaling pathway'	0.821261	7.03358	7.03467	0.00108705
'PDE1C'	'00230: Purine metabolism, 04020: Calcium signaling pathway, 04740: Olfactory transduction'	0.674797	7.03799	7.03632	-0.00167047
'PDE3A'	'00230: Purine metabolism, 04910: Insulin signaling pathway'	0.232412	7.02219	7.02617	0.0039769
'PDE3B'	'00230: Purine metabolism, 04910: Insulin signaling pathway'	0.628299	7.01084	7.01281	0.00197593
'PDE4A'	'00230: Purine metabolism'	0.539729	7.04106	7.04075	-0.000305598
'PDE4B'	'00230: Purine metabolism'	0.0129492	7.07095	7.05495	-0.0160023
'PDE4D'	'00230: Purine metabolism'	0.722572	7.02945	7.02771	-0.00174322
'PDE5A'	'00230: Purine metabolism'	0.113771	7.02774	7.0316	0.00386838
'PDE6D'	'00230: Purine metabolism'	0.349288	6.99923	6.99728	-0.00194854
'PDE6G'	'00230: Purine metabolism'	0.771454	7.04765	7.04367	-0.0039806
'PDE6H'	'00230: Purine metabolism'	0.628299	7.03577	7.03034	-0.00542831
'PDGFB'	'04010: MAPK signaling pathway, 04060: Cytokine-cytokine receptor interaction, 04510: Focal adhesion, 04540: Gap junction, 04810: Regulation of actin cytoskeleton, 05214: Glioma, 05218: Melanoma'	0.0997601	7.07361	7.06584	-0.00777552
'PDGFC'	'04060: Cytokine-cytokine receptor interaction, 04510: Focal adhesion, 04540: Gap junction, 05218: Melanoma'	0.674797	7.02798	7.02518	-0.00279732
'PDGFD'	'04510: Focal adhesion, 04540: Gap junction, 05218: Melanoma'	0.0489799	7.01644	7.0306	0.0141582
'PDGFRA'	'04010: MAPK signaling pathway, 04020: Calcium signaling pathway, 04060: Cytokine-cytokine receptor interaction, 04510: Focal adhesion, 04540: Gap junction, 04810: Regulation of actin cytoskeleton, 05210: Colorectal cancer, 05214: Glioma, 05218: Melanoma'	0.129287	7.0635	7.06021	-0.00329216
'PDGFRB'	'04010: MAPK signaling pathway, 04020: Calcium signaling pathway, 04060: Cytokine-cytokine receptor interaction, 04510: Focal adhesion, 04540: Gap junction, 04810: Regulation of actin cytoskeleton, 05210: Colorectal cancer, 05214: Glioma, 05218: Melanoma'	0.00174413	7.06187	7.03779	-0.0240884
'PDHA1'	'00010: Glycolysis / Gluconeogenesis, 00252: Alanine and aspartate metabolism, 00290: Valine, leucine and isoleucine biosynthesis, 00620: Pyruvate metabolism, 00650: Butanoate metabolism'	0.232412	6.89448	6.90308	0.0086025
'PDHA2'	'00010: Glycolysis / Gluconeogenesis, 00252: Alanine and aspartate metabolism, 00290: Valine, leucine and isoleucine biosynthesis, 00620: Pyruvate metabolism, 00650: Butanoate metabolism'	0.539729	7.10477	7.1015	-0.00327149
'PDHB'	'00010: Glycolysis / Gluconeogenesis, 00252: Alanine and aspartate metabolism, 00290: Valine, leucine and isoleucine biosynthesis, 00620: Pyruvate metabolism, 00650: Butanoate metabolism'	0.286844	6.91801	6.92383	0.00581918
'PDHX'	'00010: Glycolysis / Gluconeogenesis, 00252: Alanine and aspartate metabolism, 00620: Pyruvate metabolism'	0.974253	6.94344	6.94444	0.00100444
'PDIA3'	'04612: Antigen processing and presentation'	0.674797	6.98878	6.9914	0.00262387
'PDIA4'	'05110: Cholera - Infection'	0.383524	6.92862	6.92465	-0.0039733
'PDK1'	'04660: T cell receptor signaling pathway, 04664: Fc epsilon RI signaling pathway'	0.258636	7.00757	7.01215	0.00458441
'PDPK1'	'03320: PPAR signaling pathway, 04150: mTOR signaling pathway, 04510: Focal adhesion, 04910: Insulin signaling pathway'	0.0997601	7.07703	7.08181	0.00478312
'PDX1'	'04930: Type II diabetes mellitus, 04950: Maturity onset diabetes of the young'	0.821261	7.09432	7.09233	-0.00199207
'PDXK'	'00750: Vitamin B6 metabolism'	0.286844	6.96398	6.95539	-0.00858963
'PDXP'	'00750: Vitamin B6 metabolism'	0.00268598	6.94623	6.96441	0.0181849
'PECAM1'	'04514: Cell adhesion molecules (CAMs), 04670: Leukocyte transendothelial migration'	0.000434878	7.01014	6.97461	-0.0355266
'PER1'	'04710: Circadian rhythm'	0.0758785	7.03207	7.03869	0.00662687
'PER2'	'04710: Circadian rhythm'	0.497916	7.03724	7.03761	0.000364435
'PER3'	'04710: Circadian rhythm'	0.0997601	7.03632	7.04519	0.00886561
'PF4'	'04060: Cytokine-cytokine receptor interaction, 04670: Leukocyte transendothelial migration'	0.0259496	7.03724	7.02515	-0.0120894
'PFAS'	'00230: Purine metabolism'	0.383524	7.00289	7.00472	0.00182995
'PFKFB2'	'00051: Fructose and mannose metabolism'	0.0420206	7.0052	7.01272	0.00751678
'PFKFB3'	'00051: Fructose and mannose metabolism'	0.0219336	6.99004	6.93364	-0.0564017
'PFKL'	'00010: Glycolysis / Gluconeogenesis, 00030: Pentose phosphate pathway, 00051: Fructose and mannose metabolism, 00052: Galactose metabolism, 04910: Insulin signaling pathway'	0.0305861	7.01357	7.02695	0.0133804
'PFKM'	'00010: Glycolysis / Gluconeogenesis, 00030: Pentose phosphate pathway, 00051: Fructose and mannose metabolism, 00052: Galactose metabolism, 04910: Insulin signaling pathway'	0.674797	7.10759	7.10838	0.000799557
'PFKP'	'00010: Glycolysis / Gluconeogenesis, 00030: Pentose phosphate pathway, 00051: Fructose and mannose metabolism, 00052: Galactose metabolism, 04910: Insulin signaling pathway'	0.286844	7.14154	7.13955	-0.00199207
'PFN1'	'04810: Regulation of actin cytoskeleton'	0.087161	6.8494	6.86774	0.0183461
'PFN2'	'04810: Regulation of actin cytoskeleton'	0.317059	6.92785	6.93615	0.00830204
'PGAM1'	'00010: Glycolysis / Gluconeogenesis'	0.317059	7.03469	7.03774	0.00305151
'PGAP1'	'00563: Glycosylphosphatidylinositol(GPI)-anchor biosynthesis'	0.0997601	7.01673	7.02406	0.0073358
'PGD'	'00030: Pentose phosphate pathway'	0.146399	7.16631	7.16219	-0.00412198
'PGF'	'04150: mTOR signaling pathway, 04510: Focal adhesion, 05212: Pancreatic cancer'	0.457892	6.99626	6.99917	0.00291102
'PGK1'	'00010: Glycolysis / Gluconeogenesis, 00710: Carbon fixation'	0.286844	7.04111	7.02344	-0.0176687
'PGM1'	'00010: Glycolysis / Gluconeogenesis, 00030: Pentose phosphate pathway, 00052: Galactose metabolism, 00500: Starch and sucrose metabolism, 00521: Streptomycin biosynthesis'	0.00331391	6.85169	6.87925	0.0275588
'PHGDH'	'00260: Glycine, serine and threonine metabolism'	0.00608134	7.19831	7.18585	-0.0124544
'PHKA1'	'04020: Calcium signaling pathway, 04910: Insulin signaling pathway'	0.208132	7.05601	7.04835	-0.00765994
'PHKA2'	'04020: Calcium signaling pathway, 04910: Insulin signaling pathway'	0.539729	7.02011	7.0198	-0.000305875
'PHKB'	'04020: Calcium signaling pathway, 04910: Insulin signaling pathway'	0.0219336	7.0017	7.01824	0.0165484
'PHKG1'	'04020: Calcium signaling pathway, 04910: Insulin signaling pathway'	0.58323	7.02899	7.02958	0.000587785
'PHKG2'	'04020: Calcium signaling pathway, 04910: Insulin signaling pathway'	0.349288	7.04545	7.04213	-0.0033178
'PIAS1'	'04630: Jak-STAT signaling pathway'	0.286844	7.06116	7.06756	0.00640353
'PIAS2'	'04630: Jak-STAT signaling pathway'	0.286844	7.05758	7.05805	0.000470514
'PIAS3'	'04630: Jak-STAT signaling pathway'	0.539729	7.02986	7.02912	-0.000740016
'PIAS4'	'04630: Jak-STAT signaling pathway'	0.922866	7.04167	7.0462	0.00452803
'PIGA'	'00563: Glycosylphosphatidylinositol(GPI)-anchor biosynthesis, 01031: Glycan structures - biosynthesis 2'	0.146399	7.03805	7.03456	-0.00348946
'PIGC'	'00563: Glycosylphosphatidylinositol(GPI)-anchor biosynthesis, 01031: Glycan structures - biosynthesis 2'	0.58323	6.97879	6.97652	-0.00226993
'PIGH'	'00563: Glycosylphosphatidylinositol(GPI)-anchor biosynthesis, 01031: Glycan structures - biosynthesis 2'	0.871799	7.00665	7.00683	0.000186285
'PIGK'	'00563: Glycosylphosphatidylinositol(GPI)-anchor biosynthesis, 01031: Glycan structures - biosynthesis 2'	0.974253	6.98536	6.98745	0.00208982
'PIGP'	'00563: Glycosylphosphatidylinositol(GPI)-anchor biosynthesis, 01031: Glycan structures - biosynthesis 2'	0.087161	6.97816	6.98769	0.00952933
'PIGQ'	'00563: Glycosylphosphatidylinositol(GPI)-anchor biosynthesis, 01031: Glycan structures - biosynthesis 2'	0.457892	7.02529	7.0238	-0.00148702
'PIGS'	'00563: Glycosylphosphatidylinositol(GPI)-anchor biosynthesis, 01031: Glycan structures - biosynthesis 2'	0.208132	7.00502	7.01558	0.0105567
'PIGT'	'00563: Glycosylphosphatidylinositol(GPI)-anchor biosynthesis, 01031: Glycan structures - biosynthesis 2'	0.383524	6.96583	6.96988	0.00405457
'PIGU'	'00563: Glycosylphosphatidylinositol(GPI)-anchor biosynthesis, 01031: Glycan structures - biosynthesis 2'	0.58323	7.0247	7.02501	0.000307485
'PIK3C2A'	'04070: Phosphatidylinositol signaling system'	0.58323	7.02624	7.02815	0.00191298
'PIK3C2B'	'04070: Phosphatidylinositol signaling system'	0.0305861	6.96356	6.9786	0.0150387
'PIK3C3'	'00562: Inositol phosphate metabolism, 04070: Phosphatidylinositol signaling system, 04140: Regulation of autophagy'	0.539729	7.0273	7.03053	0.00323801
'PIK3CA'	'00562: Inositol phosphate metabolism, 04070: Phosphatidylinositol signaling system, 04150: mTOR signaling pathway, 04210: Apoptosis, 04370: VEGF signaling pathway, 04510: Focal adhesion, 04620: Toll-like receptor signaling pathway, 04630: Jak-STAT signaling pathway, 04650: Natural killer cell mediated cytotoxicity, 04660: T cell receptor signaling pathway, 04662: B cell receptor signaling pathwa…	0.821261	7.14395	7.1406	-0.00335701
'PIK3CB'	'00562: Inositol phosphate metabolism, 04070: Phosphatidylinositol signaling system, 04150: mTOR signaling pathway, 04210: Apoptosis, 04370: VEGF signaling pathway, 04510: Focal adhesion, 04620: Toll-like receptor signaling pathway, 04630: Jak-STAT signaling pathway, 04650: Natural killer cell mediated cytotoxicity, 04660: T cell receptor signaling pathway, 04662: B cell receptor signaling pathwa…	0.419741	7.03762	7.04101	0.00339003
'PIK3CD'	'00562: Inositol phosphate metabolism, 04070: Phosphatidylinositol signaling system, 04150: mTOR signaling pathway, 04210: Apoptosis, 04370: VEGF signaling pathway, 04510: Focal adhesion, 04620: Toll-like receptor signaling pathway, 04630: Jak-STAT signaling pathway, 04650: Natural killer cell mediated cytotoxicity, 04660: T cell receptor signaling pathway, 04662: B cell receptor signaling pathwa…	0.722572	7.03443	7.03364	-0.000792389
'PIK3CG'	'00562: Inositol phosphate metabolism, 04070: Phosphatidylinositol signaling system, 04150: mTOR signaling pathway, 04210: Apoptosis, 04370: VEGF signaling pathway, 04510: Focal adhesion, 04620: Toll-like receptor signaling pathway, 04630: Jak-STAT signaling pathway, 04650: Natural killer cell mediated cytotoxicity, 04660: T cell receptor signaling pathway, 04662: B cell receptor signaling pathwa…	0.58323	7.07307	7.06921	-0.00386485
'PIK3R1'	'04070: Phosphatidylinositol signaling system, 04150: mTOR signaling pathway, 04210: Apoptosis, 04370: VEGF signaling pathway, 04510: Focal adhesion, 04620: Toll-like receptor signaling pathway, 04630: Jak-STAT signaling pathway, 04650: Natural killer cell mediated cytotoxicity, 04660: T cell receptor signaling pathway, 04662: B cell receptor signaling pathway, 04664: Fc epsilon RI signaling path…	0.0219336	7.17176	7.18555	0.0137876
'PIK3R2'	'04070: Phosphatidylinositol signaling system, 04150: mTOR signaling pathway, 04210: Apoptosis, 04370: VEGF signaling pathway, 04510: Focal adhesion, 04620: Toll-like receptor signaling pathway, 04630: Jak-STAT signaling pathway, 04650: Natural killer cell mediated cytotoxicity, 04660: T cell receptor signaling pathway, 04662: B cell receptor signaling pathway, 04664: Fc epsilon RI signaling path…	0.974253	7.05807	7.05635	-0.00171349
'PIK3R3'	'04070: Phosphatidylinositol signaling system, 04150: mTOR signaling pathway, 04210: Apoptosis, 04370: VEGF signaling pathway, 04510: Focal adhesion, 04620: Toll-like receptor signaling pathway, 04630: Jak-STAT signaling pathway, 04650: Natural killer cell mediated cytotoxicity, 04660: T cell receptor signaling pathway, 04662: B cell receptor signaling pathway, 04664: Fc epsilon RI signaling path…	0.0129492	7.07877	7.07003	-0.00874419
'PIK3R4'	'04140: Regulation of autophagy'	0.821261	7.16129	7.16104	-0.000247174
'PIK3R5'	'04070: Phosphatidylinositol signaling system, 04150: mTOR signaling pathway, 04210: Apoptosis, 04370: VEGF signaling pathway, 04510: Focal adhesion, 04620: Toll-like receptor signaling pathway, 04630: Jak-STAT signaling pathway, 04650: Natural killer cell mediated cytotoxicity, 04660: T cell receptor signaling pathway, 04662: B cell receptor signaling pathway, 04664: Fc epsilon RI signaling path…	0.419741	7.01822	7.01441	-0.00380917
'PIM1'	'04630: Jak-STAT signaling pathway'	0.0420206	6.99669	6.99121	-0.00548312
'PINK1'	'01510: Neurodegenerative Disorders, 05020: Parkinson''s disease'	0.0107811	6.93586	6.95132	0.0154599
'PIP5K1A'	'00562: Inositol phosphate metabolism, 04070: Phosphatidylinositol signaling system, 04810: Regulation of actin cytoskeleton'	0.035917	7.03422	7.02628	-0.00793834
'PIP5K1B'	'00562: Inositol phosphate metabolism, 04070: Phosphatidylinositol signaling system, 04810: Regulation of actin cytoskeleton'	0.419741	7.02211	7.02623	0.00412468
'PIP5K1C'	'00562: Inositol phosphate metabolism, 04070: Phosphatidylinositol signaling system, 04510: Focal adhesion, 04810: Regulation of actin cytoskeleton'	0.419741	6.97973	6.97346	-0.00627407
'PIPOX'	'00260: Glycine, serine and threonine metabolism, 00310: Lysine degradation'	0.974253	7.03208	7.0355	0.00342438
'PITX2'	'04350: TGF-beta signaling pathway'	0.0184697	7.1167	7.0986	-0.0181023
'PIWIL1'	'04320: Dorso-ventral axis formation'	0.258636	7.03521	7.03324	-0.00196882
'PIWIL2'	'04320: Dorso-ventral axis formation'	0.0129492	7.0021	7.02168	0.0195786
'PJA1'	'00380: Tryptophan metabolism'	0.035917	6.9777	6.96893	-0.00877064
'PKLR'	'00010: Glycolysis / Gluconeogenesis, 00230: Purine metabolism, 00620: Pyruvate metabolism, 00710: Carbon fixation, 04910: Insulin signaling pathway, 04930: Type II diabetes mellitus, 04950: Maturity onset diabetes of the young'	0.286844	7.04609	7.04195	-0.00414171
'PKM2'	'00010: Glycolysis / Gluconeogenesis, 00230: Purine metabolism, 00620: Pyruvate metabolism, 00710: Carbon fixation, 04910: Insulin signaling pathway, 04930: Type II diabetes mellitus'	0.539729	7.12438	7.12664	0.00225761
'PKMYT1'	'04110: Cell cycle'	0.0184697	7.00363	6.99077	-0.0128635
'PLA2G1B'	'00564: Glycerophospholipid metabolism, 00565: Ether lipid metabolism, 00590: Arachidonic acid metabolism, 00591: Linoleic acid metabolism, 04010: MAPK signaling pathway, 04370: VEGF signaling pathway, 04664: Fc epsilon RI signaling pathway, 04730: Long-term depression, 04912: GnRH signaling pathway'	0.232412	7.04467	7.03913	-0.00553795
'PLA2G2A'	'00564: Glycerophospholipid metabolism, 00565: Ether lipid metabolism, 00590: Arachidonic acid metabolism, 00591: Linoleic acid metabolism, 04010: MAPK signaling pathway, 04370: VEGF signaling pathway, 04664: Fc epsilon RI signaling pathway, 04730: Long-term depression, 04912: GnRH signaling pathway'	0.974253	6.85765	6.84096	-0.0166931
'PLA2G4A'	'00564: Glycerophospholipid metabolism, 00565: Ether lipid metabolism, 00590: Arachidonic acid metabolism, 00591: Linoleic acid metabolism, 04010: MAPK signaling pathway, 04370: VEGF signaling pathway, 04664: Fc epsilon RI signaling pathway, 04730: Long-term depression, 04912: GnRH signaling pathway'	0.286844	7.09074	7.09459	0.00385115
'PLA2G5'	'00564: Glycerophospholipid metabolism, 00565: Ether lipid metabolism, 00590: Arachidonic acid metabolism, 00591: Linoleic acid metabolism, 04010: MAPK signaling pathway, 04370: VEGF signaling pathway, 04664: Fc epsilon RI signaling pathway, 04730: Long-term depression, 04912: GnRH signaling pathway'	0.674797	7.04181	7.03744	-0.00436115
'PLA2G7'	'00565: Ether lipid metabolism'	0.722572	6.98512	6.98839	0.00326162
'PLAT'	'04610: Complement and coagulation cascades'	0.871799	6.93679	6.93473	-0.00205506
'PLAU'	'04610: Complement and coagulation cascades'	0.00738835	7.03598	6.97261	-0.0633758
'PLAUR'	'04610: Complement and coagulation cascades'	0.0259496	7.01083	6.97764	-0.0331878
'PLCB1'	'00562: Inositol phosphate metabolism, 04020: Calcium signaling pathway, 04070: Phosphatidylinositol signaling system, 04310: Wnt signaling pathway, 04540: Gap junction, 04720: Long-term potentiation, 04730: Long-term depression, 04912: GnRH signaling pathway, 04916: Melanogenesis'	0.317059	7.03355	7.02985	-0.00369717
'PLCB2'	'00562: Inositol phosphate metabolism, 04020: Calcium signaling pathway, 04070: Phosphatidylinositol signaling system, 04310: Wnt signaling pathway, 04540: Gap junction, 04720: Long-term potentiation, 04730: Long-term depression, 04742: Taste transduction, 04912: GnRH signaling pathway, 04916: Melanogenesis'	0.821261	7.04533	7.04372	-0.00161273
'PLCB3'	'00562: Inositol phosphate metabolism, 04020: Calcium signaling pathway, 04070: Phosphatidylinositol signaling system, 04310: Wnt signaling pathway, 04540: Gap junction, 04720: Long-term potentiation, 04730: Long-term depression, 04912: GnRH signaling pathway, 04916: Melanogenesis'	0.00407286	7.02014	7.03452	0.0143778
'PLCD1'	'00562: Inositol phosphate metabolism, 04020: Calcium signaling pathway, 04070: Phosphatidylinositol signaling system'	0.00407286	6.91002	6.95455	0.0445329
'PLCE1'	'00562: Inositol phosphate metabolism, 04020: Calcium signaling pathway, 04070: Phosphatidylinositol signaling system'	0.497916	7.03698	7.04081	0.00382622
'PLCG1'	'00562: Inositol phosphate metabolism, 04020: Calcium signaling pathway, 04070: Phosphatidylinositol signaling system, 04370: VEGF signaling pathway, 04650: Natural killer cell mediated cytotoxicity, 04660: T cell receptor signaling pathway, 04664: Fc epsilon RI signaling pathway, 04670: Leukocyte transendothelial migration, 05110: Cholera - Infection, 05120: Epithelial cell signaling in Helicoba…	0.258636	7.08388	7.08612	0.00224338
'PLCG2'	'00562: Inositol phosphate metabolism, 04020: Calcium signaling pathway, 04070: Phosphatidylinositol signaling system, 04370: VEGF signaling pathway, 04650: Natural killer cell mediated cytotoxicity, 04662: B cell receptor signaling pathway, 04664: Fc epsilon RI signaling pathway, 04670: Leukocyte transendothelial migration, 05110: Cholera - Infection, 05120: Epithelial cell signaling in Helicoba…	0.208132	7.0632	7.06901	0.0058066
'PLD1'	'00564: Glycerophospholipid metabolism, 00565: Ether lipid metabolism, 04912: GnRH signaling pathway, 05212: Pancreatic cancer'	0.258636	7.01225	7.02028	0.00802845
'PLD2'	'00564: Glycerophospholipid metabolism, 00565: Ether lipid metabolism, 04912: GnRH signaling pathway'	0.00216862	6.99806	7.01025	0.0121855
'PLEKHA8'	'05040: Huntington''s disease'	0.0758785	7.03782	7.03303	-0.00478666
'PLG'	'04080: Neuroactive ligand-receptor interaction, 04610: Complement and coagulation cascades'	0.722572	7.07488	7.07544	0.000552534
'PLK1'	'04110: Cell cycle'	0.0420206	7.20727	7.18243	-0.0248397
'PLN'	'04020: Calcium signaling pathway'	0.0489799	7.04159	7.03097	-0.0106207
'PLOD1'	'00310: Lysine degradation'	0.00268598	6.97647	6.95964	-0.016832
'PLOD2'	'00310: Lysine degradation'	0.0997601	6.99317	7.01167	0.0185012
'PLOD3'	'00310: Lysine degradation'	0.0420206	6.92212	6.90573	-0.0163922
'PLTP'	'03320: PPAR signaling pathway'	0.0997601	6.96055	6.94976	-0.0107959
'PLXNA1'	'04360: Axon guidance'	0.000340309	7.01505	7.00275	-0.0123004
'PLXNB1'	'04360: Axon guidance'	0.457892	7.02736	7.02908	0.00172288
'PLXNB2'	'04360: Axon guidance'	0.58323	7.0072	7.00947	0.00226095
'PLXNB3'	'04360: Axon guidance'	0.674797	7.04351	7.04016	-0.00334563
'PLXNC1'	'04360: Axon guidance'	0.674797	7.0199	7.02251	0.00261533
'PMCH'	'04080: Neuroactive ligand-receptor interaction'	0.0305861	7.04602	7.03653	-0.00949263
'PMVK'	'00100: Biosynthesis of steroids'	0.232412	6.96393	6.96749	0.00356898
'PNLIP'	'00561: Glycerolipid metabolism'	0.0658171	7.04112	7.03701	-0.00410831
'PNPT1'	'00230: Purine metabolism, 00240: Pyrimidine metabolism'	0.497916	7.019	7.0152	-0.00380099
'POLA1'	'00230: Purine metabolism, 00240: Pyrimidine metabolism, 03030: DNA polymerase'	0.0658171	7.04867	7.04193	-0.00674502
'POLA2'	'00230: Purine metabolism, 00240: Pyrimidine metabolism, 03030: DNA polymerase'	0.457892	7.03874	7.04275	0.00400976
'POLB'	'03030: DNA polymerase'	0.113771	6.97195	6.96261	-0.0093429
[truncated: 836 more rows]

## Sheet: Colon pathways
Path Index	Path Description	pval hypergeom	size
'00010'	' Glycolysis / Gluconeogenesis'	0.698387	38
'00020'	' Citrate cycle (TCA cycle)'	0.00399856	24
'00030'	' Pentose phosphate pathway'	0.0607498	13
'00031'	' Inositol metabolism'	0.234568	1
'00040'	' Pentose and glucuronate interconversions'	0.0877323	5
'00051'	' Fructose and mannose metabolism'	0.0399118	18
'00052'	' Galactose metabolism'	0.0799459	17
'00053'	' Ascorbate and aldarate metabolism'	0.235877	4
'00061'	' Fatty acid biosynthesis'	0.235877	4
'00062'	' Fatty acid elongation in mitochondria'	0.0206571	8
'00071'	' Fatty acid metabolism'	0.00153191	22
'00072'	' Synthesis and degradation of ketone bodies'	0.334641	5
'00100'	' Biosynthesis of steroids'	0.0569595	7
'00120'	' Bile acid biosynthesis'	0.061054	10
'00130'	' Ubiquinone biosynthesis'	0.65696	4
'00140'	' C21-Steroid hormone metabolism'	0.145577	6
'00150'	' Androgen and estrogen metabolism'	0.419553	18
'00190'	' Oxidative phosphorylation'	0.00010524	96
'00220'	' Urea cycle and metabolism of amino groups'	0.482292	15
'00230'	' Purine metabolism'	0.970423	88
'00240'	' Pyrimidine metabolism'	0.935428	56
'00251'	' Glutamate metabolism'	0.0737894	20
'00252'	' Alanine and aspartate metabolism'	0.120887	22
'00260'	' Glycine, serine and threonine metabolism'	0.120887	22
'00271'	' Methionine metabolism'	0.0251561	11
'00272'	' Cysteine metabolism'	0.283307	8
'00280'	' Valine, leucine and isoleucine degradation'	0.040843	31
'00290'	' Valine, leucine and isoleucine biosynthesis'	0.0569595	7
'00300'	' Lysine biosynthesis'	0.551689	3
'00310'	' Lysine degradation'	0.260443	34
'00330'	' Arginine and proline metabolism'	0.0552138	19
'00340'	' Histidine metabolism'	0.762347	16
'00350'	' Tyrosine metabolism'	0.945673	30
'00351'	' 1-1-1-Trichloro-2-2-bis(4-chlorophenyl)ethane (DDT) degradation'	0	0
'00360'	' Phenylalanine metabolism'	0.720313	15
'00361'	' gamma-Hexachlorocyclohexane degradation'	0.303808	12
'00362'	' Benzoate degradation via hydroxylation'	0	3
'00363'	' Bisphenol A degradation'	0.139153	3
'00380'	' Tryptophan metabolism'	0.745812	49
'00400'	' Phenylalanine, tyrosine and tryptophan biosynthesis'	0.769586	11
'00401'	' Novobiocin biosynthesis'	0.139153	3
'00410'	' beta-Alanine metabolism'	0.0607498	13
'00430'	' Taurine and hypotaurine metabolism'	0.139153	3
'00440'	' Aminophosphonate metabolism'	0.719896	10
'00450'	' Selenoamino acid metabolism'	0.150437	16
'00460'	' Cyanoamino acid metabolism'	0.0128619	3
'00471'	' D-Glutamine and D-glutamate metabolism'	0.551689	3
'00472'	' D-Arginine and D-ornithine metabolism'	0	1
'00480'	' Glutathione metabolism'	0.263343	15
'00500'	' Starch and sucrose metabolism'	0.538731	42
'00510'	' N-Glycan biosynthesis'	0.720313	15
'00511'	' N-Glycan degradation'	0.429172	6
'00512'	' O-Glycan biosynthesis'	0.0424278	4
'00520'	' Nucleotide sugars metabolism'	0.0298877	6
'00521'	' Streptomycin biosynthesis'	0.21204	7
'00530'	' Aminosugars metabolism'	0.769586	11
'00531'	' Glycosaminoglycan degradation'	0.516025	7
'00532'	' Chondroitin sulfate biosynthesis'	0.139153	3
'00533'	' Keratan sulfate biosynthesis'	0.21204	7
'00534'	' Heparan sulfate biosynthesis'	0.139153	3
'00550'	' Peptidoglycan biosynthesis'	0	1
'00561'	' Glycerolipid metabolism'	0.794969	27
'00562'	' Inositol phosphate metabolism'	0.577441	30
'00563'	' Glycosylphosphatidylinositol(GPI)-anchor biosynthesis'	0.959842	12
'00564'	' Glycerophospholipid metabolism'	0.897234	37
'00565'	' Ether lipid metabolism'	0.762347	16
'00590'	' Arachidonic acid metabolism'	0.799104	17
'00591'	' Linoleic acid metabolism'	0.356078	9
'00600'	' Sphingolipid metabolism'	0.0516158	22
'00601'	' Glycosphingolipid biosynthesis - lactoseries'	0.551689	3
'00602'	' Glycosphingolipid biosynthesis - neo-lactoseries'	0.235877	4
'00603'	' Glycosphingolipid biosynthesis - globoseries'	0.139153	3
'00604'	' Glycosphingolipid biosynthesis - ganglioseries'	0.0877323	5
'00620'	' Pyruvate metabolism'	0.367498	25
'00623'	' 2-4-Dichlorobenzoate degradation'	0.0549587	2
'00624'	' 1- and 2-Methylnaphthalene degradation'	0.882527	8
'00625'	' Tetrachloroethene degradation'	0	1
'00626'	' Nitrobenzene degradation'	0.593598	8
'00627'	' 1-4-Dichlorobenzene degradation'	0	1
'00628'	' Fluorene degradation'	0	1
'00629'	' Carbazole degradation'	0	0
'00630'	' Glyoxylate and dicarboxylate metabolism'	0.0298877	6
'00632'	' Benzoate degradation via CoA ligation'	0.496293	11
'00640'	' Propanoate metabolism'	0.0128992	21
'00642'	' Ethylbenzene degradation'	0.73754	5
'00643'	' Styrene degradation'	0.551689	3
'00650'	' Butanoate metabolism'	0.0868149	24
'00660'	' C5-Branched dibasic acid metabolism'	0.234568	1
'00670'	' One carbon pool by folate'	0.283307	8
'00680'	' Methane metabolism'	0.0569595	7
'00710'	' Carbon fixation'	0.115938	15
'00720'	' Reductive carboxylate cycle (CO2 fixation)'	0.0206571	8
'00730'	' Thiamine metabolism'	0.234568	1
'00740'	' Riboflavin metabolism'	0.661461	9
'00750'	' Vitamin B6 metabolism'	0.0424278	4
'00760'	' Nicotinate and nicotinamide metabolism'	0.0115001	15
'00770'	' Pantothenate and CoA biosynthesis'	0.516025	7
'00780'	' Biotin metabolism'	0.145577	6
'00790'	' Folate biosynthesis'	0.821651	28
'00791'	' Atrazine degradation'	0.65696	4
'00830'	' Retinol metabolism'	0.414177	2
'00860'	' Porphyrin and chlorophyll metabolism'	0.899098	15
'00900'	' Terpenoid biosynthesis'	0	2
'00902'	' Monoterpenoid biosynthesis'	0	0
'00903'	' Limonene and pinene degradation'	0.560455	12
'00904'	' Diterpenoid biosynthesis'	0.414177	2
'00910'	' Nitrogen metabolism'	0.126992	12
'00920'	' Sulfur metabolism'	0.0877323	5
'00930'	' Caprolactam degradation'	0.00509308	11
'00940'	' Stilbene, coumarine and lignin biosynthesis'	0.0877323	5
'00950'	' Alkaloid biosynthesis I'	0.235877	4
'00960'	' Alkaloid biosynthesis II'	0.719896	10
'00970'	' Aminoacyl-tRNA biosynthesis'	0.0677946	23
'00980'	' Metabolism of xenobiotics by cytochrome P450'	0.303808	12
'01030'	' Glycan structures - biosynthesis 1'	0.496245	28
'01031'	' Glycan structures - biosynthesis 2'	0.47122	19
'01032'	' Glycan structures - degradation'	0.244869	11
'01430'	' Cell Communication'	0.00828338	92
'01510'	' Neurodegenerative Disorders'	0.911185	38
'02010'	' ABC transporters - General'	0.614613	22
'03010'	' Ribosome'	0.948277	47
'03020'	' RNA polymerase'	0.639744	18
'03022'	' Basal transcription factors'	0.486275	32
'03030'	' DNA polymerase'	0.795104	22
'03050'	' Proteasome'	0.997455	31
'03060'	' Protein export'	0.427723	10
'03320'	' PPAR signaling pathway'	0.00202888	43
'04010'	' MAPK signaling pathway'	0.729875	214
'04020'	' Calcium signaling pathway'	0.937642	145
'04060'	' Cytokine-cytokine receptor interaction'	0.021931	222
'04070'	' Phosphatidylinositol signaling system'	0.387289	50
'04080'	' Neuroactive ligand-receptor interaction'	0.984788	228
'04110'	' Cell cycle'	0.885114	100
'04120'	' Ubiquitin mediated proteolysis'	0.681061	42
'04130'	' SNARE interactions in vesicular transport'	0.496245	28
'04140'	' Regulation of autophagy'	0.799104	17
'04150'	' mTOR signaling pathway'	0.844595	44
'04210'	' Apoptosis'	0.0260978	81
'04310'	' Wnt signaling pathway'	0.457396	124
'04320'	' Dorso-ventral axis formation'	0.367892	21
'04330'	' Notch signaling pathway'	0.93423	40
'04340'	' Hedgehog signaling pathway'	0.18858	43
'04350'	' TGF-beta signaling pathway'	0.526566	76
'04360'	' Axon guidance'	0.455337	107
'04370'	' VEGF signaling pathway'	0.352058	57
'04510'	' Focal adhesion'	0.00161554	182
'04512'	' ECM-receptor interaction'	0.00108277	79
'04514'	' Cell adhesion molecules (CAMs)'	0.0415452	110
'04520'	' Adherens junction'	0.342774	73
'04530'	' Tight junction'	0.104733	103
'04540'	' Gap junction'	0.315085	80
'04610'	' Complement and coagulation cascades'	0.152003	68
'04612'	' Antigen processing and presentation'	0.678596	60
'04620'	' Toll-like receptor signaling pathway'	0.657791	77
'04630'	' Jak-STAT signaling pathway'	0.848887	134
'04640'	' Hematopoietic cell lineage'	0.130614	82
'04650'	' Natural killer cell mediated cytotoxicity'	0.429251	110
'04660'	' T cell receptor signaling pathway'	0.818485	90
'04662'	' B cell receptor signaling pathway'	0.850849	59
'04664'	' Fc epsilon RI signaling pathway'	0.690798	65
'04670'	' Leukocyte transendothelial migration'	0.00575645	97
'04710'	' Circadian rhythm'	0.931301	10
'04720'	' Long-term potentiation'	0.502374	58
'04730'	' Long-term depression'	0.726587	62
'04740'	' Olfactory transduction'	0.0516158	22
'04742'	' Taste transduction'	0.521326	20
'04810'	' Regulation of actin cytoskeleton'	0.495672	177
'04910'	' Insulin signaling pathway'	0.589827	122
'04912'	' GnRH signaling pathway'	0.364611	78
'04916'	' Melanogenesis'	0.576776	78
'04920'	' Adipocytokine signaling pathway'	0.185949	66
'04930'	' Type II diabetes mellitus'	0.780265	41
'04940'	' Type I diabetes mellitus'	0.550119	38
'04950'	' Maturity onset diabetes of the young'	0.684684	19
'05010'	' Alzheimer''s disease'	0.0252369	26
'05020'	' Parkinson''s disease'	0.168393	13
'05030'	' Amyotrophic lateral sclerosis (ALS)'	0.858405	19
'05040'	' Huntington''s disease'	0.324558	24
'05050'	' Dentatorubropallidoluysian atrophy (DRPLA)'	0.899098	15
'05060'	' Prion disease'	0.619394	13
'05110'	' Cholera - Infection'	0.651806	32
'05120'	' Epithelial cell signaling in Helicobacter pylori infection'	0.129042	59
'05130'	' Pathogenic Escherichia coli infection - EHEC'	0.240322	45
'05131'	' Pathogenic Escherichia coli infection - EPEC'	0.240322	45
'05210'	' Colorectal cancer'	0.315085	80
'05212'	' Pancreatic cancer'	0.370692	70
'05214'	' Glioma'	0.296855	55
'05216'	' Thyroid cancer'	0.496245	28
'05217'	' Basal cell carcinoma'	0.462136	44
'05218'	' Melanoma'	0.271163	62
'05220'	' Chronic myeloid leukemia'	0.81329	71

## Sheet: Ewing genes
Gene	Path	pval ranksum	median SN NOTMET	median SN MET	DeltaSN MET-NOTMET
'A2M'	'04610: Complement and coagulation cascades, 05010: Alzheimer''s disease'	0.831108	6.99494	6.99157	-0.00337271
'AANAT'	'00380: Tryptophan metabolism'	0.922769	7.06207	7.06608	0.00401341
'AARS'	'00252: Alanine and aspartate metabolism, 00970: Aminoacyl-tRNA biosynthesis'	0.800995	6.91717	6.92048	0.00331266
'AASDHPPT'	'00300: Lysine biosynthesis, 00310: Lysine degradation'	0.449543	6.92066	6.89348	-0.0271839
'AASS'	'00300: Lysine biosynthesis, 00310: Lysine degradation'	0.304126	7.05896	7.06691	0.00794835
'ABAT'	'00251: Glutamate metabolism, 00252: Alanine and aspartate metabolism, 00280: Valine, leucine and isoleucine degradation, 00410: beta-Alanine metabolism, 00640: Propanoate metabolism, 00650: Butanoate metabolism'	0.382929	6.9917	6.96059	-0.0311134
'ABCA1'	'02010: ABC transporters - General'	0.135446	7.06208	7.0708	0.008725
'ABCA4'	'02010: ABC transporters - General'	0.342077	7.0661	7.07125	0.00515126
'ABCA6'	'02010: ABC transporters - General'	0.342077	7.0367	7.03938	0.00267664
'ABCA7'	'02010: ABC transporters - General'	0.771176	7.02004	7.01523	-0.00481341
'ABCA9'	'02010: ABC transporters - General'	0.145894	7.1079	7.11721	0.00930825
'ABCB1'	'02010: ABC transporters - General'	0.0916307	7.12001	7.13976	0.0197457
'ABCB7'	'02010: ABC transporters - General'	0.25264	7.00369	7.00998	0.00628791
'ABCB8'	'02010: ABC transporters - General'	0.404431	7.03199	7.03181	-0.00017791
'ABCC2'	'02010: ABC transporters - General'	0.135446	7.05559	7.07136	0.0157699
'ABCC3'	'02010: ABC transporters - General'	0.22189	7.04362	7.04955	0.00593207
'ABCC4'	'02010: ABC transporters - General'	0.892039	7.04718	7.04504	-0.00213742
'ABCC8'	'02010: ABC transporters - General, 04930: Type II diabetes mellitus'	0.473128	7.06829	7.07054	0.00224459
'ABCC9'	'02010: ABC transporters - General'	0.655633	7.05612	7.06272	0.00660649
'ABCD1'	'02010: ABC transporters - General'	0.831108	7.04727	7.05536	0.00809403
'ABCD2'	'02010: ABC transporters - General'	0.0654794	7.05617	7.06568	0.00951446
'ABCD3'	'02010: ABC transporters - General'	0.683881	6.96312	6.96653	0.00341376
'ABCG2'	'02010: ABC transporters - General'	0.831108	7.02915	7.0251	-0.0040448
'ABCG5'	'02010: ABC transporters - General'	0.984531	7.05843	7.05678	-0.00164962
'ABCG8'	'02010: ABC transporters - General'	0.712579	7.0612	7.06907	0.00787009
'ABI2'	'04810: Regulation of actin cytoskeleton'	0.0993364	6.96871	6.95147	-0.0172388
'ABL1'	'04110: Cell cycle, 04360: Axon guidance, 05130: Pathogenic Escherichia coli infection - EHEC, 05131: Pathogenic Escherichia coli infection - EPEC, 05220: Chronic myeloid leukemia'	0.800995	7.03552	7.04345	0.00792999
'ABLIM1'	'04360: Axon guidance'	0.362142	6.96951	6.95699	-0.0125282
'ABLIM3'	'04360: Axon guidance'	1	7.0381	7.03297	-0.00512833
'ABP1'	'00220: Urea cycle and metabolism of amino groups, 00260: Glycine, serine and threonine metabolism, 00340: Histidine metabolism, 00350: Tyrosine metabolism, 00360: Phenylalanine metabolism, 00380: Tryptophan metabolism, 00410: beta-Alanine metabolism, 00960: Alkaloid biosynthesis II'	0.426639	7.04982	7.05897	0.00914433
'ACAA2'	'00062: Fatty acid elongation in mitochondria, 00071: Fatty acid metabolism, 00120: Bile acid biosynthesis, 00280: Valine, leucine and isoleucine degradation, 00362: Benzoate degradation via hydroxylation'	0.145894	7.04572	7.05645	0.0107316
'ACACA'	'00061: Fatty acid biosynthesis, 00620: Pyruvate metabolism, 00640: Propanoate metabolism, 04910: Insulin signaling pathway'	0.573921	7.06245	7.06885	0.00640483
'ACACB'	'00061: Fatty acid biosynthesis, 00620: Pyruvate metabolism, 00640: Propanoate metabolism, 04910: Insulin signaling pathway, 04920: Adipocytokine signaling pathway'	0.547797	7.05695	7.06036	0.00341024
'ACAD8'	'00120: Bile acid biosynthesis, 00624: 1- and 2-Methylnaphthalene degradation'	0.0916307	7.03418	7.01643	-0.0177598
'ACAD9'	'00120: Bile acid biosynthesis, 00624: 1- and 2-Methylnaphthalene degradation'	0.322738	7.09848	7.11118	0.0126975
'ACADM'	'00071: Fatty acid metabolism, 00280: Valine, leucine and isoleucine degradation, 00410: beta-Alanine metabolism, 00640: Propanoate metabolism, 03320: PPAR signaling pathway'	0.800995	6.88715	6.89632	0.00917439
'ACADVL'	'00071: Fatty acid metabolism'	0.0417641	7.02979	7.0401	0.0103119
'ACAT2'	'00071: Fatty acid metabolism, 00072: Synthesis and degradation of ketone bodies, 00280: Valine, leucine and isoleucine degradation, 00310: Lysine degradation, 00380: Tryptophan metabolism, 00620: Pyruvate metabolism, 00632: Benzoate degradation via CoA ligation, 00640: Propanoate metabolism, 00650: Butanoate metabolism'	0.0417641	6.9483	6.92548	-0.022817
'ACHE'	'00564: Glycerophospholipid metabolism'	0.627868	7.06985	7.06985	1.34163e-06
'ACLY'	'00020: Citrate cycle (TCA cycle), 00720: Reductive carboxylate cycle (CO2 fixation)'	0.426639	6.96478	6.94874	-0.0160405
'ACO2'	'00020: Citrate cycle (TCA cycle), 00630: Glyoxylate and dicarboxylate metabolism, 00720: Reductive carboxylate cycle (CO2 fixation)'	0.473128	6.91597	6.88763	-0.0283458
'ACOT9'	'00632: Benzoate degradation via CoA ligation, 00903: Limonene and pinene degradation'	0.800995	7.02283	7.02214	-0.00068915
'ACOX1'	'00071: Fatty acid metabolism, 03320: PPAR signaling pathway'	0.135446	7.01515	7.02339	0.00824125
'ACOX3'	'00071: Fatty acid metabolism, 03320: PPAR signaling pathway'	0.74169	7.00498	7.00496	-2.15568e-05
'ACP1'	'00361: gamma-Hexachlorocyclohexane degradation, 00740: Riboflavin metabolism, 04520: Adherens junction'	0.0380198	7.02611	6.9939	-0.0322122
'ACP2'	'00361: gamma-Hexachlorocyclohexane degradation, 00740: Riboflavin metabolism'	0.342077	6.95015	6.96532	0.0151775
'ACP5'	'00361: gamma-Hexachlorocyclohexane degradation, 00740: Riboflavin metabolism'	0.771176	6.98621	6.97971	-0.00650119
'ACP6'	'00361: gamma-Hexachlorocyclohexane degradation, 00740: Riboflavin metabolism'	0.382929	6.95784	6.95835	0.000502569
'ACPP'	'00361: gamma-Hexachlorocyclohexane degradation, 00740: Riboflavin metabolism'	0.071358	7.06356	7.07502	0.0114569
'ACSL3'	'00071: Fatty acid metabolism, 03320: PPAR signaling pathway, 04920: Adipocytokine signaling pathway'	0.404431	7.03611	7.02946	-0.00664849
'ACSL4'	'00071: Fatty acid metabolism, 03320: PPAR signaling pathway, 04920: Adipocytokine signaling pathway'	0.800995	7.01507	7.01199	-0.00308436
'ACSL5'	'00071: Fatty acid metabolism, 03320: PPAR signaling pathway, 04920: Adipocytokine signaling pathway'	0.655633	7.09818	7.09406	-0.00411906
'ACSS2'	'00010: Glycolysis / Gluconeogenesis, 00620: Pyruvate metabolism, 00640: Propanoate metabolism, 00720: Reductive carboxylate cycle (CO2 fixation)'	0.573921	6.99232	6.99625	0.00393017
'ACTB'	'01430: Cell Communication, 04510: Focal adhesion, 04520: Adherens junction, 04530: Tight junction, 04670: Leukocyte transendothelial migration, 04810: Regulation of actin cytoskeleton, 05130: Pathogenic Escherichia coli infection - EHEC, 05131: Pathogenic Escherichia coli infection - EPEC'	0.473128	7.19433	7.19541	0.00108209
'ACTC1'	'01430: Cell Communication, 04510: Focal adhesion, 04520: Adherens junction, 04530: Tight junction, 04670: Leukocyte transendothelial migration, 04810: Regulation of actin cytoskeleton, 05130: Pathogenic Escherichia coli infection - EHEC, 05131: Pathogenic Escherichia coli infection - EPEC'	0.00493219	7.10579	7.12782	0.0220315
'ACTG1'	'01430: Cell Communication, 04510: Focal adhesion, 04520: Adherens junction, 04530: Tight junction, 04670: Leukocyte transendothelial migration, 04810: Regulation of actin cytoskeleton, 05110: Cholera - Infection, 05130: Pathogenic Escherichia coli infection - EHEC, 05131: Pathogenic Escherichia coli infection - EPEC'	0.362142	6.92524	6.92142	-0.0038218
'ACTG2'	'05110: Cholera - Infection'	0.831108	7.06617	7.06457	-0.00159556
'ACTN1'	'04510: Focal adhesion, 04520: Adherens junction, 04530: Tight junction, 04670: Leukocyte transendothelial migration, 04810: Regulation of actin cytoskeleton'	1	7.01552	7.02013	0.00460648
'ACTN2'	'04510: Focal adhesion, 04520: Adherens junction, 04530: Tight junction, 04670: Leukocyte transendothelial migration, 04810: Regulation of actin cytoskeleton'	0.984531	7.0326	7.02569	-0.00691018
'ACTN3'	'04510: Focal adhesion, 04520: Adherens junction, 04530: Tight junction, 04670: Leukocyte transendothelial migration, 04810: Regulation of actin cytoskeleton'	0.573921	7.07279	7.07925	0.00645891
'ACTN4'	'04510: Focal adhesion, 04520: Adherens junction, 04530: Tight junction, 04670: Leukocyte transendothelial migration, 04810: Regulation of actin cytoskeleton'	0.426639	7.05296	7.06394	0.010989
'ACVR1'	'04060: Cytokine-cytokine receptor interaction, 04350: TGF-beta signaling pathway'	0.180944	7.01588	7.02524	0.00936408
'ACVR1B'	'04010: MAPK signaling pathway, 04060: Cytokine-cytokine receptor interaction, 04350: TGF-beta signaling pathway, 04520: Adherens junction, 05210: Colorectal cancer, 05212: Pancreatic cancer, 05220: Chronic myeloid leukemia'	0.522275	7.05813	7.06565	0.00751902
'ACVR1C'	'04010: MAPK signaling pathway, 04350: TGF-beta signaling pathway, 04520: Adherens junction, 05210: Colorectal cancer, 05212: Pancreatic cancer, 05220: Chronic myeloid leukemia'	0.547797	7.04339	7.04287	-0.00052129
'ACVR2A'	'04060: Cytokine-cytokine receptor interaction, 04350: TGF-beta signaling pathway'	0.26908	7.00115	6.99934	-0.00180916
'ACVR2B'	'04060: Cytokine-cytokine receptor interaction, 04350: TGF-beta signaling pathway'	0.362142	6.99641	6.99553	-0.000872385
'ACVRL1'	'04350: TGF-beta signaling pathway'	0.74169	7.03235	7.03015	-0.00219747
'ADA'	'00230: Purine metabolism'	0.627868	7.0253	7.02627	0.000962265
'ADAM10'	'05120: Epithelial cell signaling in Helicobacter pylori infection'	0.116294	7.03593	7.04354	0.00760437
'ADAM17'	'04330: Notch signaling pathway, 05120: Epithelial cell signaling in Helicobacter pylori infection'	0.522275	7.05065	7.0458	-0.00485041
'ADAR'	'00791: Atrazine degradation'	0.0993364	6.82969	6.80896	-0.0207284
'ADCY1'	'00230: Purine metabolism, 04020: Calcium signaling pathway, 04540: Gap junction, 04720: Long-term potentiation, 04912: GnRH signaling pathway, 04916: Melanogenesis'	0.771176	7.06316	7.07078	0.00761262
'ADCY2'	'00230: Purine metabolism, 04020: Calcium signaling pathway, 04540: Gap junction, 04912: GnRH signaling pathway, 04916: Melanogenesis'	0.342077	7.05935	7.06258	0.0032293
'ADCY3'	'00230: Purine metabolism, 04020: Calcium signaling pathway, 04540: Gap junction, 04740: Olfactory transduction, 04912: GnRH signaling pathway, 04916: Melanogenesis, 05110: Cholera - Infection'	0.0993364	7.00238	6.99295	-0.00943732
'ADCY5'	'00230: Purine metabolism, 04540: Gap junction, 04912: GnRH signaling pathway, 04916: Melanogenesis'	0.145894	7.06558	7.08019	0.014612
'ADCY6'	'00230: Purine metabolism, 04540: Gap junction, 04742: Taste transduction, 04912: GnRH signaling pathway, 04916: Melanogenesis'	0.382929	7.04616	7.04796	0.00179804
'ADCY7'	'00230: Purine metabolism, 04020: Calcium signaling pathway, 04540: Gap junction, 04912: GnRH signaling pathway, 04916: Melanogenesis'	0.0380198	7.03932	7.06268	0.0233622
'ADCYAP1'	'04080: Neuroactive ligand-receptor interaction'	0.497378	7.06615	7.0709	0.00474581
'ADCYAP1R1'	'04080: Neuroactive ligand-receptor interaction'	0.984531	7.04853	7.05757	0.00904031
'ADH5'	'00010: Glycolysis / Gluconeogenesis, 00071: Fatty acid metabolism, 00120: Bile acid biosynthesis, 00350: Tyrosine metabolism, 00561: Glycerolipid metabolism, 00624: 1- and 2-Methylnaphthalene degradation, 00680: Methane metabolism, 00980: Metabolism of xenobiotics by cytochrome P450'	0.236912	6.88332	6.86504	-0.018283
'ADIPOQ'	'03320: PPAR signaling pathway, 04920: Adipocytokine signaling pathway, 04930: Type II diabetes mellitus'	0.236912	7.04794	7.06141	0.0134697
'ADIPOR1'	'04920: Adipocytokine signaling pathway'	0.953615	6.96654	6.96671	0.000170677
'ADIPOR2'	'04920: Adipocytokine signaling pathway'	0.156949	6.92403	6.90465	-0.0193775
'ADORA1'	'04080: Neuroactive ligand-receptor interaction'	0.107551	7.04191	7.04945	0.00754201
'ADORA2A'	'04020: Calcium signaling pathway, 04080: Neuroactive ligand-receptor interaction'	0.712579	7.03047	7.02458	-0.00589326
'ADORA2B'	'04020: Calcium signaling pathway, 04080: Neuroactive ligand-receptor interaction'	0.0170853	7.04779	7.06211	0.0143132
'ADRA1A'	'04020: Calcium signaling pathway, 04080: Neuroactive ligand-receptor interaction'	0.74169	7.05347	7.05195	-0.00151045
'ADRA1B'	'04020: Calcium signaling pathway, 04080: Neuroactive ligand-receptor interaction'	0.600621	7.10319	7.10787	0.00468309
'ADRA1D'	'04020: Calcium signaling pathway'	0.683881	6.97606	6.99187	0.0158137
'ADRA2A'	'04080: Neuroactive ligand-receptor interaction'	0.107551	7.04244	7.06129	0.0188528
'ADRA2B'	'04080: Neuroactive ligand-receptor interaction'	0.060006	7.05742	7.06974	0.0123286
'ADRA2C'	'04080: Neuroactive ligand-receptor interaction'	0.712579	7.01904	7.01319	-0.00584696
'ADRB1'	'04020: Calcium signaling pathway, 04080: Neuroactive ligand-receptor interaction, 04540: Gap junction'	0.522275	7.04157	7.052	0.0104273
'ADRB2'	'04020: Calcium signaling pathway, 04080: Neuroactive ligand-receptor interaction'	0.236912	7.06154	7.06152	-1.31132e-05
'ADRB3'	'04020: Calcium signaling pathway, 04080: Neuroactive ligand-receptor interaction'	0.25264	6.94738	6.97433	0.026943
'ADRBK2'	'04740: Olfactory transduction'	0.00991558	7.02082	7.03754	0.0167236
'ADSSL1'	'00230: Purine metabolism, 00252: Alanine and aspartate metabolism'	0.497378	7.03372	7.04869	0.0149637
'AGA'	'00511: N-Glycan degradation, 01032: Glycan structures - degradation'	1	7.02782	7.02027	-0.00754322
'AGL'	'00500: Starch and sucrose metabolism'	0.984531	6.89794	6.9018	0.00385768
'AGPAT1'	'00561: Glycerolipid metabolism, 00564: Glycerophospholipid metabolism, 00565: Ether lipid metabolism'	0.771176	7.008	7.00498	-0.00301381
'AGPAT4'	'00561: Glycerolipid metabolism, 00564: Glycerophospholipid metabolism, 00565: Ether lipid metabolism'	0.342077	7.02275	7.01551	-0.00723911
'AGPS'	'00565: Ether lipid metabolism'	0.426639	7.06007	7.06732	0.00724825
'AGRN'	'04512: ECM-receptor interaction'	0.74169	7.01701	7.02034	0.00332538
'AGRP'	'04080: Neuroactive ligand-receptor interaction, 04920: Adipocytokine signaling pathway'	0.25264	7.0654	7.04671	-0.0186957
'AGTR1'	'04020: Calcium signaling pathway, 04080: Neuroactive ligand-receptor interaction'	0.922769	7.05961	7.05594	-0.0036651
'AGTR2'	'04080: Neuroactive ligand-receptor interaction'	0.831108	7.0595	7.05893	-0.000566191
'AGXT'	'00252: Alanine and aspartate metabolism, 00260: Glycine, serine and threonine metabolism'	0.712579	7.05883	7.05986	0.00103195
'AHCY'	'00271: Methionine metabolism, 00450: Selenoamino acid metabolism'	0.984531	6.83402	6.83895	0.0049355
'AHCYL1'	'00271: Methionine metabolism, 00450: Selenoamino acid metabolism'	0.0993364	6.87491	6.89202	0.0171097
'AICDA'	'00240: Pyrimidine metabolism'	0.74169	7.06716	7.06411	-0.0030412
'AIFM1'	'04210: Apoptosis'	0.25264	7.0734	7.06902	-0.0043799
'AK5'	'00230: Purine metabolism'	0.26908	7.05612	7.06707	0.0109514
'AKR1B1'	'00040: Pentose and glucuronate interconversions, 00051: Fructose and mannose metabolism, 00052: Galactose metabolism, 00561: Glycerolipid metabolism, 00620: Pyruvate metabolism'	0.304126	6.88053	6.86362	-0.0169046
'AKR1B10'	'00051: Fructose and mannose metabolism, 00052: Galactose metabolism, 00053: Ascorbate and aldarate metabolism, 00120: Bile acid biosynthesis, 00260: Glycine, serine and threonine metabolism, 00310: Lysine degradation, 00363: Bisphenol A degradation, 00520: Nucleotide sugars metabolism, 00591: Linoleic acid metabolism, 00625: Tetrachloroethene degradation, 00650: Butanoate metabolism'	0.107551	7.0552	7.04077	-0.014427
'AKT1'	'04010: MAPK signaling pathway, 04150: mTOR signaling pathway, 04210: Apoptosis, 04370: VEGF signaling pathway, 04510: Focal adhesion, 04530: Tight junction, 04620: Toll-like receptor signaling pathway, 04630: Jak-STAT signaling pathway, 04660: T cell receptor signaling pathway, 04662: B cell receptor signaling pathway, 04664: Fc epsilon RI signaling pathway, 04910: Insulin signaling pathway, 049…	0.892039	7.17459	7.17645	0.00186796
'AKT2'	'04010: MAPK signaling pathway, 04150: mTOR signaling pathway, 04210: Apoptosis, 04370: VEGF signaling pathway, 04510: Focal adhesion, 04530: Tight junction, 04620: Toll-like receptor signaling pathway, 04630: Jak-STAT signaling pathway, 04660: T cell receptor signaling pathway, 04662: B cell receptor signaling pathway, 04664: Fc epsilon RI signaling pathway, 04910: Insulin signaling pathway, 049…	0.362142	7.05421	7.05576	0.00155225
'AKT3'	'04010: MAPK signaling pathway, 04150: mTOR signaling pathway, 04210: Apoptosis, 04370: VEGF signaling pathway, 04510: Focal adhesion, 04530: Tight junction, 04620: Toll-like receptor signaling pathway, 04630: Jak-STAT signaling pathway, 04660: T cell receptor signaling pathway, 04662: B cell receptor signaling pathway, 04664: Fc epsilon RI signaling pathway, 04910: Insulin signaling pathway, 049…	0.145894	7.0332	7.03917	0.00596507
'ALAS1'	'00260: Glycine, serine and threonine metabolism, 00860: Porphyrin and chlorophyll metabolism'	0.0549176	6.94816	6.93257	-0.0155953
'ALAS2'	'00260: Glycine, serine and threonine metabolism, 00860: Porphyrin and chlorophyll metabolism'	0.322738	7.06353	7.0699	0.00636866
'ALCAM'	'04514: Cell adhesion molecules (CAMs)'	0.655633	6.97185	6.97372	0.00186427
'ALDH18A1'	'00220: Urea cycle and metabolism of amino groups'	0.473128	7.00461	7.00208	-0.0025274
'ALDH1A1'	'00830: Retinol metabolism'	0.362142	6.98916	6.94904	-0.0401197
'ALDH1B1'	'00010: Glycolysis / Gluconeogenesis, 00053: Ascorbate and aldarate metabolism, 00071: Fatty acid metabolism, 00120: Bile acid biosynthesis, 00220: Urea cycle and metabolism of amino groups, 00280: Valine, leucine and isoleucine degradation, 00310: Lysine degradation, 00340: Histidine metabolism, 00380: Tryptophan metabolism, 00410: beta-Alanine metabolism, 00561: Glycerolipid metabolism, 00620: …	0.322738	7.16144	7.15899	-0.00245554
'ALDH2'	'00010: Glycolysis / Gluconeogenesis, 00053: Ascorbate and aldarate metabolism, 00071: Fatty acid metabolism, 00120: Bile acid biosynthesis, 00220: Urea cycle and metabolism of amino groups, 00280: Valine, leucine and isoleucine degradation, 00310: Lysine degradation, 00340: Histidine metabolism, 00380: Tryptophan metabolism, 00410: beta-Alanine metabolism, 00561: Glycerolipid metabolism, 00620: …	0.382929	6.98869	6.95849	-0.0302031
'ALDH5A1'	'00251: Glutamate metabolism, 00650: Butanoate metabolism'	0.712579	6.97476	6.9774	0.00263434
'ALDH9A1'	'00010: Glycolysis / Gluconeogenesis, 00053: Ascorbate and aldarate metabolism, 00071: Fatty acid metabolism, 00120: Bile acid biosynthesis, 00220: Urea cycle and metabolism of amino groups, 00280: Valine, leucine and isoleucine degradation, 00310: Lysine degradation, 00340: Histidine metabolism, 00380: Tryptophan metabolism, 00410: beta-Alanine metabolism, 00561: Glycerolipid metabolism, 00620: …	0.600621	6.83928	6.83113	-0.00814851
'ALDOA'	'00010: Glycolysis / Gluconeogenesis, 00030: Pentose phosphate pathway, 00051: Fructose and mannose metabolism, 00710: Carbon fixation'	0.25264	6.94149	6.92757	-0.0139237
'ALDOB'	'00010: Glycolysis / Gluconeogenesis, 00030: Pentose phosphate pathway, 00051: Fructose and mannose metabolism, 00710: Carbon fixation'	0.984531	7.06138	7.05876	-0.00261482
'ALDOC'	'00010: Glycolysis / Gluconeogenesis, 00030: Pentose phosphate pathway, 00051: Fructose and mannose metabolism, 00710: Carbon fixation'	0.831108	6.99351	6.98443	-0.00908601
'ALG13'	'00510: N-Glycan biosynthesis, 01030: Glycan structures - biosynthesis 1'	0.712579	6.98638	6.98353	-0.0028529
'ALOX12'	'00590: Arachidonic acid metabolism'	0.107551	7.04847	7.06236	0.0138876
'ALOX12B'	'00590: Arachidonic acid metabolism'	0.426639	7.07135	7.08011	0.00876458
'ALOX15'	'00590: Arachidonic acid metabolism, 00591: Linoleic acid metabolism'	0.125586	7.05895	7.07238	0.0134251
'ALOX5'	'00590: Arachidonic acid metabolism, 00591: Linoleic acid metabolism'	0.655633	7.05889	7.06213	0.00323231
'ALPL'	'00361: gamma-Hexachlorocyclohexane degradation, 00790: Folate biosynthesis'	0.473128	7.04004	7.04475	0.00471003
'ALPP'	'00361: gamma-Hexachlorocyclohexane degradation, 00790: Folate biosynthesis'	0.861471	7.09035	7.09732	0.0069679
'ALPPL2'	'00361: gamma-Hexachlorocyclohexane degradation, 00790: Folate biosynthesis'	0.304126	7.04822	7.05977	0.0115509
'ALS2'	'01510: Neurodegenerative Disorders, 05030: Amyotrophic lateral sclerosis (ALS)'	0.497378	7.03192	7.03874	0.00681187
'AMFR'	'00380: Tryptophan metabolism'	0.0170853	7.01675	7.03573	0.0189834
'AMH'	'04060: Cytokine-cytokine receptor interaction, 04350: TGF-beta signaling pathway'	0.522275	7.04134	7.0386	-0.00273235
'AMHR2'	'04060: Cytokine-cytokine receptor interaction, 04350: TGF-beta signaling pathway'	1	7.06955	7.06823	-0.00132594
'AMOTL1'	'04530: Tight junction'	0.125586	7.03918	7.03501	-0.00417141
'AMPD3'	'00230: Purine metabolism'	0.861471	7.07422	7.08069	0.00646777
'ANAPC1'	'04110: Cell cycle, 04120: Ubiquitin mediated proteolysis'	0.0776622	7.15349	7.14768	-0.00580861
'ANAPC10'	'04110: Cell cycle, 04120: Ubiquitin mediated proteolysis'	0.0993364	7.05987	7.07323	0.0133568
'ANAPC11'	'04110: Cell cycle, 04120: Ubiquitin mediated proteolysis'	0.286241	7.03675	7.03183	-0.00491952
'ANAPC2'	'04110: Cell cycle, 04120: Ubiquitin mediated proteolysis'	0.304126	7.12632	7.13263	0.00631703
'ANAPC4'	'04110: Cell cycle, 04120: Ubiquitin mediated proteolysis'	0.683881	6.96244	6.96456	0.00212013
'ANAPC5'	'04110: Cell cycle, 04120: Ubiquitin mediated proteolysis'	0.627868	6.96846	6.95938	-0.00908559
'ANAPC7'	'04110: Cell cycle, 04120: Ubiquitin mediated proteolysis'	0.304126	7.10871	7.10453	-0.00418361
'ANGPTL4'	'03320: PPAR signaling pathway'	0.984531	7.03998	7.04603	0.00604372
'ANPEP'	'00480: Glutathione metabolism, 04640: Hematopoietic cell lineage'	0.449543	7.06463	7.07241	0.00777609
'AOC3'	'00220: Urea cycle and metabolism of amino groups, 00260: Glycine, serine and threonine metabolism, 00340: Histidine metabolism, 00350: Tyrosine metabolism, 00360: Phenylalanine metabolism, 00380: Tryptophan metabolism, 00410: beta-Alanine metabolism, 00960: Alkaloid biosynthesis II'	0.322738	6.98656	6.94419	-0.0423695
'AOX1'	'00280: Valine, leucine and isoleucine degradation, 00350: Tyrosine metabolism, 00380: Tryptophan metabolism, 00750: Vitamin B6 metabolism, 00760: Nicotinate and nicotinamide metabolism'	0.180944	7.04881	7.03227	-0.0165327
'APAF1'	'04210: Apoptosis'	0.600621	7.06355	7.0665	0.00295034
'APBA1'	'01510: Neurodegenerative Disorders'	0.922769	7.0651	7.06038	-0.00471379
'APBB1'	'05010: Alzheimer''s disease'	0.683881	7.0395	7.04377	0.00427047
'APC'	'04310: Wnt signaling pathway, 04810: Regulation of actin cytoskeleton, 05210: Colorectal cancer, 05217: Basal cell carcinoma'	0.655633	7.06899	7.06742	-0.00157213
'APC2'	'04310: Wnt signaling pathway, 04810: Regulation of actin cytoskeleton, 05210: Colorectal cancer, 05217: Basal cell carcinoma'	0.892039	7.07115	7.06991	-0.00124016
'APH1A'	'04330: Notch signaling pathway, 05010: Alzheimer''s disease'	0.426639	7.0424	7.03623	-0.00616335
'APLP1'	'01510: Neurodegenerative Disorders, 05060: Prion disease'	0.522275	6.99591	6.97767	-0.0182323
'APOA1'	'03320: PPAR signaling pathway'	0.0844129	7.12203	7.12891	0.0068755
'APOA2'	'03320: PPAR signaling pathway'	0.522275	7.10619	7.10905	0.00286541
'APOA5'	'03320: PPAR signaling pathway'	0.953615	7.06321	7.0642	0.000986863
'APOBEC1'	'00791: Atrazine degradation'	0.22189	7.06067	7.05386	-0.00681412
'APOBEC2'	'00791: Atrazine degradation'	0.861471	7.03097	7.03586	0.00489236
'APOBEC3G'	'00791: Atrazine degradation'	0.168626	7.02928	7.03665	0.00736946
'APOC3'	'03320: PPAR signaling pathway'	0.712579	7.11172	7.11539	0.00366373
'APOE'	'01510: Neurodegenerative Disorders, 05010: Alzheimer''s disease'	0.0417641	6.94418	6.97743	0.0332489
'APP'	'01510: Neurodegenerative Disorders, 05010: Alzheimer''s disease'	0.497378	6.99289	6.98666	-0.00622582
'APPL1'	'05210: Colorectal cancer'	0.547797	6.97301	6.97798	0.00497907
'APRT'	'00230: Purine metabolism'	0.922769	6.94857	6.95287	0.00429356
'ARAF'	'04650: Natural killer cell mediated cytotoxicity, 04720: Long-term potentiation, 04730: Long-term depression, 04810: Regulation of actin cytoskeleton, 04910: Insulin signaling pathway, 05210: Colorectal cancer, 05212: Pancreatic cancer, 05214: Glioma, 05218: Melanoma, 05220: Chronic myeloid leukemia'	0.655633	7.01874	7.01697	-0.00177105
'ARF3'	'05110: Cholera - Infection'	0.168626	6.98424	6.97669	-0.00755201
'ARF4'	'05110: Cholera - Infection'	0.382929	7.07477	7.06924	-0.00553366
'ARG1'	'00220: Urea cycle and metabolism of amino groups, 00330: Arginine and proline metabolism'	0.861471	7.14183	7.14711	0.00527852
'ARG2'	'00220: Urea cycle and metabolism of amino groups, 00330: Arginine and proline metabolism'	0.22189	7.02247	7.01329	-0.00918469
'ARHGAP5'	'04510: Focal adhesion, 04670: Leukocyte transendothelial migration'	0.800995	7.00944	7.01035	0.000917359
'ARHGEF1'	'04810: Regulation of actin cytoskeleton'	0.473128	7.12817	7.13809	0.00991614
'ARHGEF12'	'04360: Axon guidance, 04810: Regulation of actin cytoskeleton'	0.125586	7.05452	7.06013	0.00561471
'ARHGEF2'	'05130: Pathogenic Escherichia coli infection - EHEC, 05131: Pathogenic Escherichia coli infection - EPEC'	0.655633	7.16026	7.1603	4.2502e-05
'ARHGEF4'	'04810: Regulation of actin cytoskeleton'	0.426639	7.07354	7.08012	0.00657977
'ARHGEF6'	'04810: Regulation of actin cytoskeleton, 05212: Pancreatic cancer'	0.0345649	6.93213	6.97757	0.0454377
'ARHGEF7'	'04810: Regulation of actin cytoskeleton'	0.497378	7.05294	7.05686	0.00391443
'ARL4D'	'05110: Cholera - Infection'	0.0844129	7.03754	7.05912	0.0215722
'ARNTL'	'04710: Circadian rhythm'	0.473128	7.04056	7.05122	0.0106654
'ARPC1B'	'04810: Regulation of actin cytoskeleton'	0.0345649	7.05307	7.07973	0.0266618
'ARPC2'	'04810: Regulation of actin cytoskeleton'	0.26908	6.83269	6.81686	-0.0158306
'ARPC3'	'04810: Regulation of actin cytoskeleton'	0.0844129	7.02033	7.03293	0.0126008
'ARPC5'	'04810: Regulation of actin cytoskeleton, 05130: Pathogenic Escherichia coli infection - EHEC, 05131: Pathogenic Escherichia coli infection - EPEC'	0.831108	6.96432	6.96397	-0.000352702
'ARRB1'	'04010: MAPK signaling pathway'	0.627868	7.0667	7.07022	0.00352083
'ARRB2'	'04010: MAPK signaling pathway, 04740: Olfactory transduction'	0.627868	6.99855	7.00408	0.00553267
'ARSA'	'00600: Sphingolipid metabolism'	0.135446	7.02897	7.0519	0.0229269
'ARSB'	'00531: Glycosaminoglycan degradation, 01032: Glycan structures - degradation'	0.180944	7.06293	7.07376	0.0108333
'ARSE'	'00150: Androgen and estrogen metabolism, 00600: Sphingolipid metabolism'	0.362142	7.03547	7.04087	0.0054007
'ASAH1'	'00600: Sphingolipid metabolism'	0.892039	6.94934	6.954	0.00466464
'ASCC3'	'00500: Starch and sucrose metabolism, 00790: Folate biosynthesis'	0.861471	6.99737	7.00497	0.00760618
'ASH1L'	'04530: Tight junction'	0.712579	6.96592	6.96999	0.00407432
'ASIP'	'04916: Melanogenesis'	0.22189	7.04068	7.04262	0.00193512
'ASL'	'00220: Urea cycle and metabolism of amino groups, 00252: Alanine and aspartate metabolism, 00330: Arginine and proline metabolism'	0.831108	7.01083	7.01076	-6.62402e-05
'ASNS'	'00252: Alanine and aspartate metabolism, 00910: Nitrogen metabolism'	0.655633	6.99177	7.00016	0.00838718
'ASS1'	'00220: Urea cycle and metabolism of amino groups, 00252: Alanine and aspartate metabolism, 00330: Arginine and proline metabolism'	0.207563	7.02392	7.03433	0.0104114
'ATF2'	'04010: MAPK signaling pathway'	0.953615	7.05703	7.06464	0.00761449
'ATF4'	'04010: MAPK signaling pathway, 04720: Long-term potentiation, 04912: GnRH signaling pathway'	0.135446	6.82575	6.80908	-0.0166696
'ATG12'	'04140: Regulation of autophagy'	0.449543	6.95194	6.94999	-0.00194835
'ATG3'	'04140: Regulation of autophagy'	0.573921	6.98597	6.98597	-2.84001e-06
'ATG5'	'04140: Regulation of autophagy'	0.573921	7.00517	7.00689	0.00171735
'ATG7'	'04140: Regulation of autophagy'	0.193918	7.04146	7.04535	0.00388934
'ATIC'	'00230: Purine metabolism, 00670: One carbon pool by folate'	0.135446	6.8687	6.84404	-0.0246583
'ATM'	'04110: Cell cycle, 04210: Apoptosis'	0.193918	7.24285	7.25063	0.00777082
'ATN1'	'01510: Neurodegenerative Disorders, 05050: Dentatorubropallidoluysian atrophy (DRPLA)'	0.26908	7.03575	7.02783	-0.00792442
'ATP2A1'	'04020: Calcium signaling pathway'	0.207563	7.05787	7.06657	0.00869308
'ATP2A2'	'04020: Calcium signaling pathway'	0.193918	6.97725	6.98717	0.00991909
'ATP2A3'	'04020: Calcium signaling pathway'	0.655633	7.06159	7.06581	0.00421586
'ATP2B1'	'04020: Calcium signaling pathway'	0.627868	6.96375	6.97487	0.0111211
'ATP2B2'	'04020: Calcium signaling pathway'	0.473128	7.06275	7.07032	0.00756858
'ATP2B3'	'04020: Calcium signaling pathway'	1	7.05639	7.04799	-0.00839978
'ATP2B4'	'04020: Calcium signaling pathway'	0.449543	6.90612	6.91045	0.00432885
'ATP4B'	'00190: Oxidative phosphorylation'	0.573921	7.06629	7.07299	0.00670069
'ATP5A1'	'00190: Oxidative phosphorylation'	0.892039	7.15767	7.15786	0.000184515
'ATP5B'	'00190: Oxidative phosphorylation'	0.207563	6.97763	6.96296	-0.0146718
'ATP5C1'	'00190: Oxidative phosphorylation'	0.193918	6.94163	6.93283	-0.00879895
'ATP5D'	'00190: Oxidative phosphorylation'	0.800995	6.94329	6.93768	-0.00561477
'ATP5E'	'00190: Oxidative phosphorylation'	0.0993364	6.96407	6.93518	-0.0288989
'ATP5F1'	'00190: Oxidative phosphorylation'	0.404431	7.02341	7.01167	-0.0117434
'ATP5G1'	'00190: Oxidative phosphorylation'	0.426639	6.9292	6.9134	-0.0157966
'ATP5H'	'00190: Oxidative phosphorylation'	0.304126	6.98211	6.96362	-0.0184959
'ATP5I'	'00190: Oxidative phosphorylation'	0.22189	6.82381	6.81416	-0.00965227
'ATP5J'	'00190: Oxidative phosphorylation'	0.304126	6.92693	6.9245	-0.00243021
'ATP5J2'	'00190: Oxidative phosphorylation'	0.771176	7.01361	6.99613	-0.0174818
'ATP5L'	'00190: Oxidative phosphorylation'	0.135446	6.89919	6.85937	-0.0398176
'ATP5O'	'00190: Oxidative phosphorylation'	0.0654794	7.0206	7.00088	-0.0197176
'ATP6V0A1'	'00190: Oxidative phosphorylation, 05110: Cholera - Infection, 05120: Epithelial cell signaling in Helicobacter pylori infection'	0.0345649	7.02422	7.04994	0.0257198
'ATP6V0A2'	'00190: Oxidative phosphorylation, 05110: Cholera - Infection, 05120: Epithelial cell signaling in Helicobacter pylori infection'	0.207563	7.03776	7.04354	0.00578158
'ATP6V0A4'	'00190: Oxidative phosphorylation, 05110: Cholera - Infection, 05120: Epithelial cell signaling in Helicobacter pylori infection'	0.25264	7.0565	7.06513	0.00863293
'ATP6V0B'	'00190: Oxidative phosphorylation, 05110: Cholera - Infection, 05120: Epithelial cell signaling in Helicobacter pylori infection'	0.382929	6.88564	6.87811	-0.00753077
'ATP6V0C'	'00190: Oxidative phosphorylation, 05110: Cholera - Infection, 05120: Epithelial cell signaling in Helicobacter pylori infection'	0.304126	6.91864	6.90426	-0.0143862
'ATP6V0D1'	'00190: Oxidative phosphorylation, 05110: Cholera - Infection, 05120: Epithelial cell signaling in Helicobacter pylori infection'	0.0232968	6.99727	7.01348	0.016217
'ATP6V0E1'	'00190: Oxidative phosphorylation, 05110: Cholera - Infection, 05120: Epithelial cell signaling in Helicobacter pylori infection'	0.0138001	6.98074	6.99434	0.0135968
'ATP6V1A'	'00190: Oxidative phosphorylation, 05110: Cholera - Infection, 05120: Epithelial cell signaling in Helicobacter pylori infection'	0.522275	6.97543	6.98438	0.00894389
'ATP6V1B1'	'00190: Oxidative phosphorylation, 05120: Epithelial cell signaling in Helicobacter pylori infection'	1	7.04747	7.04466	-0.00280411
'ATP6V1B2'	'00190: Oxidative phosphorylation, 05120: Epithelial cell signaling in Helicobacter pylori infection'	0.861471	6.9333	6.93124	-0.00205769
'ATP6V1C1'	'00190: Oxidative phosphorylation, 05110: Cholera - Infection, 05120: Epithelial cell signaling in Helicobacter pylori infection'	0.404431	6.97147	6.97924	0.00776843
'ATP6V1D'	'00190: Oxidative phosphorylation, 05110: Cholera - Infection, 05120: Epithelial cell signaling in Helicobacter pylori infection'	0.26908	7.0689	7.06113	-0.00777673
'ATP6V1E1'	'00190: Oxidative phosphorylation, 05110: Cholera - Infection, 05120: Epithelial cell signaling in Helicobacter pylori infection'	0.522275	6.91385	6.91464	0.000789276
'ATP6V1F'	'00190: Oxidative phosphorylation, 05110: Cholera - Infection, 05120: Epithelial cell signaling in Helicobacter pylori infection'	0.771176	6.9734	6.96968	-0.00372073
'ATP6V1G1'	'00190: Oxidative phosphorylation, 05110: Cholera - Infection, 05120: Epithelial cell signaling in Helicobacter pylori infection'	0.712579	6.94041	6.9417	0.00129268
'ATP6V1G2'	'00190: Oxidative phosphorylation, 05110: Cholera - Infection, 05120: Epithelial cell signaling in Helicobacter pylori infection'	0.236912	7.0857	7.09513	0.00942756
'ATP6V1H'	'00190: Oxidative phosphorylation, 05110: Cholera - Infection, 05120: Epithelial cell signaling in Helicobacter pylori infection'	0.0417641	7.00411	7.01886	0.0147464
'ATR'	'04110: Cell cycle'	0.236912	7.12248	7.12945	0.00696665
'AVP'	'04080: Neuroactive ligand-receptor interaction'	1	7.06961	7.06952	-9.37464e-05
'AVPR1A'	'04020: Calcium signaling pathway, 04080: Neuroactive ligand-receptor interaction'	0.953615	7.06319	7.06455	0.0013632
'AVPR1B'	'04020: Calcium signaling pathway, 04080: Neuroactive ligand-receptor interaction'	0.0549176	7.05574	7.07299	0.017248
'AVPR2'	'04080: Neuroactive ligand-receptor interaction'	0.712579	7.07022	7.07636	0.00614809
'AXIN1'	'04310: Wnt signaling pathway, 05210: Colorectal cancer, 05217: Basal cell carcinoma'	0.168626	7.05753	7.06129	0.00375704
'AXIN2'	'04310: Wnt signaling pathway, 05210: Colorectal cancer, 05217: Basal cell carcinoma'	0.0232968	7.06622	7.07804	0.011815
'B2M'	'04612: Antigen processing and presentation'	0.322738	6.81654	6.80473	-0.0118182
'B3GAT3'	'00532: Chondroitin sulfate biosynthesis, 01030: Glycan structures - biosynthesis 1'	0.655633	7.06745	7.06735	-9.56899e-05
'B4GALT1'	'00052: Galactose metabolism, 00510: N-Glycan biosynthesis, 00533: Keratan sulfate biosynthesis, 00602: Glycosphingolipid biosynthesis - neo-lactoseries, 01030: Glycan structures - biosynthesis 1, 01031: Glycan structures - biosynthesis 2'	0.0210375	7.04483	7.05734	0.0125077
'B4GALT3'	'00510: N-Glycan biosynthesis, 00533: Keratan sulfate biosynthesis, 00602: Glycosphingolipid biosynthesis - neo-lactoseries, 01030: Glycan structures - biosynthesis 1, 01031: Glycan structures - biosynthesis 2'	0.156949	6.94599	6.92402	-0.021963
'BACE1'	'05010: Alzheimer''s disease'	0.107551	6.98334	6.9977	0.0143603
'BAD'	'01510: Neurodegenerative Disorders, 04210: Apoptosis, 04370: VEGF signaling pathway, 04510: Focal adhesion, 04910: Insulin signaling pathway, 05030: Amyotrophic lateral sclerosis (ALS), 05210: Colorectal cancer, 05212: Pancreatic cancer, 05218: Melanoma, 05220: Chronic myeloid leukemia'	0.449543	7.01856	7.0214	0.00284216
'BAIAP2'	'04520: Adherens junction, 04810: Regulation of actin cytoskeleton, 05050: Dentatorubropallidoluysian atrophy (DRPLA)'	0.800995	7.06695	7.06616	-0.000792501
'BAX'	'01510: Neurodegenerative Disorders, 04210: Apoptosis, 05030: Amyotrophic lateral sclerosis (ALS), 05040: Huntington''s disease, 05210: Colorectal cancer'	0.831108	7.02932	7.03005	0.000727468
'BCAR1'	'04510: Focal adhesion, 04670: Leukocyte transendothelial migration, 04810: Regulation of actin cytoskeleton'	0.771176	7.0964	7.09983	0.00342687
'BCAT1'	'00280: Valine, leucine and isoleucine degradation, 00290: Valine, leucine and isoleucine biosynthesis, 00770: Pantothenate and CoA biosynthesis'	0.627868	7.02704	7.01208	-0.0149601
'BCKDHA'	'00280: Valine, leucine and isoleucine degradation'	0.107551	6.96922	6.9814	0.01218
'BCKDHB'	'00280: Valine, leucine and isoleucine degradation'	0.655633	7.03617	7.02531	-0.0108623
'BCL10'	'04660: T cell receptor signaling pathway, 04662: B cell receptor signaling pathway'	0.953615	7.06724	7.06679	-0.000451211
'BCL2'	'01510: Neurodegenerative Disorders, 04210: Apoptosis, 04510: Focal adhesion, 05030: Amyotrophic lateral sclerosis (ALS), 05060: Prion disease, 05210: Colorectal cancer'	0.984531	7.08291	7.0841	0.00119529
'BCL2L1'	'01510: Neurodegenerative Disorders, 04210: Apoptosis, 04630: Jak-STAT signaling pathway, 05030: Amyotrophic lateral sclerosis (ALS), 05212: Pancreatic cancer, 05220: Chronic myeloid leukemia'	0.683881	7.06325	7.06874	0.00549046
'BCMO1'	'00830: Retinol metabolism'	0.892039	7.12999	7.12882	-0.00116745
'BDH1'	'00072: Synthesis and degradation of ketone bodies, 00650: Butanoate metabolism'	0.22189	7.04952	7.05933	0.00980779
'BDKRB1'	'04020: Calcium signaling pathway, 04080: Neuroactive ligand-receptor interaction, 04610: Complement and coagulation cascades, 04810: Regulation of actin cytoskeleton'	0.180944	7.05018	7.0646	0.0144212
'BDKRB2'	'04020: Calcium signaling pathway, 04080: Neuroactive ligand-receptor interaction, 04610: Complement and coagulation cascades, 04810: Regulation of actin cytoskeleton'	0.22189	7.04254	7.05519	0.0126588
'BDNF'	'04010: MAPK signaling pathway, 05040: Huntington''s disease'	0.071358	7.07374	7.08204	0.00829786
'BECN1'	'04140: Regulation of autophagy'	0.156949	6.97186	6.98282	0.0109665
'BET1'	'04130: SNARE interactions in vesicular transport'	0.135446	6.98057	6.98929	0.00872084
'BET1L'	'04130: SNARE interactions in vesicular transport'	0.683881	7.03937	7.04706	0.00769473
'BID'	'04210: Apoptosis, 04650: Natural killer cell mediated cytotoxicity'	0.25264	7.11503	7.10523	-0.00980632
'BIRC2'	'04210: Apoptosis, 04510: Focal adhesion'	0.984531	6.91137	6.90974	-0.00162851
'BIRC3'	'04210: Apoptosis, 04510: Focal adhesion'	0.800995	7.07598	7.0682	-0.00778568
'BIRC5'	'05210: Colorectal cancer'	0.207563	7.02444	6.99939	-0.0250519
'BLNK'	'04662: B cell receptor signaling pathway'	0.236912	7.07517	7.08909	0.0139249
'BLVRA'	'00860: Porphyrin and chlorophyll metabolism'	0.382929	7.02019	7.02184	0.00165482
'BLVRB'	'00860: Porphyrin and chlorophyll metabolism'	0.0232968	6.93801	6.98878	0.05077
'BMP2'	'04060: Cytokine-cytokine receptor interaction, 04340: Hedgehog signaling pathway, 04350: TGF-beta signaling pathway, 05217: Basal cell carcinoma'	0.473128	7.04695	7.03609	-0.0108602
'BMP4'	'04340: Hedgehog signaling pathway, 04350: TGF-beta signaling pathway, 05217: Basal cell carcinoma'	0.861471	7.06988	7.07584	0.00595324
'BMP5'	'04340: Hedgehog signaling pathway, 04350: TGF-beta signaling pathway'	0.600621	7.04665	7.04507	-0.00157637
'BMP6'	'04340: Hedgehog signaling pathway, 04350: TGF-beta signaling pathway'	0.683881	7.06272	7.06306	0.000332271
'BMP7'	'04060: Cytokine-cytokine receptor interaction, 04340: Hedgehog signaling pathway, 04350: TGF-beta signaling pathway'	0.168626	7.05621	7.06497	0.00876459
'BMP8B'	'04340: Hedgehog signaling pathway, 04350: TGF-beta signaling pathway'	0.322738	7.05725	7.06786	0.0106124
'BMPR1A'	'04060: Cytokine-cytokine receptor interaction, 04350: TGF-beta signaling pathway'	0.953615	6.97015	6.97337	0.00321412
'BMPR1B'	'04060: Cytokine-cytokine receptor interaction, 04350: TGF-beta signaling pathway'	0.655633	7.08728	7.08225	-0.00502974
'BMPR2'	'04060: Cytokine-cytokine receptor interaction, 04350: TGF-beta signaling pathway'	0.107551	7.02844	7.04582	0.0173857
'BNIP1'	'04130: SNARE interactions in vesicular transport'	0.116294	7.01929	7.0076	-0.0116965
'BPGM'	'00010: Glycolysis / Gluconeogenesis'	0.800995	7.02823	7.02978	0.00154344
'BPNT1'	'00920: Sulfur metabolism'	0.627868	7.12586	7.12483	-0.00103161
'BRAP'	'00380: Tryptophan metabolism'	0.362142	7.0162	7.02062	0.00441923
'BRCA2'	'05212: Pancreatic cancer'	0.116294	7.04732	7.0366	-0.0107147
'BST1'	'00760: Nicotinate and nicotinamide metabolism, 04020: Calcium signaling pathway'	0.831108	7.04476	7.0472	0.00244457
'BTK'	'04662: B cell receptor signaling pathway, 04664: Fc epsilon RI signaling pathway'	0.712579	7.12268	7.11991	-0.00277159
'BTRC'	'04120: Ubiquitin mediated proteolysis, 04310: Wnt signaling pathway, 04340: Hedgehog signaling pathway'	0.0916307	7.07597	7.08442	0.0084452
'BUB1'	'04110: Cell cycle'	0.207563	7.23678	7.22786	-0.00891589
'BUB1B'	'04110: Cell cycle'	0.0138001	7.11536	7.08895	-0.0264148
'BUB3'	'04110: Cell cycle'	0.116294	7.08537	7.07769	-0.0076827
'Bcr'	'05220: Chronic myeloid leukemia'	0.573921	7.01283	7.01033	-0.00250083
'C1QA'	'04610: Complement and coagulation cascades, 05010: Alzheimer''s disease'	0.382929	6.96906	6.97859	0.0095318
'C1QB'	'04610: Complement and coagulation cascades, 05010: Alzheimer''s disease'	0.892039	6.96586	6.96048	-0.00538157
'C1QC'	'04610: Complement and coagulation cascades, 05010: Alzheimer''s disease'	0.22189	6.95269	6.97079	0.018103
'C1R'	'04610: Complement and coagulation cascades'	0.497378	6.963	6.96028	-0.00271784
'C1S'	'04610: Complement and coagulation cascades'	0.800995	7.03316	7.02752	-0.00564062
'C2'	'04610: Complement and coagulation cascades'	0.404431	7.04855	7.04728	-0.00126822
'C3'	'04610: Complement and coagulation cascades'	0.0776622	7.01619	6.89523	-0.120959
'C3AR1'	'04080: Neuroactive ligand-receptor interaction, 04610: Complement and coagulation cascades'	0.322738	6.99326	7.01366	0.0204002
'C4A'	'04610: Complement and coagulation cascades'	0.107551	7.08855	7.05321	-0.0353401
'C4BPA'	'04610: Complement and coagulation cascades'	0.0380198	7.05911	6.98399	-0.0751127
'C4BPB'	'04610: Complement and coagulation cascades'	0.145894	7.06099	7.06762	0.00662717
'C5'	'04610: Complement and coagulation cascades'	0.655633	6.99956	6.9969	-0.00265929
'C5AR1'	'04080: Neuroactive ligand-receptor interaction, 04610: Complement and coagulation cascades'	0.922769	7.0181	7.03052	0.0124274
'C6'	'04610: Complement and coagulation cascades'	0.953615	7.05226	7.04877	-0.0034954
'C7'	'04610: Complement and coagulation cascades'	0.683881	7.04679	7.04858	0.00179766
'C8A'	'04610: Complement and coagulation cascades'	0.861471	7.06685	7.06327	-0.00358334
'C8B'	'04610: Complement and coagulation cascades'	0.74169	7.06359	7.0709	0.00730559
'C8G'	'04610: Complement and coagulation cascades'	0.168626	7.05881	7.06383	0.00502504
'C9'	'04610: Complement and coagulation cascades'	0.892039	7.06132	7.06171	0.00038756
'CA11'	'00910: Nitrogen metabolism'	1	6.97001	6.96451	-0.00549949
'CA12'	'00910: Nitrogen metabolism'	0.0654794	7.0425	7.05459	0.0120902
'CA2'	'00910: Nitrogen metabolism'	0.712579	7.02151	7.01219	-0.0093283
'CA8'	'00910: Nitrogen metabolism'	0.922769	7.05853	7.06359	0.00506101
'CA9'	'00910: Nitrogen metabolism'	0.26908	7.02225	7.01168	-0.0105657
'CAB39'	'04150: mTOR signaling pathway'	0.045816	7.04333	7.03342	-0.0099073
'CACNA1A'	'04010: MAPK signaling pathway, 04020: Calcium signaling pathway, 04730: Long-term depression, 04742: Taste transduction, 04930: Type II diabetes mellitus'	0.207563	7.04637	7.06144	0.0150646
'CACNA1B'	'04010: MAPK signaling pathway, 04020: Calcium signaling pathway, 04742: Taste transduction, 04930: Type II diabetes mellitus'	0.0993364	7.06986	7.05942	-0.0104396
'CACNA1C'	'04010: MAPK signaling pathway, 04020: Calcium signaling pathway, 04720: Long-term potentiation, 04912: GnRH signaling pathway, 04930: Type II diabetes mellitus'	0.404431	7.06063	7.07156	0.0109287
'CACNA1D'	'04010: MAPK signaling pathway, 04020: Calcium signaling pathway, 04912: GnRH signaling pathway, 04930: Type II diabetes mellitus'	0.322738	7.05708	7.04509	-0.0119884
'CACNA1F'	'04010: MAPK signaling pathway, 04020: Calcium signaling pathway, 04912: GnRH signaling pathway'	0.922769	7.06532	7.0617	-0.00362596
'CACNA1G'	'04010: MAPK signaling pathway, 04020: Calcium signaling pathway, 04930: Type II diabetes mellitus'	0.449543	7.02082	7.02304	0.00221904
'CACNA1I'	'04010: MAPK signaling pathway, 04020: Calcium signaling pathway'	0.322738	7.08093	7.09057	0.00964856
'CACNA1S'	'04010: MAPK signaling pathway, 04020: Calcium signaling pathway, 04912: GnRH signaling pathway'	1	7.07506	7.08272	0.00765228
'CACNA2D4'	'04010: MAPK signaling pathway'	0.953615	7.04888	7.04855	-0.000328824
'CACNB1'	'04010: MAPK signaling pathway'	0.0844129	7.03187	7.04651	0.014645
'CACNB3'	'04010: MAPK signaling pathway'	0.0993364	7.00467	6.9904	-0.0142727
'CACNB4'	'04010: MAPK signaling pathway'	0.286241	7.06287	7.07023	0.0073586
'CACNG2'	'04010: MAPK signaling pathway'	0.426639	7.06234	7.07575	0.0134092
'CACNG7'	'04010: MAPK signaling pathway'	0.107551	7.04258	7.05798	0.0154022
'CACYBP'	'04310: Wnt signaling pathway'	0.25264	6.93634	6.91311	-0.0232265
'CAD'	'00240: Pyrimidine metabolism, 00251: Glutamate metabolism, 00252: Alanine and aspartate metabolism'	0.342077	7.03761	7.02318	-0.0144305
'CADM1'	'04514: Cell adhesion molecules (CAMs)'	0.404431	7.03131	7.0402	0.00889375
'CADM3'	'04514: Cell adhesion molecules (CAMs)'	0.342077	7.06384	7.0563	-0.00754486
'CALCR'	'04080: Neuroactive ligand-receptor interaction'	0.180944	7.06432	7.07401	0.00968819
'CALCRL'	'04080: Neuroactive ligand-receptor interaction'	0.600621	6.9885	6.99558	0.00707556
'CALM1'	'04020: Calcium signaling pathway, 04070: Phosphatidylinositol signaling system, 04720: Long-term potentiation, 04740: Olfactory transduction, 04910: Insulin signaling pathway, 04912: GnRH signaling pathway, 04916: Melanogenesis, 05040: Huntington''s disease, 05214: Glioma'	0.74169	7.14951	7.15715	0.00764149
'CALR'	'04612: Antigen processing and presentation'	0.892039	6.9098	6.91573	0.00593174
'CAMK2A'	'04020: Calcium signaling pathway, 04310: Wnt signaling pathway, 04720: Long-term potentiation, 04740: Olfactory transduction, 04912: GnRH signaling pathway, 04916: Melanogenesis, 05214: Glioma'	0.473128	7.09778	7.10424	0.00645121
'CAMK2B'	'04020: Calcium signaling pathway, 04310: Wnt signaling pathway, 04720: Long-term potentiation, 04740: Olfactory transduction, 04912: GnRH signaling pathway, 04916: Melanogenesis, 05214: Glioma'	0.0776622	7.0757	7.08487	0.00917051
'CAMK2D'	'04020: Calcium signaling pathway, 04310: Wnt signaling pathway, 04720: Long-term potentiation, 04740: Olfactory transduction, 04912: GnRH signaling pathway, 04916: Melanogenesis, 05214: Glioma'	0.060006	7.0507	7.0637	0.0130038
'CAMK2G'	'04020: Calcium signaling pathway, 04310: Wnt signaling pathway, 04720: Long-term potentiation, 04740: Olfactory transduction, 04912: GnRH signaling pathway, 04916: Melanogenesis, 05214: Glioma'	0.449543	7.06445	7.06353	-0.000915981
'CAMK4'	'04020: Calcium signaling pathway, 04720: Long-term potentiation'	0.953615	7.07011	7.06884	-0.00127022
'CAMKK1'	'04920: Adipocytokine signaling pathway'	0.0257638	7.04546	7.05357	0.00810475
'CAMKK2'	'04920: Adipocytokine signaling pathway'	0.107551	7.01577	7.02486	0.00909114
'CANX'	'04612: Antigen processing and presentation'	0.22189	6.95638	6.94555	-0.0108344
'CAPN1'	'04210: Apoptosis'	0.071358	7.00014	7.00418	0.00404608
'CAPN2'	'04210: Apoptosis, 04510: Focal adhesion'	0.236912	6.93097	6.94143	0.0104557
'CARD11'	'04660: T cell receptor signaling pathway, 04662: B cell receptor signaling pathway'	0.655633	7.06248	7.07327	0.0107909
'CASK'	'04530: Tight junction'	0.627868	7.04386	7.05091	0.00705593
'CASP1'	'01510: Neurodegenerative Disorders, 05040: Huntington''s disease, 05050: Dentatorubropallidoluysian atrophy (DRPLA)'	0.831108	7.01179	7.01504	0.00324884
'CASP10'	'04210: Apoptosis'	0.0313818	7.07754	7.09311	0.0155696
'CASP3'	'01510: Neurodegenerative Disorders, 04010: MAPK signaling pathway, 04210: Apoptosis, 04650: Natural killer cell mediated cytotoxicity, 05010: Alzheimer''s disease, 05040: Huntington''s disease, 05050: Dentatorubropallidoluysian atrophy (DRPLA), 05120: Epithelial cell signaling in Helicobacter pylori infection, 05210: Colorectal cancer'	0.600621	7.09981	7.09762	-0.00218637
'CASP6'	'01510: Neurodegenerative Disorders, 04210: Apoptosis, 05040: Huntington''s disease'	0.404431	6.97184	6.96093	-0.0109093
'CASP7'	'01510: Neurodegenerative Disorders, 04210: Apoptosis, 05010: Alzheimer''s disease, 05050: Dentatorubropallidoluysian atrophy (DRPLA)'	0.382929	6.973	6.98307	0.0100674
'CASP8'	'01510: Neurodegenerative Disorders, 04210: Apoptosis, 04620: Toll-like receptor signaling pathway, 05040: Huntington''s disease, 05050: Dentatorubropallidoluysian atrophy (DRPLA)'	0.342077	7.10099	7.09785	-0.0031385
'CASP9'	'04210: Apoptosis, 04370: VEGF signaling pathway, 05210: Colorectal cancer, 05212: Pancreatic cancer'	0.236912	7.01492	7.01827	0.00334754
'CAT'	'00380: Tryptophan metabolism, 00680: Methane metabolism, 05030: Amyotrophic lateral sclerosis (ALS)'	0.362142	6.95718	6.96909	0.0119117
'CAV1'	'04510: Focal adhesion'	0.156949	6.92433	6.90254	-0.0217867
'CAV2'	'04510: Focal adhesion'	0.984531	6.88826	6.87755	-0.0107065
'CAV3'	'04510: Focal adhesion'	0.362142	7.0686	7.06992	0.00132202
'CBL'	'04630: Jak-STAT signaling pathway, 04660: T cell receptor signaling pathway, 04910: Insulin signaling pathway, 05220: Chronic myeloid leukemia'	0.0138001	7.15152	7.16342	0.0119011
'CBLB'	'04630: Jak-STAT signaling pathway, 04660: T cell receptor signaling pathway, 04910: Insulin signaling pathway, 05220: Chronic myeloid leukemia'	0.322738	7.09857	7.09977	0.00119705
'CBLC'	'04630: Jak-STAT signaling pathway, 04660: T cell receptor signaling pathway, 04910: Insulin signaling pathway, 05220: Chronic myeloid leukemia'	0.426639	7.07272	7.0804	0.00768799
'CBR1'	'00590: Arachidonic acid metabolism'	0.74169	6.96411	6.98048	0.0163601
'CCDC6'	'05216: Thyroid cancer'	0.683881	6.95303	6.94193	-0.0110972
'CCK'	'04080: Neuroactive ligand-receptor interaction'	0.25264	6.92884	6.91414	-0.0146929
'CCKAR'	'04020: Calcium signaling pathway, 04080: Neuroactive ligand-receptor interaction'	1	7.06049	7.06302	0.0025394
'CCKBR'	'04020: Calcium signaling pathway, 04080: Neuroactive ligand-receptor interaction'	0.342077	7.0607	7.06295	0.00225335
'CCL1'	'04060: Cytokine-cytokine receptor interaction'	0.953615	7.0635	7.05919	-0.00431315
'CCL11'	'04060: Cytokine-cytokine receptor interaction'	0.362142	7.05358	7.06221	0.00863021
'CCL13'	'04060: Cytokine-cytokine receptor interaction'	0.426639	7.06598	7.07246	0.00647772
'CCL14'	'04060: Cytokine-cytokine receptor interaction'	0.547797	6.99667	7.01958	0.0229036
'CCL15'	'04060: Cytokine-cytokine receptor interaction'	0.892039	7.05835	7.05869	0.000336019
'CCL16'	'04060: Cytokine-cytokine receptor interaction'	0.342077	7.05988	7.07305	0.0131662
'CCL17'	'04060: Cytokine-cytokine receptor interaction'	0.922769	7.06288	7.05581	-0.00707189
'CCL18'	'04060: Cytokine-cytokine receptor interaction'	0.922769	7.00509	6.97586	-0.0292239
'CCL19'	'04060: Cytokine-cytokine receptor interaction'	0.953615	7.04871	7.03624	-0.0124706
'CCL2'	'04060: Cytokine-cytokine receptor interaction'	0.800995	7.03963	7.0337	-0.00593283
'CCL20'	'04060: Cytokine-cytokine receptor interaction'	0.683881	7.06754	7.0756	0.00805583
'CCL21'	'04060: Cytokine-cytokine receptor interaction'	0.426639	7.0489	7.04129	-0.00760981
'CCL22'	'04060: Cytokine-cytokine receptor interaction'	0.497378	7.06433	7.07023	0.00590321
'CCL23'	'04060: Cytokine-cytokine receptor interaction'	0.922769	7.06161	7.06577	0.00416105
'CCL25'	'04060: Cytokine-cytokine receptor interaction'	0.922769	7.0606	7.05783	-0.00276854
'CCL26'	'04060: Cytokine-cytokine receptor interaction'	0.984531	7.06355	7.05623	-0.00731783
'CCL3'	'04060: Cytokine-cytokine receptor interaction, 04620: Toll-like receptor signaling pathway'	0.0916307	7.01597	7.04656	0.030589
'CCL4'	'04060: Cytokine-cytokine receptor interaction, 04620: Toll-like receptor signaling pathway'	0.26908	7.0687	7.08049	0.0117882
'CCL5'	'04060: Cytokine-cytokine receptor interaction, 04620: Toll-like receptor signaling pathway, 05120: Epithelial cell signaling in Helicobacter pylori infection'	0.547797	7.03974	7.02738	-0.0123633
'CCL7'	'04060: Cytokine-cytokine receptor interaction'	0.473128	7.06062	7.06822	0.0076054
'CCL8'	'04060: Cytokine-cytokine receptor interaction'	0.180944	7.03884	7.06807	0.0292245
'CCNA1'	'04110: Cell cycle'	0.953615	7.0393	7.04027	0.000969079
'CCNA2'	'04110: Cell cycle'	0.0549176	7.01463	7.00121	-0.0134167
'CCNB1'	'04110: Cell cycle'	0.0417641	7.14101	7.12475	-0.0162617
'CCNB1IP1'	'00380: Tryptophan metabolism'	0.0549176	6.8702	6.8192	-0.0510008
'CCNB2'	'04110: Cell cycle'	0.0257638	7.06397	7.07143	0.00745588
'CCNB3'	'04110: Cell cycle'	0.0153656	7.04931	7.06331	0.0140022
'CCND1'	'04110: Cell cycle, 04310: Wnt signaling pathway, 04510: Focal adhesion, 04630: Jak-STAT signaling pathway, 05210: Colorectal cancer, 05212: Pancreatic cancer, 05214: Glioma, 05216: Thyroid cancer, 05218: Melanoma, 05220: Chronic myeloid leukemia'	0.449543	6.882	6.85589	-0.0261098
'CCND2'	'04110: Cell cycle, 04310: Wnt signaling pathway, 04510: Focal adhesion, 04630: Jak-STAT signaling pathway, 05216: Thyroid cancer'	0.74169	7.02551	7.02152	-0.00398717
'CCND3'	'04110: Cell cycle, 04310: Wnt signaling pathway, 04510: Focal adhesion, 04630: Jak-STAT signaling pathway, 05216: Thyroid cancer'	0.922769	7.00912	7.00506	-0.0040608
'CCNE1'	'04110: Cell cycle'	0.800995	7.07563	7.07876	0.00313109
'CCNE2'	'04110: Cell cycle'	0.236912	7.03006	7.01573	-0.014332
'CCNH'	'04110: Cell cycle'	0.600621	7.01887	7.02549	0.00662484
'CCR1'	'04060: Cytokine-cytokine receptor interaction'	0.573921	7.02275	7.02753	0.00478874
'CCR2'	'04060: Cytokine-cytokine receptor interaction'	0.800995	7.06367	7.07389	0.0102189
'CCR3'	'04060: Cytokine-cytokine receptor interaction'	0.892039	7.06404	7.0607	-0.00333917
'CCR4'	'04060: Cytokine-cytokine receptor interaction'	0.655633	7.06532	7.06768	0.00236192
'CCR5'	'04060: Cytokine-cytokine receptor interaction'	0.831108	7.07204	7.07675	0.00470714
'CCR6'	'04060: Cytokine-cytokine receptor interaction'	0.74169	7.05668	7.05639	-0.00029538
'CCR7'	'04060: Cytokine-cytokine receptor interaction'	0.892039	7.05417	7.04979	-0.00437818
'CCR8'	'04060: Cytokine-cytokine receptor interaction'	0.473128	7.05959	7.06284	0.00325545
'CCR9'	'04060: Cytokine-cytokine receptor interaction'	0.600621	7.05427	7.05477	0.000503009
'CCS'	'05030: Amyotrophic lateral sclerosis (ALS)'	0.600621	6.93906	6.94648	0.0074165
'CD14'	'04010: MAPK signaling pathway, 04620: Toll-like receptor signaling pathway, 04640: Hematopoietic cell lineage, 04810: Regulation of actin cytoskeleton, 05130: Pathogenic Escherichia coli infection - EHEC, 05131: Pathogenic Escherichia coli infection - EPEC'	0.547797	6.97671	6.98264	0.00593031
'CD19'	'04640: Hematopoietic cell lineage, 04662: B cell receptor signaling pathway'	0.304126	7.0805	7.08674	0.00623313
'CD1A'	'04640: Hematopoietic cell lineage'	0.168626	7.04769	7.0298	-0.0178858
'CD1B'	'04640: Hematopoietic cell lineage'	0.25264	7.05768	7.06831	0.0106302
'CD1C'	'04640: Hematopoietic cell lineage'	0.322738	7.06182	7.0702	0.0083821
'CD1D'	'04640: Hematopoietic cell lineage'	0.26908	7.04666	7.06002	0.0133633
'CD1E'	'04640: Hematopoietic cell lineage'	0.861471	7.06246	7.06513	0.00267053
'CD2'	'04514: Cell adhesion molecules (CAMs), 04640: Hematopoietic cell lineage'	0.831108	7.04024	7.04163	0.00139914
'CD22'	'04514: Cell adhesion molecules (CAMs), 04640: Hematopoietic cell lineage, 04662: B cell receptor signaling pathway'	0.0916307	7.06666	7.07548	0.0088203
'CD226'	'04514: Cell adhesion molecules (CAMs)'	0.573921	7.06114	7.06221	0.0010653
'CD24'	'04640: Hematopoietic cell lineage'	0.286241	7.00279	6.96261	-0.0401741
'CD244'	'04650: Natural killer cell mediated cytotoxicity'	0.304126	7.06906	7.07662	0.0075571
'CD247'	'04650: Natural killer cell mediated cytotoxicity, 04660: T cell receptor signaling pathway'	0.922769	7.09639	7.09418	-0.00220809
'CD27'	'04060: Cytokine-cytokine receptor interaction'	0.892039	7.03394	7.04245	0.00850436
'CD274'	'04514: Cell adhesion molecules (CAMs)'	0.060006	7.02976	7.04563	0.015874
'CD28'	'04514: Cell adhesion molecules (CAMs), 04660: T cell receptor signaling pathway, 04940: Type I diabetes mellitus'	0.322738	7.08775	7.09435	0.00659873
'CD33'	'04640: Hematopoietic cell lineage'	0.627868	7.06464	7.06823	0.00358535
'CD34'	'04514: Cell adhesion molecules (CAMs), 04640: Hematopoietic cell lineage'	0.426639	6.98087	6.99356	0.0126835
'CD36'	'03320: PPAR signaling pathway, 04512: ECM-receptor interaction, 04640: Hematopoietic cell lineage, 04920: Adipocytokine signaling pathway'	0.953615	7.032	7.02045	-0.0115432
'CD38'	'00760: Nicotinate and nicotinamide metabolism, 04020: Calcium signaling pathway, 04640: Hematopoietic cell lineage'	0.426639	7.06699	7.07807	0.0110833
'CD3D'	'04640: Hematopoietic cell lineage, 04660: T cell receptor signaling pathway'	0.953615	7.07177	7.06176	-0.0100141
'CD3E'	'04640: Hematopoietic cell lineage, 04660: T cell receptor signaling pathway'	0.522275	7.09331	7.10364	0.0103366
'CD3G'	'04640: Hematopoietic cell lineage, 04660: T cell receptor signaling pathway'	0.984531	7.10152	7.09693	-0.00459766
'CD4'	'04514: Cell adhesion molecules (CAMs), 04612: Antigen processing and presentation, 04640: Hematopoietic cell lineage, 04660: T cell receptor signaling pathway'	0.0284535	7.10575	7.11816	0.012411
'CD40'	'04060: Cytokine-cytokine receptor interaction, 04514: Cell adhesion molecules (CAMs), 04620: Toll-like receptor signaling pathway'	1	7.03571	7.03647	0.000760586
'CD40LG'	'04060: Cytokine-cytokine receptor interaction, 04514: Cell adhesion molecules (CAMs), 04660: T cell receptor signaling pathway'	0.547797	7.08525	7.07584	-0.00941001
'CD44'	'04512: ECM-receptor interaction, 04640: Hematopoietic cell lineage'	0.22189	7.08287	7.09077	0.00789644
'CD46'	'04610: Complement and coagulation cascades'	0.800995	6.96851	6.96284	-0.00566427
'CD47'	'04512: ECM-receptor interaction'	0.771176	7.02451	7.03092	0.00640998
'CD48'	'04650: Natural killer cell mediated cytotoxicity'	0.426639	7.05367	7.05926	0.00558553
'CD5'	'04640: Hematopoietic cell lineage'	0.236912	7.07766	7.08308	0.00541271
'CD55'	'04610: Complement and coagulation cascades, 04640: Hematopoietic cell lineage'	0.304126	7.02019	6.9777	-0.042491
'CD58'	'04514: Cell adhesion molecules (CAMs)'	1	7.0041	7.00745	0.00334775
'CD59'	'04610: Complement and coagulation cascades, 04640: Hematopoietic cell lineage'	0.74169	6.93147	6.94006	0.00859409
'CD6'	'04514: Cell adhesion molecules (CAMs)'	0.107551	7.06091	7.07505	0.0141441
'CD7'	'04640: Hematopoietic cell lineage'	0.953615	7.05464	7.03734	-0.0172991
'CD72'	'04662: B cell receptor signaling pathway'	0.712579	7.06676	7.07204	0.00528226
'CD74'	'04612: Antigen processing and presentation'	0.984531	7.0498	7.04756	-0.00224614
'CD79A'	'04662: B cell receptor signaling pathway'	0.600621	7.02926	7.02199	-0.00726902
'CD79B'	'04662: B cell receptor signaling pathway'	0.892039	7.06816	7.0701	0.00193879
'CD80'	'04514: Cell adhesion molecules (CAMs), 04620: Toll-like receptor signaling pathway, 04940: Type I diabetes mellitus'	0.922769	7.0503	7.05387	0.00357307
'CD81'	'04662: B cell receptor signaling pathway'	0.156949	6.82705	6.8049	-0.0221538
'CD86'	'04514: Cell adhesion molecules (CAMs), 04620: Toll-like receptor signaling pathway, 04940: Type I diabetes mellitus'	0.382929	7.04198	7.04276	0.000778575
'CD8A'	'04514: Cell adhesion molecules (CAMs), 04612: Antigen processing and presentation, 04640: Hematopoietic cell lineage, 04660: T cell receptor signaling pathway'	0.135446	7.08995	7.07745	-0.0124996
'CD8B'	'04514: Cell adhesion molecules (CAMs), 04612: Antigen processing and presentation, 04640: Hematopoietic cell lineage, 04660: T cell receptor signaling pathway'	0.655633	7.09	7.0866	-0.00339784
'CD9'	'04640: Hematopoietic cell lineage'	0.497378	7.13945	7.15136	0.011907
'CD99'	'04514: Cell adhesion molecules (CAMs), 04670: Leukocyte transendothelial migration'	0.655633	6.77783	6.78735	0.0095182
'CDC14A'	'04110: Cell cycle'	0.712579	7.05222	7.05288	0.000664642
'CDC14B'	'04110: Cell cycle'	0.236912	7.01732	7.0284	0.0110795
'CDC16'	'04110: Cell cycle, 04120: Ubiquitin mediated proteolysis'	0.953615	7.11374	7.11112	-0.00262321
'CDC20'	'04110: Cell cycle, 04120: Ubiquitin mediated proteolysis'	0.207563	7.08802	7.08135	-0.00666942
'CDC23'	'04110: Cell cycle, 04120: Ubiquitin mediated proteolysis'	0.0916307	7.16082	7.15227	-0.00854735
'CDC25A'	'04110: Cell cycle'	0.25264	7.06182	7.05758	-0.00424163
'CDC25B'	'04010: MAPK signaling pathway, 04110: Cell cycle'	0.627868	6.95041	6.94152	-0.00889001
'CDC25C'	'04110: Cell cycle'	0.497378	7.07289	7.0635	-0.00938483
'CDC27'	'04110: Cell cycle, 04120: Ubiquitin mediated proteolysis'	0.156949	7.1694	7.17448	0.00507963
'CDC34'	'04120: Ubiquitin mediated proteolysis'	0.180944	7.04134	7.03665	-0.00468799
'CDC42'	'04010: MAPK signaling pathway, 04360: Axon guidance, 04370: VEGF signaling pathway, 04510: Focal adhesion, 04520: Adherens junction, 04530: Tight junction, 04660: T cell receptor signaling pathway, 04670: Leukocyte transendothelial migration, 04810: Regulation of actin cytoskeleton, 04912: GnRH signaling pathway, 05120: Epithelial cell signaling in Helicobacter pylori infection, 05130: Pathogeni…	0.25264	7.11437	7.10777	-0.00660418
'CDC6'	'04110: Cell cycle'	0.286241	7.04456	7.04043	-0.00412207
'CDC7'	'04110: Cell cycle'	0.0153656	6.99467	6.96674	-0.0279285
'CDH1'	'04514: Cell adhesion molecules (CAMs), 04520: Adherens junction, 05130: Pathogenic Escherichia coli infection - EHEC, 05131: Pathogenic Escherichia coli infection - EPEC, 05216: Thyroid cancer, 05218: Melanoma'	0.426639	7.19831	7.16209	-0.0362175
'CDH15'	'04514: Cell adhesion molecules (CAMs)'	0.25264	7.05543	7.069	0.0135667
'CDH2'	'04514: Cell adhesion molecules (CAMs)'	0.322738	7.07647	7.07058	-0.00589152
'CDH3'	'04514: Cell adhesion molecules (CAMs)'	0.800995	7.06534	7.0621	-0.00324822
'CDH4'	'04514: Cell adhesion molecules (CAMs)'	0.573921	7.04554	7.04044	-0.00510485
'CDH5'	'04514: Cell adhesion molecules (CAMs), 04670: Leukocyte transendothelial migration'	0.892039	6.98933	6.98056	-0.00876762
'CDIPT'	'00564: Glycerophospholipid metabolism, 04070: Phosphatidylinositol signaling system'	0.627868	6.94791	6.94752	-0.000389937
'CDK2'	'04110: Cell cycle'	0.404431	7.11302	7.10201	-0.0110097
'CDK4'	'04110: Cell cycle, 04530: Tight junction, 04660: T cell receptor signaling pathway, 05212: Pancreatic cancer, 05214: Glioma, 05218: Melanoma, 05220: Chronic myeloid leukemia'	0.116294	6.91908	6.90276	-0.0163184
'CDK5'	'04360: Axon guidance'	0.304126	6.98153	6.97656	-0.00496508
'CDK6'	'04110: Cell cycle, 05212: Pancreatic cancer, 05214: Glioma, 05218: Melanoma, 05220: Chronic myeloid leukemia'	0.473128	7.05756	7.07314	0.0155795
'CDK7'	'04110: Cell cycle'	0.071358	7.01713	6.99886	-0.0182653
'CDKN1A'	'04110: Cell cycle, 05214: Glioma, 05218: Melanoma, 05220: Chronic myeloid leukemia'	0.683881	7.08759	7.09301	0.00541822
'CDKN1B'	'04110: Cell cycle, 05220: Chronic myeloid leukemia'	0.831108	6.93779	6.93221	-0.00557564
'CDKN1C'	'04110: Cell cycle'	0.362142	7.00669	7.01814	0.0114523
'CDKN2A'	'04110: Cell cycle, 05212: Pancreatic cancer, 05214: Glioma, 05218: Melanoma, 05220: Chronic myeloid leukemia'	0.304126	7.03975	7.01356	-0.0261854
'CDKN2B'	'04110: Cell cycle, 04350: TGF-beta signaling pathway'	0.892039	7.06375	7.06155	-0.00219453
'CDKN2C'	'04110: Cell cycle'	0.304126	6.95057	6.93596	-0.0146089
'CDKN2D'	'04110: Cell cycle'	0.116294	7.06086	7.06782	0.00695923
'CDO1'	'00272: Cysteine metabolism, 00430: Taurine and hypotaurine metabolism'	0.00885667	7.01278	7.04332	0.0305382
'CEL'	'00120: Bile acid biosynthesis, 00561: Glycerolipid metabolism'	0.712579	7.04694	7.04479	-0.00214579
'CER1'	'04310: Wnt signaling pathway'	0.0916307	7.02864	7.03571	0.00706636
'CERK'	'00600: Sphingolipid metabolism'	0.0776622	6.95551	6.93231	-0.0232069
'CES1'	'00960: Alkaloid biosynthesis II'	0.831108	6.97777	6.94157	-0.0362046
'CFB'	'04610: Complement and coagulation cascades'	0.193918	7.09019	7.1015	0.0113122
'CFD'	'04610: Complement and coagulation cascades'	0.74169	7.04544	7.0401	-0.00533927
'CFH'	'04610: Complement and coagulation cascades'	0.286241	7.06608	7.07551	0.00943084
'CFI'	'04610: Complement and coagulation cascades'	0.404431	7.03476	7.02448	-0.0102813
'CFL1'	'04360: Axon guidance, 04810: Regulation of actin cytoskeleton'	0.0916307	7.04539	7.01708	-0.0283051
'CFL2'	'04360: Axon guidance, 04810: Regulation of actin cytoskeleton'	0.922769	6.95428	6.95367	-0.000609228
'CFLAR'	'04210: Apoptosis'	0.953615	6.98672	6.98655	-0.000174734
'CFTR'	'02010: ABC transporters - General'	0.322738	7.07822	7.08535	0.00712306
'CGA'	'04080: Neuroactive ligand-receptor interaction, 04912: GnRH signaling pathway'	0.497378	7.06534	7.07457	0.00923793
'CGN'	'04530: Tight junction'	0.627868	7.06358	7.06112	-0.00246388
'CHAD'	'01430: Cell Communication, 04510: Focal adhesion, 04512: ECM-receptor interaction'	0.573921	7.05924	7.06502	0.0057811
'CHAT'	'00564: Glycerophospholipid metabolism'	0.0501941	7.05921	7.07111	0.011896
'CHD8'	'04310: Wnt signaling pathway'	0.342077	7.16102	7.16402	0.00300027
'CHEK1'	'04110: Cell cycle'	0.0654794	7.17496	7.16437	-0.0105809
'CHEK2'	'04110: Cell cycle'	0.071358	7.02074	7.00614	-0.0146027
'CHFR'	'00380: Tryptophan metabolism'	0.0993364	7.02588	7.03878	0.0128944
'CHKB'	'00260: Glycine, serine and threonine metabolism, 00564: Glycerophospholipid metabolism'	0.627868	6.96036	6.9621	0.00174454
'CHP'	'04010: MAPK signaling pathway, 04020: Calcium signaling pathway, 04210: Apoptosis, 04310: Wnt signaling pathway, 04360: Axon guidance, 04370: VEGF signaling pathway, 04650: Natural killer cell mediated cytotoxicity, 04660: T cell receptor signaling pathway, 04662: B cell receptor signaling pathway, 04720: Long-term potentiation'	0.600621	6.99985	6.98984	-0.0100155
'CHPF'	'00532: Chondroitin sulfate biosynthesis, 01030: Glycan structures - biosynthesis 1'	0.26908	6.97787	6.98649	0.00862427
'CHRD'	'04350: TGF-beta signaling pathway'	0.522275	7.06003	7.07329	0.0132633
'CHRM1'	'04020: Calcium signaling pathway, 04080: Neuroactive ligand-receptor interaction, 04810: Regulation of actin cytoskeleton'	0.74169	7.0605	7.05292	-0.00758514
'CHRM2'	'04020: Calcium signaling pathway, 04080: Neuroactive ligand-receptor interaction, 04810: Regulation of actin cytoskeleton'	0.26908	7.06135	7.06405	0.00269969
'CHRM3'	'04020: Calcium signaling pathway, 04080: Neuroactive ligand-receptor interaction, 04810: Regulation of actin cytoskeleton'	0.193918	7.06225	7.07084	0.00859081
'CHRM4'	'04080: Neuroactive ligand-receptor interaction, 04810: Regulation of actin cytoskeleton'	0.180944	7.06105	7.07227	0.0112202
'CHRNA7'	'04020: Calcium signaling pathway'	0.236912	7.05233	7.03123	-0.0210965
'CHST1'	'00533: Keratan sulfate biosynthesis, 01030: Glycan structures - biosynthesis 1'	0.573921	6.95972	6.99582	0.0360964
'CHST4'	'00533: Keratan sulfate biosynthesis, 01030: Glycan structures - biosynthesis 1'	0.953615	7.03805	7.036	-0.00205942
'CHST9'	'00272: Cysteine metabolism'	0.892039	7.06503	7.0597	-0.00532742
'CHUK'	'04010: MAPK signaling pathway, 04210: Apoptosis, 04620: Toll-like receptor signaling pathway, 04660: T cell receptor signaling pathway, 04662: B cell receptor signaling pathway, 04920: Adipocytokine signaling pathway, 05120: Epithelial cell signaling in Helicobacter pylori infection, 05212: Pancreatic cancer, 05220: Chronic myeloid leukemia'	0.497378	7.07088	7.07041	-0.000472596
'CIITA'	'04612: Antigen processing and presentation'	0.322738	7.05336	7.06105	0.00769914
'CISH'	'04630: Jak-STAT signaling pathway'	0.342077	7.02895	7.03078	0.00183186
'CKB'	'00330: Arginine and proline metabolism'	0.984531	7.02077	7.01837	-0.0024022
'CKM'	'00330: Arginine and proline metabolism'	0.207563	7.12715	7.13485	0.00769238
'CKMT2'	'00330: Arginine and proline metabolism'	0.473128	6.99497	6.98437	-0.0105958
'CLCA1'	'04740: Olfactory transduction'	0.683881	7.02831	6.9755	-0.0528131
'CLCA2'	'04740: Olfactory transduction'	0.207563	7.09432	7.10711	0.0127861
'CLCF1'	'04060: Cytokine-cytokine receptor interaction, 04630: Jak-STAT signaling pathway'	0.831108	7.02807	7.03393	0.00585932
'CLDN1'	'04514: Cell adhesion molecules (CAMs), 04530: Tight junction, 04670: Leukocyte transendothelial migration, 05130: Pathogenic Escherichia coli infection - EHEC, 05131: Pathogenic Escherichia coli infection - EPEC'	0.800995	6.96905	6.98832	0.0192664
'CLDN11'	'04514: Cell adhesion molecules (CAMs), 04530: Tight junction, 04670: Leukocyte transendothelial migration'	0.522275	7.05858	7.06666	0.00807308
'CLDN2'	'04514: Cell adhesion molecules (CAMs), 04530: Tight junction, 04670: Leukocyte transendothelial migration'	0.627868	7.05845	7.05955	0.00110135
'CLDN3'	'04514: Cell adhesion molecules (CAMs), 04530: Tight junction, 04670: Leukocyte transendothelial migration'	0.655633	7.06564	7.06608	0.00044454
'CLDN4'	'04514: Cell adhesion molecules (CAMs), 04530: Tight junction, 04670: Leukocyte transendothelial migration'	0.207563	7.06145	7.04994	-0.0115096
'CLDN5'	'04514: Cell adhesion molecules (CAMs), 04530: Tight junction, 04670: Leukocyte transendothelial migration'	0.800995	6.99293	6.98247	-0.0104581
'CLDN6'	'04514: Cell adhesion molecules (CAMs), 04530: Tight junction, 04670: Leukocyte transendothelial migration'	0.25264	7.0622	7.07153	0.00933083
'CLDN7'	'04514: Cell adhesion molecules (CAMs), 04530: Tight junction, 04670: Leukocyte transendothelial migration'	0.26908	7.03877	7.03536	-0.0034054
'CLDN8'	'04514: Cell adhesion molecules (CAMs), 04530: Tight junction, 04670: Leukocyte transendothelial migration'	0.207563	7.05124	7.06042	0.00918122
'CLOCK'	'04710: Circadian rhythm'	0.00436907	7.03232	7.05071	0.0183862
'CLTA'	'05040: Huntington''s disease'	0.116294	7.06188	7.0714	0.00952649
'CLTB'	'05040: Huntington''s disease'	0.655633	6.9895	6.99466	0.0051602
'CLTC'	'05040: Huntington''s disease'	0.207563	7.13647	7.14156	0.00508532
'CLTCL1'	'05040: Huntington''s disease'	0.0916307	7.03503	7.04573	0.0107013
'CLYBL'	'00020: Citrate cycle (TCA cycle)'	0.22189	7.04447	7.0536	0.00912248
'CMBL'	'00361: gamma-Hexachlorocyclohexane degradation, 00627: 1-4-Dichlorobenzene degradation'	0.683881	6.83781	6.83529	-0.00252062
'CNGA3'	'04740: Olfactory transduction'	0.22189	7.05333	7.0449	-0.008425
'CNGB1'	'04740: Olfactory transduction'	0.125586	7.05515	7.06907	0.0139159
'CNOT4'	'00380: Tryptophan metabolism'	0.207563	7.10254	7.10938	0.00683727
'CNR1'	'04080: Neuroactive ligand-receptor interaction'	0.116294	7.06636	7.07396	0.00759129
'CNR2'	'04080: Neuroactive ligand-receptor interaction'	0.135446	7.03563	7.04551	0.0098793
'CNTF'	'04060: Cytokine-cytokine receptor interaction, 04630: Jak-STAT signaling pathway'	0.892039	7.06733	7.07488	0.00754763
'CNTFR'	'04060: Cytokine-cytokine receptor interaction, 04630: Jak-STAT signaling pathway'	0.342077	7.05554	7.05157	-0.00397404
'CNTN1'	'04514: Cell adhesion molecules (CAMs)'	0.362142	7.07091	7.07381	0.00289942
'CNTN2'	'04514: Cell adhesion molecules (CAMs)'	0.74169	7.07729	7.08001	0.0027209
'CNTNAP1'	'04514: Cell adhesion molecules (CAMs)'	0.953615	7.00505	7.01066	0.00560262
'CNTNAP2'	'04514: Cell adhesion molecules (CAMs)'	0.322738	7.12685	7.13487	0.00802469
'COASY'	'00770: Pantothenate and CoA biosynthesis'	0.600621	6.91929	6.91213	-0.00715331
'COL11A1'	'01430: Cell Communication, 04510: Focal adhesion, 04512: ECM-receptor interaction'	0.304126	6.99552	7.01142	0.0159005
'COL11A2'	'01430: Cell Communication, 04510: Focal adhesion, 04512: ECM-receptor interaction'	0.0549176	7.02584	7.03441	0.00856868
'COL17A1'	'01430: Cell Communication'	0.627868	7.07384	7.0688	-0.00504114
'COL1A1'	'01430: Cell Communication, 04510: Focal adhesion, 04512: ECM-receptor interaction'	0.600621	6.93423	6.95454	0.0203178
'COL1A2'	'01430: Cell Communication, 04510: Focal adhesion, 04512: ECM-receptor interaction'	0.922769	6.79803	6.77981	-0.0182188
'COL2A1'	'01430: Cell Communication, 04510: Focal adhesion, 04512: ECM-receptor interaction'	0.071358	7.0777	7.09146	0.0137606
'COL3A1'	'01430: Cell Communication, 04510: Focal adhesion, 04512: ECM-receptor interaction'	0.831108	6.77779	6.76335	-0.0144388
'COL4A1'	'01430: Cell Communication, 04510: Focal adhesion, 04512: ECM-receptor interaction'	0.922769	6.90003	6.89533	-0.00470273
'COL4A2'	'01430: Cell Communication, 04510: Focal adhesion, 04512: ECM-receptor interaction'	0.547797	6.91311	6.92948	0.016374
'COL4A4'	'01430: Cell Communication, 04510: Focal adhesion, 04512: ECM-receptor interaction'	0.449543	7.06001	7.04883	-0.0111859
'COL4A6'	'01430: Cell Communication, 04510: Focal adhesion, 04512: ECM-receptor interaction'	0.953615	7.06071	7.06083	0.00012105
'COL5A1'	'01430: Cell Communication, 04510: Focal adhesion, 04512: ECM-receptor interaction'	0.831108	6.87765	6.89561	0.0179588
'COL5A2'	'01430: Cell Communication, 04510: Focal adhesion, 04512: ECM-receptor interaction'	0.683881	6.8435	6.8696	0.0261017
'COL5A3'	'01430: Cell Communication, 04510: Focal adhesion, 04512: ECM-receptor interaction'	0.547797	6.99426	7.01362	0.0193641
'COL6A1'	'01430: Cell Communication, 04510: Focal adhesion, 04512: ECM-receptor interaction'	0.168626	7.04984	7.06241	0.0125647
'COL6A2'	'01430: Cell Communication, 04510: Focal adhesion, 04512: ECM-receptor interaction'	0.045816	6.91966	6.95838	0.0387287
'COL6A3'	'01430: Cell Communication, 04510: Focal adhesion, 04512: ECM-receptor interaction'	0.953615	6.8041	6.82506	0.0209635
'COMP'	'01430: Cell Communication, 04350: TGF-beta signaling pathway, 04510: Focal adhesion'	0.00991558	6.93179	7.05841	0.126619
'COPA'	'04080: Neuroactive ligand-receptor interaction'	0.426639	7.22674	7.22636	-0.00037598
'COPS5'	'00310: Lysine degradation, 00780: Biotin metabolism'	0.207563	7.09152	7.08724	-0.00428201
'COQ6'	'00130: Ubiquinone biosynthesis'	0.286241	7.00494	7.00913	0.00418142
'CORT'	'04080: Neuroactive ligand-receptor interaction'	0.342077	7.04839	7.05404	0.00564706
'COX17'	'00190: Oxidative phosphorylation'	0.712579	6.99079	6.99161	0.000814355
'COX4I1'	'00190: Oxidative phosphorylation'	0.547797	6.90434	6.90239	-0.00195652
'COX4I2'	'00190: Oxidative phosphorylation'	0.0417641	6.99786	6.99084	-0.00702555
'COX5A'	'00190: Oxidative phosphorylation'	0.0993364	7.07306	7.05652	-0.0165368
'COX5B'	'00190: Oxidative phosphorylation'	0.22189	6.85009	6.80441	-0.0456827
'COX6A1'	'00190: Oxidative phosphorylation'	0.145894	7.07088	7.08134	0.0104605
'COX6B1'	'00190: Oxidative phosphorylation'	0.26908	6.81758	6.80774	-0.00984209
'COX6C'	'00190: Oxidative phosphorylation'	0.286241	6.77744	6.76268	-0.0147593
'COX7A2L'	'00190: Oxidative phosphorylation'	0.145894	6.88234	6.85618	-0.0261612
'COX7B'	'00190: Oxidative phosphorylation'	0.892039	6.92103	6.92011	-0.00091674
'COX7C'	'00190: Oxidative phosphorylation'	0.180944	6.76317	6.72143	-0.0417461
'COX8A'	'00190: Oxidative phosphorylation'	0.107551	6.84141	6.80093	-0.0404788
'CP'	'00860: Porphyrin and chlorophyll metabolism'	0.286241	7.07569	7.06761	-0.00808128
'CPB2'	'04610: Complement and coagulation cascades'	1	7.03259	7.01021	-0.0223775
'CPE'	'04940: Type I diabetes mellitus'	0.404431	6.89778	6.92975	0.0319729
'CPS1'	'00220: Urea cycle and metabolism of amino groups, 00251: Glutamate metabolism, 00330: Arginine and proline metabolism, 00910: Nitrogen metabolism'	0.145894	7.06422	7.07771	0.0134922
'CPT1A'	'00071: Fatty acid metabolism, 03320: PPAR signaling pathway, 04920: Adipocytokine signaling pathway'	0.831108	7.09816	7.09724	-0.000921554
'CPT2'	'00071: Fatty acid metabolism, 03320: PPAR signaling pathway, 04920: Adipocytokine signaling pathway'	0.712579	7.05615	7.06038	0.00422923
'CR1'	'04610: Complement and coagulation cascades, 04640: Hematopoietic cell lineage'	0.362142	7.06301	7.07226	0.00925862
'CR2'	'04610: Complement and coagulation cascades, 04640: Hematopoietic cell lineage, 04662: B cell receptor signaling pathway'	0.404431	7.06977	7.07705	0.00727537
'CRB3'	'04530: Tight junction'	0.861471	7.04297	7.03582	-0.00715056
'CREB1'	'04612: Antigen processing and presentation, 04916: Melanogenesis'	0.600621	7.04038	7.03909	-0.00128595
'CREB3'	'04916: Melanogenesis'	0.26908	6.95582	6.96458	0.00876403
'CREB3L1'	'04916: Melanogenesis'	0.573921	7.03109	7.03607	0.00497771
'CREB3L3'	'04916: Melanogenesis'	0.800995	7.06502	7.0695	0.00447476
'CREBBP'	'01510: Neurodegenerative Disorders, 04110: Cell cycle, 04310: Wnt signaling pathway, 04330: Notch signaling pathway, 04350: TGF-beta signaling pathway, 04520: Adherens junction, 04630: Jak-STAT signaling pathway, 04720: Long-term potentiation, 04916: Melanogenesis, 05040: Huntington''s disease'	0.683881	7.13402	7.13792	0.00390211
'CRH'	'04080: Neuroactive ligand-receptor interaction, 04730: Long-term depression'	0.522275	7.05912	7.06636	0.00724162
'CRHR1'	'04080: Neuroactive ligand-receptor interaction, 04730: Long-term depression'	0.382929	7.06586	7.06694	0.00107219
'CRHR2'	'04080: Neuroactive ligand-receptor interaction'	0.74169	7.06253	7.05932	-0.00320691
'CRK'	'04010: MAPK signaling pathway, 04510: Focal adhesion, 04810: Regulation of actin cytoskeleton, 04910: Insulin signaling pathway, 05220: Chronic myeloid leukemia'	0.322738	7.04049	7.04548	0.0049832
'CRKL'	'04010: MAPK signaling pathway, 04510: Focal adhesion, 04810: Regulation of actin cytoskeleton, 04910: Insulin signaling pathway, 05220: Chronic myeloid leukemia'	0.473128	7.0468	7.03826	-0.00853794
'CRLF2'	'04060: Cytokine-cytokine receptor interaction, 04630: Jak-STAT signaling pathway'	0.800995	7.06284	7.06702	0.00417475
'CRLS1'	'00564: Glycerophospholipid metabolism'	0.800995	7.01015	7.01458	0.00442571
'CRY1'	'04710: Circadian rhythm'	0.426639	7.01121	7.04514	0.0339346
'CS'	'00020: Citrate cycle (TCA cycle), 00630: Glyoxylate and dicarboxylate metabolism'	0.135446	6.8332	6.81158	-0.0216167
'CSDA'	'04530: Tight junction'	0.683881	7.1144	7.11823	0.00382937
'CSF1'	'04060: Cytokine-cytokine receptor interaction, 04640: Hematopoietic cell lineage'	0.404431	7.14276	7.14563	0.00287203
'CSF1R'	'04060: Cytokine-cytokine receptor interaction, 04640: Hematopoietic cell lineage'	0.473128	6.9916	7.00169	0.0100855
'CSF2'	'04060: Cytokine-cytokine receptor interaction, 04630: Jak-STAT signaling pathway, 04640: Hematopoietic cell lineage, 04650: Natural killer cell mediated cytotoxicity, 04660: T cell receptor signaling pathway, 04664: Fc epsilon RI signaling pathway'	0.800995	7.08013	7.08027	0.00014184
'CSF2RA'	'04060: Cytokine-cytokine receptor interaction, 04630: Jak-STAT signaling pathway, 04640: Hematopoietic cell lineage'	0.304126	7.07908	7.06778	-0.0112962
'CSF2RB'	'04060: Cytokine-cytokine receptor interaction, 04210: Apoptosis, 04630: Jak-STAT signaling pathway'	0.922769	7.06014	7.04818	-0.0119577
'CSF3'	'04060: Cytokine-cytokine receptor interaction, 04630: Jak-STAT signaling pathway, 04640: Hematopoietic cell lineage'	0.953615	7.05987	7.06704	0.00717015
'CSF3R'	'04060: Cytokine-cytokine receptor interaction, 04630: Jak-STAT signaling pathway, 04640: Hematopoietic cell lineage'	0.497378	7.06015	7.04579	-0.0143542
'CSK'	'04810: Regulation of actin cytoskeleton, 05120: Epithelial cell signaling in Helicobacter pylori infection'	0.25264	7.15543	7.15027	-0.00516417
'CSNK1A1'	'04310: Wnt signaling pathway, 04340: Hedgehog signaling pathway'	0.547797	6.97166	6.95612	-0.0155406
'CSNK1D'	'04340: Hedgehog signaling pathway, 04540: Gap junction, 04710: Circadian rhythm'	0.522275	6.97366	6.96221	-0.0114497
'CSNK1E'	'04310: Wnt signaling pathway, 04340: Hedgehog signaling pathway, 04710: Circadian rhythm'	0.712579	7.00429	7.00616	0.0018648
'CSNK1G1'	'04340: Hedgehog signaling pathway'	0.236912	7.02753	7.02118	-0.00634192
'CSNK1G2'	'04340: Hedgehog signaling pathway'	0.892039	6.95934	6.96239	0.0030554
'CSNK2A1'	'04310: Wnt signaling pathway, 04520: Adherens junction, 04530: Tight junction'	0.342077	7.07339	7.06984	-0.00355051
'CSNK2A2'	'04310: Wnt signaling pathway, 04520: Adherens junction, 04530: Tight junction'	0.193918	7.00352	7.01312	0.0095959
'CSNK2B'	'04310: Wnt signaling pathway, 04520: Adherens junction, 04530: Tight junction'	0.25264	6.91046	6.88589	-0.0245708
'CTBP1'	'04310: Wnt signaling pathway, 04330: Notch signaling pathway, 05220: Chronic myeloid leukemia'	0.25264	7.03811	7.05173	0.0136195
'CTBP2'	'04310: Wnt signaling pathway, 04330: Notch signaling pathway, 05220: Chronic myeloid leukemia'	0.831108	6.98047	6.99072	0.0102505
'CTF1'	'04060: Cytokine-cytokine receptor interaction, 04630: Jak-STAT signaling pathway'	0.683881	7.04674	7.04332	-0.00342473
'CTH'	'00260: Glycine, serine and threonine metabolism, 00271: Methionine metabolism, 00272: Cysteine metabolism, 00450: Selenoamino acid metabolism, 00910: Nitrogen metabolism'	0.116294	7.0437	7.03668	-0.00701865
'CTLA4'	'04514: Cell adhesion molecules (CAMs), 04660: T cell receptor signaling pathway'	0.404431	7.06929	7.07434	0.00505105
'CTNNA1'	'04520: Adherens junction, 04530: Tight junction, 04670: Leukocyte transendothelial migration'	0.953615	7.0984	7.09385	-0.00454778
'CTNNA2'	'04520: Adherens junction, 04530: Tight junction, 04670: Leukocyte transendothelial migration'	0.22189	7.0699	7.07755	0.00764796
'CTNNA3'	'04520: Adherens junction, 04530: Tight junction, 04670: Leukocyte transendothelial migration'	0.771176	7.06678	7.06959	0.00281403
'CTNNB1'	'04310: Wnt signaling pathway, 04510: Focal adhesion, 04520: Adherens junction, 04530: Tight junction, 04670: Leukocyte transendothelial migration, 04916: Melanogenesis, 05130: Pathogenic Escherichia coli infection - EHEC, 05131: Pathogenic Escherichia coli infection - EPEC, 05210: Colorectal cancer, 05216: Thyroid cancer, 05217: Basal cell carcinoma'	0.404431	7.16937	7.1688	-0.000566767
'CTNNBIP1'	'04310: Wnt signaling pathway'	0.045816	7.02789	7.04251	0.0146185
'CTNND1'	'04520: Adherens junction, 04670: Leukocyte transendothelial migration'	0.473128	7.16749	7.16612	-0.00137544
'CTPS'	'00240: Pyrimidine metabolism'	0.0313818	6.9973	6.96191	-0.0353874
'CTSB'	'04612: Antigen processing and presentation'	0.22189	6.88208	6.89539	0.0133099
'CTSG'	'04080: Neuroactive ligand-receptor interaction'	0.547797	7.07785	7.07281	-0.00503619
'CTSL1'	'04612: Antigen processing and presentation'	1	6.98026	6.97599	-0.00426815
'CTTN'	'04530: Tight junction, 05130: Pathogenic Escherichia coli infection - EHEC, 05131: Pathogenic Escherichia coli infection - EPEC'	0.800995	7.1674	7.1652	-0.00220018
'CUL1'	'04110: Cell cycle, 04120: Ubiquitin mediated proteolysis, 04310: Wnt signaling pathway, 04350: TGF-beta signaling pathway'	0.573921	7.18307	7.17764	-0.00543009
'CUL2'	'04120: Ubiquitin mediated proteolysis'	0.74169	7.03802	7.03138	-0.00663872
'CUL3'	'04120: Ubiquitin mediated proteolysis'	0.0138001	7.12159	7.1319	0.0103132
'CX3CL1'	'04060: Cytokine-cytokine receptor interaction'	0.74169	7.03105	7.03675	0.00569544
'CX3CR1'	'04060: Cytokine-cytokine receptor interaction'	0.712579	7.04471	7.0443	-0.000406931
'CXCL1'	'04060: Cytokine-cytokine receptor interaction, 05120: Epithelial cell signaling in Helicobacter pylori infection'	0.0654794	7.04804	7.01733	-0.0307041
'CXCL10'	'04060: Cytokine-cytokine receptor interaction, 04620: Toll-like receptor signaling pathway'	0.168626	7.02476	7.02029	-0.00447242
'CXCL11'	'04060: Cytokine-cytokine receptor interaction, 04620: Toll-like receptor signaling pathway'	0.712579	7.04278	7.01579	-0.0269892
'CXCL12'	'04060: Cytokine-cytokine receptor interaction, 04360: Axon guidance, 04670: Leukocyte transendothelial migration'	0.322738	6.976	7.03484	0.0588344
'CXCL13'	'04060: Cytokine-cytokine receptor interaction, 04670: Leukocyte transendothelial migration'	0.382929	7.05837	7.07052	0.012154
'CXCL2'	'04060: Cytokine-cytokine receptor interaction'	0.831108	7.05825	7.05611	-0.00213738
'CXCL5'	'04060: Cytokine-cytokine receptor interaction'	0.168626	7.05932	7.06829	0.00897378
'CXCL6'	'04060: Cytokine-cytokine receptor interaction'	0.600621	7.05685	7.05336	-0.00349746
'CXCL9'	'04060: Cytokine-cytokine receptor interaction, 04620: Toll-like receptor signaling pathway'	0.683881	7.03685	7.03053	-0.00631853
'CXCR3'	'04060: Cytokine-cytokine receptor interaction'	0.953615	7.07224	7.06699	-0.00525807
'CXCR4'	'04060: Cytokine-cytokine receptor interaction, 04360: Axon guidance, 04670: Leukocyte transendothelial migration'	0.449543	7.00469	7.01169	0.00700693
'CXXC4'	'04310: Wnt signaling pathway'	0.922769	7.02993	7.02879	-0.00114173
'CYB5R1'	'00530: Aminosugars metabolism'	0.0549176	7.00591	7.02902	0.0231107
'CYB5R3'	'00530: Aminosugars metabolism'	0.953615	6.8668	6.86424	-0.00256573
'CYBA'	'04670: Leukocyte transendothelial migration'	0.892039	7.07254	7.06879	-0.00375361
'CYBB'	'04670: Leukocyte transendothelial migration'	0.193918	7.04935	7.05958	0.010232
'CYC1'	'00190: Oxidative phosphorylation'	0.322738	6.89064	6.85345	-0.0371911
'CYCS'	'04210: Apoptosis, 05210: Colorectal cancer'	0.627868	7.0345	7.03248	-0.00202169
'CYFIP1'	'04810: Regulation of actin cytoskeleton'	0.712579	7.01516	7.01728	0.00211853
'CYFIP2'	'04810: Regulation of actin cytoskeleton'	0.145894	7.05298	7.02328	-0.029693
'CYP11A1'	'00140: C21-Steroid hormone metabolism'	0.0232968	7.0791	7.09807	0.0189665
'CYP11B1'	'00140: C21-Steroid hormone metabolism, 00150: Androgen and estrogen metabolism'	0.74169	7.06599	7.06497	-0.00101882
'CYP11B2'	'00140: C21-Steroid hormone metabolism, 00150: Androgen and estrogen metabolism'	0.207563	7.05695	7.06803	0.0110759
'CYP17A1'	'00140: C21-Steroid hormone metabolism'	0.304126	7.06085	7.07238	0.0115291
'CYP2U1'	'00590: Arachidonic acid metabolism'	0.125586	7.08387	7.09436	0.0104902
'CYP3A4'	'00361: gamma-Hexachlorocyclohexane degradation, 00591: Linoleic acid metabolism, 00980: Metabolism of xenobiotics by cytochrome P450'	0.953615	7.0498	7.04936	-0.000436618
'CYP4F2'	'00590: Arachidonic acid metabolism'	0.655633	7.06499	7.06904	0.00405018
'CYSLTR1'	'04020: Calcium signaling pathway, 04080: Neuroactive ligand-receptor interaction'	0.953615	7.04279	7.04403	0.00123861
'CYSLTR2'	'04020: Calcium signaling pathway, 04080: Neuroactive ligand-receptor interaction'	0.193918	7.05987	7.06407	0.0041916
'Cox7a2'	'00190: Oxidative phosphorylation'	0.180944	6.75747	6.75195	-0.00551616
'DAAM1'	'04310: Wnt signaling pathway'	0.0776622	6.98822	7.00082	0.012593
'DAG1'	'04512: ECM-receptor interaction'	0.600621	6.95906	6.9649	0.00584242
'DAO'	'00260: Glycine, serine and threonine metabolism, 00330: Arginine and proline metabolism, 00472: D-Arginine and D-ornithine metabolism'	0.0417641	7.03262	7.04409	0.0114669
'DARS'	'00252: Alanine and aspartate metabolism, 00970: Aminoacyl-tRNA biosynthesis'	0.627868	6.92267	6.91274	-0.00993144
'DARS2'	'00252: Alanine and aspartate metabolism, 00970: Aminoacyl-tRNA biosynthesis'	0.922769	7.00087	6.99894	-0.00192328
'DAXX'	'04010: MAPK signaling pathway'	0.156949	7.01117	6.99736	-0.013814
'DBF4'	'04110: Cell cycle'	0.207563	6.99051	6.96307	-0.0274358
'DBI'	'03320: PPAR signaling pathway'	0.180944	6.79613	6.76924	-0.0268877
'DCC'	'04360: Axon guidance, 05210: Colorectal cancer'	0.712579	7.0398	7.05084	0.0110419
'DCN'	'04350: TGF-beta signaling pathway'	0.547797	6.9178	6.92126	0.00345741
'DCT'	'00350: Tyrosine metabolism, 04916: Melanogenesis'	0.0776622	7.0563	7.06934	0.0130396
'DCTD'	'00240: Pyrimidine metabolism'	0.984531	6.93791	6.93712	-0.000786025
'DCTN1'	'05040: Huntington''s disease'	0.236912	7.07939	7.06513	-0.0142674
'DDIT3'	'04010: MAPK signaling pathway'	0.922769	6.9753	6.96578	-0.00951556
'DDIT4'	'04150: mTOR signaling pathway'	0.322738	6.87722	6.87038	-0.00683648
'DDOST'	'00510: N-Glycan biosynthesis, 01030: Glycan structures - biosynthesis 1'	0.107551	6.9943	6.98072	-0.0135757
'DDX18'	'00500: Starch and sucrose metabolism, 00790: Folate biosynthesis'	0.125586	6.97707	6.96388	-0.013196
'DDX23'	'00500: Starch and sucrose metabolism, 00790: Folate biosynthesis'	0.0284535	7.09125	7.08392	-0.00733394
'DDX4'	'00500: Starch and sucrose metabolism, 00790: Folate biosynthesis'	0.627868	7.06431	7.05758	-0.00672946
'DDX41'	'00500: Starch and sucrose metabolism, 00790: Folate biosynthesis'	0.25264	7.09546	7.08305	-0.0124122
'DDX47'	'00500: Starch and sucrose metabolism, 00790: Folate biosynthesis'	0.286241	7.10917	7.10417	-0.00500451
'DDX50'	'00500: Starch and sucrose metabolism, 00790: Folate biosynthesis'	0.382929	7.04353	7.05493	0.0113933
'DDX54'	'00500: Starch and sucrose metabolism, 00790: Folate biosynthesis'	0.0313818	7.02746	7.03163	0.0041731
'DDX56'	'00500: Starch and sucrose metabolism, 00790: Folate biosynthesis'	0.74169	6.93785	6.94209	0.0042361
'DEGS1'	'00600: Sphingolipid metabolism'	0.922769	6.87164	6.8724	0.000755451
'DES'	'01430: Cell Communication'	0.426639	7.06741	7.07752	0.0101161
'DFFA'	'04210: Apoptosis'	0.26908	6.9718	6.97056	-0.00123954
'DFFB'	'04210: Apoptosis'	0.522275	7.00436	7.0174	0.0130418
'DGKA'	'00561: Glycerolipid metabolism, 00564: Glycerophospholipid metabolism, 04070: Phosphatidylinositol signaling system'	0.382929	7.02121	7.02445	0.00323726
'DGKB'	'00561: Glycerolipid metabolism, 00564: Glycerophospholipid metabolism, 04070: Phosphatidylinositol signaling system'	0.831108	7.06192	7.06288	0.000964435
'DGKD'	'00561: Glycerolipid metabolism, 00564: Glycerophospholipid metabolism, 04070: Phosphatidylinositol signaling system'	0.286241	6.95473	6.94756	-0.00717203
'DGKE'	'00561: Glycerolipid metabolism, 00564: Glycerophospholipid metabolism, 04070: Phosphatidylinositol signaling system'	0.712579	7.06176	7.05975	-0.00200963
'DGKG'	'00561: Glycerolipid metabolism, 00564: Glycerophospholipid metabolism, 04070: Phosphatidylinositol signaling system'	0.071358	7.09047	7.09421	0.00374177
'DGKH'	'00561: Glycerolipid metabolism, 00564: Glycerophospholipid metabolism, 04070: Phosphatidylinositol signaling system'	0.984531	7.03073	7.02144	-0.00928719
'DGKQ'	'00561: Glycerolipid metabolism, 00564: Glycerophospholipid metabolism, 04070: Phosphatidylinositol signaling system'	0.74169	7.06111	7.05557	-0.00553837
'DGKZ'	'00561: Glycerolipid metabolism, 00564: Glycerophospholipid metabolism, 04070: Phosphatidylinositol signaling system'	0.045816	7.02454	7.04151	0.016973
'DGUOK'	'00230: Purine metabolism'	0.116294	6.97021	6.95213	-0.0180781
'DHCR7'	'00100: Biosynthesis of steroids'	0.168626	7.04621	7.01434	-0.0318638
'DHFR'	'00670: One carbon pool by folate, 00790: Folate biosynthesis'	0.0993364	6.9639	6.93452	-0.0293824
'DHH'	'04340: Hedgehog signaling pathway'	0.362142	7.0599	7.07282	0.0129272
'DIAPH1'	'04510: Focal adhesion, 04810: Regulation of actin cytoskeleton'	0.683881	7.22887	7.23142	0.00254367
'DIAPH2'	'04810: Regulation of actin cytoskeleton'	0.236912	6.98496	6.99057	0.00560871
'DIAPH3'	'04810: Regulation of actin cytoskeleton'	0.627868	7.17167	7.178	0.00633307
'DKK1'	'04310: Wnt signaling pathway'	0.831108	7.0675	7.06856	0.00105658
'DKK2'	'04310: Wnt signaling pathway'	0.984531	6.97483	6.95226	-0.0225764
'DKK4'	'04310: Wnt signaling pathway'	0.304126	7.06111	7.06861	0.00749475
'DLAT'	'00010: Glycolysis / Gluconeogenesis, 00252: Alanine and aspartate metabolism, 00620: Pyruvate metabolism'	0.116294	6.9737	6.96594	-0.00775843
'DLD'	'00010: Glycolysis / Gluconeogenesis, 00020: Citrate cycle (TCA cycle), 00252: Alanine and aspartate metabolism, 00260: Glycine, serine and threonine metabolism, 00620: Pyruvate metabolism'	0.0654794	6.99723	6.98501	-0.0122189
'DLL1'	'04330: Notch signaling pathway'	0.547797	7.05895	7.06283	0.00387903
'DLL3'	'04330: Notch signaling pathway'	0.473128	7.06003	7.06908	0.00904568
'DLL4'	'04330: Notch signaling pathway'	0.156949	7.03963	7.0627	0.0230723
'DLST'	'00020: Citrate cycle (TCA cycle), 00310: Lysine degradation'	0.655633	7.05462	7.06312	0.00849928
'DNMT1'	'00271: Methionine metabolism'	0.0916307	7.00784	6.99725	-0.0105926
'DNMT3A'	'00271: Methionine metabolism'	0.497378	7.01387	7.01248	-0.00139457
'DNMT3B'	'00271: Methionine metabolism'	1	7.01018	7.02305	0.0128672
'DNTT'	'04640: Hematopoietic cell lineage'	0.522275	7.08189	7.0778	-0.00408707
'DOCK1'	'04510: Focal adhesion, 04810: Regulation of actin cytoskeleton'	0.22189	7.1596	7.16382	0.00422219
'DOT1L'	'00310: Lysine degradation'	0.600621	7.05953	7.06668	0.00715168
'DPM1'	'00510: N-Glycan biosynthesis'	0.304126	7.05785	7.07478	0.0169249
'DPYS'	'00240: Pyrimidine metabolism, 00410: beta-Alanine metabolism, 00770: Pantothenate and CoA biosynthesis'	0.045816	7.05663	7.06765	0.011024
'DPYSL2'	'04360: Axon guidance'	0.404431	6.95581	6.94054	-0.0152685
'DPYSL5'	'04360: Axon guidance'	0.74169	7.05462	7.05722	0.00259523
'DRD1'	'04020: Calcium signaling pathway, 04080: Neuroactive ligand-receptor interaction, 04540: Gap junction'	0.193918	7.06198	7.0748	0.0128146
'DRD2'	'04080: Neuroactive ligand-receptor interaction, 04540: Gap junction'	0.449543	7.0531	7.05781	0.00470627
'DRD3'	'04080: Neuroactive ligand-receptor interaction'	0.573921	7.06839	7.05199	-0.0164036
'DRD4'	'04080: Neuroactive ligand-receptor interaction'	0.953615	7.06584	7.05858	-0.0072651
'DRD5'	'04080: Neuroactive ligand-receptor interaction'	0.922769	7.0451	7.04459	-0.000508907
'DSC1'	'01430: Cell Communication'	0.304126	7.06771	7.07219	0.00448073
'DSC2'	'01430: Cell Communication'	0.286241	7.05597	7.06024	0.00426929
'DSC3'	'01430: Cell Communication'	0.193918	7.05644	7.06029	0.00385085
'DSG1'	'01430: Cell Communication'	0.861471	7.12943	7.12701	-0.00241202
'DSG2'	'01430: Cell Communication'	0.180944	7.06267	7.04802	-0.014656
'DSG3'	'01430: Cell Communication'	0.655633	7.06173	7.06843	0.00669629
'DTX1'	'04330: Notch signaling pathway'	0.573921	7.02941	7.03465	0.00524173
'DTX2'	'04330: Notch signaling pathway'	0.135446	7.04826	7.03349	-0.014767
'DTX3'	'04330: Notch signaling pathway'	0.712579	7.04944	7.04864	-0.00080774
'DTX3L'	'04330: Notch signaling pathway'	0.426639	6.94635	6.92411	-0.0222397
'DTYMK'	'00240: Pyrimidine metabolism'	0.522275	7.19607	7.19696	0.00089717
'DUSP1'	'04010: MAPK signaling pathway'	0.800995	7.01499	7.01462	-0.000373214
'DUSP10'	'04010: MAPK signaling pathway'	0.831108	7.04268	7.04287	0.000195937
'DUSP14'	'04010: MAPK signaling pathway'	0.922769	6.96546	6.96987	0.00441471
'DUSP16'	'04010: MAPK signaling pathway'	0.892039	7.03798	7.03575	-0.00223307
'DUSP2'	'04010: MAPK signaling pathway'	0.655633	7.04369	7.03312	-0.0105684
'DUSP3'	'04010: MAPK signaling pathway'	0.497378	7.0172	7.01886	0.00165745
'DUSP4'	'04010: MAPK signaling pathway'	0.304126	7.02996	7.00774	-0.0222248
'DUSP5'	'04010: MAPK signaling pathway'	0.573921	7.01403	7.01835	0.00432091
'DUSP6'	'04010: MAPK signaling pathway'	0.193918	6.93505	6.9016	-0.0334464
'DUSP7'	'04010: MAPK signaling pathway'	0.74169	7.05996	7.06061	0.000645847
'DUSP8'	'04010: MAPK signaling pathway'	0.362142	7.00522	7.01403	0.00881456
'DUT'	'00240: Pyrimidine metabolism'	0.404431	6.78816	6.79707	0.00891246
'DVL1'	'04310: Wnt signaling pathway, 04330: Notch signaling pathway, 04916: Melanogenesis, 05210: Colorectal cancer, 05217: Basal cell carcinoma'	0.180944	6.99121	6.98871	-0.00250733
'DVL2'	'04310: Wnt signaling pathway, 04330: Notch signaling pathway, 04916: Melanogenesis, 05210: Colorectal cancer, 05217: Basal cell carcinoma'	0.712579	7.01562	7.01322	-0.0023972
'DVL3'	'04310: Wnt signaling pathway, 04330: Notch signaling pathway, 04916: Melanogenesis, 05210: Colorectal cancer, 05217: Basal cell carcinoma'	0.304126	7.01615	7.00644	-0.00970929
'DZIP3'	'00380: Tryptophan metabolism'	0.168626	7.01235	7.01734	0.00498652
'E2F1'	'04110: Cell cycle, 05212: Pancreatic cancer, 05214: Glioma, 05218: Melanoma, 05220: Chronic myeloid leukemia'	0.125586	7.06756	7.04316	-0.0243993
'E2F3'	'04110: Cell cycle, 05212: Pancreatic cancer, 05214: Glioma, 05218: Melanoma, 05220: Chronic myeloid leukemia'	0.045816	6.975	6.95359	-0.0214078
'E2F4'	'04110: Cell cycle, 04350: TGF-beta signaling pathway'	0.831108	7.04178	7.04233	0.000544114
'E2F5'	'04110: Cell cycle, 04350: TGF-beta signaling pathway'	0.116294	7.06381	7.07898	0.0151749
'ECH1'	'00350: Tyrosine metabolism, 00362: Benzoate degradation via hydroxylation, 00628: Fluorene degradation'	0.800995	7.04092	7.04013	-0.000794147
'ECHS1'	'00062: Fatty acid elongation in mitochondria, 00071: Fatty acid metabolism, 00280: Valine, leucine and isoleucine degradation, 00310: Lysine degradation, 00380: Tryptophan metabolism, 00410: beta-Alanine metabolism, 00632: Benzoate degradation via CoA ligation, 00640: Propanoate metabolism, 00650: Butanoate metabolism, 00903: Limonene and pinene degradation, 00930: Caprolactam degradation'	0.600621	6.87307	6.87431	0.00123895
'ECSIT'	'04010: MAPK signaling pathway'	0.426639	6.99566	7.00789	0.0122321
'EDA'	'04060: Cytokine-cytokine receptor interaction'	0.0345649	7.03742	7.0576	0.0201797
'EDA2R'	'04060: Cytokine-cytokine receptor interaction'	0.342077	7.05876	7.06111	0.00235114
'EDAR'	'04060: Cytokine-cytokine receptor interaction'	0.116294	7.03011	7.04066	0.0105473
'EDEM1'	'00520: Nucleotide sugars metabolism, 00530: Aminosugars metabolism'	1	7.01956	7.01597	-0.00359616
'EDN1'	'04080: Neuroactive ligand-receptor interaction, 04916: Melanogenesis'	0.304126	7.05459	7.0207	-0.0338897
'EDN2'	'04080: Neuroactive ligand-receptor interaction'	0.060006	7.03712	7.05479	0.0176721
'EDN3'	'04080: Neuroactive ligand-receptor interaction'	0.236912	7.06406	7.06894	0.00488062
'EDNRA'	'04020: Calcium signaling pathway, 04080: Neuroactive ligand-receptor interaction'	0.497378	6.96947	6.99802	0.028546
'EDNRB'	'04020: Calcium signaling pathway, 04080: Neuroactive ligand-receptor interaction, 04916: Melanogenesis'	0.382929	7.03322	7.0114	-0.021816
'EFNA1'	'04360: Axon guidance'	0.045816	6.98304	6.94181	-0.0412284
'EFNA2'	'04360: Axon guidance'	0.0549176	7.0671	7.07574	0.00863934
'EFNA3'	'04360: Axon guidance'	0.683881	7.00253	6.99373	-0.00879958
'EFNA4'	'04360: Axon guidance'	0.771176	7.01034	7.00774	-0.00260416
'EFNA5'	'04360: Axon guidance'	0.304126	7.06886	7.07397	0.00510758
'EFNB1'	'04360: Axon guidance'	0.22189	6.99914	7.00807	0.00893853
'EFNB2'	'04360: Axon guidance'	0.984531	6.93843	6.94539	0.00695478
'EFNB3'	'04360: Axon guidance'	0.861471	7.01984	7.02235	0.00251425
'EGF'	'04010: MAPK signaling pathway, 04060: Cytokine-cytokine receptor interaction, 04510: Focal adhesion, 04540: Gap junction, 04810: Regulation of actin cytoskeleton, 05212: Pancreatic cancer, 05214: Glioma, 05218: Melanoma'	0.984531	7.08567	7.05283	-0.0328401
'EGFR'	'04010: MAPK signaling pathway, 04020: Calcium signaling pathway, 04060: Cytokine-cytokine receptor interaction, 04320: Dorso-ventral axis formation, 04510: Focal adhesion, 04520: Adherens junction, 04540: Gap junction, 04810: Regulation of actin cytoskeleton, 04912: GnRH signaling pathway, 05120: Epithelial cell signaling in Helicobacter pylori infection, 05210: Colorectal cancer, 05212: Pancrea…	0.547797	7.22306	7.22129	-0.00177168
'EGLN1'	'00904: Diterpenoid biosynthesis'	0.892039	7.01342	7.0087	-0.00472255
'EGLN3'	'00904: Diterpenoid biosynthesis'	0.0916307	7.04144	7.06503	0.0235881
'EHHADH'	'00071: Fatty acid metabolism, 00280: Valine, leucine and isoleucine degradation, 00310: Lysine degradation, 00380: Tryptophan metabolism, 00410: beta-Alanine metabolism, 00632: Benzoate degradation via CoA ligation, 00640: Propanoate metabolism, 00650: Butanoate metabolism, 00903: Limonene and pinene degradation, 00930: Caprolactam degradation, 03320: PPAR signaling pathway'	0.771176	7.0972	7.09244	-0.00475623
'EHMT1'	'00310: Lysine degradation'	0.0232968	7.14505	7.16104	0.0159969
'EHMT2'	'00310: Lysine degradation'	0.180944	7.05665	7.07148	0.0148282
'EIF4B'	'04150: mTOR signaling pathway'	0.116294	6.96343	6.93873	-0.0246959
'EIF4E'	'04150: mTOR signaling pathway, 04910: Insulin signaling pathway'	0.180944	6.98461	6.98189	-0.00272841
'EIF4E2'	'04150: mTOR signaling pathway, 04910: Insulin signaling pathway'	0.800995	7.00244	7.00325	0.000809673
'EIF4EBP1'	'04150: mTOR signaling pathway, 04910: Insulin signaling pathway'	0.362142	6.92417	6.89617	-0.0280004
'ELK1'	'04010: MAPK signaling pathway, 04510: Focal adhesion, 04910: Insulin signaling pathway, 04912: GnRH signaling pathway'	0.600621	7.03061	7.02033	-0.0102803
'ELK4'	'04010: MAPK signaling pathway'	0.25264	7.05774	7.06257	0.00483777
'ENDOG'	'04210: Apoptosis'	0.168626	7.00347	6.98423	-0.0192415
'ENO1'	'00010: Glycolysis / Gluconeogenesis, 00400: Phenylalanine, tyrosine and tryptophan biosynthesis'	0.0549176	6.94931	6.91535	-0.0339601
'ENO2'	'00010: Glycolysis / Gluconeogenesis, 00400: Phenylalanine, tyrosine and tryptophan biosynthesis'	0.00556017	6.96466	6.90547	-0.0591896
'ENO3'	'00010: Glycolysis / Gluconeogenesis, 00400: Phenylalanine, tyrosine and tryptophan biosynthesis'	0.449543	7.11584	7.11945	0.00361631
'ENPP1'	'00230: Purine metabolism, 00500: Starch and sucrose metabolism, 00740: Riboflavin metabolism, 00760: Nicotinate and nicotinamide metabolism, 00770: Pantothenate and CoA biosynthesis'	0.0138001	6.92662	7.04144	0.114812
'ENTPD2'	'00230: Purine metabolism'	0.236912	7.06651	7.07308	0.00657524
'ENTPD5'	'00230: Purine metabolism, 00240: Pyrimidine metabolism'	0.922769	7.03316	7.03661	0.00344951
'EP300'	'01510: Neurodegenerative Disorders, 04110: Cell cycle, 04310: Wnt signaling pathway, 04330: Notch signaling pathway, 04350: TGF-beta signaling pathway, 04520: Adherens junction, 04630: Jak-STAT signaling pathway, 04720: Long-term potentiation, 04916: Melanogenesis, 05040: Huntington''s disease'	0.74169	7.09685	7.10011	0.00326674
'EP400'	'00500: Starch and sucrose metabolism, 00790: Folate biosynthesis'	0.831108	7.10822	7.10946	0.00124286
'EPB41'	'04530: Tight junction'	0.180944	7.01997	7.01144	-0.00853185
'EPB41L1'	'04530: Tight junction'	0.573921	7.08987	7.09285	0.00298221
'EPB41L2'	'04530: Tight junction'	0.304126	7.00031	7.01201	0.0117008
'EPB41L3'	'04530: Tight junction'	0.547797	7.15611	7.15859	0.0024811
'EPHA1'	'04360: Axon guidance'	0.547797	7.0646	7.06374	-0.000857227
'EPHA2'	'04360: Axon guidance'	0.683881	7.04353	7.05116	0.007628
'EPHA3'	'04360: Axon guidance'	0.547797	7.05232	7.06264	0.0103197
'EPHA4'	'04360: Axon guidance'	0.800995	6.91108	6.90123	-0.00984241
'EPHA5'	'04360: Axon guidance'	0.0844129	7.04576	7.05941	0.0136535
'EPHA6'	'04360: Axon guidance'	0.922769	7.06232	7.06135	-0.000975962
'EPHA7'	'04360: Axon guidance'	0.771176	7.06348	7.0633	-0.000182224
'EPHA8'	'04360: Axon guidance'	0.207563	7.05553	7.06256	0.00703275
'EPHB1'	'04360: Axon guidance'	0.0916307	7.06264	7.07165	0.00900951
'EPHB2'	'04360: Axon guidance'	0.861471	7.0714	7.07283	0.00143014
'EPHB3'	'04360: Axon guidance'	0.627868	6.98556	7.00211	0.016544
'EPHB4'	'04360: Axon guidance'	0.800995	6.95777	6.96928	0.0115123
'EPHB6'	'04360: Axon guidance'	0.984531	7.02828	7.02894	0.000655046
'EPO'	'04060: Cytokine-cytokine receptor interaction, 04630: Jak-STAT signaling pathway, 04640: Hematopoietic cell lineage'	0.304126	7.0763	7.08036	0.00405351
'EPOR'	'04060: Cytokine-cytokine receptor interaction, 04630: Jak-STAT signaling pathway, 04640: Hematopoietic cell lineage'	0.861471	7.05864	7.05804	-0.000595427
'EPRS'	'00251: Glutamate metabolism, 00330: Arginine and proline metabolism, 00860: Porphyrin and chlorophyll metabolism, 00970: Aminoacyl-tRNA biosynthesis'	0.22189	6.95712	6.95112	-0.00600033
'EPX'	'00360: Phenylalanine metabolism, 00680: Methane metabolism, 00940: Stilbene, coumarine and lignin biosynthesis'	0.342077	7.04906	7.05255	0.00348493
'ERBB2'	'04020: Calcium signaling pathway, 04320: Dorso-ventral axis formation, 04510: Focal adhesion, 04520: Adherens junction, 05212: Pancreatic cancer'	0.116294	7.12536	7.13963	0.0142713
'ERBB3'	'04020: Calcium signaling pathway'	0.286241	7.08861	7.07663	-0.0119798
'ERBB4'	'04020: Calcium signaling pathway, 04320: Dorso-ventral axis formation'	0.193918	7.08027	7.09305	0.0127851
'ERCC2'	'00500: Starch and sucrose metabolism, 00790: Folate biosynthesis'	0.342077	7.04657	7.05103	0.0044547
'ERCC3'	'00500: Starch and sucrose metabolism, 00790: Folate biosynthesis'	0.497378	6.98797	6.98907	0.00110143
'ERO1L'	'05110: Cholera - Infection'	0.953615	7.01241	7.01187	-0.000544004
'ESCO1'	'00280: Valine, leucine and isoleucine degradation, 00350: Tyrosine metabolism, 00360: Phenylalanine metabolism, 00564: Glycerophospholipid metabolism, 00624: 1- and 2-Methylnaphthalene degradation, 00632: Benzoate degradation via CoA ligation, 00642: Ethylbenzene degradation, 00903: Limonene and pinene degradation, 00960: Alkaloid biosynthesis II'	0.0549176	6.98898	7.01263	0.0236498
'ESCO2'	'00280: Valine, leucine and isoleucine degradation, 00350: Tyrosine metabolism, 00360: Phenylalanine metabolism, 00564: Glycerophospholipid metabolism, 00624: 1- and 2-Methylnaphthalene degradation, 00632: Benzoate degradation via CoA ligation, 00642: Ethylbenzene degradation, 00903: Limonene and pinene degradation, 00960: Alkaloid biosynthesis II'	0.26908	7.06424	7.06718	0.0029382
'ETS1'	'04320: Dorso-ventral axis formation'	0.953615	7.04854	7.04723	-0.00131155
'ETS2'	'04320: Dorso-ventral axis formation'	0.800995	6.98312	6.97347	-0.00964326
'ETV6'	'04320: Dorso-ventral axis formation'	0.522275	7.19748	7.20022	0.00274151
'EXOC3'	'04530: Tight junction'	0.600621	7.10868	7.10424	-0.00443577
'EXOC4'	'04530: Tight junction'	0.600621	7.22691	7.22993	0.00301905
'EXOC7'	'04910: Insulin signaling pathway'	0.107551	7.13449	7.14157	0.00708551
'EXT1'	'00534: Heparan sulfate biosynthesis, 01030: Glycan structures - biosynthesis 1'	0.286241	6.95889	6.97454	0.0156449
'EXT2'	'00534: Heparan sulfate biosynthesis, 01030: Glycan structures - biosynthesis 1'	0.426639	6.95058	6.95588	0.00529255
'EXTL3'	'00534: Heparan sulfate biosynthesis, 01030: Glycan structures - biosynthesis 1'	0.449543	7.02246	7.03124	0.00878277
'F10'	'04610: Complement and coagulation cascades'	0.922769	7.0692	7.06625	-0.00295034
'F11'	'04610: Complement and coagulation cascades'	0.627868	7.07217	7.07301	0.000842759
'F11R'	'04514: Cell adhesion molecules (CAMs), 04530: Tight junction, 04670: Leukocyte transendothelial migration, 05120: Epithelial cell signaling in Helicobacter pylori infection'	0.573921	6.99623	6.98848	-0.00774559
'F12'	'04610: Complement and coagulation cascades'	0.168626	7.0518	7.03814	-0.013658
'F13A1'	'04610: Complement and coagulation cascades'	0.362142	6.96887	6.98694	0.0180692
'F13B'	'04610: Complement and coagulation cascades'	0.0993364	7.05229	7.06836	0.0160705
'F2'	'04080: Neuroactive ligand-receptor interaction, 04610: Complement and coagulation cascades, 04810: Regulation of actin cytoskeleton'	0.800995	7.10624	7.1027	-0.00354169
'F2R'	'04020: Calcium signaling pathway, 04080: Neuroactive ligand-receptor interaction, 04610: Complement and coagulation cascades, 04810: Regulation of actin cytoskeleton'	0.522275	7.01478	7.00038	-0.0144029
'F2RL1'	'04080: Neuroactive ligand-receptor interaction'	0.404431	7.0668	7.06537	-0.00142284
'F2RL2'	'04080: Neuroactive ligand-receptor interaction'	0.573921	7.08218	7.0848	0.0026205
'F2RL3'	'04080: Neuroactive ligand-receptor interaction'	0.449543	7.06432	7.07212	0.00779639
'F3'	'04610: Complement and coagulation cascades'	0.236912	7.04954	7.00455	-0.0449925
'F5'	'04610: Complement and coagulation cascades'	0.156949	7.06157	7.07666	0.0150886
'F7'	'04610: Complement and coagulation cascades'	0.522275	7.06397	7.06678	0.00280858
'F8'	'04610: Complement and coagulation cascades'	1	6.98064	6.97896	-0.00168297
'F9'	'04610: Complement and coagulation cascades'	0.125586	7.06346	7.07323	0.00976351
'FABP1'	'03320: PPAR signaling pathway'	0.304126	7.08512	7.09142	0.00629816
'FABP3'	'03320: PPAR signaling pathway'	0.00991558	7.04982	7.07155	0.021731
'FABP4'	'03320: PPAR signaling pathway'	1	7.04902	7.04625	-0.00277108
'FABP5'	'03320: PPAR signaling pathway'	0.0313818	6.89899	6.86623	-0.0327668
'FABP6'	'03320: PPAR signaling pathway'	0.627868	7.06383	7.07151	0.00767986
'FADD'	'04210: Apoptosis, 04620: Toll-like receptor signaling pathway'	0.193918	6.99919	6.99247	-0.00671928
'FADS1'	'00591: Linoleic acid metabolism'	0.600621	6.86314	6.86727	0.00412782
'FAH'	'00350: Tyrosine metabolism, 00643: Styrene degradation'	0.74169	7.04334	7.04295	-0.000390328
'FANCL'	'00380: Tryptophan metabolism'	0.984531	6.98268	6.9814	-0.0012757
'FARP2'	'04510: Focal adhesion, 04520: Adherens junction'	0.060006	7.03503	7.0461	0.0110672
'FARS2'	'00400: Phenylalanine, tyrosine and tryptophan biosynthesis, 00970: Aminoacyl-tRNA biosynthesis'	0.0153656	7.08611	7.1006	0.0144899
'FARSA'	'00400: Phenylalanine, tyrosine and tryptophan biosynthesis, 00970: Aminoacyl-tRNA biosynthesis'	0.382929	6.95816	6.94835	-0.00980905
'FARSB'	'00400: Phenylalanine, tyrosine and tryptophan biosynthesis, 00970: Aminoacyl-tRNA biosynthesis'	0.304126	6.9647	6.95438	-0.0103162
'FAS'	'04010: MAPK signaling pathway, 04060: Cytokine-cytokine receptor interaction, 04210: Apoptosis, 04650: Natural killer cell mediated cytotoxicity, 04940: Type I diabetes mellitus'	0.0776622	7.05143	7.06578	0.0143452
'FASLG'	'04010: MAPK signaling pathway, 04060: Cytokine-cytokine receptor interaction, 04210: Apoptosis, 04650: Natural killer cell mediated cytotoxicity, 04940: Type I diabetes mellitus'	0.342077	7.09569	7.10987	0.0141798
'FASN'	'00061: Fatty acid biosynthesis, 04910: Insulin signaling pathway'	0.107551	7.19414	7.18412	-0.0100223
'FAU'	'03010: Ribosome'	0.286241	6.7292	6.69334	-0.0358687
'FBP1'	'00010: Glycolysis / Gluconeogenesis, 00030: Pentose phosphate pathway, 00051: Fructose and mannose metabolism, 00710: Carbon fixation, 04910: Insulin signaling pathway'	0.0380198	7.04333	6.99351	-0.0498216
'FBXO18'	'00500: Starch and sucrose metabolism, 00790: Folate biosynthesis'	0.473128	7.01257	7.01639	0.00381717
'FBXW11'	'04120: Ubiquitin mediated proteolysis, 04310: Wnt signaling pathway, 04340: Hedgehog signaling pathway'	0.600621	7.01642	7.00136	-0.0150563
'FBXW7'	'01510: Neurodegenerative Disorders, 04120: Ubiquitin mediated proteolysis'	0.107551	7.00665	7.01343	0.00678294
'FCER1A'	'04664: Fc epsilon RI signaling pathway'	0.382929	7.08014	7.08215	0.00201687
'FCER1G'	'04650: Natural killer cell mediated cytotoxicity, 04664: Fc epsilon RI signaling pathway'	0.342077	7.0175	7.03081	0.0133105
'FCER2'	'04640: Hematopoietic cell lineage'	0.404431	7.06973	7.07856	0.00882631
'FCGR1A'	'04640: Hematopoietic cell lineage'	0.193918	7.06029	7.07299	0.012706
'FCGR2B'	'04662: B cell receptor signaling pathway'	0.236912	7.05826	7.05366	-0.00460239
'FDFT1'	'00100: Biosynthesis of steroids, 00900: Terpenoid biosynthesis'	0.404431	7.04567	7.03082	-0.0148516
'FDPS'	'00100: Biosynthesis of steroids, 00900: Terpenoid biosynthesis'	0.497378	6.9525	6.93236	-0.0201348
'FECH'	'00860: Porphyrin and chlorophyll metabolism'	0.922769	7.00299	7.00103	-0.00195169
'FER'	'04520: Adherens junction'	0.655633	7.0521	7.05299	0.000892582
'FES'	'04360: Axon guidance'	0.0776622	7.03313	7.0557	0.0225729
'FGA'	'04610: Complement and coagulation cascades'	0.800995	7.12352	7.12608	0.00255865
'FGB'	'04610: Complement and coagulation cascades'	0.26908	7.07709	7.0853	0.00821217
'FGD1'	'04810: Regulation of actin cytoskeleton'	0.861471	7.00886	7.01173	0.00286677
'FGF1'	'04010: MAPK signaling pathway, 04810: Regulation of actin cytoskeleton, 05218: Melanoma'	0.236912	7.06519	7.06963	0.00443992
'FGF10'	'04010: MAPK signaling pathway, 04810: Regulation of actin cytoskeleton, 05218: Melanoma'	0.180944	7.06502	7.07362	0.00859574
'FGF13'	'04010: MAPK signaling pathway, 04810: Regulation of actin cytoskeleton, 05218: Melanoma'	0.0776622	6.94858	6.88829	-0.0602823
'FGF17'	'04010: MAPK signaling pathway, 04810: Regulation of actin cytoskeleton, 05218: Melanoma'	0.497378	7.05965	7.06362	0.00396764
'FGF18'	'04010: MAPK signaling pathway, 04810: Regulation of actin cytoskeleton, 05218: Melanoma'	0.116294	7.05699	7.07165	0.0146627
'FGF19'	'04010: MAPK signaling pathway, 04810: Regulation of actin cytoskeleton, 05218: Melanoma'	0.627868	7.06632	7.07128	0.00495804
'FGF2'	'04010: MAPK signaling pathway, 04810: Regulation of actin cytoskeleton, 05218: Melanoma'	0.0654794	7.07401	7.08808	0.0140682
'FGF23'	'04010: MAPK signaling pathway, 04810: Regulation of actin cytoskeleton, 05218: Melanoma'	0.426639	7.06882	7.05966	-0.00915655
'FGF3'	'04010: MAPK signaling pathway, 04810: Regulation of actin cytoskeleton, 05218: Melanoma'	0.322738	7.07053	7.07361	0.00307772
'FGF4'	'04010: MAPK signaling pathway, 04810: Regulation of actin cytoskeleton, 05218: Melanoma'	0.984531	7.06236	7.06546	0.00309966
'FGF5'	'04010: MAPK signaling pathway, 04810: Regulation of actin cytoskeleton, 05218: Melanoma'	0.362142	7.06523	7.07354	0.00830763
'FGF6'	'04010: MAPK signaling pathway, 04810: Regulation of actin cytoskeleton, 05218: Melanoma'	0.627868	7.04411	7.03667	-0.00743761
'FGF7'	'04010: MAPK signaling pathway, 04810: Regulation of actin cytoskeleton, 05218: Melanoma'	0.449543	7.06761	7.07396	0.00634582
'FGF8'	'04010: MAPK signaling pathway, 04810: Regulation of actin cytoskeleton, 05218: Melanoma'	0.404431	7.06651	7.06176	-0.00475286
'FGF9'	'04010: MAPK signaling pathway, 04810: Regulation of actin cytoskeleton, 05218: Melanoma'	0.168626	7.05641	7.04537	-0.0110388
'FGFR1'	'04010: MAPK signaling pathway, 04520: Adherens junction, 04810: Regulation of actin cytoskeleton, 05218: Melanoma'	0.497378	6.99373	7.01266	0.0189305
'FGFR2'	'04010: MAPK signaling pathway, 04810: Regulation of actin cytoskeleton'	0.861471	7.08977	7.09062	0.000851909
'FGFR3'	'04010: MAPK signaling pathway, 04810: Regulation of actin cytoskeleton'	0.922769	7.06074	7.06168	0.000939356
'FGFR4'	'04010: MAPK signaling pathway, 04810: Regulation of actin cytoskeleton'	0.627868	7.08204	7.08369	0.00165026
'FGG'	'04610: Complement and coagulation cascades'	0.712579	7.04374	7.0279	-0.0158377
'FH'	'00020: Citrate cycle (TCA cycle), 00720: Reductive carboxylate cycle (CO2 fixation)'	0.0844129	6.97597	6.96062	-0.0153576
'FHIT'	'00230: Purine metabolism'	0.193918	7.04718	7.05554	0.00836179
'FIGF'	'04150: mTOR signaling pathway, 04510: Focal adhesion, 05212: Pancreatic cancer'	0.045816	7.06652	7.04387	-0.0226449
'FLAD1'	'00740: Riboflavin metabolism'	0.236912	7.02166	7.01209	-0.00956688
'FLNA'	'04010: MAPK signaling pathway, 04510: Focal adhesion'	0.207563	7.13909	7.12481	-0.0142777
'FLNB'	'04010: MAPK signaling pathway, 04510: Focal adhesion'	0.22189	7.06957	7.08133	0.0117651
'FLNC'	'04010: MAPK signaling pathway, 04510: Focal adhesion'	0.125586	7.12207	7.13654	0.0144716
'FLOT1'	'04910: Insulin signaling pathway'	0.953615	6.99689	7.01066	0.0137703
'FLOT2'	'04910: Insulin signaling pathway'	0.984531	7.00546	7.00421	-0.00124573
'FLT1'	'04060: Cytokine-cytokine receptor interaction, 04510: Focal adhesion'	0.207563	7.03065	7.05254	0.0218941
'FLT3'	'04060: Cytokine-cytokine receptor interaction, 04640: Hematopoietic cell lineage'	0.0210375	7.06126	7.07535	0.0140835
'FLT3LG'	'04060: Cytokine-cytokine receptor interaction, 04640: Hematopoietic cell lineage'	0.984531	7.06637	7.06613	-0.000236173
'FLT4'	'04060: Cytokine-cytokine receptor interaction'	0.25264	7.06512	7.08181	0.016684
'FN1'	'01430: Cell Communication, 04510: Focal adhesion, 04512: ECM-receptor interaction, 04810: Regulation of actin cytoskeleton'	0.473128	7.02168	7.0124	-0.00927158
'FNDC5'	'04512: ECM-receptor interaction'	0.404431	7.04164	7.04814	0.0065043
'FOS'	'04010: MAPK signaling pathway, 04620: Toll-like receptor signaling pathway, 04660: T cell receptor signaling pathway, 04662: B cell receptor signaling pathway, 05210: Colorectal cancer'	0.922769	6.98834	7.00356	0.0152197
'FOSL1'	'04310: Wnt signaling pathway'	0.449543	7.09518	7.0974	0.00221497
'FOXA2'	'04950: Maturity onset diabetes of the young'	0.449543	7.08612	7.07215	-0.0139772
'FOXA3'	'04950: Maturity onset diabetes of the young'	1	7.05863	7.06415	0.00551676
'FPR1'	'04080: Neuroactive ligand-receptor interaction'	0.984531	7.05547	7.05161	-0.00385992
'FRAT1'	'04310: Wnt signaling pathway'	0.953615	7.02133	7.0211	-0.000231641
'FRAT2'	'04310: Wnt signaling pathway'	0.449543	7.0156	7.01506	-0.000541227
'FSHB'	'04080: Neuroactive ligand-receptor interaction, 04912: GnRH signaling pathway'	0.522275	7.06202	7.06884	0.00682462
'FSHR'	'04080: Neuroactive ligand-receptor interaction'	0.74169	7.06658	7.07316	0.00658819
'FST'	'04350: TGF-beta signaling pathway'	0.892039	7.04782	7.04233	-0.00549207
'FTH1'	'00860: Porphyrin and chlorophyll metabolism'	0.522275	6.82201	6.82647	0.00445607
'FUT1'	'00601: Glycosphingolipid biosynthesis - lactoseries, 00602: Glycosphingolipid biosynthesis - neo-lactoseries, 00603: Glycosphingolipid biosynthesis - globoseries, 01031: Glycan structures - biosynthesis 2'	0.800995	7.01315	7.01579	0.00264062
'FUT4'	'00602: Glycosphingolipid biosynthesis - neo-lactoseries, 01031: Glycan structures - biosynthesis 2'	0.322738	7.02565	7.02781	0.00216272
'FYN'	'04360: Axon guidance, 04510: Focal adhesion, 04520: Adherens junction, 04650: Natural killer cell mediated cytotoxicity, 04660: T cell receptor signaling pathway, 04664: Fc epsilon RI signaling pathway, 05130: Pathogenic Escherichia coli infection - EHEC, 05131: Pathogenic Escherichia coli infection - EPEC'	0.00885667	7.1797	7.19688	0.0171811
'FZD1'	'04310: Wnt signaling pathway, 04916: Melanogenesis, 05210: Colorectal cancer, 05217: Basal cell carcinoma'	0.473128	6.94945	6.96132	0.0118704
'FZD10'	'04310: Wnt signaling pathway, 04916: Melanogenesis, 05210: Colorectal cancer, 05217: Basal cell carcinoma'	0.712579	7.05244	7.05117	-0.00127478
'FZD2'	'04310: Wnt signaling pathway, 04916: Melanogenesis, 05210: Colorectal cancer, 05217: Basal cell carcinoma'	0.0654794	6.94886	6.91996	-0.0288999
'FZD4'	'04310: Wnt signaling pathway, 04916: Melanogenesis, 05210: Colorectal cancer, 05217: Basal cell carcinoma'	0.497378	7.0132	7.02225	0.00905364
'FZD5'	'04310: Wnt signaling pathway, 04916: Melanogenesis, 05210: Colorectal cancer, 05217: Basal cell carcinoma'	0.156949	7.06539	7.05567	-0.00972526
'FZD6'	'04310: Wnt signaling pathway, 04916: Melanogenesis, 05210: Colorectal cancer, 05217: Basal cell carcinoma'	0.180944	7.02001	7.00674	-0.0132706
'FZD7'	'04310: Wnt signaling pathway, 04916: Melanogenesis, 05210: Colorectal cancer, 05217: Basal cell carcinoma'	1	6.92978	6.94085	0.0110774
'FZD8'	'04310: Wnt signaling pathway, 04916: Melanogenesis, 05210: Colorectal cancer, 05217: Basal cell carcinoma'	0.771176	6.9948	6.98646	-0.00834328
'FZD9'	'04310: Wnt signaling pathway, 04916: Melanogenesis, 05210: Colorectal cancer, 05217: Basal cell carcinoma'	0.522275	7.06247	7.076	0.0135336
'FZR1'	'04110: Cell cycle, 04120: Ubiquitin mediated proteolysis'	0.22189	7.14599	7.15129	0.0053072
'G6PC'	'00010: Glycolysis / Gluconeogenesis, 00052: Galactose metabolism, 00500: Starch and sucrose metabolism, 04910: Insulin signaling pathway, 04920: Adipocytokine signaling pathway'	0.547797	7.0645	7.06684	0.00234709
'G6PD'	'00030: Pentose phosphate pathway, 00480: Glutathione metabolism'	0.922769	7.06894	7.06665	-0.00229396
'GAA'	'00052: Galactose metabolism, 00500: Starch and sucrose metabolism'	0.0776622	6.95772	6.97799	0.0202635
'GAB2'	'04664: Fc epsilon RI signaling pathway, 05220: Chronic myeloid leukemia'	0.382929	7.12965	7.13459	0.00494292
'GABARAP'	'04140: Regulation of autophagy'	0.573921	6.78788	6.78205	-0.00582824
'GABARAPL1'	'04140: Regulation of autophagy'	0.449543	6.99684	6.98765	-0.00918581
'GABBR1'	'04080: Neuroactive ligand-receptor interaction'	0.522275	7.03366	7.03586	0.00220348
'GABBR2'	'04080: Neuroactive ligand-receptor interaction'	0.342077	7.06155	7.05836	-0.00318921
'GABRA1'	'04080: Neuroactive ligand-receptor interaction'	0.831108	7.08123	7.08286	0.0016269
'GABRA3'	'04080: Neuroactive ligand-receptor interaction'	0.573921	7.06881	7.07462	0.00580504
'GABRA4'	'04080: Neuroactive ligand-receptor interaction'	0.800995	7.06179	7.06243	0.000633502
'GABRA6'	'04080: Neuroactive ligand-receptor interaction'	0.683881	7.06285	7.0595	-0.0033498
'GABRB1'	'04080: Neuroactive ligand-receptor interaction'	0.426639	7.05366	7.06343	0.00976938
'GABRB2'	'04080: Neuroactive ligand-receptor interaction'	0.00556017	7.06072	7.07539	0.0146663
'GABRB3'	'04080: Neuroactive ligand-receptor interaction'	0.207563	7.05395	7.01924	-0.0347108
'GABRG1'	'04080: Neuroactive ligand-receptor interaction'	0.712579	7.0685	7.05902	-0.0094718
'GABRG2'	'04080: Neuroactive ligand-receptor interaction'	0.771176	7.07009	7.07651	0.00641874
'GABRG3'	'04080: Neuroactive ligand-receptor interaction'	0.180944	7.06914	7.07719	0.00805027
'GABRQ'	'04080: Neuroactive ligand-receptor interaction'	0.404431	7.06129	7.06989	0.00859574
'GABRR1'	'04080: Neuroactive ligand-receptor interaction'	0.0549176	7.1169	7.13869	0.0217846
'GABRR2'	'04080: Neuroactive ligand-receptor interaction'	0.342077	7.04396	7.06643	0.0224793
'GAD1'	'00251: Glutamate metabolism, 00252: Alanine and aspartate metabolism, 00410: beta-Alanine metabolism, 00430: Taurine and hypotaurine metabolism, 00650: Butanoate metabolism, 04940: Type I diabetes mellitus'	0.207563	7.06872	7.07506	0.00633426
'GAD2'	'00251: Glutamate metabolism, 00252: Alanine and aspartate metabolism, 00410: beta-Alanine metabolism, 00430: Taurine and hypotaurine metabolism, 00650: Butanoate metabolism, 04940: Type I diabetes mellitus'	0.547797	7.06595	7.06811	0.00216388
'GADD45A'	'04010: MAPK signaling pathway, 04110: Cell cycle'	0.322738	6.95135	6.95611	0.00475232
'GADD45B'	'04010: MAPK signaling pathway, 04110: Cell cycle'	0.497378	7.01461	7.02156	0.00695239
'GADD45G'	'04010: MAPK signaling pathway, 04110: Cell cycle'	0.800995	7.04144	7.04877	0.00733446
'GAL'	'04080: Neuroactive ligand-receptor interaction'	0.0844129	7.05412	7.03933	-0.014788
'GAL3ST1'	'00600: Sphingolipid metabolism'	0.547797	7.06227	7.07134	0.00906827
'GALNS'	'00531: Glycosaminoglycan degradation, 01032: Glycan structures - degradation'	0.892039	7.03869	7.03696	-0.00173192
'GALNT1'	'00512: O-Glycan biosynthesis, 01030: Glycan structures - biosynthesis 1'	0.497378	6.94003	6.95095	0.0109128
'GALNT4'	'00512: O-Glycan biosynthesis, 01030: Glycan structures - biosynthesis 1'	0.861471	7.05742	7.05755	0.000123261
'GALNT5'	'00512: O-Glycan biosynthesis, 01030: Glycan structures - biosynthesis 1'	0.922769	7.05318	7.05022	-0.00295688
'GALR1'	'04080: Neuroactive ligand-receptor interaction'	0.683881	7.05935	7.05619	-0.00316314
'GALR2'	'04080: Neuroactive ligand-receptor interaction'	0.892039	7.06305	7.0619	-0.00114741
'GANAB'	'00510: N-Glycan biosynthesis, 01030: Glycan structures - biosynthesis 1'	0.547797	6.91663	6.89917	-0.0174662
'GAPDH'	'00010: Glycolysis / Gluconeogenesis, 01510: Neurodegenerative Disorders, 05010: Alzheimer''s disease, 05040: Huntington''s disease, 05050: Dentatorubropallidoluysian atrophy (DRPLA)'	0.449543	7.13864	7.13938	0.0007411
'GARS'	'00260: Glycine, serine and threonine metabolism, 00970: Aminoacyl-tRNA biosynthesis'	0.655633	6.87501	6.86314	-0.0118668
'GART'	'00230: Purine metabolism, 00670: One carbon pool by folate'	0.426639	6.9818	6.97613	-0.00566732
'GAS1'	'04340: Hedgehog signaling pathway'	0.362142	6.98474	6.94118	-0.0435538
'GBA'	'00460: Cyanoamino acid metabolism, 00500: Starch and sucrose metabolism, 00600: Sphingolipid metabolism, 00940: Stilbene, coumarine and lignin biosynthesis, 01032: Glycan structures - degradation'	0.0549176	7.01918	7.03239	0.0132073
'GBE1'	'00500: Starch and sucrose metabolism'	0.0417641	6.94536	6.96927	0.0239071
'GCG'	'04080: Neuroactive ligand-receptor interaction'	0.953615	7.06946	7.06243	-0.0070269
'GCGR'	'04080: Neuroactive ligand-receptor interaction'	0.984531	7.06687	7.06889	0.0020221
'GCK'	'00010: Glycolysis / Gluconeogenesis, 00052: Galactose metabolism, 00500: Starch and sucrose metabolism, 00521: Streptomycin biosynthesis, 04910: Insulin signaling pathway, 04930: Type II diabetes mellitus, 04950: Maturity onset diabetes of the young'	0.404431	7.07111	7.07815	0.00704028
'GDF5'	'04060: Cytokine-cytokine receptor interaction, 04350: TGF-beta signaling pathway'	0.497378	7.05038	7.05396	0.00358089
'GFAP'	'01510: Neurodegenerative Disorders, 05060: Prion disease'	0.449543	7.11956	7.12169	0.00213024
'GFPT1'	'00251: Glutamate metabolism, 00530: Aminosugars metabolism'	0.984531	7.0749	7.08072	0.00581896
'GGH'	'00790: Folate biosynthesis'	0.655633	6.89621	6.89298	-0.00322339
'GH1'	'04060: Cytokine-cytokine receptor interaction, 04080: Neuroactive ligand-receptor interaction, 04630: Jak-STAT signaling pathway'	0.800995	7.06703	7.07458	0.00755009
'GHR'	'04060: Cytokine-cytokine receptor interaction, 04080: Neuroactive ligand-receptor interaction, 04630: Jak-STAT signaling pathway'	0.25264	7.06757	7.06668	-0.000887168
'GHRH'	'04080: Neuroactive ligand-receptor interaction'	0.573921	7.05781	7.04705	-0.0107605
'GHRHR'	'04080: Neuroactive ligand-receptor interaction'	0.683881	7.06548	7.0689	0.00342024
'GHRL'	'04080: Neuroactive ligand-receptor interaction'	0.497378	7.05368	7.05728	0.00360344
'GHSR'	'04080: Neuroactive ligand-receptor interaction'	0.382929	7.06564	7.07177	0.00612455
'GIP'	'04080: Neuroactive ligand-receptor interaction'	0.0844129	7.06068	7.07238	0.0116941
'GIPR'	'04080: Neuroactive ligand-receptor interaction'	0.382929	7.05889	7.04874	-0.0101453
'GIT1'	'04810: Regulation of actin cytoskeleton, 05120: Epithelial cell signaling in Helicobacter pylori infection'	0.449543	7.06581	7.07055	0.00473769
'GJA1'	'01430: Cell Communication, 04540: Gap junction'	0.712579	6.83945	6.86024	0.0207921
'GJA3'	'01430: Cell Communication'	0.145894	7.06056	7.06706	0.00649695
'GJA5'	'01430: Cell Communication'	0.26908	7.04491	7.05891	0.0139997
'GJA8'	'01430: Cell Communication'	1	7.06111	7.06551	0.0044039
'GJB1'	'01430: Cell Communication'	0.0549176	7.05322	7.0706	0.0173826
'GJB2'	'01430: Cell Communication'	0.831108	7.05565	7.05287	-0.00277087
'GJB6'	'01430: Cell Communication'	0.0232968	7.0592	7.04368	-0.0155191
'GJC1'	'01430: Cell Communication'	0.0380198	7.03308	7.04078	0.00769464
'GK'	'00561: Glycerolipid metabolism, 03320: PPAR signaling pathway'	0.712579	7.05749	7.05251	-0.00498203
'GLB1'	'00052: Galactose metabolism, 00511: N-Glycan degradation, 00531: Glycosaminoglycan degradation, 00561: Glycerolipid metabolism, 00600: Sphingolipid metabolism, 00604: Glycosphingolipid biosynthesis - ganglioseries, 01032: Glycan structures - degradation'	0.861471	6.99437	6.99201	-0.00235546
'GLDC'	'00260: Glycine, serine and threonine metabolism'	0.655633	7.09779	7.10763	0.00984213
'GLG1'	'04514: Cell adhesion molecules (CAMs)'	0.627868	6.78259	6.7743	-0.0082845
'GLI1'	'04340: Hedgehog signaling pathway, 05217: Basal cell carcinoma'	0.404431	7.00691	7.01695	0.010035
'GLI2'	'04340: Hedgehog signaling pathway, 05217: Basal cell carcinoma'	0.712579	7.03827	7.04619	0.00792165
'GLI3'	'04340: Hedgehog signaling pathway, 05217: Basal cell carcinoma'	0.712579	7.02078	7.01262	-0.00815518
'GLP1R'	'04080: Neuroactive ligand-receptor interaction'	0.984531	7.05783	7.05696	-0.000870536
'GLRA1'	'04080: Neuroactive ligand-receptor interaction'	0.473128	7.06376	7.05761	-0.00615781
'GLS'	'00251: Glutamate metabolism, 00471: D-Glutamine and D-glutamate metabolism, 00910: Nitrogen metabolism'	0.800995	7.01905	7.01741	-0.00164002
'GLS2'	'00251: Glutamate metabolism, 00471: D-Glutamine and D-glutamate metabolism, 00910: Nitrogen metabolism'	0.771176	7.06568	7.06704	0.00136532
'GLUD1'	'00251: Glutamate metabolism, 00330: Arginine and proline metabolism, 00471: D-Glutamine and D-glutamate metabolism, 00910: Nitrogen metabolism'	0.0417641	7.06699	7.07516	0.00817174
'GLUL'	'00251: Glutamate metabolism, 00550: Peptidoglycan biosynthesis, 00910: Nitrogen metabolism'	0.449543	6.95174	6.94775	-0.00399397
'GMPS'	'00230: Purine metabolism, 00251: Glutamate metabolism'	0.362142	7.03336	7.02986	-0.00349592
'GNA11'	'04020: Calcium signaling pathway, 04540: Gap junction, 04730: Long-term depression, 04912: GnRH signaling pathway'	0.180944	6.98326	6.98768	0.00441584
'GNA12'	'04010: MAPK signaling pathway, 04730: Long-term depression, 04810: Regulation of actin cytoskeleton'	0.0232968	7.02155	7.0404	0.0188509
'GNA13'	'04730: Long-term depression, 04810: Regulation of actin cytoskeleton'	0.74169	7.07627	7.08349	0.00722055
'GNA14'	'04020: Calcium signaling pathway'	0.892039	7.16441	7.16407	-0.000343546
'GNA15'	'04020: Calcium signaling pathway'	0.236912	7.03345	7.04104	0.00759683
'GNAI1'	'04360: Axon guidance, 04530: Tight junction, 04540: Gap junction, 04670: Leukocyte transendothelial migration, 04730: Long-term depression, 04916: Melanogenesis'	0.892039	7.08783	7.07927	-0.00856446
'GNAI2'	'04360: Axon guidance, 04530: Tight junction, 04540: Gap junction, 04670: Leukocyte transendothelial migration, 04730: Long-term depression, 04916: Melanogenesis'	0.045816	7.08244	7.10239	0.0199498
'GNAI3'	'04360: Axon guidance, 04530: Tight junction, 04540: Gap junction, 04670: Leukocyte transendothelial migration, 04730: Long-term depression, 04916: Melanogenesis'	0.831108	6.99265	6.98218	-0.010473
'GNAO1'	'04730: Long-term depression, 04916: Melanogenesis'	0.426639	7.07439	7.08928	0.0148863
'GNAQ'	'04020: Calcium signaling pathway, 04540: Gap junction, 04720: Long-term potentiation, 04730: Long-term depression, 04912: GnRH signaling pathway, 04916: Melanogenesis'	0.573921	7.02078	7.01364	-0.00714348
'GNAS'	'04020: Calcium signaling pathway, 04540: Gap junction, 04730: Long-term depression, 04742: Taste transduction, 04912: GnRH signaling pathway, 04916: Melanogenesis, 05110: Cholera - Infection'	0.627868	7.09469	7.08455	-0.0101412
'GNAT3'	'04742: Taste transduction'	0.522275	7.05627	7.06588	0.0096104
'GNAZ'	'04730: Long-term depression'	0.922769	7.01877	7.01432	-0.00444355
'GNB3'	'04742: Taste transduction'	0.236912	7.12728	7.13652	0.00923401
'GNG12'	'04010: MAPK signaling pathway, 04810: Regulation of actin cytoskeleton'	0.168626	7.0193	7.03259	0.0132976
'GNG13'	'04742: Taste transduction'	0.168626	7.06114	7.071	0.00986406
'GNMT'	'00260: Glycine, serine and threonine metabolism'	0.892039	7.0586	7.05605	-0.00254675
'GNPAT'	'00564: Glycerophospholipid metabolism'	0.25264	6.96087	6.9477	-0.013169
'GNRH1'	'04080: Neuroactive ligand-receptor interaction, 04912: GnRH signaling pathway'	0.045816	7.01947	7.03867	0.0191935
'GNRHR'	'04080: Neuroactive ligand-receptor interaction, 04912: GnRH signaling pathway'	0.25264	7.05511	7.06538	0.0102676
'GNS'	'00531: Glycosaminoglycan degradation, 01032: Glycan structures - degradation'	0.800995	6.93921	6.95026	0.0110503
'GOSR1'	'04130: SNARE interactions in vesicular transport'	0.25264	6.96659	6.97915	0.0125582
'GOSR2'	'04130: SNARE interactions in vesicular transport'	0.522275	7.01745	7.02283	0.00537431
'GOT1'	'00251: Glutamate metabolism, 00252: Alanine and aspartate metabolism, 00272: Cysteine metabolism, 00330: Arginine and proline metabolism, 00350: Tyrosine metabolism, 00360: Phenylalanine metabolism, 00400: Phenylalanine, tyrosine and tryptophan biosynthesis, 00401: Novobiocin biosynthesis, 00710: Carbon fixation, 00950: Alkaloid biosynthesis I'	0.322738	7.0455	7.05871	0.0132144
'GOT2'	'00251: Glutamate metabolism, 00252: Alanine and aspartate metabolism, 00272: Cysteine metabolism, 00330: Arginine and proline metabolism, 00350: Tyrosine metabolism, 00360: Phenylalanine metabolism, 00400: Phenylalanine, tyrosine and tryptophan biosynthesis, 00401: Novobiocin biosynthesis, 00710: Carbon fixation, 00950: Alkaloid biosynthesis I'	0.712579	6.92023	6.93587	0.0156435
'GP1BA'	'04512: ECM-receptor interaction, 04640: Hematopoietic cell lineage'	0.168626	7.04603	7.05588	0.00984307
'GP1BB'	'04512: ECM-receptor interaction, 04640: Hematopoietic cell lineage'	0.0345649	7.04189	7.05085	0.00896536
'GP5'	'04512: ECM-receptor interaction, 04640: Hematopoietic cell lineage'	0.449543	7.07038	7.08163	0.0112499
'GP6'	'04512: ECM-receptor interaction'	0.0501941	7.0372	7.05228	0.0150732
'GP9'	'04512: ECM-receptor interaction, 04640: Hematopoietic cell lineage'	0.26908	7.07254	7.08017	0.0076281
'GPAA1'	'00563: Glycosylphosphatidylinositol(GPI)-anchor biosynthesis'	0.600621	6.90231	6.91646	0.0141457
'GPAM'	'00561: Glycerolipid metabolism, 00564: Glycerophospholipid metabolism'	0.125586	6.97887	6.98723	0.00835791
'GPD1'	'00564: Glycerophospholipid metabolism'	0.547797	7.06299	7.07246	0.00946456
'GPD2'	'00564: Glycerophospholipid metabolism'	0.00205009	7.02515	7.03631	0.011159
'GPI'	'00010: Glycolysis / Gluconeogenesis, 00030: Pentose phosphate pathway, 00500: Starch and sucrose metabolism'	0.922769	6.93616	6.92538	-0.0107785
'GPLD1'	'00563: Glycosylphosphatidylinositol(GPI)-anchor biosynthesis'	0.342077	7.0392	7.04516	0.00595962
'GPR37'	'05020: Parkinson''s disease'	0.449543	7.0485	7.05114	0.00264528
'GPR50'	'04080: Neuroactive ligand-receptor interaction'	0.771176	7.07006	7.07401	0.00394817
'GPR63'	'04080: Neuroactive ligand-receptor interaction'	0.771176	7.05156	7.04435	-0.00721112
'GPT'	'00251: Glutamate metabolism, 00252: Alanine and aspartate metabolism, 00710: Carbon fixation'	0.74169	7.03185	7.03648	0.00463026
'GPX1'	'00480: Glutathione metabolism, 00590: Arachidonic acid metabolism, 05030: Amyotrophic lateral sclerosis (ALS)'	0.655633	6.83969	6.84871	0.00901878
'GRAP2'	'04660: T cell receptor signaling pathway'	0.286241	7.13421	7.14089	0.00668429
'GRIA1'	'04080: Neuroactive ligand-receptor interaction, 04720: Long-term potentiation, 04730: Long-term depression'	0.861471	7.07622	7.07159	-0.00463164
'GRIA2'	'04080: Neuroactive ligand-receptor interaction, 04720: Long-term potentiation, 04730: Long-term depression'	0.831108	7.0729	7.07302	0.000119754
'GRIA3'	'04080: Neuroactive ligand-receptor interaction, 04730: Long-term depression'	0.683881	7.06128	7.0596	-0.00167855
'GRIA4'	'04080: Neuroactive ligand-receptor interaction'	0.168626	7.06943	7.08125	0.0118206
'GRID2'	'04080: Neuroactive ligand-receptor interaction, 04730: Long-term depression'	0.473128	7.06485	7.06971	0.00486196
'GRIK1'	'04080: Neuroactive ligand-receptor interaction'	0.26908	7.06283	7.06861	0.0057841
'GRIK2'	'04080: Neuroactive ligand-receptor interaction'	0.145894	7.05143	7.07091	0.0194736
'GRIK3'	'04080: Neuroactive ligand-receptor interaction'	0.892039	7.06187	7.06664	0.00477419
'GRIK5'	'04080: Neuroactive ligand-receptor interaction'	0.207563	7.04051	7.03333	-0.0071785
'GRIN1'	'04020: Calcium signaling pathway, 04080: Neuroactive ligand-receptor interaction, 04720: Long-term potentiation'	0.861471	7.09514	7.09638	0.0012328
'GRIN2A'	'04020: Calcium signaling pathway, 04080: Neuroactive ligand-receptor interaction, 04720: Long-term potentiation'	0.953615	7.06798	7.05975	-0.00822306
'GRIN2B'	'04080: Neuroactive ligand-receptor interaction, 04720: Long-term potentiation'	0.145894	7.08322	7.08792	0.00470109
'GRIN2D'	'04020: Calcium signaling pathway, 04080: Neuroactive ligand-receptor interaction, 04720: Long-term potentiation'	0.831108	7.06723	7.06434	-0.00288778
'GRIN3A'	'04080: Neuroactive ligand-receptor interaction'	0.236912	7.06798	7.07513	0.00714655
'GRIN3B'	'04080: Neuroactive ligand-receptor interaction'	0.712579	7.06104	7.06403	0.00299185
'GRM1'	'04020: Calcium signaling pathway, 04080: Neuroactive ligand-receptor interaction, 04540: Gap junction, 04720: Long-term potentiation, 04730: Long-term depression'	0.892039	7.0672	7.07305	0.00584356
'GRM2'	'04080: Neuroactive ligand-receptor interaction'	0.627868	6.99248	7.01301	0.0205244
'GRM3'	'04080: Neuroactive ligand-receptor interaction'	0.304126	7.05871	7.06576	0.00705274
[truncated: 1,707 more rows]

## Sheet: Ewing pathways
Path Index	Path Description	pval hypergeom	size
[truncated: 191 more rows]

## Sheet: Met genes
Gene	Path	pval ranksum	median SN NON-MET	median SN MET	DeltaSN MET-NON-MET
[truncated: 2,618 more rows]

[truncated: 5 more sheets: Met pathways, Rel genes, Rel pathways,  Ageing genes (A vs E), Ageing pathways (A vs E)]
