# Supplementary material for: Multiscale characterization of ageing and cancer progression by a novel network entropy measure
Source: Royal Society of Chemistry journal article supplement (doi:10.1039/c5mb00143a), 2015-04-20
Supplement: c5mb00143a12.xlsx [file c5mb00143a12.xlsx]

## Sheet: Colon
GENE		ENTROPY				Intersection
Pathway Description	Pathway Index	Path Description	Path Index			' Caprolactam degradation'
' Citrate cycle (TCA cycle)'	'00020'	' Citrate cycle (TCA cycle)'	'00020'			' Citrate cycle (TCA cycle)'
' Pentose phosphate pathway'	'00030'	' Fructose and mannose metabolism'	'00051'			' ECM-receptor interaction'
' Fructose and mannose metabolism'	'00051'	' Fatty acid elongation in mitochondria'	'00062'			' Fatty acid elongation in mitochondria'
' Galactose metabolism'	'00052'	' Fatty acid metabolism'	'00071'			' Fatty acid metabolism'
' Fatty acid elongation in mitochondria'	'00062'	' Oxidative phosphorylation'	'00190'			' Focal adhesion'
' Fatty acid metabolism'	'00071'	' Methionine metabolism'	'00271'			' Fructose and mannose metabolism'
' Oxidative phosphorylation'	'00190'	' Valine, leucine and isoleucine degradation'	'00280'			' Nucleotide sugars metabolism'
' Glutamate metabolism'	'00251'	' Nucleotide sugars metabolism'	'00520'			' Oxidative phosphorylation'
' Glycine, serine and threonine metabolism'	'00260'	' Glyoxylate and dicarboxylate metabolism'	'00630'			' PPAR signaling pathway'
' Nucleotide sugars metabolism'	'00520'	' Propanoate metabolism'	'00640'			' Propanoate metabolism'
' Keratan sulfate biosynthesis'	'00533'	' Reductive carboxylate cycle (CO2 fixation)'	'00720'			' Reductive carboxylate cycle (CO2 fixation)'
' Glycosphingolipid biosynthesis - ganglioseries'	'00604'	' Nicotinate and nicotinamide metabolism'	'00760'
' Propanoate metabolism'	'00640'	' Caprolactam degradation'	'00930'
' Butanoate metabolism'	'00650'	' Cell Communication'	'01430'
' Reductive carboxylate cycle (CO2 fixation)'	'00720'	' PPAR signaling pathway'	'03320'
' Sulfur metabolism'	'00920'	' Cytokine-cytokine receptor interaction'	'04060'
' Caprolactam degradation'	'00930'	' Apoptosis'	'04210'
' Aminoacyl-tRNA biosynthesis'	'00970'	' Focal adhesion'	'04510'
' PPAR signaling pathway'	'03320'	' ECM-receptor interaction'	'04512'
' Focal adhesion'	'04510'	' Cell adhesion molecules (CAMs)'	'04514'
' ECM-receptor interaction'	'04512'	' Leukocyte transendothelial migration'	'04670'
		' Alzheimer''s disease'	'05010'

## Sheet: Ewing
GENE		ENTROPY				Intersection
Pathway Description	Pathway Index	Path Description	Path Index			' Cell Communication'
Glycolysis / Gluconeogenesis'	'00010'	' Glycolysis / Gluconeogenesis'	'00010'			' Fructose and mannose metabolism'
' Pentose phosphate pathway'	'00030'	' Pentose phosphate pathway'	'00030'			' Galactose metabolism'
' Fructose and mannose metabolism'	'00051'	' Fructose and mannose metabolism'	'00051'			' Glycosaminoglycan degradation'
' Galactose metabolism'	'00052'	' Galactose metabolism'	'00052'			' Glyoxylate and dicarboxylate metabolism'
' Bile acid biosynthesis'	'00120'	' Synthesis and degradation of ketone bodies'	'00072'			' Neurodegenerative Disorders'
' Pyrimidine metabolism'	'00240'	' C21-Steroid hormone metabolism'	'00140'			' Pentose phosphate pathway'
' Methionine metabolism'	'00271'	' Tryptophan metabolism'	'00380'			' Phenylalanine, tyrosine and tryptophan biosynthesis'
' Cysteine metabolism'	'00272'	' Phenylalanine, tyrosine and tryptophan biosynthesis'	'00400'			' Riboflavin metabolism'
' Histidine metabolism'	'00340'	' Starch and sucrose metabolism'	'00500'			' Starch and sucrose metabolism'
' Tryptophan metabolism'	'00380'	' N-Glycan degradation'	'00511'			' Streptomycin biosynthesis'
' Phenylalanine, tyrosine and tryptophan biosynthesis'	'00400'	' Nucleotide sugars metabolism'	'00520'			' Tryptophan metabolism'
' Aminophosphonate metabolism'	'00440'	' Streptomycin biosynthesis'	'00521'
' Selenoamino acid metabolism'	'00450'	' Aminosugars metabolism'	'00530'
' Starch and sucrose metabolism'	'00500'	' Glycosaminoglycan degradation'	'00531'
' Streptomycin biosynthesis'	'00521'	' Keratan sulfate biosynthesis'	'00533'
' Glycosaminoglycan degradation'	'00531'	' Glycosphingolipid biosynthesis - ganglioseries'	'00604'
' 1- and 2-Methylnaphthalene degradation'	'00624'	' Glyoxylate and dicarboxylate metabolism'	'00630'
' Nitrobenzene degradation'	'00626'	' Benzoate degradation via CoA ligation'	'00632'
' Glyoxylate and dicarboxylate metabolism'	'00630'	' Ethylbenzene degradation'	'00642'
' Riboflavin metabolism'	'00740'	' Riboflavin metabolism'	'00740'
' Nitrogen metabolism'	'00910'	' Pantothenate and CoA biosynthesis'	'00770'
' Cell Communication'	'01430'	' Folate biosynthesis'	'00790'
' Neurodegenerative Disorders'	'01510'	' Porphyrin and chlorophyll metabolism'	'00860'
' Cell cycle'	'04110'	' Cell Communication'	'01430'
' Olfactory transduction'	'04740'	' Neurodegenerative Disorders'	'01510'
' Pathogenic Escherichia coli infection - EHEC'	'05130'	' Focal adhesion'	'04510'
' Pathogenic Escherichia coli infection - EPEC'	'05131'	' ECM-receptor interaction'	'04512'
		' Circadian rhythm'	'04710'
		' Parkinson''s disease'	'05020'
		' Dentatorubropallidoluysian atrophy (DRPLA)'	'05050'
		' Cholera - Infection'	'05110'

## Sheet: Met
GENE		ENTROPY				Intersection
Path Index	Path Description	Path Index	Path Description			' Aminoacyl-tRNA biosynthesis'
'00010'	' Glycolysis / Gluconeogenesis'	'00010'	' Glycolysis / Gluconeogenesis'			' B cell receptor signaling pathway'
'00051'	' Fructose and mannose metabolism'	'00051'	' Fructose and mannose metabolism'			' Bile acid biosynthesis'
'00052'	' Galactose metabolism'	'00052'	' Galactose metabolism'			' C21-Steroid hormone metabolism'
'00120'	' Bile acid biosynthesis'	'00120'	' Bile acid biosynthesis'			' Carbon fixation'
'00140'	' C21-Steroid hormone metabolism'	'00140'	' C21-Steroid hormone metabolism'			' Cell adhesion molecules (CAMs)'
'00150'	' Androgen and estrogen metabolism'	'00251'	' Glutamate metabolism'			' Cysteine metabolism'
'00272'	' Cysteine metabolism'	'00272'	' Cysteine metabolism'			' Fructose and mannose metabolism'
'00340'	' Histidine metabolism'	'00340'	' Histidine metabolism'			' Galactose metabolism'
'00400'	' Phenylalanine, tyrosine and tryptophan biosynthesis'	'00410'	' beta-Alanine metabolism'			' Glycerolipid metabolism'
'00440'	' Aminophosphonate metabolism'	'00480'	' Glutathione metabolism'			' Glycolysis / Gluconeogenesis'
'00450'	' Selenoamino acid metabolism'	'00521'	' Streptomycin biosynthesis'			' Histidine metabolism'
'00521'	' Streptomycin biosynthesis'	'00530'	' Aminosugars metabolism'			' Jak-STAT signaling pathway'
'00533'	' Keratan sulfate biosynthesis'	'00533'	' Keratan sulfate biosynthesis'			' Keratan sulfate biosynthesis'
'00561'	' Glycerolipid metabolism'	'00561'	' Glycerolipid metabolism'			' Leukocyte transendothelial migration'
'00620'	' Pyruvate metabolism'	'00620'	' Pyruvate metabolism'			' Limonene and pinene degradation'
'00626'	' Nitrobenzene degradation'	'00640'	' Propanoate metabolism'			' Pathogenic Escherichia coli infection - EHEC'
'00710'	' Carbon fixation'	'00710'	' Carbon fixation'			' Pathogenic Escherichia coli infection - EPEC'
'00790'	' Folate biosynthesis'	'00903'	' Limonene and pinene degradation'			' Pyruvate metabolism'
'00903'	' Limonene and pinene degradation'	'00970'	' Aminoacyl-tRNA biosynthesis'			' Streptomycin biosynthesis'
'00970'	' Aminoacyl-tRNA biosynthesis'	'00980'	' Metabolism of xenobiotics by cytochrome P450'			' T cell receptor signaling pathway'
'03022'	' Basal transcription factors'	'03010'	' Ribosome'			' Toll-like receptor signaling pathway'
'04514'	' Cell adhesion molecules (CAMs)'	'04060'	' Cytokine-cytokine receptor interaction'			' Type I diabetes mellitus'
'04620'	' Toll-like receptor signaling pathway'	'04514'	' Cell adhesion molecules (CAMs)'
'04630'	' Jak-STAT signaling pathway'	'04540'	' Gap junction'
'04660'	' T cell receptor signaling pathway'	'04620'	' Toll-like receptor signaling pathway'
'04662'	' B cell receptor signaling pathway'	'04630'	' Jak-STAT signaling pathway'
'04670'	' Leukocyte transendothelial migration'	'04640'	' Hematopoietic cell lineage'
'04940'	' Type I diabetes mellitus'	'04650'	' Natural killer cell mediated cytotoxicity'
'05040'	' Huntington''s disease'	'04660'	' T cell receptor signaling pathway'
'05130'	' Pathogenic Escherichia coli infection - EHEC'	'04662'	' B cell receptor signaling pathway'
'05131'	' Pathogenic Escherichia coli infection - EPEC'	'04664'	' Fc epsilon RI signaling pathway'
		'04670'	' Leukocyte transendothelial migration'
		'04930'	' Type II diabetes mellitus'
		'04940'	' Type I diabetes mellitus'
		'05130'	' Pathogenic Escherichia coli infection - EHEC'
		'05131'	' Pathogenic Escherichia coli infection - EPEC'

## Sheet: Rel
GENE		ENTROPY			Intersection
Path Index	Path Description	Path Index	Path Description		' Antigen processing and presentation'
'00071'	' Fatty acid metabolism'	'00100'	' Biosynthesis of steroids'		' B cell receptor signaling pathway'
'00190'	' Oxidative phosphorylation'	'00240'	' Pyrimidine metabolism'		' Cell adhesion molecules (CAMs)'
'00240'	' Pyrimidine metabolism'	'00565'	' Ether lipid metabolism'		' Chronic myeloid leukemia'
'00310'	' Lysine degradation'	'00980'	' Metabolism of xenobiotics by cytochrome P450'		' DNA polymerase'
'00565'	' Ether lipid metabolism'	'03020'	' RNA polymerase'		' ECM-receptor interaction'
'00591'	' Linoleic acid metabolism'	'03030'	' DNA polymerase'		' Ether lipid metabolism'
'00670'	' One carbon pool by folate'	'03050'	' Proteasome'		' Natural killer cell mediated cytotoxicity'
'00930'	' Caprolactam degradation'	'04110'	' Cell cycle'		' Pancreatic cancer'
'01430'	' Cell Communication'	'04120'	' Ubiquitin mediated proteolysis'		' Proteasome'
'03030'	' DNA polymerase'	'04512'	' ECM-receptor interaction'		' Pyrimidine metabolism'
'03050'	' Proteasome'	'04514'	' Cell adhesion molecules (CAMs)'		' Thyroid cancer'
'03060'	' Protein export'	'04612'	' Antigen processing and presentation'		' Type I diabetes mellitus'
'03320'	' PPAR signaling pathway'	'04650'	' Natural killer cell mediated cytotoxicity'		' Ubiquitin mediated proteolysis'
'04120'	' Ubiquitin mediated proteolysis'	'04662'	' B cell receptor signaling pathway'
'04512'	' ECM-receptor interaction'	'04940'	' Type I diabetes mellitus'
'04514'	' Cell adhesion molecules (CAMs)'	'05120'	' Epithelial cell signaling in Helicobacter pylori infection'
'04612'	' Antigen processing and presentation'	'05212'	' Pancreatic cancer'
'04650'	' Natural killer cell mediated cytotoxicity'	'05216'	' Thyroid cancer'
'04662'	' B cell receptor signaling pathway'	'05220'	' Chronic myeloid leukemia'
'04940'	' Type I diabetes mellitus'
'05212'	' Pancreatic cancer'
'05216'	' Thyroid cancer'
'05220'	' Chronic myeloid leukemia'

## Sheet: Ageing(A vs E)
GENE		ENTROPY			Intersection
Path Index	Path Description	Path Index	Path Description		' Histidine metabolism'
'00251'	' Glutamate metabolism'	'00150'	' Androgen and estrogen metabolism'
'00252'	' Alanine and aspartate metabolism'	'00340'	' Histidine metabolism'
'00340'	' Histidine metabolism'	'03010'	' Ribosome'
'00350'	' Tyrosine metabolism'	'03030'	' DNA polymerase'
'00410'	' beta-Alanine metabolism'	'03050'	' Proteasome'
'00531'	' Glycosaminoglycan degradation'	'04320'	' Dorso-ventral axis formation'
'00562'	' Inositol phosphate metabolism'	'04640'	' Hematopoietic cell lineage'
'00760'	' Nicotinate and nicotinamide metabolism'	'04660'	' T cell receptor signaling pathway'
'01030'	' Glycan structures - biosynthesis 1'	'04662'	' B cell receptor signaling pathway'
'01430'	' Cell Communication'	'05040'	' Huntington''s disease'
'04512'	' ECM-receptor interaction'
'04612'	' Antigen processing and presentation'
'04730'	' Long-term depression'
'04920'	' Adipocytokine signaling pathway'
